# Supplementary material for: Efficient and simplified strategy to access novel polysulfamate materials: from laboratory research to industrial production
Source: Royal Society of Chemistry journal article supplement (doi:10.1039/d4py01383b), 2025-01-01

## Supporting Information

### Efficient and Simplified Strategy to Access Novel Polysulfamate Materials: from Laboratory Research to Industrial Production

*Xingyu Ma, Pengqiang Liang, Zhongqiang Zhao, Jinwei Chen, Xueqing Wang, Yunbin Zhou,  
Xianxing Jiang\* and Weiwei Zhu\**

Email: zhuww8@mail.sysu.edu.cn; jiangxx5@mail.sysu.edu.cn

#### Table of contents

|                                                                     |    |
|---------------------------------------------------------------------|----|
| 1. General information .....                                        | 1  |
| 2. Nucleophilic construction of sulfamate bond .....                | 1  |
| 2.1 Conditions screening.....                                       | 1  |
| 2.2 Synthesis of sulfamates.....                                    | 3  |
| 3. Laboratory synthesis of PSA .....                                | 9  |
| 3.1 Conditions screening.....                                       | 9  |
| 3.2 Synthesis of PSAs from diverse building blocks.....             | 9  |
| 3.2.1 Synthesis of alkylsulfamoyl fluorides <sup>3</sup> .....      | 9  |
| 3.2.2 Synthesis of PSAs <sup>4,5</sup> .....                        | 10 |
| 3.3. Hundred gram-scale synthesis of P1.....                        | 17 |
| 4. Characterization of the polymers .....                           | 17 |
| 4.1 Molecular weight and polymer dispersity index of polymers ..... | 17 |
| 4.2 Thermal properties of polymers.....                             | 18 |
| 4.3 Mechanical properties of polymers.....                          | 19 |
| 4.4 Solvent-stability of P1.....                                    | 24 |
| 5. Industrial production of PSA .....                               | 24 |
| 5.1 Industrial production of P1 .....                               | 24 |
| 5.2 Mechanical properties of industrial products of P1 .....        | 25 |
| 6. References.....                                                  | 25 |
| 7. Copies of the NMR spectra and DSC curve of new compounds.....    | 27 |
| 7.1 Copies of the NMR spectra of monomers.....                      | 27 |
| 7.2 Copies of the NMR spectra of polymers.....                      | 54 |
| 7.3 Copies of the DSC curves of polymers.....                       | 82 |
| 7.4 Copies of the GPC traces of polymers.....                       | 96 |

## 1. General information

All chemical reagents were purchased in analytical grade from commercial suppliers and unless otherwise noted, all commercial reagents were used without further purification. Merck F-254 silica gel plates were used for thin layer analytical chromatography (TLC). Column chromatography purification was carried out using EMD (Merck) Silica Gel 60 (40-63  $\mu\text{m}$ ).  $^1\text{H}$ ,  $^{13}\text{C}$  and  $^{19}\text{F}$  NMR spectra were recorded with BRUKER Ascend 400 M & BRUKER Ascend 500 M at 25°C. The spectra were recorded in  $\text{CDCl}_3$  or  $\text{DMSO-}d_6$  as solvent. Multiplicity was described as follows: s (singlet); d (doublet); t (triplet); m (multiplet); dd (doublet of doublets), etc. and coupling constants ( $J$ ) were given in Hz. Chemical shifts are reported in ppm relative to TMS as an internal standard. The peak around delta value of  $^1\text{H}$  NMR 7.26 and 2.5 are corresponding to deuterated solvent chloroform and DMSO respectively, and the peaks around delta value of  $^1\text{H}$  NMR (1.56 and 3.3) are corresponding to water contained in  $\text{CDCl}_3$  and  $\text{DMSO-}d_6$  respectively. The peak around delta values of  $^{13}\text{C}$  NMR around 77.4 and 39.5 referenced to the appropriate NMR solvent residual peaks of  $\text{CDCl}_3$  and  $\text{DMSO-}d_6$  respectively. The molecular weight and polymer dispersity index were measured using a gel permeation chromatography (GPC) system (EliteHPLC P3100, China). Thermal properties were evaluated through differential scanning calorimetry (DSC) using a DSC 3500 Sirius instrument (Netzsch, Germany) and thermogravimetric analysis (TGA) using a TGA Q50 instrument (TA Instruments, USA). High-resolution mass spectrometric (HRMS) data were obtained on an Agilent 6210 time-of-flight HPLC/MS spectrometer (ESI-TOF).

## 2. Nucleophilic construction of sulfamate bond

### 2.1 Conditions screening

Table S1 shows the conditions screening results of the reaction. Inspired by our previous work, the reaction of pyrrolidine-1-sulfonyl fluoride (**1a**) and 4-(2-phenylpropan-2-yl)phenol (**2a**) in the presence of  $\text{Na}_2\text{CO}_3$  in DMF was employed to optimize the reaction conditions. When the reaction was carried out at rt for 1 h, the desired product **3a** was obtained in trace. Increasing the reaction temperature leads to increased yields of **3a** (Table S1, entries 2-5). While the yield of **3a** was decreased when the reaction temperature was 150°C (Table S1, entry 6), this might because the destruction of sulfamate bond and DMF at high temperature under alkaline conditions. Prolonging the reaction time to 2 h (Table S1, entry 7) also give a higher yield of **3a** while the yield of **3a** was decreased when the reaction time was prolonged to 4 h (Table S1,

entry 8). NMP and Sulfolane didn't give superior yields of 3a (Table S1, entries 9 and 10). When K<sub>2</sub>CO<sub>3</sub> was applied, the yield of 3a was 95% (Table S1, entry 11), other IOB didn't show superior results (Table S1, entries 12-15). Then we got the optimal reaction conditions: the reaction was carried out in DMF (0.5 M) at 135°C for 2 h in the presence of K<sub>2</sub>CO<sub>3</sub>.

**Table S1** conditions screening of the sulfamate bond formation reaction<sup>a</sup>

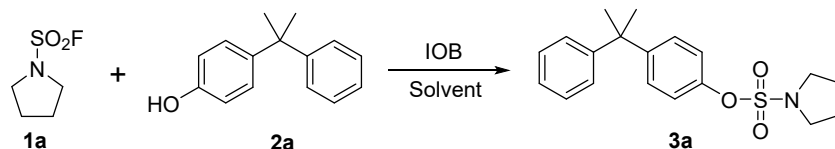

| Entry | Temperature <sup>b</sup> | Solvent   | IOB                             | R. T. | Yield <sup>c</sup> |
|-------|--------------------------|-----------|---------------------------------|-------|--------------------|
| 1     | rt                       | DMF       | Na <sub>2</sub> CO <sub>3</sub> | 1 h   | trace <sup>d</sup> |
| 2     | 50°C                     | DMF       | Na <sub>2</sub> CO <sub>3</sub> | 1 h   | 18%                |
| 3     | 80°C                     | DMF       | Na <sub>2</sub> CO <sub>3</sub> | 1 h   | 42%                |
| 4     | 120°C                    | DMF       | Na <sub>2</sub> CO <sub>3</sub> | 1 h   | 75%                |
| 5     | 135°C                    | DMF       | Na <sub>2</sub> CO <sub>3</sub> | 1 h   | 83%                |
| 6     | 150°C                    | DMF       | Na <sub>2</sub> CO <sub>3</sub> | 1 h   | 72%                |
| 7     | 135°C                    | DMF       | Na <sub>2</sub> CO <sub>3</sub> | 2 h   | 88%                |
| 8     | 135°C                    | DMF       | Na <sub>2</sub> CO <sub>3</sub> | 4 h   | 82%                |
| 9     | 135°C                    | NMP       | Na <sub>2</sub> CO <sub>3</sub> | 2 h   | 62%                |
| 10    | 135°C                    | Sulfolane | Na <sub>2</sub> CO <sub>3</sub> | 2 h   | 85%                |
| 11    | 135°C                    | DMF       | K <sub>2</sub> CO <sub>3</sub>  | 2 h   | 95%                |
| 12    | 135°C                    | DMF       | Li <sub>2</sub> CO <sub>3</sub> | 2 h   | 35%                |
| 13    | 135°C                    | DMF       | MgCO <sub>3</sub>               | 2 h   | trace              |
| 14    | 135°C                    | DMF       | CaCO <sub>3</sub>               | 2 h   | trace              |
| 15    | 135°C                    | DMF       | NaOH                            | 2 h   | 45%                |

<sup>a</sup>The reaction was carried out on 2 mmol scale in 4 mL solvent. 1.1 equiv. of IOB was applied for the formation of **3a-3d** and **3p-3s**, while 2.2 equiv. of IOB was applied for the formation of **3e-3o**. <sup>b</sup>External temperature. <sup>c</sup>Isolated yield. <sup>d</sup>Determined by HPLC. IOB, inorganic base. rt, room temperature. R. T., reaction time.

Note: we chose polar solvent including *N,N*-dimethylformamide (DMF), *N*-methylpyrrolidone (NMP) and sulfolane because these solvents exhibited better performance in our next polycondensation reaction.

## 2.2 Synthesis of sulfamates

**General procedure for synthesis of 1a and 1b:** **1a** and **1b** were synthesized according to previous work,<sup>3</sup> also see section S3.2.1.

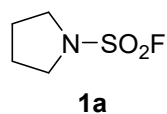

**pyrrolidine-1-sulfonyl fluoride (1a)**, white solid, 95% yield. <sup>1</sup>H NMR (400 MHz, Chloroform-*d*) δ 3.49 (t, *J* = 6.9 Hz, 4H), 2.10-1.91 (m, 4H). <sup>13</sup>C NMR (100 MHz, Chloroform-*d*) δ 49.2, 25.6. <sup>19</sup>F NMR (376 MHz, Chloroform-*d*) δ 35.97.

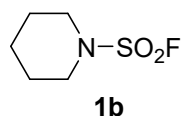

**piperidine-1-sulfonyl fluoride (1b)**, white solid, 94% yield. <sup>1</sup>H NMR (400 MHz, Chloroform-*d*) δ 3.43 (*J* = 5.2 Hz, 4H), 1.74-1.68 (m, 4H), 1.65-1.61 (m, 2H). <sup>13</sup>C NMR (100 MHz, Chloroform-*d*) δ 48.0, 24.5, 23.1. <sup>19</sup>F NMR (376 MHz, Chloroform-*d*) δ 39.75.

**General procedure for synthesis of 3a-3s:** 2 mmol of alkylsulfamoyl fluorides (1.0 equiv.), 4 mL of DMF and K<sub>2</sub>CO<sub>3</sub> (1.1 equiv. for the formation of **3a-3d** and **3p-3s** and 2.2 equiv. for the formation of **3e-3o**) were added to a 10 mL flask, then the flask was heated at 135°C for 2 h. The reaction was quenched by water (10 mL). When the mixture was cooled to rt, the mixture was extracted with ethyl acetate and washed with brine. The combined organic layers were dried over Na<sub>2</sub>SO<sub>4</sub>. After filtration, the filtrate was concentrated under reduced pressure. The residue was purified by column chromatography (EtOAc-hexane elution: hexane/EtOAc (V/V) = 100:1~10:1) on silica gel to provide the sulfamates.

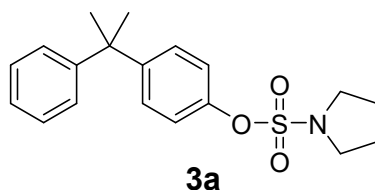

**4-(2-phenylpropan-2-yl)phenyl pyrrolidine-1-sulfonate (3a)**, white solid, 95% yield. <sup>1</sup>H NMR (500 MHz, Chloroform-*d*) δ 7.28-7.16 (m, 9H), 3.43 (t, *J* = 6.7 Hz, 4H), 2.00-1.89 (m, 4H), 1.67 (s, 6H). <sup>13</sup>C NMR (125 MHz, Chloroform-*d*) δ 150.1, 149.3, 148.2, 128.2, 126.7, 125.8, 121.2, 49.2, 42.8, 30.8, 25.7. HRMS (ESI-TOF) *m/z*: [M+H]<sup>+</sup> Calcd for C<sub>19</sub>H<sub>24</sub>NO<sub>3</sub>S [M+H]<sup>+</sup>: 346.1471, found 346.1473.

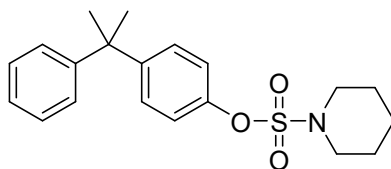

**3b**

**4-(2-phenylpropan-2-yl)phenyl piperidine-1-sulfonate (3b)**, white solid, 96% yield.  $^1\text{H}$  NMR (500 MHz, Chloroform-*d*)  $\delta$  7.21-7.07 (m, 9H), 3.28 (t,  $J = 5.5$  Hz, 4H), 1.59 (s, 6H), 1.57-1.55 (m, 4H), 1.50-1.47 (m, 2H).  $^{13}\text{C}$  NMR (126 MHz, Chloroform-*d*)  $\delta$  150.1, 149.2, 148.1, 128.1, 126.7, 125.8, 121.1, 47.9, 42.8, 30.8, 25.0, 23.5. HRMS (ESI-TOF)  $m/z$ :  $[\text{M}+\text{H}]^+$  Calcd for  $\text{C}_{20}\text{H}_{26}\text{NO}_3\text{S}$   $[\text{M}+\text{H}]^+$ : 360.1628, found 360.1627.

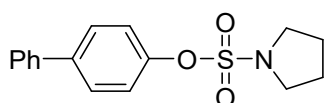

**3c**

**[1,1'-biphenyl]-4-yl pyrrolidine-1-sulfonate (3c)**, white solid, 90% yield.  $^1\text{H}$  NMR (400 MHz, Chloroform-*d*)  $\delta$  7.59 (d,  $J = 8.8$  Hz, 2H), 7.56 (d,  $J = 7.2$  Hz, 2H), 7.44 (t,  $J = 8.0$  Hz, 2H), 7.37-7.34 (m, 3H), 3.48 (t,  $J = 6.8$  Hz, 4H), 1.98-1.94 (m, 4H).  $^{13}\text{C}$  NMR (100 MHz, Chloroform-*d*)  $\delta$  149.7, 140.0, 139.8, 128.9, 127.6, 127.1, 122.2, 49.3, 25.8. HRMS (ESI-TOF)  $m/z$ :  $[\text{M}+\text{H}]^+$  Calcd for  $\text{C}_{16}\text{H}_{18}\text{NO}_3\text{S}$   $[\text{M}+\text{H}]^+$ : 304.1002, found 304.1003.

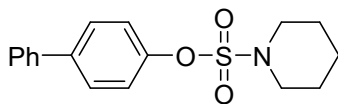

**3d**

**[1,1'-biphenyl]-4-yl piperidine-1-sulfonate (3d)**, white solid, 94% yield.  $^1\text{H}$  NMR (400 MHz, Chloroform-*d*)  $\delta$  7.57 (d,  $J = 8.4$  Hz, 2H), 7.54 (d,  $J = 7.2$  Hz, 2H), 7.42 (t,  $J = 8.0$  Hz, 2H), 7.35-7.32 (m, 3H), 3.49 (t,  $J = 5.6$  Hz, 4H), 1.68-1.62 (m, 4H), 1.58-1.54 (m, 4H).  $^{13}\text{C}$  NMR (100 MHz, Chloroform-*d*)  $\delta$  149.7, 140.0, 139.8, 128.9, 128.4, 127.6, 127.1, 122.1, 48.0, 25.0, 23.5. HRMS (ESI-TOF)  $m/z$ :  $[\text{M}+\text{H}]^+$  Calcd for  $\text{C}_{17}\text{H}_{20}\text{NO}_3\text{S}$   $[\text{M}+\text{H}]^+$ : 318.1158, found 318.1155.

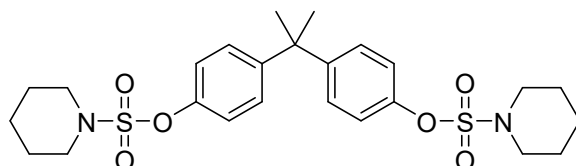

**3e**

**propane-2,2-diylbis(4,1-phenylene) bis(piperidine-1-sulfonate) (3e)**, white solid, 93% yield.  $^1\text{H}$  NMR (500 MHz, Chloroform-*d*)  $\delta$  7.20 (d,  $J = 8.9$  Hz, 4H), 7.16 (d,  $J = 8.8$  Hz, 4H), 3.37 (t,  $J = 5.5$  Hz, 8H), 1.69-1.65 (m, 14H), 1.60-1.56 (m, 4H).  $^{13}\text{C}$  NMR (125 MHz, Chloroform-*d*)

$\delta$  148.6, 148.2, 128.1, 121.2, 47.9, 42.6, 30.9, 25.0, 23.5. HRMS (ESI-TOF)  $m/z$ :  $[M+H]^+$  Calcd for  $C_{25}H_{35}N_2O_6S_2$   $[M+H]^+$ : 523.1931, found 523.1933.

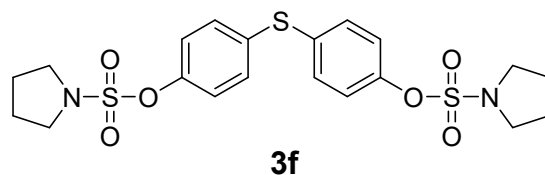

**thiobis(4,1-phenylene) bis(pyrrolidine-1-sulfonate) (3f)**, white solid, 92% yield.  $^1H$  NMR (500 MHz, Chloroform-*d*)  $\delta$  7.33 (d,  $J$  = 8.5 Hz, 4H), 7.23 (d,  $J$  = 8.5 Hz, 4H), 3.46 (t,  $J$  = 5.5 Hz, 8H), 1.98-1.95 (m, 8H).  $^{13}C$  NMR (125 MHz, Chloroform-*d*)  $\delta$  149.6, 133.7, 132.4, 122.8, 49.3, 25.7. HRMS (ESI-TOF)  $m/z$ :  $[M+Na]^+$  Calcd for  $C_{20}H_{24}N_2O_6S_3Na$   $[M+Na]^+$ : 507.0689, found 507.0686.

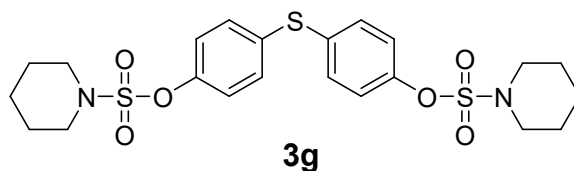

**thiobis(4,1-phenylene) bis(piperidine-1-sulfonate) (3g)**, white solid, 93% yield.  $^1H$  NMR (500 MHz, Chloroform-*d*)  $\delta$  7.33 (d,  $J$  = 8.5 Hz, 4H), 7.22 (d,  $J$  = 8.5 Hz, 4H), 3.38 (t,  $J$  = 5.5 Hz, 8H), 1.70-1.66 (m, 8H), 1.61-1.58 (m, 4H).  $^{13}C$  NMR (126 MHz, Chloroform-*d*)  $\delta$  149.6, 133.7, 132.4, 122.7, 48.0, 25.0, 23.4. HRMS (ESI-TOF)  $m/z$ :  $[M+Na]^+$  Calcd for  $C_{22}H_{28}N_2O_6S_3Na$   $[M+Na]^+$ : 535.1002, found 535.1003.

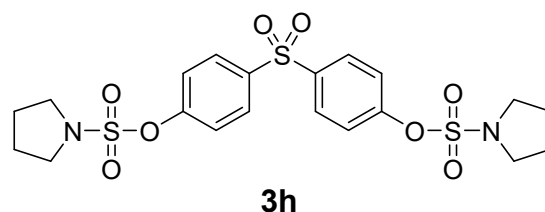

**sulfonylbis(4,1-phenylene) bis(pyrrolidine-1-sulfonate) (3h)**, white solid, 95% yield.  $^1H$  NMR (500 MHz, Chloroform-*d*)  $\delta$  7.96 (d,  $J$  = 8.5 Hz, 4H), 7.42 (d,  $J$  = 8.5 Hz, 4H), 3.48 (t,  $J$  = 5.5 Hz, 8H), 2.00-1.97 (m, 8H).  $^{13}C$  NMR (125 MHz, Chloroform-*d*)  $\delta$  154.2, 139.0, 129.8, 122.5, 49.4, 25.7. HRMS (ESI-TOF)  $m/z$ :  $[M+H]^+$  Calcd for  $C_{20}H_{25}N_2O_8S_3$   $[M+H]^+$ : 517.0768, found 517.0764.

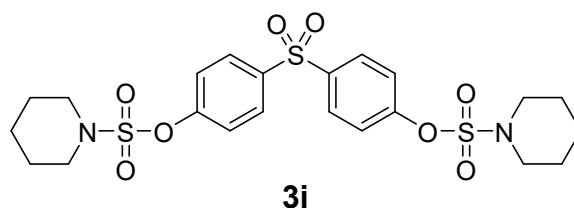

**sulfonylbis(4,1-phenylene) bis(piperidine-1-sulfonate) (3i)**, white solid, 96% yield.  $^1H$  NMR (500 MHz, Chloroform-*d*)  $\delta$  7.24 (d,  $J$  = 8.5 Hz, 4H), 7.16 (d,  $J$  = 8.5 Hz, 4H), 3.35 (t,  $J$  = 5.5

Hz, 8H), 1.64-1.63 (m, 8H), 1.57-1.53 (m, 4H).  $^{13}\text{C}$  NMR (125 MHz, Chloroform-*d*)  $\delta$  148.0, 146.6, 128.4, 121.4, 47.9, 25.0, 23.5. HRMS (ESI-TOF)  $m/z$ :  $[\text{M}+\text{H}]^+$  Calcd for  $\text{C}_{22}\text{H}_{29}\text{N}_2\text{O}_8\text{S}_3$   $[\text{M}+\text{H}]^+$ : 545.1081, found 545.1082.

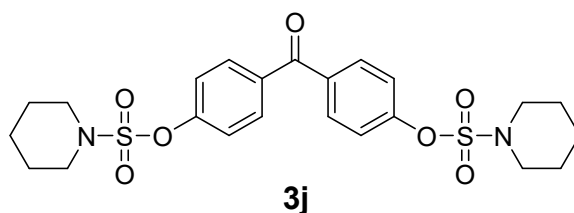

**carbonylbis(4,1-phenylene) bis(piperidine-1-sulfonate) (3j)**, white solid, 92% yield.  $^1\text{H}$  NMR (500 MHz, Chloroform-*d*)  $\delta$  7.83 (d,  $J = 8.5$  Hz, 4H), 7.40 (d,  $J = 8.5$  Hz, 4H), 3.43 (t,  $J = 4.5$  Hz, 8H), 1.72-1.69 (m, 8H), 1.63-1.60 (m, 4H).  $^{13}\text{C}$  NMR (125 MHz, Chloroform-*d*)  $\delta$  194.0, 153.6, 135.3, 131.8, 121.5, 48.0, 24.9, 23.4. HRMS (ESI-TOF)  $m/z$ :  $[\text{M}+\text{H}]^+$  Calcd for  $\text{C}_{23}\text{H}_{29}\text{N}_2\text{O}_7\text{S}_2$   $[\text{M}+\text{H}]^+$ : 509.1411, found 509.1411.

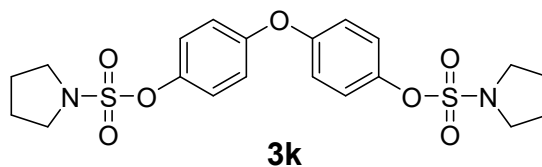

**oxybis(4,1-phenylene) bis(pyrrolidine-1-sulfonate) (3k)**, white solid, 91% yield.  $^1\text{H}$  NMR (500 MHz, Chloroform-*d*)  $\delta$  7.24 (d,  $J = 8.5$  Hz, 4H), 7.17 (d,  $J = 8.5$  Hz, 4H), 3.42 (t,  $J = 6.5$  Hz, 8H), 1.93-1.91 (m, 8H).  $^{13}\text{C}$  NMR (125 MHz, Chloroform-*d*)  $\delta$  148.0, 146.7, 128.4, 121.5, 49.2, 25.7. HRMS (ESI-TOF)  $m/z$ :  $[\text{M}+\text{H}]^+$  Calcd for  $\text{C}_{20}\text{H}_{25}\text{N}_2\text{O}_7\text{S}_2$   $[\text{M}+\text{H}]^+$ : 469.1098, found 469.1095.

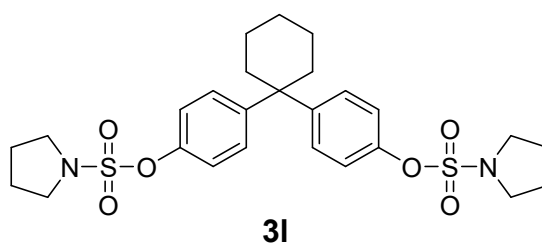

**cyclohexane-1,1-diylbis(4,1-phenylene) bis(pyrrolidine-1-sulfonate) (3l)**, white solid, 96% yield.  $^1\text{H}$  NMR (500 MHz, Chloroform-*d*)  $\delta$  7.24 (d,  $J = 8.5$  Hz, 4H), 7.17 (d,  $J = 8.5$  Hz, 4H), 3.42 (t,  $J = 6.5$  Hz, 8H), 2.24-2.22 (m, 4H), 1.93-1.91 (m, 8H), 1.55-1.49 (m, 6H).  $^{13}\text{C}$  NMR (125 MHz, Chloroform-*d*)  $\delta$  148.0, 146.7, 128.4, 121.5, 49.2, 45.8, 37.2, 26.2, 25.7, 22.8. HRMS (ESI-TOF)  $m/z$ :  $[\text{M}+\text{H}]^+$  Calcd for  $\text{C}_{26}\text{H}_{35}\text{N}_2\text{O}_6\text{S}_2$   $[\text{M}+\text{H}]^+$ : 535.1931, found 535.1932.

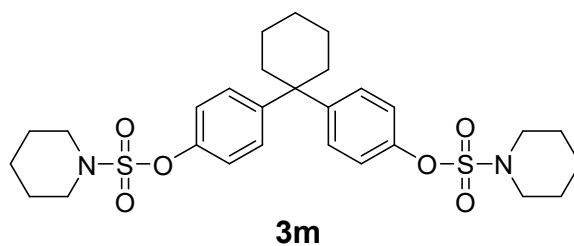

**cyclohexane-1,1-diylbis(4,1-phenylene) bis(piperidine-1-sulfonate) (3m)**, white solid, 95% yield.  $^1\text{H}$  NMR (500 MHz, Chloroform-*d*)  $\delta$  7.24 (d,  $J = 8.5$  Hz, 4H), 7.16 (d,  $J = 8.5$  Hz, 4H), 3.35 (t,  $J = 5.5$  Hz, 8H), 2.24-2.22 (m, 4H), 1.66-1.62 (m, 8H), 1.56-1.48 (m, 10H).  $^{13}\text{C}$  NMR (125 MHz, Chloroform-*d*)  $\delta$  148.0, 146.6, 128.4, 121.4, 47.9, 45.8, 37.2, 26.2, 25.0, 23.4, 22.8. HRMS (ESI-TOF)  $m/z$ :  $[\text{M}+\text{H}]^+$  Calcd for  $\text{C}_{28}\text{H}_{39}\text{N}_2\text{O}_6\text{S}_2$   $[\text{M}+\text{H}]^+$ : 563.2244, found 563.2245.

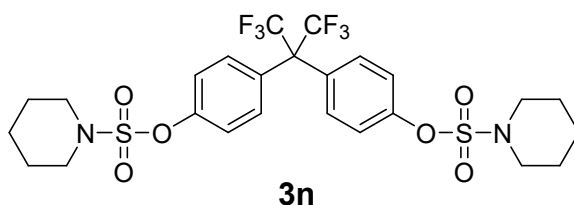

**(perfluoropropane-2,2-diyl)bis(4,1-phenylene) bis(piperidine-1-sulfonate) (3n)**, white solid, 92% yield.  $^1\text{H}$  NMR (500 MHz, Chloroform-*d*)  $\delta$  7.32 (d,  $J = 8.5$  Hz, 4H), 7.22 (d,  $J = 9.0$  Hz, 4H), 3.33 (t,  $J = 5.5$  Hz, 8H), 1.63-1.58 (m, 8H), 1.54-1.50 (m, 4H).  $^{13}\text{C}$  NMR (125 MHz, Chloroform-*d*)  $\delta$  150.8, 131.7, 131.1, 123.9 (q,  $J = 286.6$  Hz, 2C), 121.4, 64.2-63.5 (m, 1C), 48.0, 24.9, 23.3. HRMS (ESI-TOF)  $m/z$ :  $[\text{M}+\text{H}]^+$  Calcd for  $\text{C}_{25}\text{H}_{29}\text{F}_6\text{N}_2\text{O}_6\text{S}_2$   $[\text{M}+\text{H}]^+$ : 631.1366, found 631.1367.

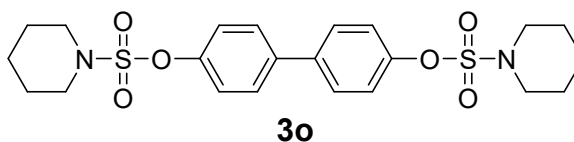

**1,1'-biphenyl]-4,4'-diyl bis(pyrrolidine-1-sulfonate) (3o)**, white solid, 94% yield.  $^1\text{H}$  NMR (500 MHz, Chloroform-*d*)  $\delta$  7.33 (d,  $J = 8.5$  Hz, 4H), 7.22 (d,  $J = 8.5$  Hz, 4H), 3.38 (t,  $J = 5.5$  Hz, 8H), 1.70-1.65 (m, 8H), 1.61-1.58 (m, 4H).  $^{13}\text{C}$  NMR (125 MHz, Chloroform-*d*)  $\delta$  149.6, 133.7, 132.4, 122.7, 48.0, 25.0, 23.4.

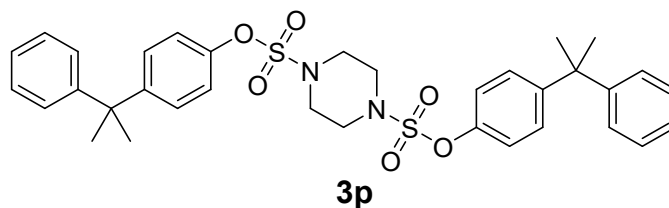

**bis(4-(2-phenylpropan-2-yl)phenyl) piperazine-1,4-disulfonate (3p)**, white solid, 95% yield.  $^1\text{H}$  NMR (500 MHz, Chloroform-*d*)  $\delta$  7.27-7.10 (m, 18H), 3.49 (t,  $J = 5.5$  Hz, 8H), 1.67 (s, 12H).  $^{13}\text{C}$  NMR (125 MHz, Chloroform-*d*)  $\delta$  149.9, 147.7 (2C), 128.3, 128.1, 126.7, 125.9,



121.2, 51.8, 48.7, 30.8, 28.1. HRMS (ESI-TOF)  $m/z$ :  $[M+Na]^+$  Calcd for  $C_{34}H_{38}N_2O_6S_2Na$   $[M+Na]^+$ : 657.2064, found 657.2064.

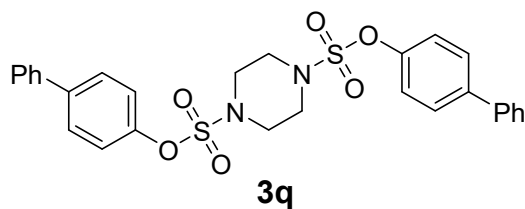

**di([1,1'-biphenyl]-4-yl) piperazine-1,4-disulfonate (3q)**, white solid, 92% yield.  $^1H$  NMR (500 MHz, Chloroform-*d*)  $\delta$  7.58-7.55 (m, 4H), 7.54 (d,  $J = 7.2$  Hz, 4H), 7.44 (t,  $J = 8.0$  Hz, 4H), 7.37-7.34 (m, 6H), 3.45 (t,  $J = 5.5$  Hz, 8H).  $^{13}C$  NMR (125 MHz, Chloroform-*d*)  $\delta$  149.8, 140.1, 139.7, 128.9, 128.2, 127.7, 127.2, 122.2, 49.3. HRMS (ESI-TOF)  $m/z$ :  $[M+Na]^+$  Calcd for  $C_{28}H_{26}N_2O_6S_2Na$   $[M+Na]^+$ : 573.1125, found 573.1123.

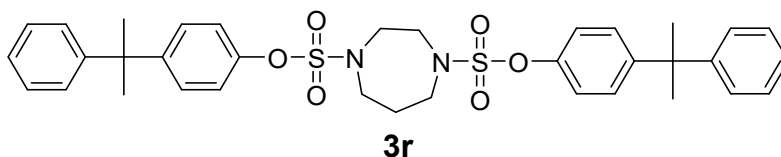

**bis(4-(2-phenylpropan-2-yl)phenyl) 1,4-diazepane-1,4-disulfonate (3r)**, white solid, 95% yield.  $^1H$  NMR (400 MHz, Chloroform-*d*)  $\delta$  7.29-7.23 (m, 8H), 7.19 (d,  $J = 8.0$  Hz, 6H), 7.13 (d,  $J = 8.8$  Hz, 4H), 3.53-3.50 (m, 8H), 2.01 (q,  $J = 6.3$  Hz, 2H), 1.67 (s, 12H).  $^{13}C$  NMR (100 MHz, Chloroform-*d*)  $\delta$  153.3, 146.9, 128.9, 128.2, 127.5, 126.7, 125.9, 118.3, 51.8, 48.1, 45.1, 31.8, 28.7. HRMS (ESI-TOF)  $m/z$ :  $[M+Na]^+$  Calcd for  $C_{35}H_{40}N_2O_6S_2Na$   $[M+Na]^+$ : 671.2220, found 671.2223.

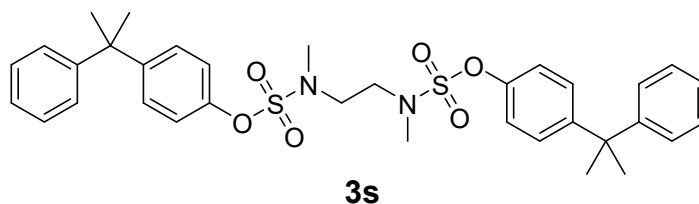

**bis(4-(2-phenylpropan-2-yl)phenyl) ethane-1,2-diylbis(methylsulfamate) (3s)**, white solid, 92% yield.  $^1H$  NMR (400 MHz, Chloroform-*d*)  $\delta$  7.29-7.17 (m, 14H), 7.14 (d,  $J = 8.8$  Hz, 4H), 3.42 (t,  $J = 5.6$  Hz, 4H), 2.99 (s, 6H), 1.66 (s, 12H).  $^{13}C$  NMR (100 MHz, Chloroform-*d*)  $\delta$  150.0, 149.8, 147.8, 128.3, 127.4, 127.1, 125.9, 121.2, 50.7, 44.5, 39.1, 26.9. HRMS (ESI-TOF)  $m/z$ :  $[M+H]^+$  Calcd for  $C_{34}H_{41}N_2O_6S_2$   $[M+H]^+$ : 637.2401, found 637.2403.

### 3. Laboratory synthesis of PSA

#### 3.1 Conditions screening

Reaction of piperazine with propane-2,2-diylbis(4,1-phenylene) bis(sulfurofluoridate)<sup>2</sup>.

The reaction of piperazine (**a**) and propane-2,2-diylbis(4,1-phenylene) bis(sulfurofluoridate) (**b**) were applied to verify the polycondensation of aryl fluorosulfates and aliphatic amines.

**Table S2.** Conditions screening for the reaction of **a** and **b**<sup>a</sup>

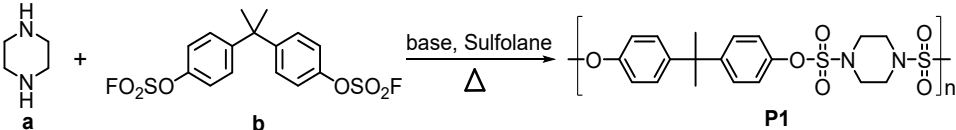

| Entry | Base                            | Catalyst   | <i>T</i> /°C | <i>M</i> <sub>n</sub> <sup>PS</sup> /kDa | PDI  |
|-------|---------------------------------|------------|--------------|------------------------------------------|------|
| 1     | Na <sub>2</sub> CO <sub>3</sub> | --         | 170          | 4.1                                      | 2.32 |
| 2     | Na <sub>2</sub> CO <sub>3</sub> | DMAP (10%) | 170          | 11.0                                     | 1.93 |
| 3     | K <sub>2</sub> CO <sub>3</sub>  | DMAP (10%) | 170          | 7.1                                      | 2.12 |
| 4     | Li <sub>2</sub> CO <sub>3</sub> | DMAP (10%) | 170          | 14.8                                     | 1.89 |
| 5     | NaHCO <sub>3</sub>              | DMAP (10%) | 170          | 12.4                                     | 1.92 |
| 6     | Na <sub>3</sub> PO <sub>4</sub> | DMAP (10%) | 170          | 10.2                                     | 1.96 |
| 7     | Na <sub>2</sub> CO <sub>3</sub> | DMAP (10%) | 200          | 19.2                                     | 1.85 |
| 8     | Li <sub>2</sub> CO <sub>3</sub> | DMAP (10%) | 200          | 15.2                                     | 1.85 |
| 9     | Na <sub>2</sub> CO <sub>3</sub> | DMAP (10%) | 220          | 13.8                                     | 1.95 |

<sup>a</sup>The reaction was carried out with 2.5 mmol **a** (1.00 equiv) and **b** (1.01 equiv) in 5 mL of solvent in the presence of 2.2 equiv of base for 6 h. *T*, External temperature. *M*<sub>n</sub><sup>PS</sup>, number-average molecular weight with polystyrene as standard. PDI, polydispersity index.

From the results above we found that the reaction of **a** and **b** resulted in a relative lower *M*<sub>n</sub> of the **P1**, though catalyst (DMAP) was added and the reaction temperature was increased. Thus, in our study, PSAs were synthesized through the nucleophilic polycondensation between aryl phenols and alkylsulfamoyl fluorides.

#### 3.2 Synthesis of PSAs from diverse building blocks

##### 3.2.1 Synthesis of alkylsulfamoyl fluorides<sup>3</sup>

In a 500 mL round-bottom flask equipped with a stir bar, the secondary amines (100 mmol, 1 eq.) was dissolved in 100 mL dichloromethane (DCM). Triethylamine (300 mmol, 3 eq.) and DMAP (100 mmol, 1 eq.) were added and the resulting solution was stirred at room temperature for 5 mins. The flask was charged with gentle vacuum, then quickly filled with SO<sub>2</sub>F<sub>2</sub> gas *via* a syringe attached balloon. The reaction was allowed stirring at room temperature until the full conversion of starting compound to target bisfluorosulfate, monitored by TLC. DCM was then evaporated away on rotary evaporator, the resulting crude product was dissolved in 100 mL

ethyl acetate (EtOAc). It was subsequently washed with 50 mL aqueous HCl (1.0 M, 3 times), 50 mL saturated aqueous solution of NaHCO<sub>3</sub>, then 50 mL saturated brine. The organic phase was dried over anhydrous Na<sub>2</sub>SO<sub>4</sub>. After filtration, the removal of EtOAc gave alkylsulfamoyl fluorides as white solid, which was further purified through column chromatography (silica gel 200-300 mesh size) using *n*-hexanes/EtOAc = 50:1-10:1 as eluent.

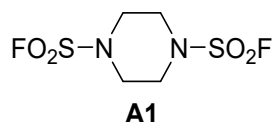

**piperazine-1,4-disulfonyl difluoride (A1)**, white solid, 96% yield. <sup>1</sup>H NMR (400 MHz, Chloroform-*d*) δ 3.65 (t, *J* = 1.2 Hz, 8H). <sup>13</sup>C NMR (100 MHz, DMSO-*d*<sub>6</sub>) δ 46.1. <sup>19</sup>F NMR (376 MHz, DMSO-*d*<sub>6</sub>) δ 42.57.

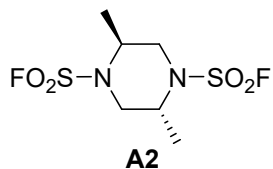

**(2S,5R)-2,5-dimethylpiperazine-1,4-disulfonyl difluoride (A2)**, white solid, 92% yield. <sup>1</sup>H NMR (500 MHz, Chloroform-*d*) δ 4.25-4.20 (m, 2H), 3.54-3.51 (m, 4H), 1.37 (d, *J* = 6.9 Hz, 6H). <sup>13</sup>C NMR (125 MHz, Chloroform-*d*) δ 49.3, 44.4, 12.6. <sup>19</sup>F NMR (376 MHz, Chloroform-*d*) δ 48.53.

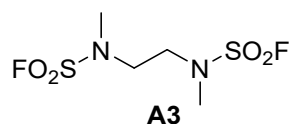

**ethane-1,2-diylbis(methylsulfamoyl fluoride) (A3)**, white solid, 96% yield. <sup>1</sup>H NMR (400 MHz, Chloroform-*d*) δ 3.60 (t, *J* = 1.2 Hz, 4H), 3.14 (s, 6H). <sup>13</sup>C NMR (100 MHz, Chloroform-*d*) δ 47.7, 35.7. <sup>19</sup>F NMR (376 MHz, Chloroform-*d*) δ 49.84.

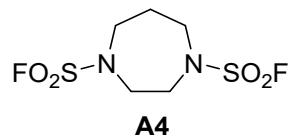

**1,4-diazepane-1,4-disulfonyl difluoride (A4)**, white solid, 94% yield. <sup>1</sup>H NMR (400 MHz, Chloroform-*d*) δ 3.77-3.70 (m, 8H), 2.19-2.12 (m, 2H). <sup>13</sup>C NMR (100 MHz, DMSO-*d*<sub>6</sub>) δ 45.9, 43.8, 22.7. <sup>19</sup>F NMR (376 MHz, Chloroform-*d*) δ 49.85 (d, *J* = 6.7 Hz).

### 3.2.2 Synthesis of PSAs<sup>4,5</sup>

General procedure: Aryl phenols (2.50 mmol, 1.0 eq) and alkylsulfamoyl fluorides (2.55 mol, 1.02 eq) were combined in a 25 mL glass vial equipped with magnetic stir bar. Sulfolane (5.0 mL) was added, and the vial was placed into a pre-heated 150°C oil bath with stirring. After 2

min, commercially available anhydrous  $K_2CO_3$  (2.2 eq) was added in one portion. The reaction was run for 6 hours, during which course the reaction mixture turned highly viscous while the moisture appeared. At the end of the reaction, it was allowed to cool to  $70^\circ\text{C}$  and the mixture was slowly poured into 50 mL of cold water under vigorous stirring. Polymers precipitated as white fiber or powder once the sulfolane solution touched the water. The polymers were collected via filtration and then refluxed in water for 1 h to remove the salts and sulfolane. Finally, the polymers were dried at  $40^\circ\text{C}$  for 12 hours in vacuo. Molecular weight and polymer distribution were determined on GPC. The thermal properties were determined by DSC and TGA analysis.

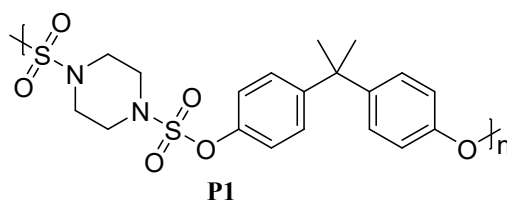

**P1**, White fiber, 95% yield.  $^1\text{H}$  NMR (500 MHz,  $\text{DMSO-}d_6$ )  $\delta$  7.26-7.20 (m, 8H), 3.41 (s, 8H), 1.58 (s, 6H).  $^{13}\text{C}$  NMR (125 MHz,  $\text{DMSO-}d_6$ )  $\delta$  149.3, 147.9, 128.6, 121.8, 46.2, 42.7, 30.8.  $M_n^{\text{PS}} = 155$  kDa, PDI = 1.65,  $T_g$  (DSC) =  $147.2^\circ\text{C}$ ,  $T_d$  (5% weight loss, TGA) =  $339.5^\circ\text{C}$

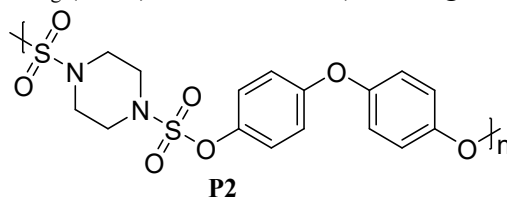

**P2**, White fiber, 96% yield.  $^1\text{H}$  NMR (400 MHz,  $\text{DMSO-}d_6$ )  $\delta$  7.37 (d,  $J = 8.4$  Hz, 4H), 7.10 (d,  $J = 8.6$  Hz, 4H), 3.45 (s, 8H).  $^{13}\text{C}$  NMR (100 MHz,  $\text{DMSO-}d_6$ )  $\delta$  155.4, 145.6, 124.1, 120.5, 46.4.  $M_n^{\text{PS}} = 110$  kDa, PDI = 1.56,  $T_g$  (DSC) =  $129.9^\circ\text{C}$ ,  $T_d$  (5% weight loss, TGA) =  $341.3^\circ\text{C}$ .

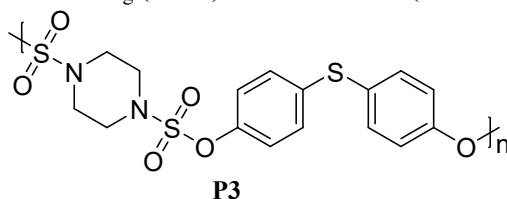

**P3**, White fiber, 96% yield.  $^1\text{H}$  NMR (400 MHz,  $\text{DMSO-}d_6$ )  $\delta$  7.42 (d,  $J = 8.6$  Hz, 4H), 7.36 (d,  $J = 8.4$  Hz, 4H), 3.45 (s, 8H).  $^{13}\text{C}$  NMR (100 MHz,  $\text{DMSO-}d_6$ )  $\delta$  149.3, 133.8, 132.9, 123.6, 46.4.  $M_n^{\text{PS}} = 90$  kDa, PDI = 1.41,  $T_g$  (DSC) =  $128.3^\circ\text{C}$ ,  $T_d$  (5% weight loss, TGA) =  $336.3^\circ\text{C}$ .

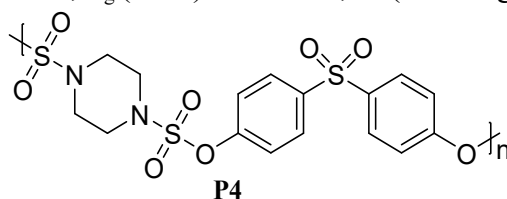

**P4**, White fiber, 95% yield.  $^1\text{H}$  NMR (400 MHz,  $\text{DMSO-}d_6$ )  $\delta$  8.11 (d,  $J = 8.8$  Hz, 4H), 7.60 (d,  $J = 8.5$  Hz, 4H), 3.50 (s, 8H).  $^{13}\text{C}$  NMR (100 MHz,  $\text{DMSO-}d_6$ )  $\delta$  153.7, 139.5, 130.6, 123.5, 46.3.  $M_n^{\text{PS}} = 13$  kDa, PDI = 1.36,  $T_g$  (DSC) =  $174.9^\circ\text{C}$ ,  $T_d$  (5% weight loss, TGA) =  $322.6^\circ\text{C}$ .

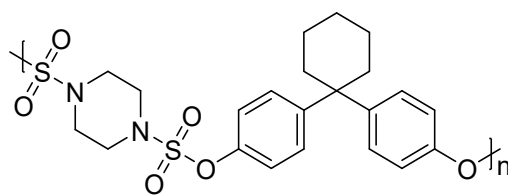

**P5**

**P5**, White fiber, 97% yield.  $^1\text{H NMR}$  (400 MHz,  $\text{DMSO-}d_6$ )  $\delta$  7.34 (d,  $J = 8.5$  Hz, 4H), 7.21 (d,  $J = 8.4$  Hz, 4H), 3.38 (s, 8H), 2.22-2.17 (m, 4H), 1.40-1.36 (m, 6H).  $^{13}\text{C NMR}$  (100 MHz,  $\text{DMSO-}d_6$ )  $\delta$  147.6, 147.3, 129.0, 121.9, 46.2, 45.8, 36.6, 26.0, 22.8.  $M_n^{\text{PS}} = 60$  kDa, PDI = 1.34,  $T_g$  (DSC) = 215.1°C,  $T_d$  (5% weight loss, TGA) = 356.6°C.

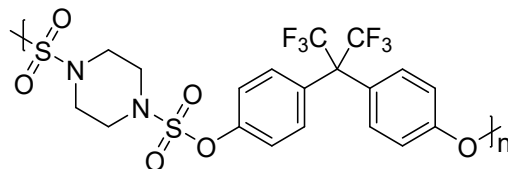

**P6**

**P6**, White fiber, 96% yield.  $^1\text{H NMR}$  (500 MHz,  $\text{DMSO-}d_6$ )  $\delta$  7.54 (d,  $J = 8.9$  Hz, 4H), 7.49 (d,  $J = 8.5$  Hz, 4H), 3.56 (s, 8H).  $^{13}\text{C NMR}$  (125 MHz,  $\text{DMSO-}d_6$ )  $\delta$  150.6, 132.1, 131.1, 125.3 (q,  $J = 3.5$  Hz, 1C), 123.1-122.7 (m, 1C), 122.5, 46.3.  $M_n^{\text{PS}} = 67$  kDa, PDI = 1.71,  $T_g$  (DSC) = 152.9°C,  $T_d$  (5% weight loss, TGA) = 374.9°C.

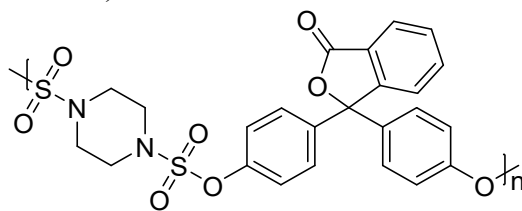

**P7**

**P7**, White fiber, 95% yield.  $^1\text{H NMR}$  (400 MHz,  $\text{DMSO-}d_6$ )  $\delta$  7.90 (t,  $J = 9.0$  Hz, 2H), 7.81 (t,  $J = 7.6$  Hz, 1H), 7.65 (t,  $J = 7.4$  Hz, 1H), 7.38 (d,  $J = 8.7$  Hz, 4H), 7.33 (d,  $J = 8.5$  Hz, 4H), 3.41 (s, 8H).  $^{13}\text{C NMR}$  (100 MHz,  $\text{DMSO-}d_6$ )  $\delta$  168.9, 151.2, 150.0, 139.6, 135.8, 130.8, 129.1, 126.3, 125.0, 124.6, 122.6, 122.0, 121.1, 90.2, 46.3.  $M_n^{\text{PS}} = 45$  kDa, PDI = 1.27,  $T_g$  (DSC) = 221.2°C,  $T_d$  (5% weight loss, TGA) = 359.1°C.

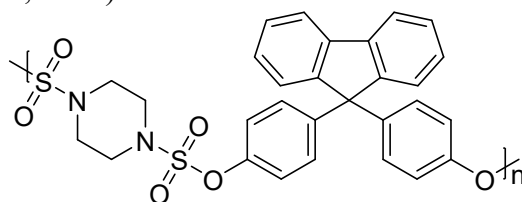

**P8**

**P8**, White fiber, 97% yield.  $^1\text{H NMR}$  (400 MHz,  $\text{DMSO-}d_6$ )  $\delta$  7.85 (d,  $J = 7.6$  Hz, 2H), 7.38-7.32 (m, 4H), 7.25-7.12 (m, 10H), 3.34 (s, 8H).  $^{13}\text{C NMR}$  (100 MHz,  $\text{DMSO-}d_6$ )  $\delta$  150.2, 148.7, 144.7, 139.9, 129.6, 128.6, 126.3, 122.1, 121.2, 64.4, 46.1.  $M_n^{\text{PS}} = 140$  kDa, PDI = 1.69,  $T_g$  (DSC) = 234.8°C,  $T_d$  (5% weight loss, TGA) = 360.5°C.

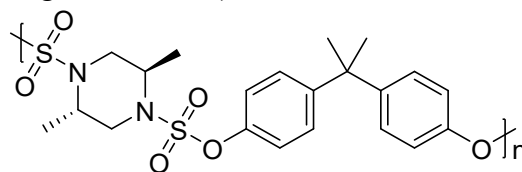

**P9**

**P9**, White fiber, 97% yield.  $^1\text{H NMR}$  (400 MHz,  $\text{DMSO-}d_6$ )  $\delta$  7.27 (d,  $J = 8.3$  Hz, 4H), 7.20 (d,  $J = 8.4$  Hz, 4H), 4.23-4.13 (m, 2H), 3.50-3.43 (m, 4H), 1.61 (s, 6H), 1.10 (d,  $J = 6.5$  Hz, 6H).

$^{13}\text{C}$  NMR (100 MHz, DMSO- $d_6$ )  $\delta$  149.3, 148.0, 128.6, 121.6, 50.1, 45.6, 42.7, 30.8, 13.6.  $M_n^{\text{PS}}$  = 42 kDa, PDI = 1.50,  $T_g$  (DSC) = 153.9°C,  $T_d$  (5% weight loss, TGA) = 344.6°C.

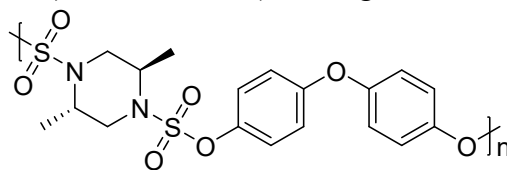

**P10**

**P10**, White fiber, 95% yield.  $^1\text{H}$  NMR (500 MHz, DMSO- $d_6$ )  $\delta$  7.33 (d,  $J$  = 8.5 Hz, 4H), 7.10 (d,  $J$  = 8.4 Hz, 4H), 4.21-4.17 (m, 2H), 3.55-3.44 (m, 4H), 1.22-1.19 (m, 6H).  $^{13}\text{C}$  NMR (125 MHz, DMSO- $d_6$ )  $\delta$  155.4, 145.7, 124.0, 120.4, 50.2, 45.7, 13.8.  $M_n^{\text{PS}}$  = 85 kDa, PDI = 1.64,  $T_g$  (DSC) = 136.7°C,  $T_d$  (5% weight loss, TGA) = 329.7°C.

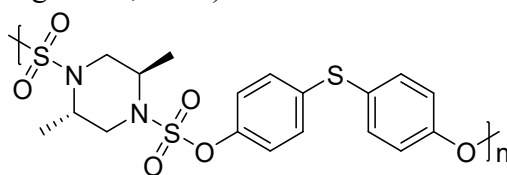

**P11**

**P11**, White fiber, 92% yield.  $^1\text{H}$  NMR (400 MHz, DMSO- $d_6$ )  $\delta$  7.42 (d,  $J$  = 8.2 Hz, 4H), 7.32 (d,  $J$  = 8.4 Hz, 4H), 4.21-4.15 (m, 2H), 3.56-3.44 (m, 4H), 1.19 (d,  $J$  = 6.8 Hz, 6H).  $^{13}\text{C}$  NMR (100 MHz, DMSO- $d_6$ )  $\delta$  149.5, 133.8, 133.0, 123.4, 50.2, 45.7, 13.7.  $M_n^{\text{PS}}$  = 34 kDa, PDI = 1.57,  $T_g$  (DSC) = 126.5°C,  $T_d$  (5% weight loss, TGA) = 327.2°C.

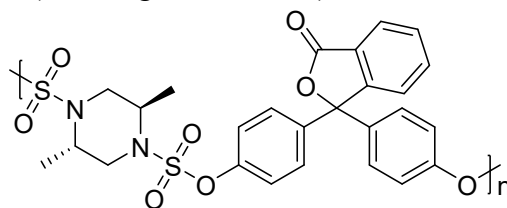

**P12**

**P12**, White fiber, 95% yield.  $^1\text{H}$  NMR (400 MHz, DMSO- $d_6$ )  $\delta$  8.00-7.95 (m, 2H), 7.91 (d,  $J$  = 7.6 Hz, 1H), 7.72 (t,  $J$  = 7.5 Hz, 1H), 7.47 (d,  $J$  = 8.5 Hz, 4H), 7.38 (d,  $J$  = 8.5 Hz, 4H), 4.22-4.19 (m, 2H), 3.58-3.54 (m, 4H), 1.17 (d,  $J$  = 5.2 Hz, 6H).  $^{13}\text{C}$  NMR (125 MHz, DMSO- $d_6$ )  $\delta$  168.9, 164.3, 151.2, 150.1, 139.6, 135.8, 130.8, 129.0, 126.3, 125.0, 124.6, 122.4, 90.2, 50.2, 45.7, 13.6.  $M_n^{\text{PS}}$  = 96 kDa, PDI = 1.50,  $T_g$  (DSC) = 224.2°C,  $T_d$  (5% weight loss, TGA) = 309.7°C.

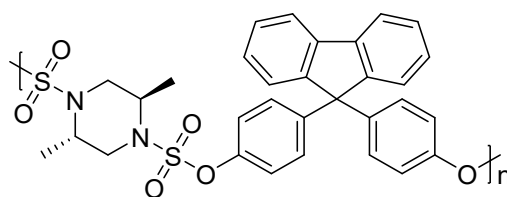

**P13**

**P13**, White fiber, 97% yield.  $^1\text{H}$  NMR (400 MHz, DMSO- $d_6$ )  $\delta$  7.88 (d,  $J$  = 7.7 Hz, 2H), 7.41-7.34 (m, 4H), 7.31-7.16 (m, 10H), 4.10-4.05 (m, 2H), 3.48-3.45 (m, 4H), 1.06-1.01 (m, 6H).  $^{13}\text{C}$  NMR (100 MHz, DMSO- $d_6$ )  $\delta$  150.3, 148.9, 144.6, 139.9, 129.7, 128.6, 126.3, 122.1, 121.2, 64.5, 50.1, 45.6, 13.5.  $M_n^{\text{PS}}$  = 35 kDa, PDI = 1.50,  $T_g$  (DSC) = 232.6°C,  $T_d$  (5% weight loss, TGA) = 346.8°C.

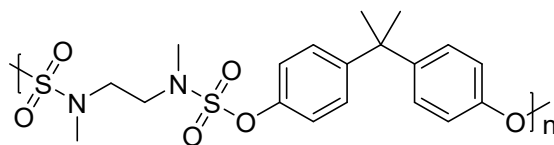

**P14**

**P14**, White fiber, 95% yield. <sup>1</sup>H NMR (500 MHz, DMSO-*d*<sub>6</sub>) δ 7.24 (d, *J* = 8.5 Hz, 4H), 7.18 (d, *J* = 8.1 Hz, 4H), 3.33 (s, 4H), 2.88 (s, 6H), 1.58 (s, 6H). <sup>13</sup>C NMR (125 MHz, DMSO-*d*<sub>6</sub>) δ 149.2, 148.0, 128.5, 121.9, 48.4, 42.6, 36.1, 30.8. *M<sub>n</sub><sup>PS</sup>* = 64 kDa, PDI = 1.46, *T<sub>g</sub>* (DSC) = 88.6°C, *T<sub>d</sub>* (5% weight loss, TGA) = 337.3°C.

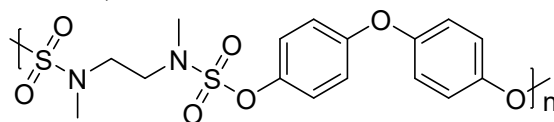

**P15**

**P15**, White fiber, 95% yield. <sup>1</sup>H NMR (400 MHz, DMSO-*d*<sub>6</sub>) δ 7.32 (d, *J* = 7.7 Hz, 4H), 7.10 (d, *J* = 7.8 Hz, 4H), 3.47-3.44 (m, 4H), 2.93 (s, 6H). <sup>13</sup>C NMR (100 MHz, DMSO-*d*<sub>6</sub>) δ 155.4, 145.7, 124.2, 120.4, 48.6, 36.3. *M<sub>n</sub><sup>PS</sup>* = 81 kDa, PDI = 1.53, *T<sub>g</sub>* (DSC) = 74.4°C, *T<sub>d</sub>* (5% weight loss, TGA) = 290.8°C.

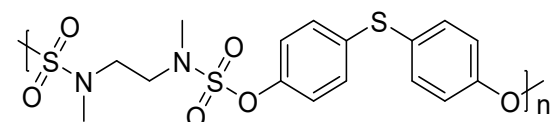

**P16**

**P16**, White fiber, 96% yield. <sup>1</sup>H NMR (500 MHz, DMSO-*d*<sub>6</sub>) δ 7.41 (d, *J* = 8.0 Hz, 4H), 7.33 (d, *J* = 8.0 Hz, 4H), 3.45-3.42 (m, 4H), 2.94 (s, 6H). <sup>13</sup>C NMR (125 MHz, DMSO-*d*<sub>6</sub>) δ 149.4, 133.7, 132.8, 123.7, 48.6, 36.2. *M<sub>n</sub><sup>PS</sup>* = 63 kDa, PDI = 1.61, *T<sub>g</sub>* (DSC) = 72.3°C, *T<sub>d</sub>* (5% weight loss, TGA) = 308.7°C.

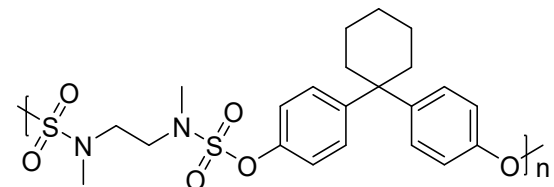

**P17**

**P17**, White fiber, 98% yield. <sup>1</sup>H NMR (500 MHz, DMSO-*d*<sub>6</sub>) δ 7.35 (d, *J* = 8.4 Hz, 4H), 7.19 (d, *J* = 8.3 Hz, 4H), 3.31 (s, 4H), 2.86 (s, 6H), 2.21 (s, 4H), 1.40 (s, 6H). <sup>13</sup>C NMR (125 MHz, DMSO-*d*<sub>6</sub>) δ 147.7, 147.2, 128.9, 122.1, 48.4, 45.8, 36.7, 36.2, 26.0, 22.9. *M<sub>n</sub><sup>PS</sup>* = 103 kDa, PDI = 1.61, *T<sub>g</sub>* (DSC) = 102.2°C, *T<sub>d</sub>* (5% weight loss, TGA) = 341.7°C.

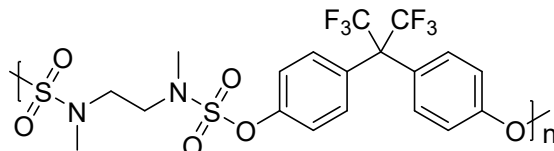

**P18**

**P18**, White fiber, 96% yield. <sup>1</sup>H NMR (500 MHz, DMSO-*d*<sub>6</sub>) δ 7.45 (s, 8H), 3.46 (s, 4H), 2.97 (s, 6H). <sup>13</sup>C NMR (125 MHz, DMSO-*d*<sub>6</sub>) δ 150.69, 132.0, 125.3 (q, *J* = 3.5 Hz, 1C), 123.1-122.8 (m, 1C), 122.7, 122.6, 48.7, 36.2. *M<sub>n</sub><sup>PS</sup>* = 120 kDa, PDI = 1.57, *T<sub>g</sub>* (DSC) = 96.5°C, *T<sub>d</sub>* (5% weight loss, TGA) = 335.7°C.

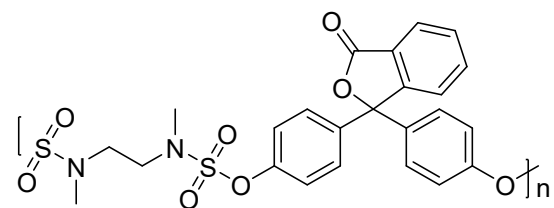

**P19**

**P19**, White fiber, 98% yield.  $^1\text{H}$  NMR (400 MHz,  $\text{DMSO-}d_6$ )  $\delta$  7.97-7.92 (m, 2H), 7.86 (t,  $J = 7.7$  Hz, 1H), 7.69 (t,  $J = 7.5$  Hz, 1H), 7.42 (d,  $J = 8.6$  Hz, 4H), 7.35 (d,  $J = 8.4$  Hz, 4H), 3.46-3.43 (m, 6H), 2.91 (s, 6H).  $^{13}\text{C}$  NMR (125 MHz,  $\text{DMSO-}d_6$ )  $\delta$  168.9, 151.3, 150.1, 139.5, 135.8, 130.8, 129.0, 126.3, 125.0, 124.6, 122.7, 90.3, 48.5, 36.2.  $M_n^{\text{PS}} = 47$  kDa, PDI = 1.41,  $T_g$  (DSC) = 141.9°C,  $T_d$  (5% weight loss, TGA) = 351.9°C.

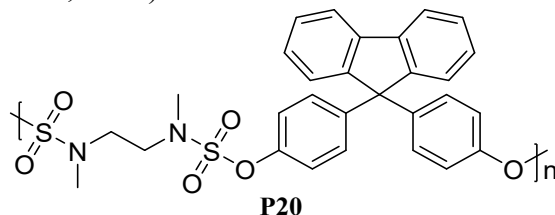

**P20**, White fiber, 96% yield.  $^1\text{H}$  NMR (500 MHz,  $\text{DMSO-}d_6$ )  $\delta$  7.92 (d,  $J = 7.6$  Hz, 2H), 7.44-7.37 (m, 4H), 7.29 (t,  $J = 7.4$  Hz, 2H), 7.21-7.17 (m, 8H), 3.49-3.41 (m, 4H), 2.87 (s, 6H).  $^{13}\text{C}$  NMR (125 MHz,  $\text{DMSO-}d_6$ )  $\delta$  150.3, 148.9, 144.6, 139.9, 129.6, 128.6, 126.4, 122.3, 64.5, 48.4, 36.1.  $M_n^{\text{PS}} = 72$  kDa, PDI = 1.45,  $T_g$  (DSC) = 171.2°C,  $T_d$  (5% weight loss, TGA) = 351.7°C.

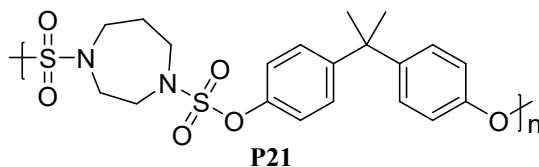

**P21**, White fiber, 98% yield.  $^1\text{H}$  NMR (500 MHz,  $\text{DMSO-}d_6$ )  $\delta$  7.32 (d,  $J = 8.4$  Hz, 4H), 7.25 (d,  $J = 8.4$  Hz, 4H), 3.55-3.49 (m, 8H), 1.86-1.82 (m, 2H), 1.67 (s, 6H).  $^{13}\text{C}$  NMR (100 MHz,  $\text{DMSO-}d_6$ )  $\delta$  149.2, 147.91, 128.5, 121.9, 49.9, 48.4, 42.7, 30.8, 28.9.  $M_n^{\text{PS}} = 64$  kDa, PDI = 1.52,  $T_g$  (DSC) = 112.0°C,  $T_d$  (5% weight loss, TGA) = 342.8°C.

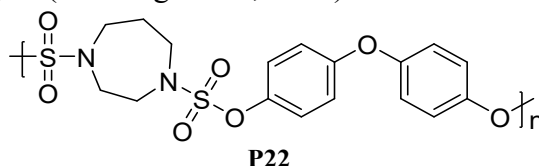

**P22**, White fiber, 98% yield.  $^1\text{H}$  NMR (500 MHz,  $\text{DMSO-}d_6$ )  $\delta$  7.34 (d,  $J = 8.5$  Hz, 4H), 7.10 (d,  $J = 8.6$  Hz, 4H), 3.51-3.46 (m, 8H), 1.86-1.81 (m, 2H).  $^{13}\text{C}$  NMR (125 MHz,  $\text{DMSO-}d_6$ )  $\delta$  155.4, 145.6, 124.3, 120.4, 50.0, 48.5, 29.0.  $M_n^{\text{PS}} = 44$  kDa, PDI = 1.51,  $T_g$  (DSC) = 97.8°C,  $T_d$  (5% weight loss, TGA) = 317.4°C.

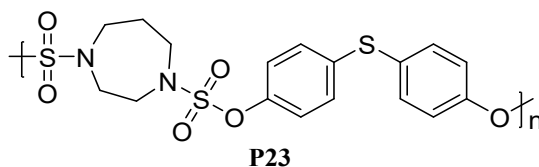

**P23**, White fiber, 95% yield.  $^1\text{H}$  NMR (400 MHz,  $\text{DMSO-}d_6$ )  $\delta$  7.48-7.45 (m, 4H), 7.38 (d,  $J = 8.4$  Hz, 4H), 3.59-3.51 (m, 8H), 1.94-1.86 (m, 2H).  $^{13}\text{C}$  NMR (125 MHz,  $\text{DMSO-}d_6$ )  $\delta$  155.5, 145.7, 124.4, 120.3, 50.2, 48.7, 29.1.  $M_n^{\text{PS}} = 37$  kDa, PDI = 1.71,  $T_g$  (DSC) = 94.2°C,  $T_d$  (5% weight loss, TGA) = 337.2°C.

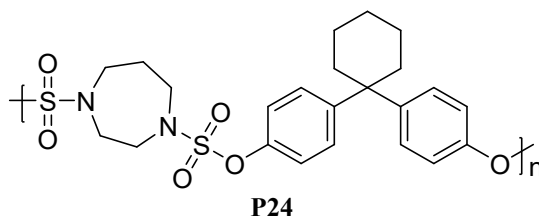

**P24**, White fiber, 95% yield.  $^1\text{H}$  NMR (500 MHz,  $\text{DMSO-}d_6$ )  $\delta$  7.33 (d,  $J = 8.3$  Hz, 4H), 7.18 (d,  $J = 8.2$  Hz, 4H), 3.47-3.43 (m, 8H), 2.20 (s, 4H), 1.74-1.70 (m, 2H), 1.43-1.38 (m, 6H).  $^{13}\text{C}$



NMR (125 MHz, DMSO- $d_6$ )  $\delta$  158.2, 147.7, 128.9, 122.0, 49.8, 48.4, 45.8, 36.7, 28.8, 26.0, 22.6.  $M_n^{PS}$  = 37 kDa, PDI = 1.51,  $T_g$  (DSC) = 127.4°C,  $T_d$  (5% weight loss, TGA) = 328.0°C.

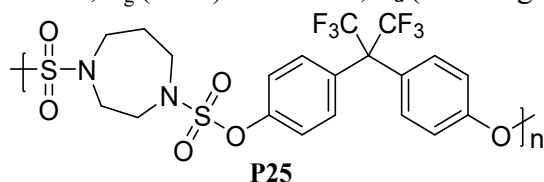

**P25**, White fiber, 94% yield.  $^1\text{H}$  NMR (400 MHz, DMSO- $d_6$ )  $\delta$  7.48-7.45 (m, 8H), 3.62-3.54 (m, 8H), 1.90-1.84 (m, 2H).  $^{13}\text{C}$  NMR (100 MHz, DMSO- $d_6$ )  $\delta$  150.6, 132.1, 131.1, 125.7 (q,  $J$  = 3.5 Hz, 1C), 122.7, 122.6, 49.8, 48.5, 28.8.  $M_n^{PS}$  = 66 kDa, PDI = 1.44,  $T_g$  (DSC) = 122.2°C,  $T_d$  (5% weight loss, TGA) = 336.2°C.

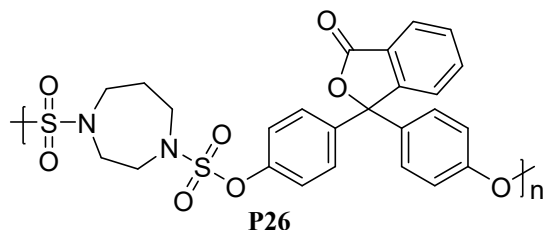

**P26**, White fiber, 97% yield.  $^1\text{H}$  NMR (400 MHz, DMSO- $d_6$ )  $\delta$  7.96-7.91 (m, 2H), 7.88-7.82 (m, 1H), 7.69 (t,  $J$  = 7.4 Hz, 1H), 7.41 (d,  $J$  = 8.5 Hz, 4H), 7.34 (d,  $J$  = 8.7 Hz, 4H), 3.52-3.45 (m, 8H), 1.81 (q,  $J$  = 6.3 Hz, 2H).  $^{13}\text{C}$  NMR (100 MHz, DMSO- $d_6$ )  $\delta$  168.9, 151.3, 150.1, 139.6, 135.8, 130.8, 129.0, 126.3, 125.0, 124.6, 122.8, 90.3, 49.8, 48.5, 28.9.  $M_n^{PS}$  = 40 kDa, PDI = 1.38,  $T_g$  (DSC) = 148.2°C,  $T_d$  (5% weight loss, TGA) = 347.2°C.

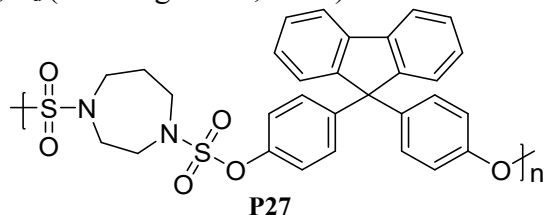

**P27**, White fiber, 95% yield.  $^1\text{H}$  NMR (400 MHz, DMSO- $d_6$ )  $\delta$  7.90 (d,  $J$  = 7.6 Hz, 2H), 7.42-7.35 (m, 4H), 7.27 (t,  $J$  = 7.1 Hz, 2H), 7.19-7.13 (m, 8H), 3.48-3.44 (m, 8H), 1.74-1.70 (m, 2H).  $^{13}\text{C}$  NMR (125 MHz, DMSO- $d_6$ )  $\delta$  150.3, 148.8, 144.6, 139.9, 129.6, 128.6, 126.4, 122.3, 121.2, 64.5, 49.8.  $M_n^{PS}$  = 32 kDa, PDI = 1.59,  $T_g$  (DSC) = 184.4°C,  $T_d$  (5% weight loss, TGA) = 350.8°C.

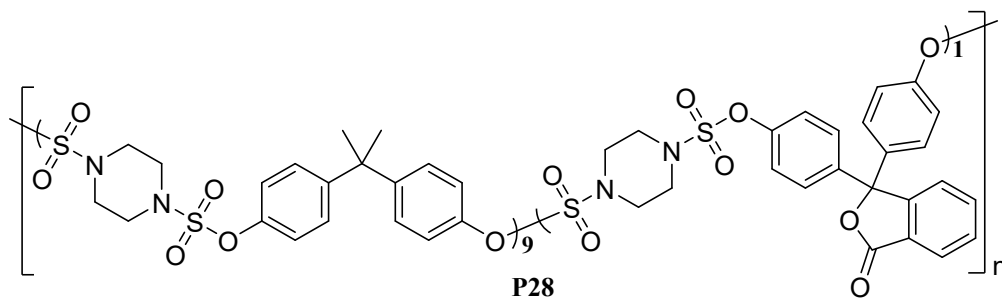

**P28**, White fiber, 98% yield.  $^1\text{H}$  NMR (400 MHz, DMSO- $d_6$ )  $\delta$  7.31-7.21 (m, 84H), 3.41 (s, 80H), 1.59 (s, 54H).  $^{13}\text{C}$  NMR (125 MHz, DMSO- $d_6$ )  $\delta$  150.3, 149.3, 149.1, 148.3, 147.8, 142.7, 129.4, 129.0, 128.6, 121.9, 121.8, 121.7, 121.1, 121.0, 46.2, 42.6, 30.7.  $M_n^{PS}$  = 167 kDa, PDI = 1.60,  $T_g$  (DSC) = 148.6°C,  $T_d$  (5% weight loss, TGA) = 357.0°C.

### 3.3. Hundred gram-scale synthesis of P1

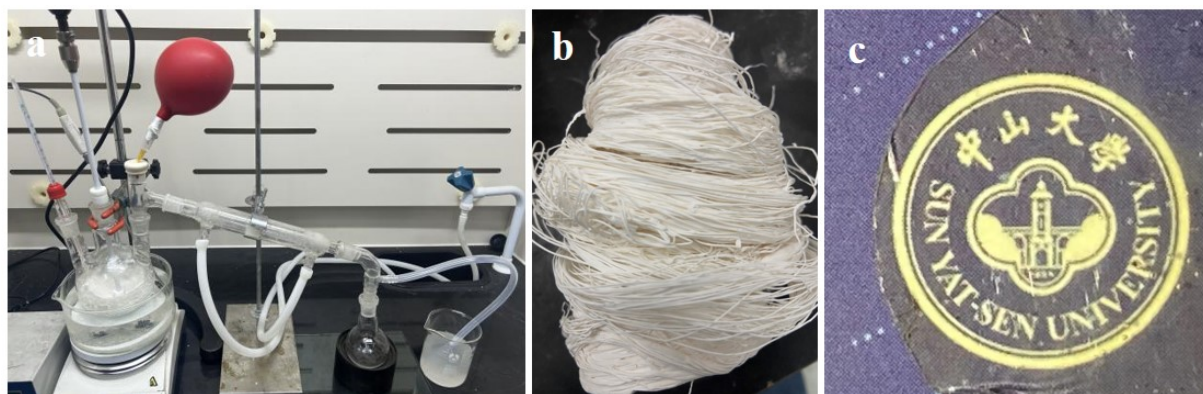

**Fig. S1 Hundred gram-scale synthesis of P1**

The scaled-up reaction was carried out under the optimal reaction conditions with 0.25 mol of A1 (62.5 g) and B1 (57.1 g) in 250 mL sulfolane. Mechanical agitation was applied for the vast and viscous reaction mixture (Fig. S1a), in a 500 mL glass vial equipped with a distillation apparatus to collect the produced water and a balloon to collect the produced CO<sub>2</sub>. The vial was placed into a pre-heated 150°C oil bath. After 2 min, commercially available anhydrous K<sub>2</sub>CO<sub>3</sub> (2.2 eq.) was added in one portion. The reaction was run for 6 h, during which course the reaction mixture turned highly viscous as moisture appeared, and the balloon was inflated as well. At the end of the reaction, it was allowed to cool to 70°C, and the mixture was slowly poured into 500 mL of water under vigorous stirring. Polymers precipitated as white fibers once the sulfolane solution touched the water (Fig. S1b). The polymer P1 was collected via filtration and pulverized, then refluxed in water for 1 h to remove the salts and sulfolane. Finally, the polymers were dried at 40 °C for 12 hours in vacuo. In addition, P1 could be prepared as transparent and flexible thin sample (Fig. S1c).

## 4. Characterization of the polymers

### 4.1 Molecular weight and polymer dispersity index of polymers

The molecular weight and polymer dispersity index were measured using a gel permeation chromatography (GPC) system (EliteHPLC P3100, China) equipped with an Agilent PL1100-6500 column and a SHIMADZU RID-20A detector. During the test, the column temperature was maintained at 40°C. The GPC analysis was conducted using chromatographic-grade N, N-dimethylformamide (DMF) as the solvent, with a sample concentration of 1.5 mg/mL, a flow rate of 1.0 mL/min, and an injection volume of 20 μL. Polystyrene standards from the American Polymer Standards Corporation were used for calibration.

## 4.2 Thermal properties of polymers

Thermogravimetric analysis (TGA) was conducted using a TGA Q50 instrument (TA Instruments, USA) to evaluate the thermal stability of the polymer. Approximately 5–10 mg of each sample was heated from 30°C to 600°C at a heating rate of 10°C/min under a nitrogen flow of 20 mL/min. The temperature corresponding to 5% weight loss ( $T_d$ , 5% weight loss) was used as the criterion for assessing the polymer's thermal stability (Fig. S2).

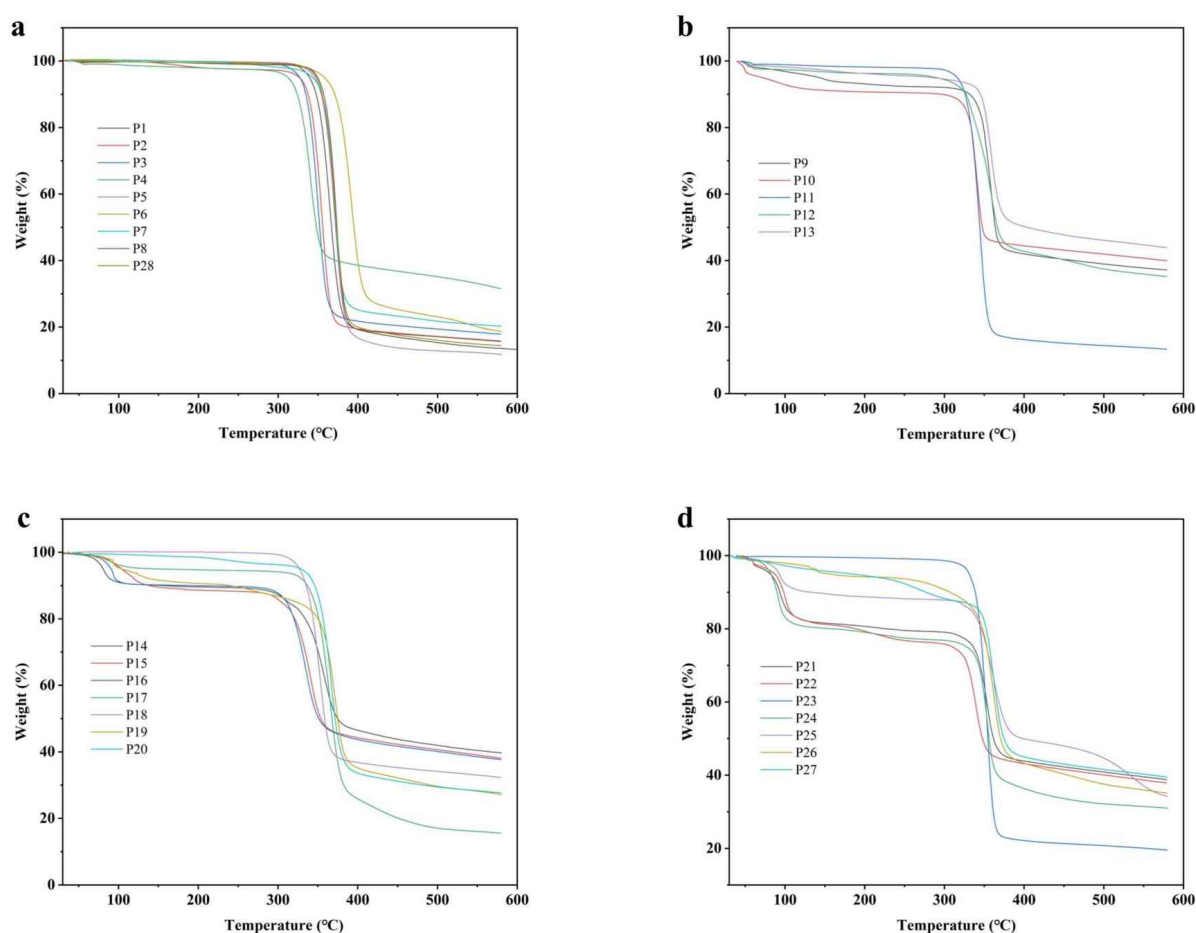

**Fig. S2** The thermal gravity analysis (TGA) curves of PSAs

Differential scanning calorimetry (DSC) was conducted using a DSC 3500 instrument (Netzsch, Germany) to investigate the thermal properties of the samples. Approximately 5–10 mg of each sample was analyzed. The procedure included an initial heating from 25°C to 250°C at 10°C/min, followed by cooling to 25°C at the same rate, and a subsequent reheating to 250°C under a nitrogen flow of 40 mL/min. The second heating scan was utilized to evaluate the material's intrinsic thermal properties and the reversibility of changes observed in the first scan, as the initial heating removed the effects of thermal history and physical aging. Data analysis was performed using Netzsch Universal Analysis software.

### 4.3 Mechanical properties of polymers

Flexural and tensile specimens were molded using a plastics injection machine (UN-120SK, Yizumi, China), and tests were conducted using a universal testing machine (LD23.104, Lishi (Shanghai) Instruments Co., Ltd., China) at room temperature. Tensile test specimens were dumbbell-shaped (specimen type 1A) with an initial grip distance of 115 mm, a narrow portion width of 10 mm, and a thickness of 4 mm, in accordance with ISO 527-2:2012. Tensile tests were performed at a speed of 10 mm/min. Flexural test specimens measured 80 × 10 × 4 mm, and flexural properties were evaluated using the same testing machine, following ISO 178:2010, with a crosshead speed of 2 mm/min. Izod impact strength was measured at room temperature using a 2.75 J pendulum in accordance with ASTM D256. For each test, five specimens were analyzed, and the mean values of the results are presented in the results section.

**Table S3.** Mechanical properties of **P1**

| Tensile strength (MPa) | Elastic modulus (MPa) | Flexural strength (MPa) | Flexural modulus (MPa) | Breaking elongation (%) | Notch impact strength (kJ/m <sup>2</sup> ) |
|------------------------|-----------------------|-------------------------|------------------------|-------------------------|--------------------------------------------|
| 75                     | 3500                  | 94                      | 3531                   | 3-5                     | 3                                          |

P1 with  $M_n^{PS} = 155$  kDa was applied.

**Table S4.** Mechanical properties of **P1** with different molecular weights

| polymer | Tensile strength (MPa) | Elastic modulus (MPa) | Flexural strength (MPa) | Flexural modulus (MPa) |
|---------|------------------------|-----------------------|-------------------------|------------------------|
| P1      | 75                     | 3500                  | 94                      | 3531                   |
| P1-1    | 72.4                   | 3332                  | 92.8                    | 3398                   |

P1 with  $M_n^{PS} = 155$  kDa, P1-1 with  $M_n^{PS} = 67$  kDa was applied.

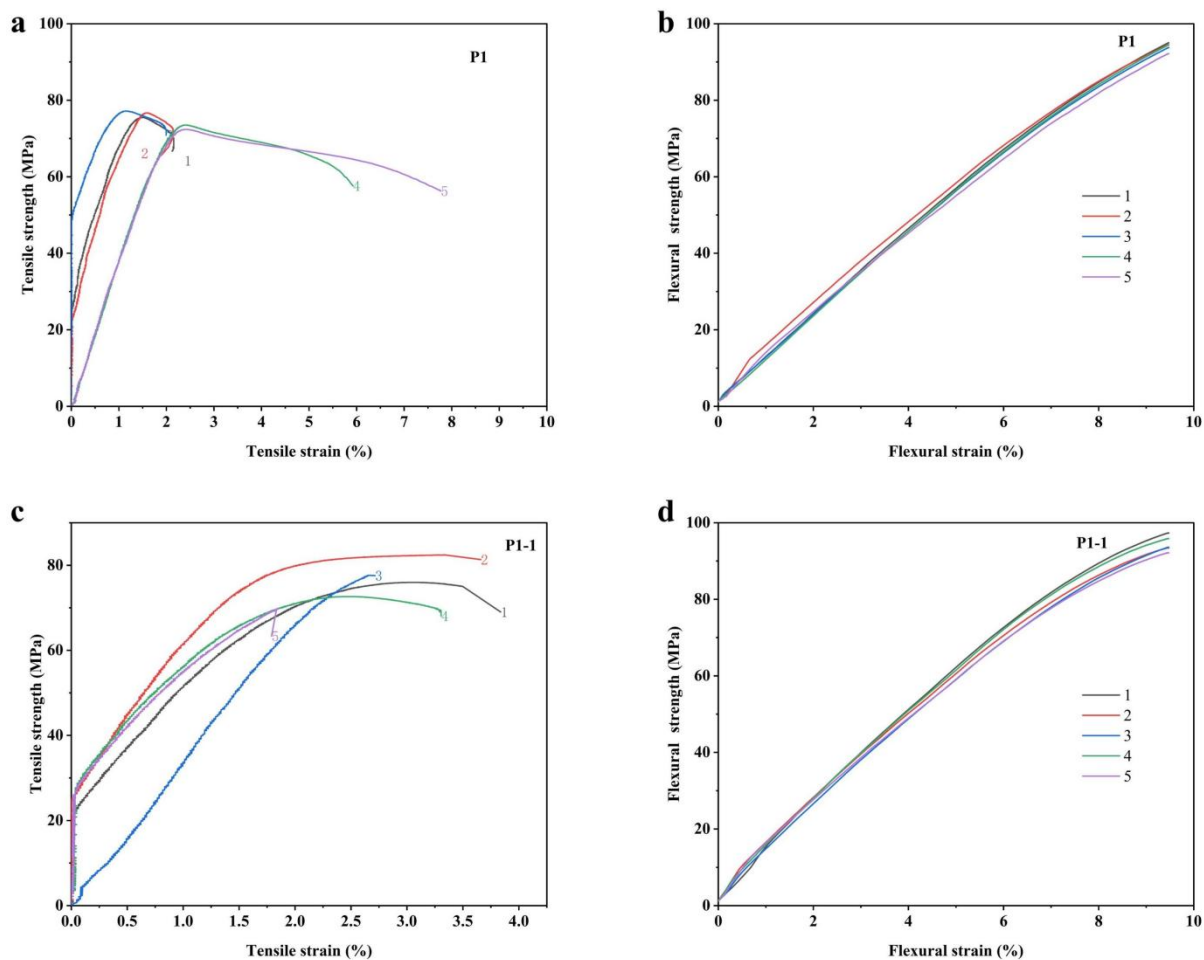

**Fig. S3** The tensile and flexural tests of P1 with different molecular weights (P1 with  $M_n^{PS} = 155$  kDa, P1-1 with  $M_n^{PS} = 67$  kDa)

**Table S5.** Mechanical properties of P9 with different molecular weights

| polymer | Tensile strength<br>(MPa) | Elastic modulus<br>(MPa) | Flexural strength<br>(MPa) | Flexural modulus<br>(MPa) |
|---------|---------------------------|--------------------------|----------------------------|---------------------------|
| P9      | 77                        | 3600                     | 98                         | 3560                      |
| P9-1    | 79                        | 3760                     | 98                         | 3576                      |

P9 with  $M_n^{PS} = 42$  kDa, P9-1 with  $M_n^{PS} = 71$  kDa was applied.

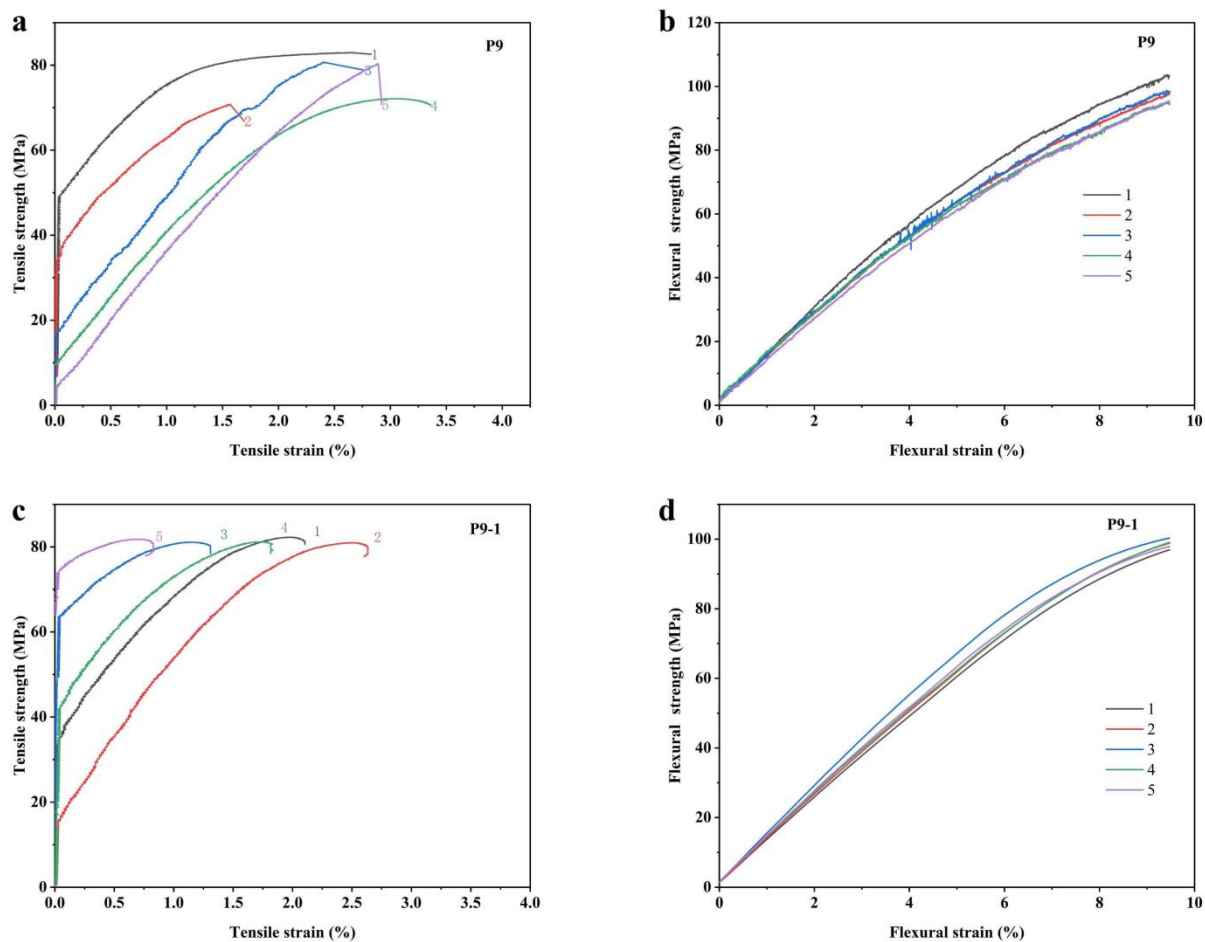

**Fig. S4** The tensile and flexural tests of P9 with different molecular weights (P9 with  $M_n^{PS} = 42$  kDa, P9-1 with  $M_n^{PS} = 71$  kDa)

**Table S6.** Mechanical properties of P14 with different molecular weights

| polymer | Tensile strength<br>(MPa) | Elastic modulus<br>(MPa) | Flexural strength<br>(MPa) | Flexural modulus<br>(MPa) |
|---------|---------------------------|--------------------------|----------------------------|---------------------------|
| P14     | 55                        | 2300                     | 75                         | 2500                      |
| P14-1   | 60                        | 2760                     | 82                         | 2975                      |

P14 with  $M_n^{PS} = 64$  kDa, P14-1 with  $M_n^{PS} = 183$  kDa was applied.

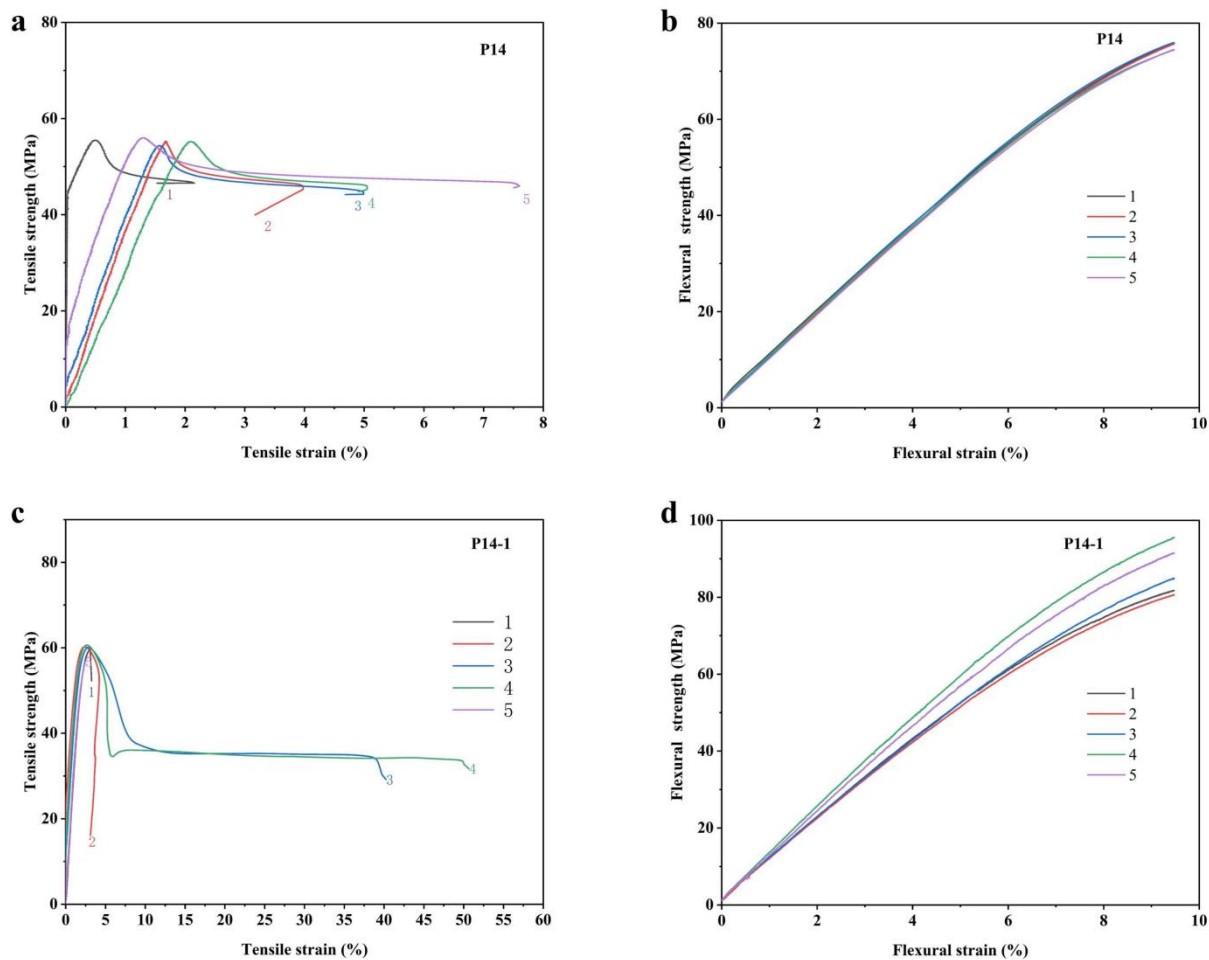

**Fig. S5** The tensile and flexural tests of P14 with different molecular weights (P14 with  $M_n$

$^{PS} = 64$  kDa, P14-1 with  $M_n^{PS} = 183$  kDa)

**Table S7.** Mechanical properties of **P21** with different molecular weights

| polymer | Tensile strength<br>(MPa) | Elastic modulus<br>(MPa) | Flexural strength<br>(MPa) | Flexural modulus<br>(MPa) |
|---------|---------------------------|--------------------------|----------------------------|---------------------------|
| P21     | 71                        | 3500                     | 91                         | 3500                      |
| P21-1   | 73                        | 3620                     | 92                         | 3525                      |

P21 with  $M_n^{PS} = 64$  kDa, P21-1 with  $M_n^{PS} = 119$  kDa was applied.

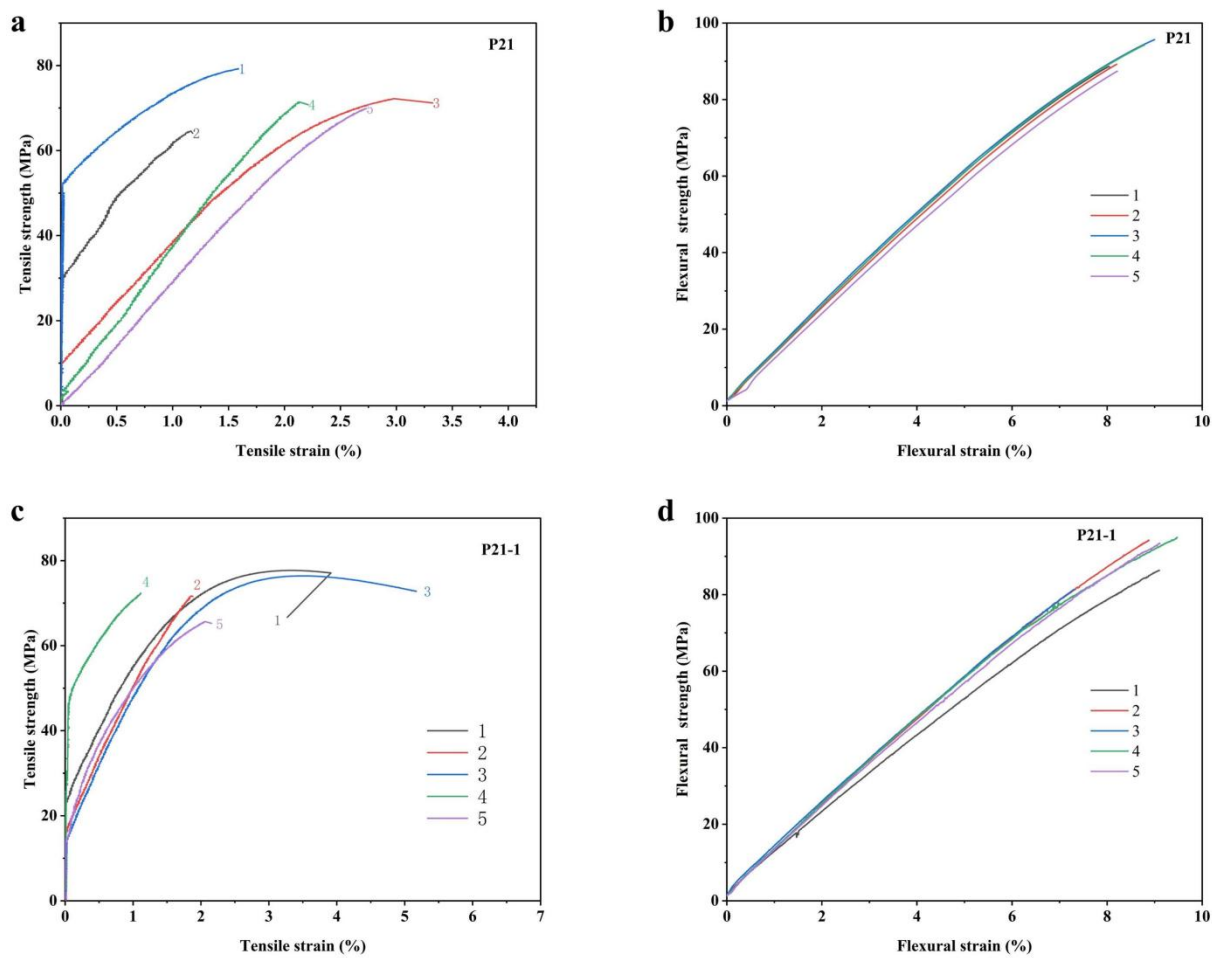

**Fig. S6** The tensile and flexural tests of P21 with different molecular weights (P21 with  $M_n^{PS} = 64$  kDa, P21-1 with  $M_n^{PS} = 119$  kDa)

**Table S8.** Mechanical properties of PA 6

| polymer | Tensile strength (MPa) | Elastic modulus (MPa) | Flexural strength (MPa) | Flexural modulus (MPa) |
|---------|------------------------|-----------------------|-------------------------|------------------------|
| PA 6    | 60                     | 2300                  | 65                      | 2340                   |

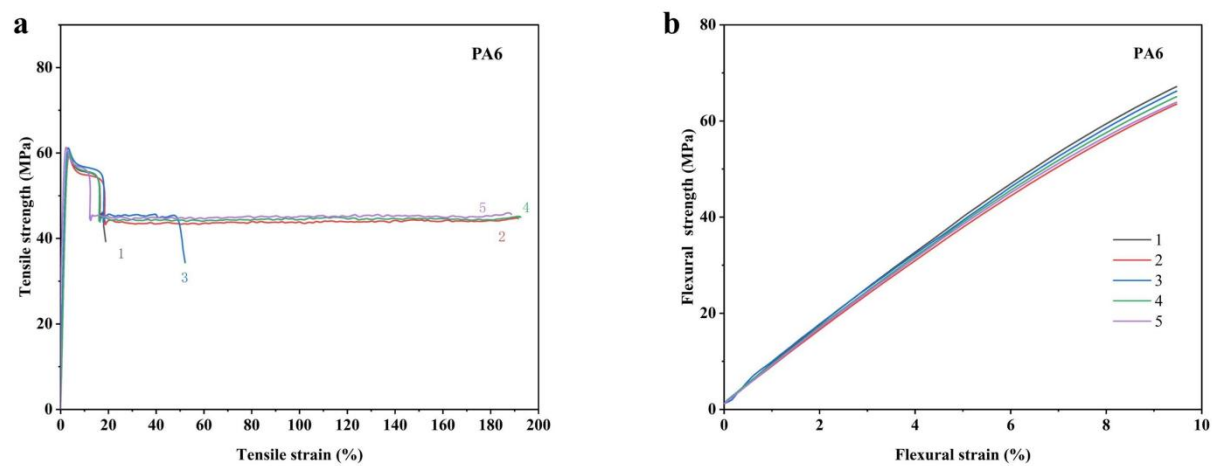

**Fig. S7** The tensile and flexural tests of PA 6



## 4.4 Solvent-stability of P1

**Table S9.** Solvent-stability of **P1**

| Entry | Reagents (solvents)      | Reagents concentration (%) | Weight change (%) | Notes  |
|-------|--------------------------|----------------------------|-------------------|--------|
| 1     | water                    | 100                        | 0.5               | stable |
| 2     | MeOH                     | 100                        | 0.1               | stable |
| 3     | EtOH                     | 100                        | 0.1               | stable |
| 4     | <i>n</i> -butanol        | 100                        | 0.1               | stable |
| 5     | HCl                      | 20                         | 0.2               | stable |
| 6     | HNO <sub>3</sub>         | 68                         | 0.1               | stable |
| 7     | HNO <sub>3</sub>         | 40                         | 0.1               | stable |
| 8     | HNO <sub>3</sub>         | 20                         | 0.2               | stable |
| 9     | KOH                      | 35                         | 0.1               | stable |
| 10    | KOH                      | 20                         | 0.2               | stable |
| 11    | Acetone/H <sub>2</sub> O | 5                          | 0.2               | stable |
| 12    | Acetic acid              | 99.5                       | 0.1               | stable |
| 13    | <i>n</i> -hexane         | 100                        | 0.1               | stable |
| 14    | <i>n</i> -heptane        | 100                        | 0.2               | stable |
| 15    | ethylene glycol          | 100                        | 0.1               | stable |
| 16    | Hydrofluoric acid        | 48                         | 0.2               | stable |

Note: The solvent stability experiments were measured by placing 5.4±0.2 g of **P1** (thicker samples after processing, 80\*10\*4 mm) into 200 ml solvent for 7days at 25 °C. Each group was run for 5 times and we took the average. **P1** with  $M_n^{PS} = 150$  kDa was applied.

## 5. Industrial production of PSA

### 5.1 Industrial production of P1

The 100 kg-scale **P1** was produced in Inner Mongolia Tuwei new material Technology Co., LTD. Generally, under N<sub>2</sub> atmosphere, **A1** (70.78 kg) and BPA (64 kg) were dissolved in sulfolane (450 kg) in 1000 L steel reactor. And K<sub>2</sub>CO<sub>3</sub> (85.23 kg) was added (within 30 min) to the reaction mixture when the temperature was raised to 170°C. The moisture was removed by N<sub>2</sub> and collected by condensing. After reaction, the crude product **P1** was post-processed including granulating, washing, removing of salts, solvent recovery and drying. The obtained **P1** was used without other modifications of processing (Fig. S8).

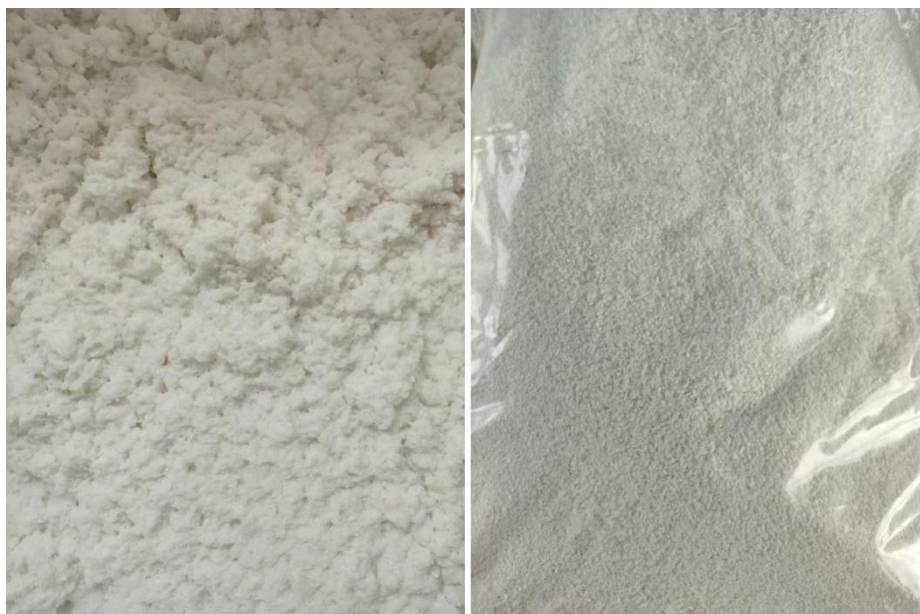

Fig. S8 Industrial products of P1

## 5.2 Mechanical properties of industrial products of P1

Table S10. Mechanical properties of industrial products of P1

| polymer | Tensile strength<br>(MPa) | Elastic modulus<br>(MPa) | Flexural strength<br>(MPa) | Flexural modulus<br>(MPa) |
|---------|---------------------------|--------------------------|----------------------------|---------------------------|
| P1      | 72                        | 3300                     | 92                         | 3400                      |

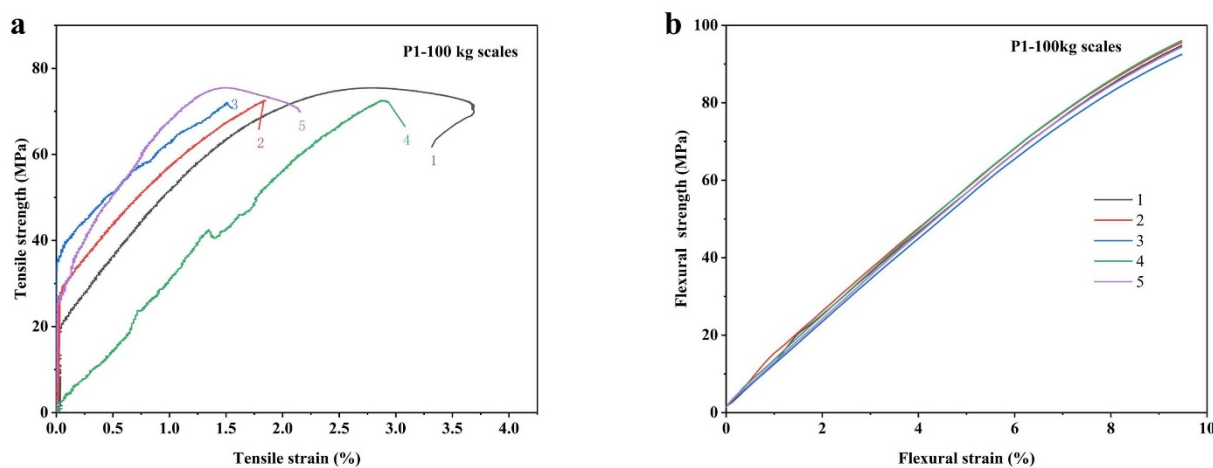

Fig. S9 The tensile and flexural tests of industrial products of P1 ( $M_n^{PS} = 110$  kDa, PDI = 1.61)

## 6. References

1. Mahapatra, S. et al. SuFEx activation with  $\text{Ca}(\text{NTf}_2)_2$ : a unified strategy to access sulfamides, sulfamates, and sulfonamides from S(VI) fluorides. *Org. Lett.* **22**, 4389–4394 (2020).

- Gao, B. et al. SuFEx chemistry of thionyl tetrafluoride (SO<sub>2</sub>F<sub>4</sub>) with organolithium nucleophiles: Synthesis of sulfonimidoyl fluorides, sulfoximines, sulfonimidamides and sulfonimidates. *Angew. Chem., Int. Ed. Engl.* 130, 1957–1961 (2018).
- Dong, J. J., Krasnova, L., Finn, M. G., & Sharpless, K. B. Sulfur (VI) fluoride exchange (SuFEx): Another good reaction for click chemistry. *Angew. Chem., Int. Ed. Engl.* 53, 9430–9448 (2014).
- Zhu, W. W. et al. Nucleophilic construction of sulfate bonds: simplified access to polysulfates and polysulfonates. *React. Chem. Eng.* 4, 2074–2080 (2019).
- Gao, B. et al. Bifluoride-catalysed sulfur (VI) fluoride exchange reaction for the synthesis of polysulfates and polysulfonates. *Nat. Chem.* 9, 1083–1088 (2017).
- Kato, Y. et al. Measurements of the Hansen solubility parameters of mites and cockroaches to improve pest control applications. *Heliyon* 5, e01853 (2019).
- Hansen, C. M. Hansen Solubility Parameters: A User's Handbook; CRC Press, 1999.
- Petersen, J. B. et al. Hansen solubility parameters of surfactant-capped silver nanoparticles for ink and printing technologies. *Langmuir* 30, 15514–15519 (2014).
- Bongiardina, N. J., Sinha, J. & Bowman, C. N. Flory–Huggins parameters for thiol-ene networks using Hansen solubility parameters. *Macromolecules* 54, 11439–11448 (2021).
- Lindvig, T., Michelsen, M. L. & Kontogeorgis, G. M. A Flory-Huggins model based on the Hansen solubility parameters. *Fluid Phase Equilib.* 203, 247–260 (2002).
- Bagley, E. B., Nelson, T. P. & Scigliano, J. M. Three-dimensional solubility parameters and their relationship to internal pressure measurements in polar and hydrogen bonding solvents. *J. Paint Technol.* 43, 35–42 (1971).
- Wei, J. et al. Synthesis and characterization of flat-sheet thin film composite forward osmosis membranes. *J. Membr. Sci.* 372, 292–302 (2011)
- Sabde, A. D. et al. Casting and characterization of cellulose acetate butyrate based UF membranes. *Desalination* 114, 223–232 (1997).
- Zhou, J. Y. et al. Ultralow Ti<sub>3</sub>C<sub>2</sub>TX doping polysulfate membrane for high ultrafiltration performance. *J. Membr. Sci.* 637, 119603 (2021).
- Zhao, S. et al. Performance improvement of polysulfone ultrafiltration membrane using well-dispersed polyaniline–poly(vinylpyrrolidone) nanocomposite as the additive. *Ind. Eng. Chem. Res.* 51, 4661–4672 (2012).
- Yang, Q., Chung, T. S., & Santoso, Y. E. Tailoring pore size and pore size distribution of kidney dialysis hollow fiber membranes via dual-bath coagulation approach. *J. Membr. Sci.* 290, 153–163 (2007).

17. Yang, Q., Chung, T. S., Chen, S. B., & Weber, M. Pioneering explorations of rooting causes for morphology and performance differences in hollow fiber kidney dialysis membranes spun from linear and hyperbranched polyethersulfone. *J. Membr. Sci.* 313, 190–198 (2008).
18. Meireles, M. et al. An appropriate molecular size parameter for porous membranes calibration. *J. Membr. Sci.* 103, 105–115 (1995).
19. Xiang, S. et al. Fabrication of PVDF/EVOH blend hollow fiber membranes with hydrophilic property via thermally induced phase process. *Sep. Purif. Technol.* 301, 122031 (2022).

## 7. Copies of the NMR spectra and DSC curve of new compounds

### 7.1 Copies of the NMR spectra of monomers

#### <sup>1</sup>H NMR of 1a

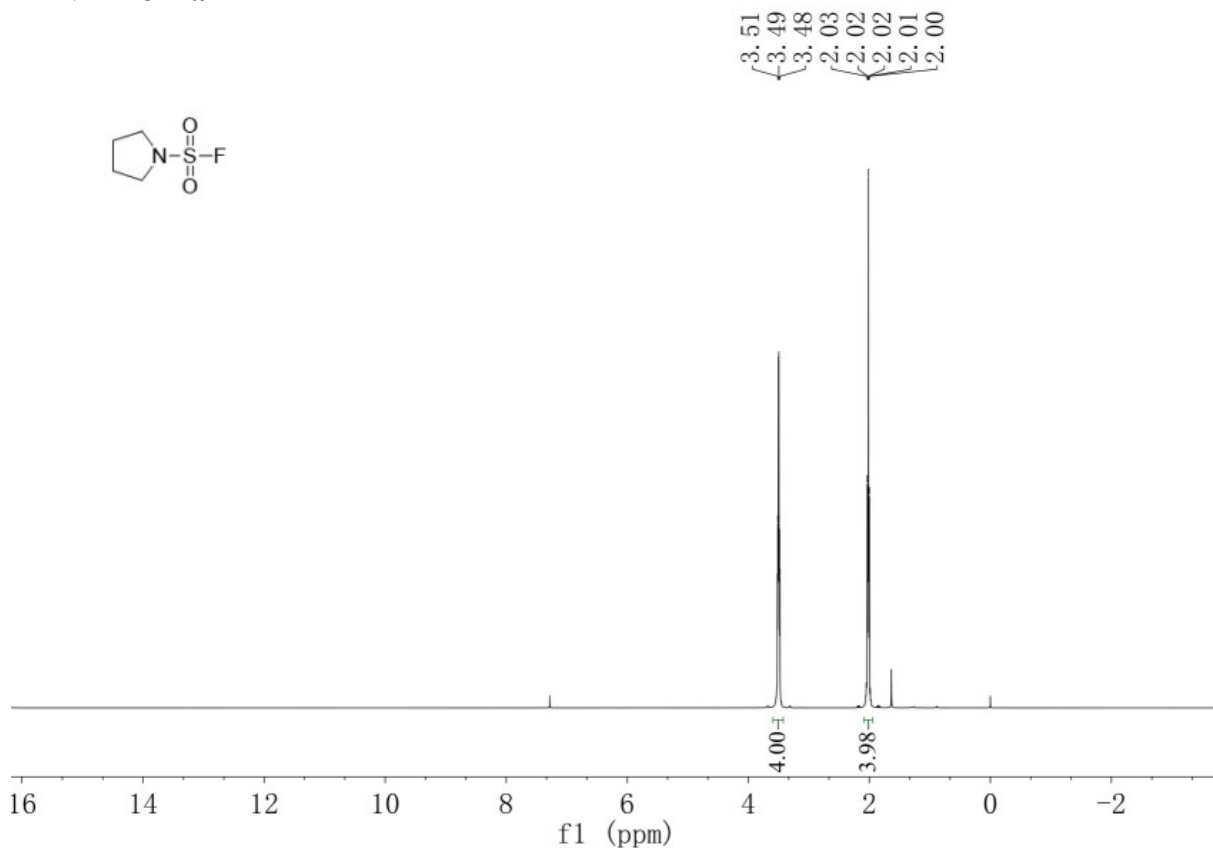

#### <sup>13</sup>C NMR of 1a

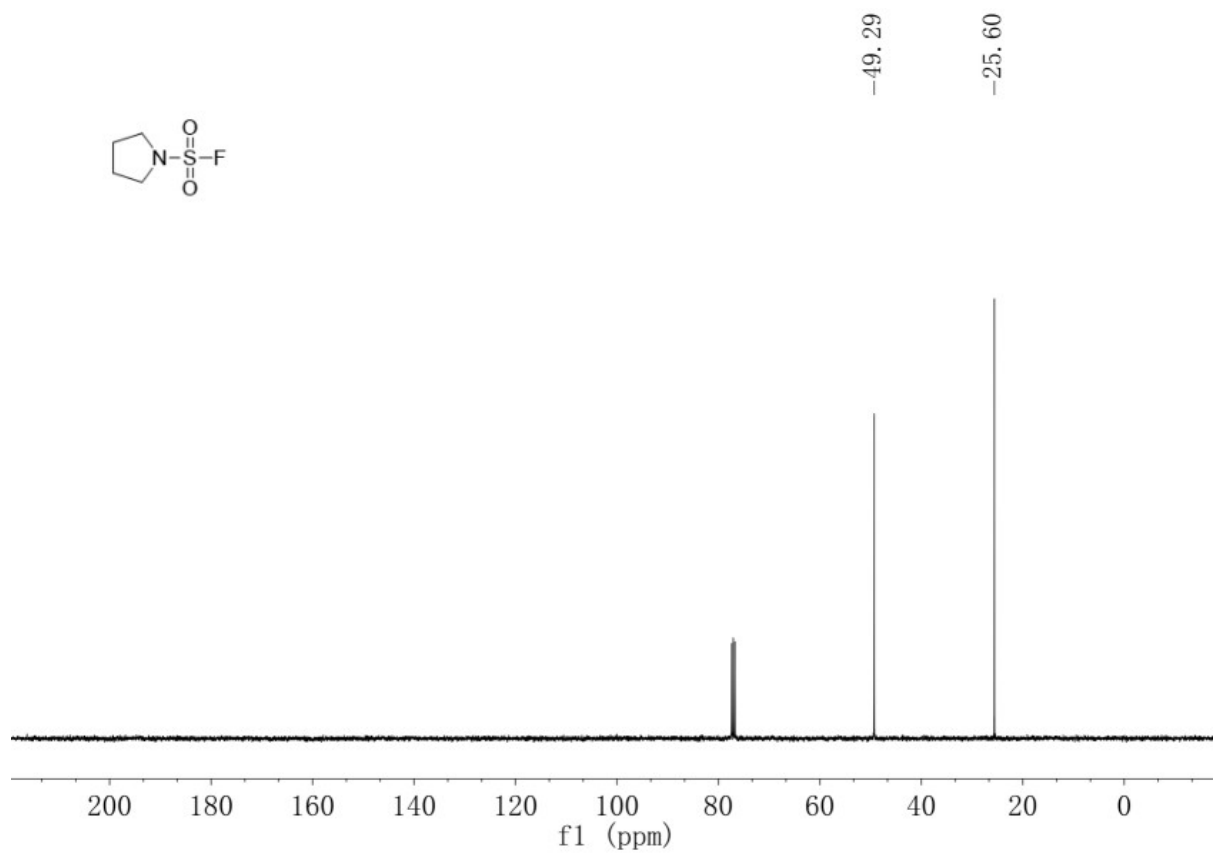

**<sup>19</sup>F NMR of 1a**

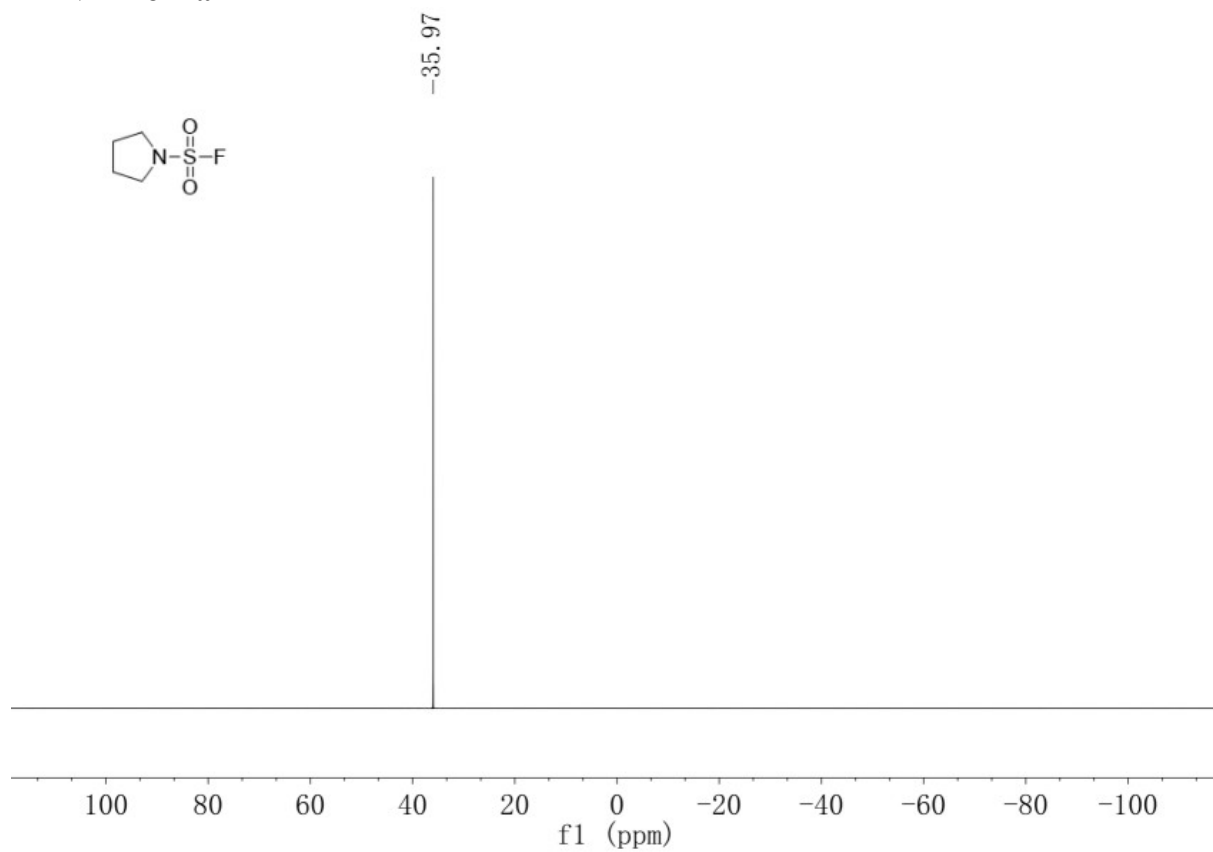

**<sup>1</sup>H NMR of 1b**

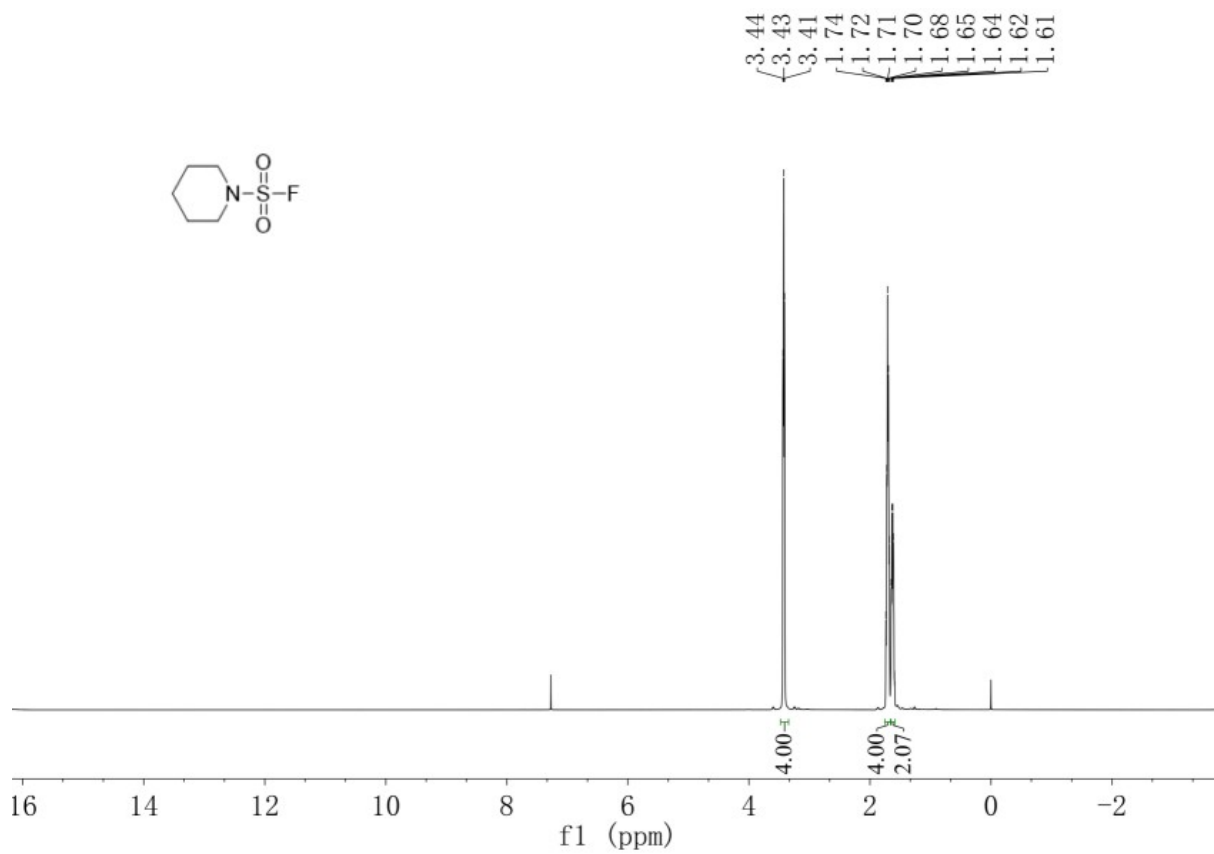

**<sup>13</sup>C NMR of 1b**

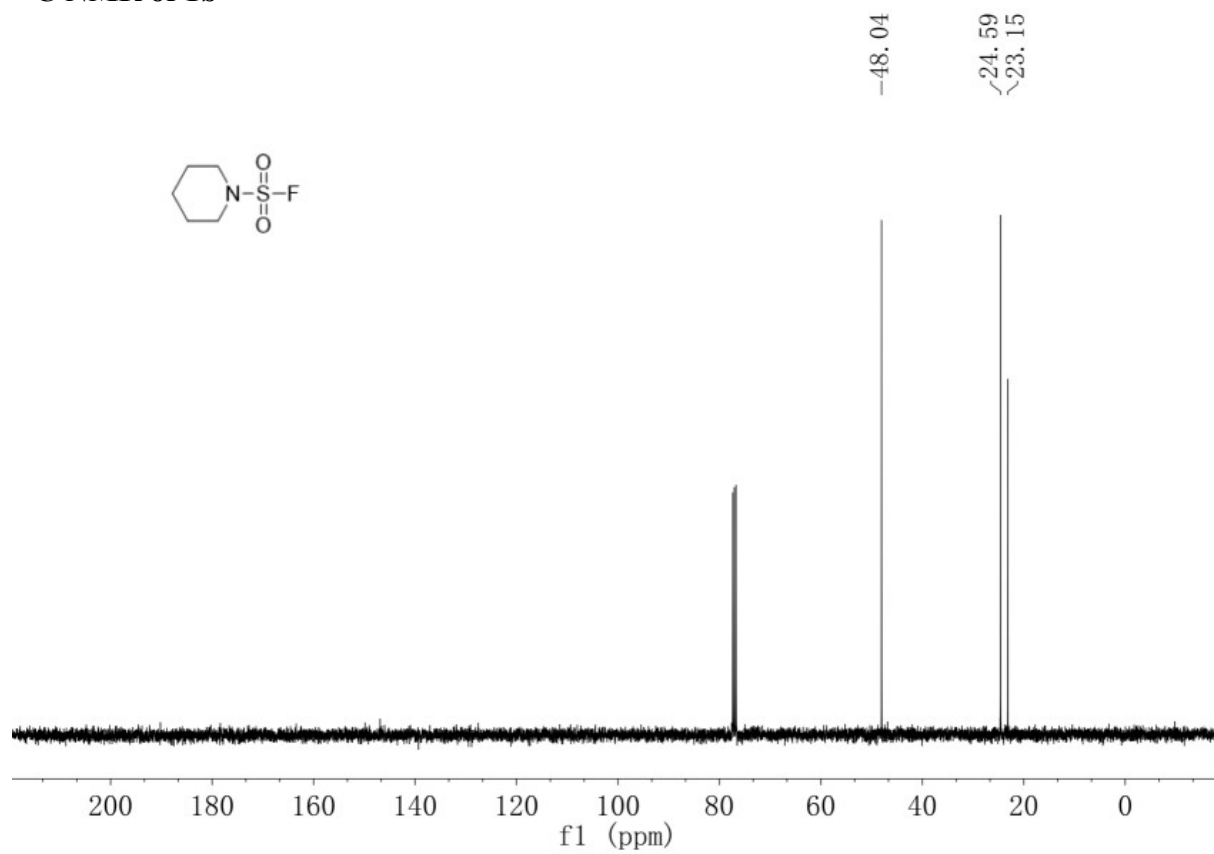

### <sup>19</sup>F NMR of 1b

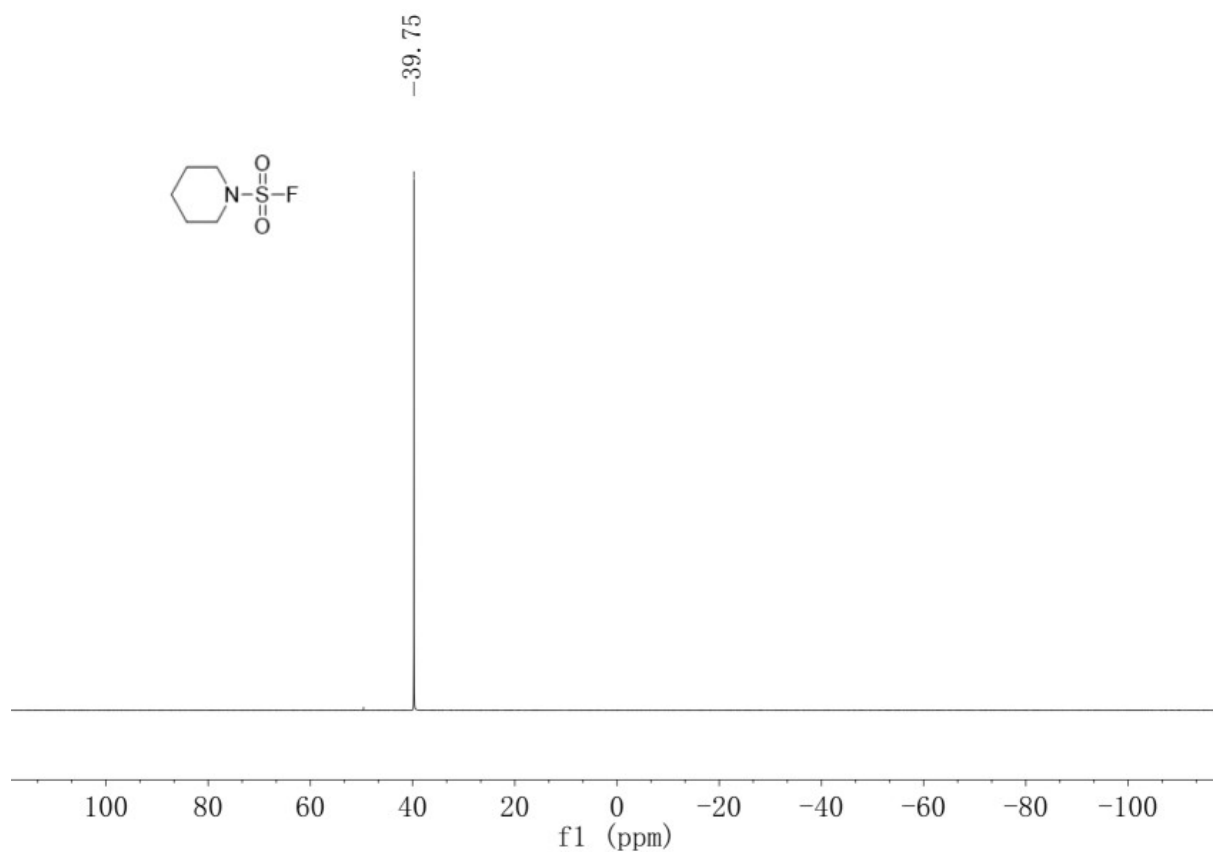

### <sup>1</sup>H NMR of 3a

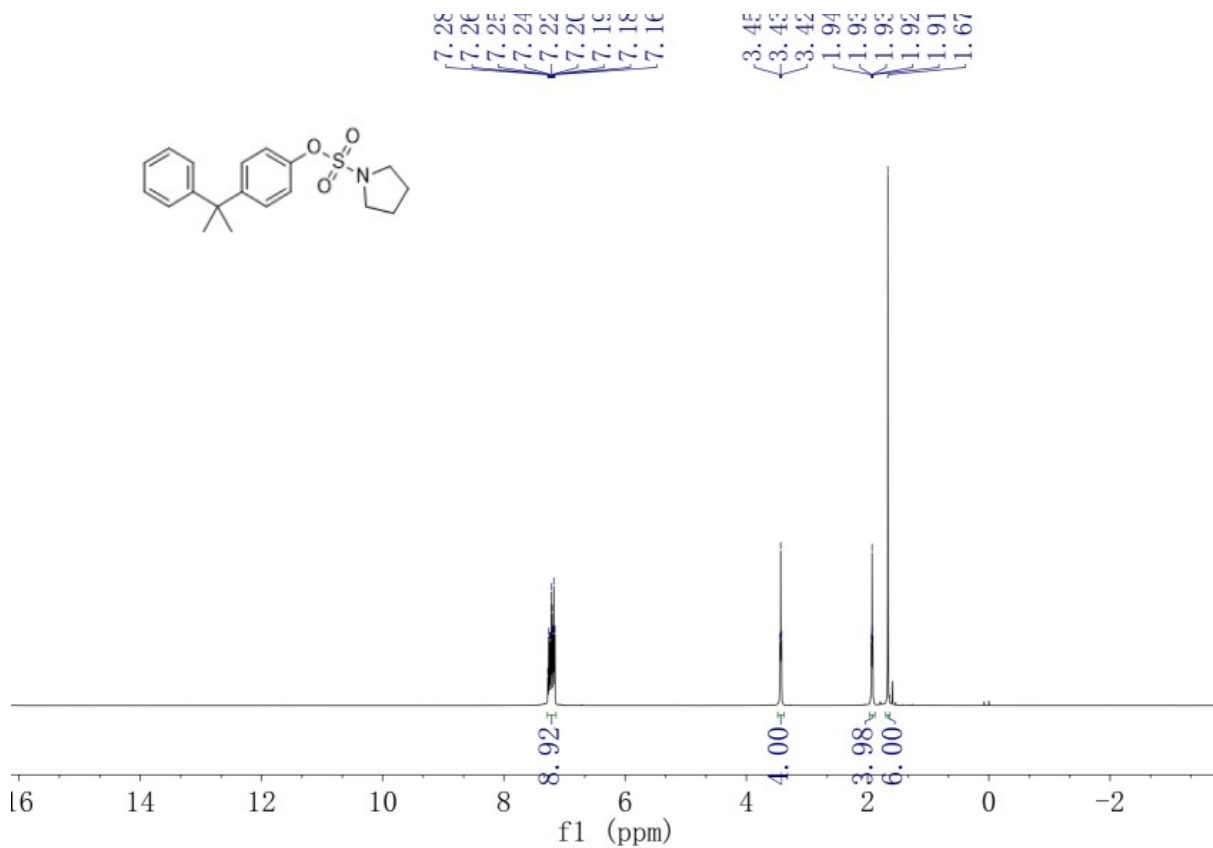

### <sup>13</sup>C NMR of 3a

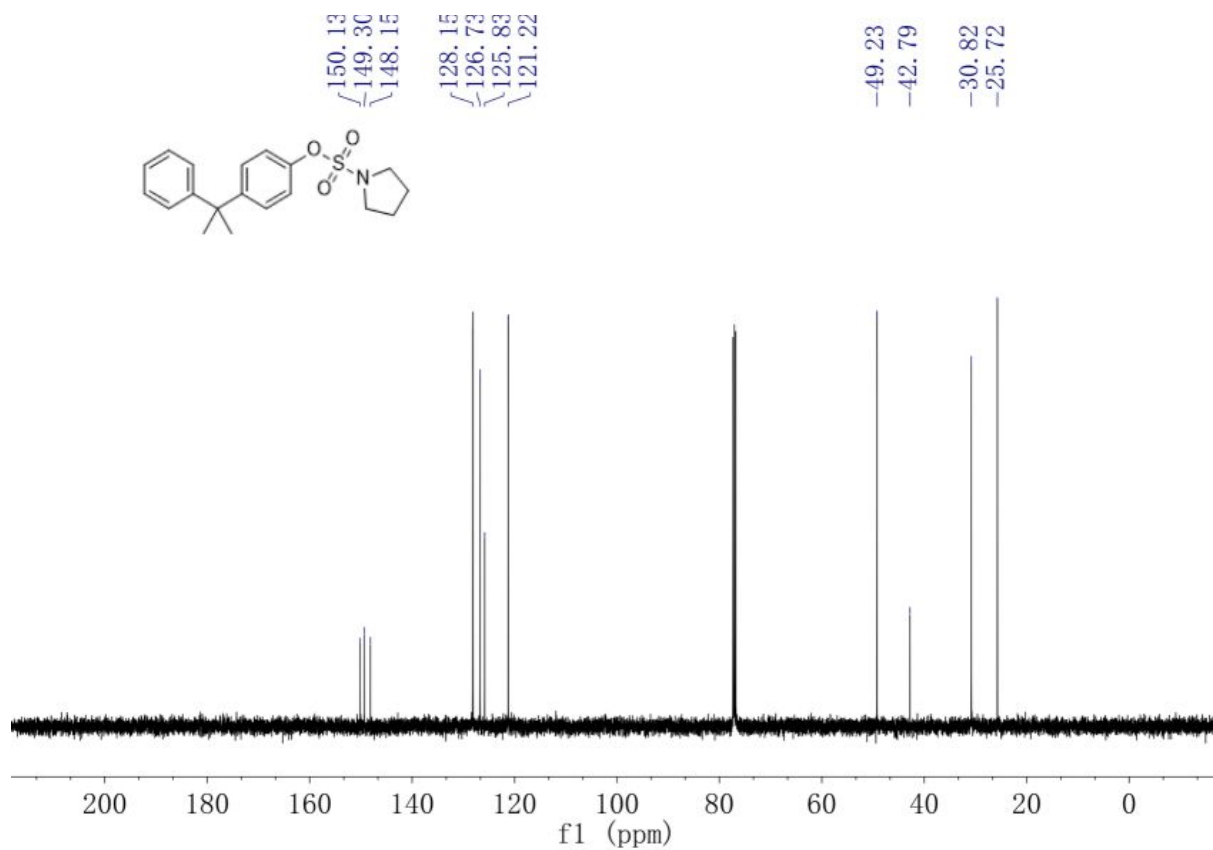

**<sup>1</sup>H NMR of 3b**

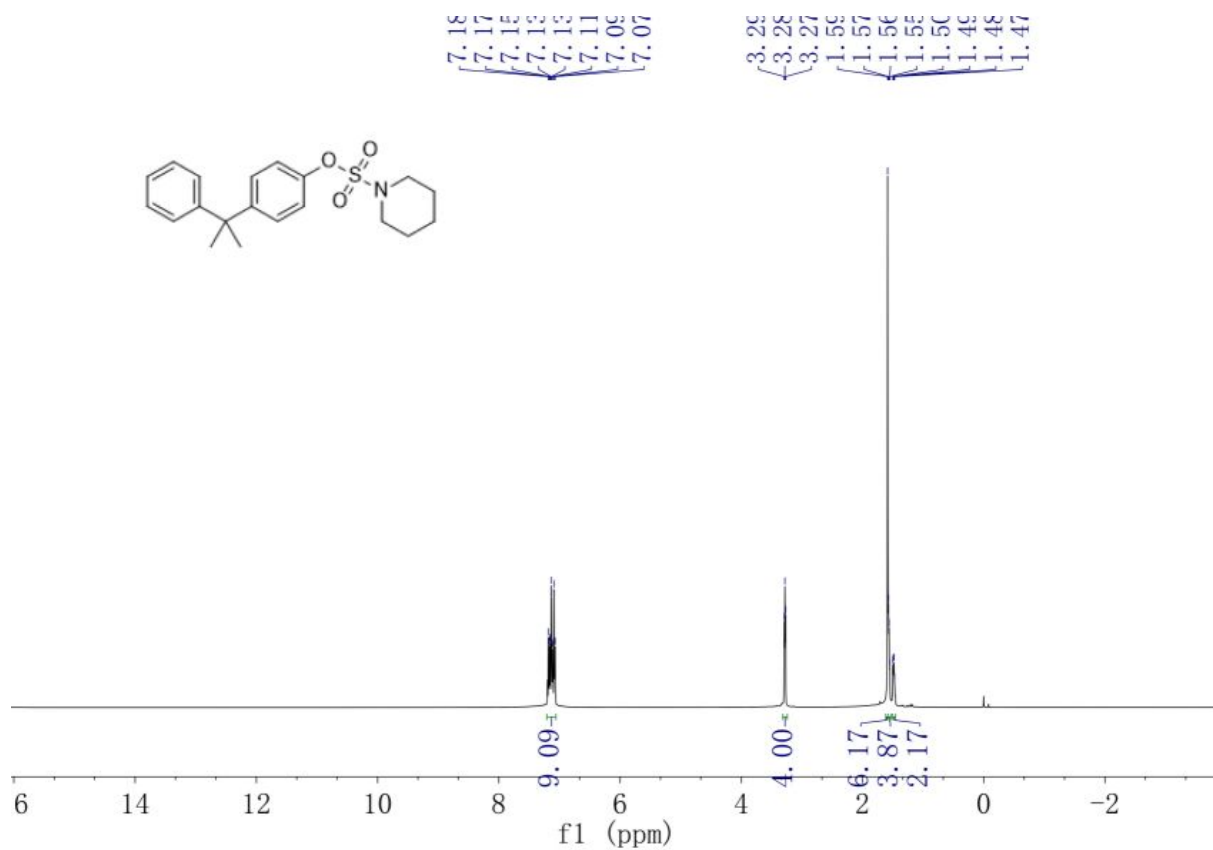

**<sup>13</sup>C NMR of 3b**



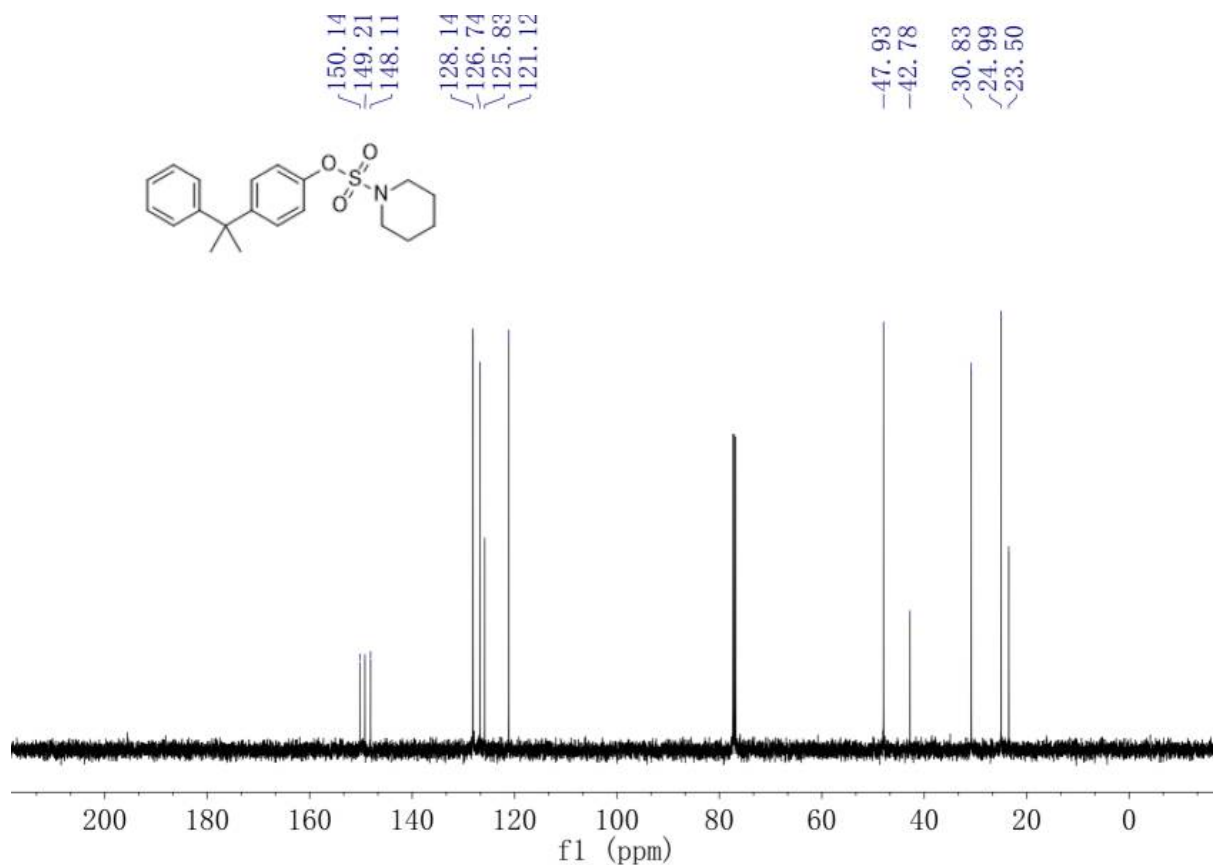

### <sup>1</sup>H NMR of 3c

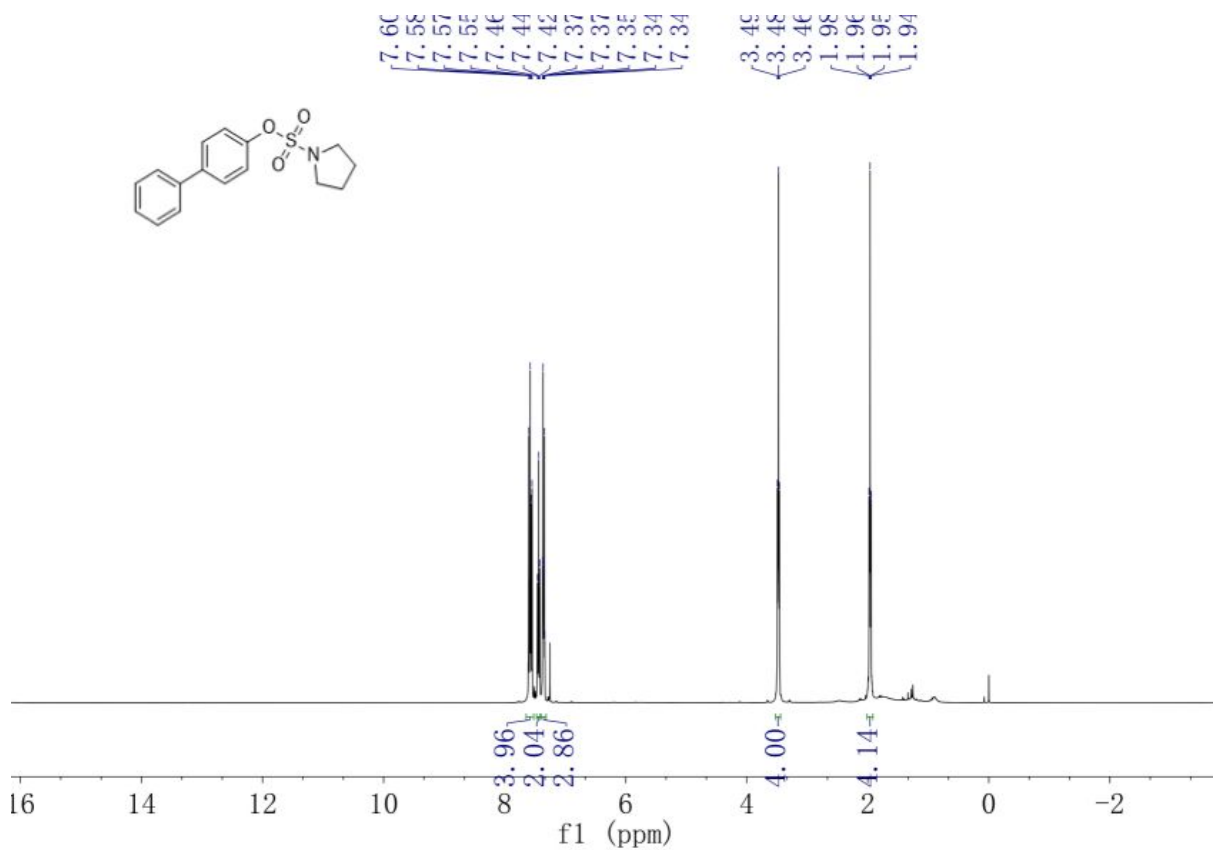

### <sup>13</sup>C NMR of 3c

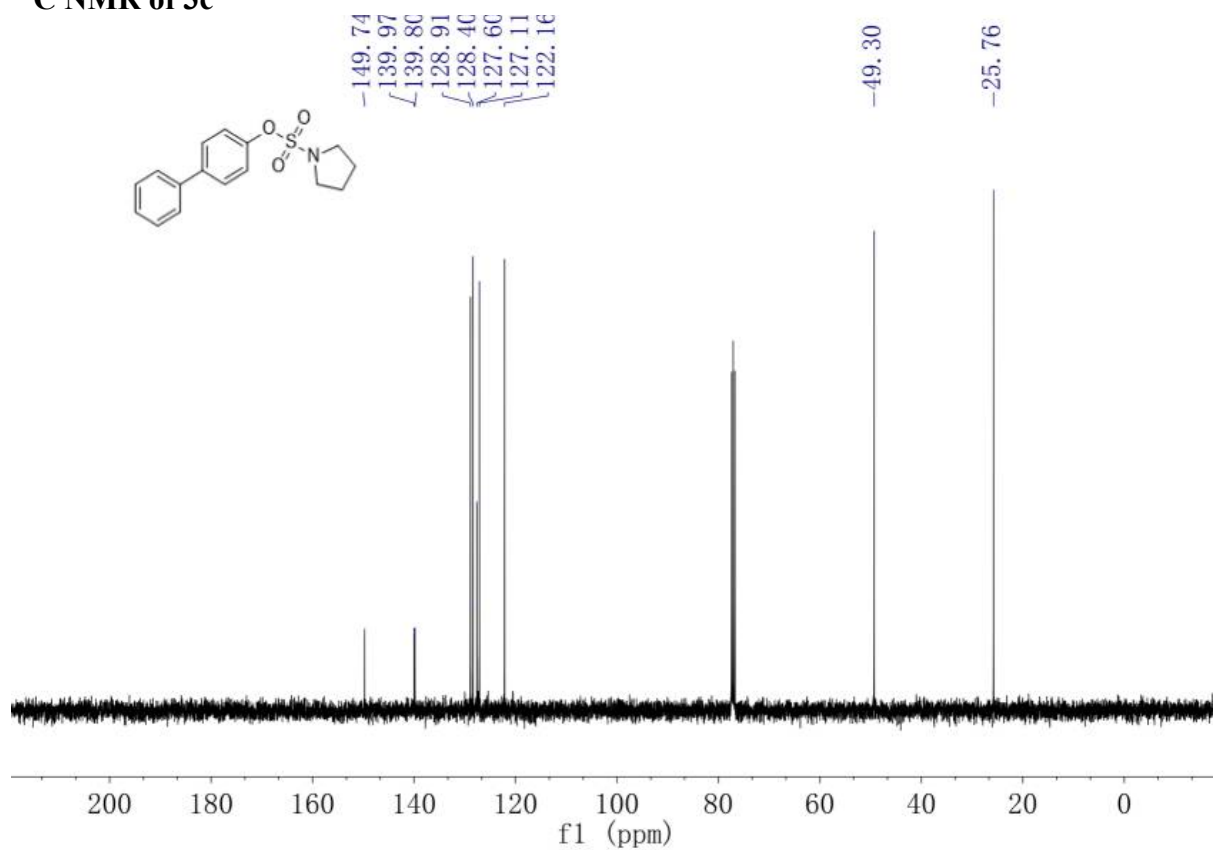

### <sup>1</sup>H NMR of 3d

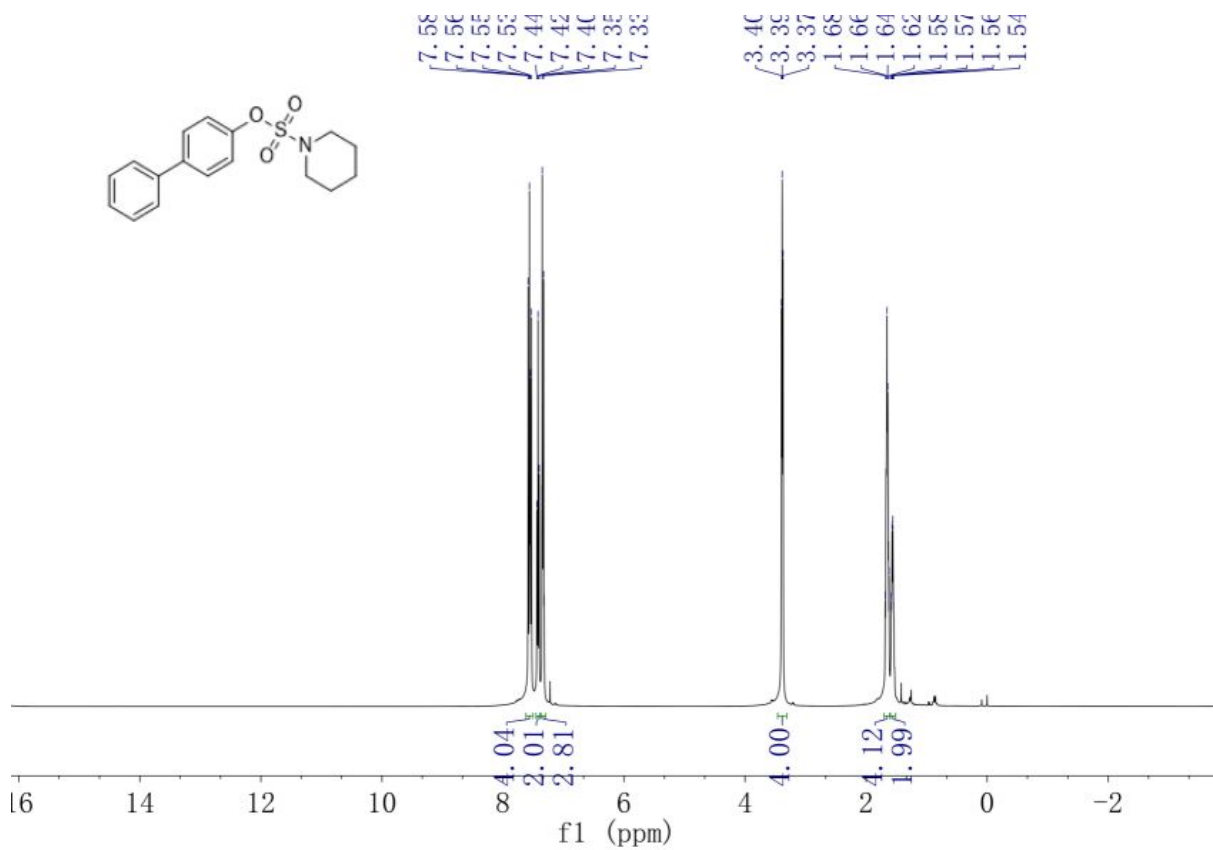

### <sup>13</sup>C NMR of 3d

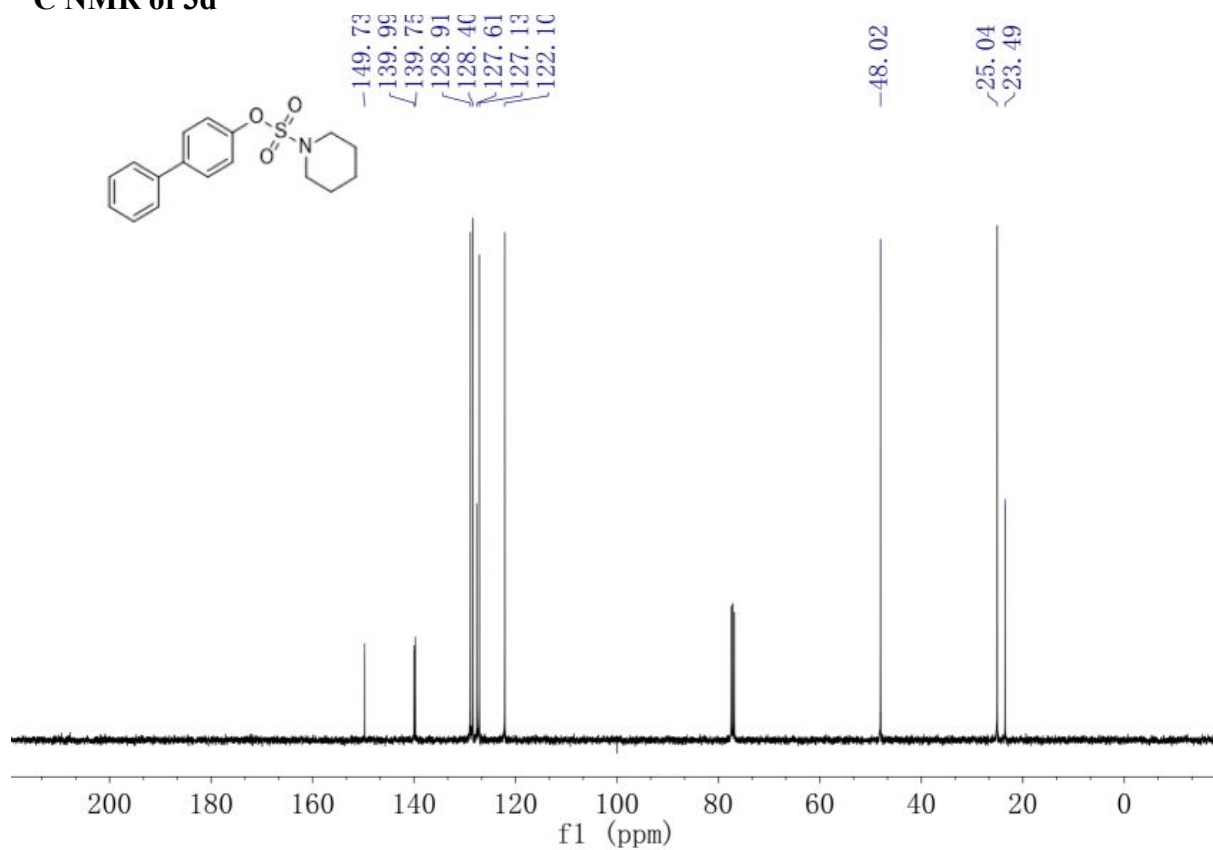

### <sup>1</sup>H NMR of 3e

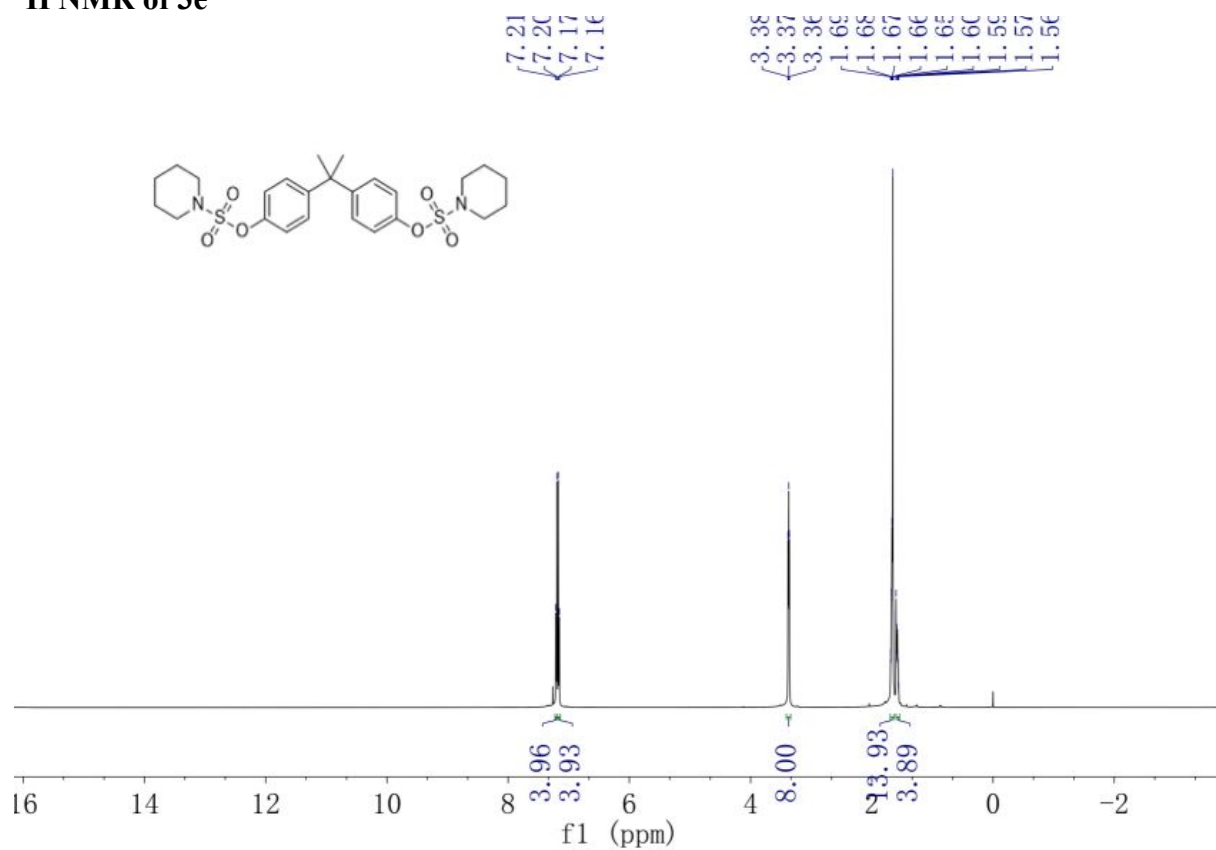

### <sup>13</sup>C NMR of 3e

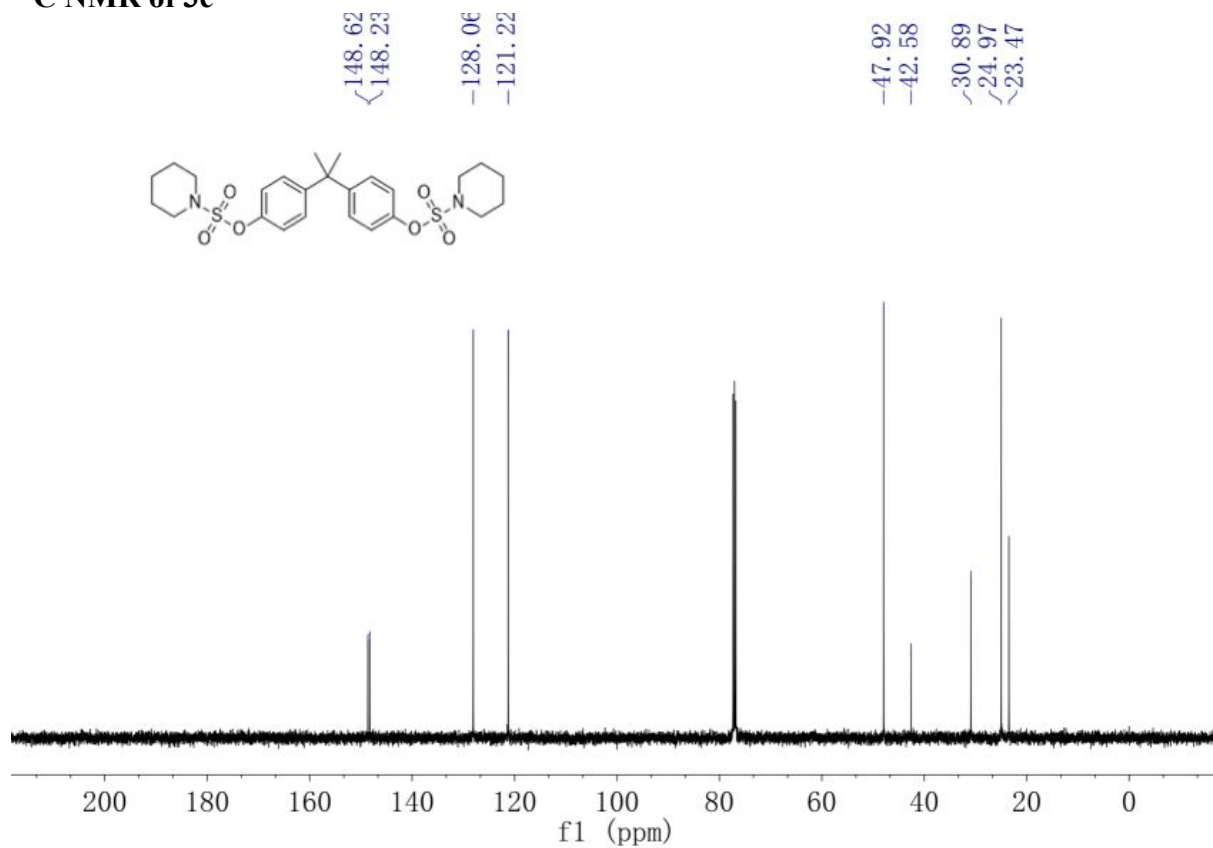

### <sup>1</sup>H NMR of 3f

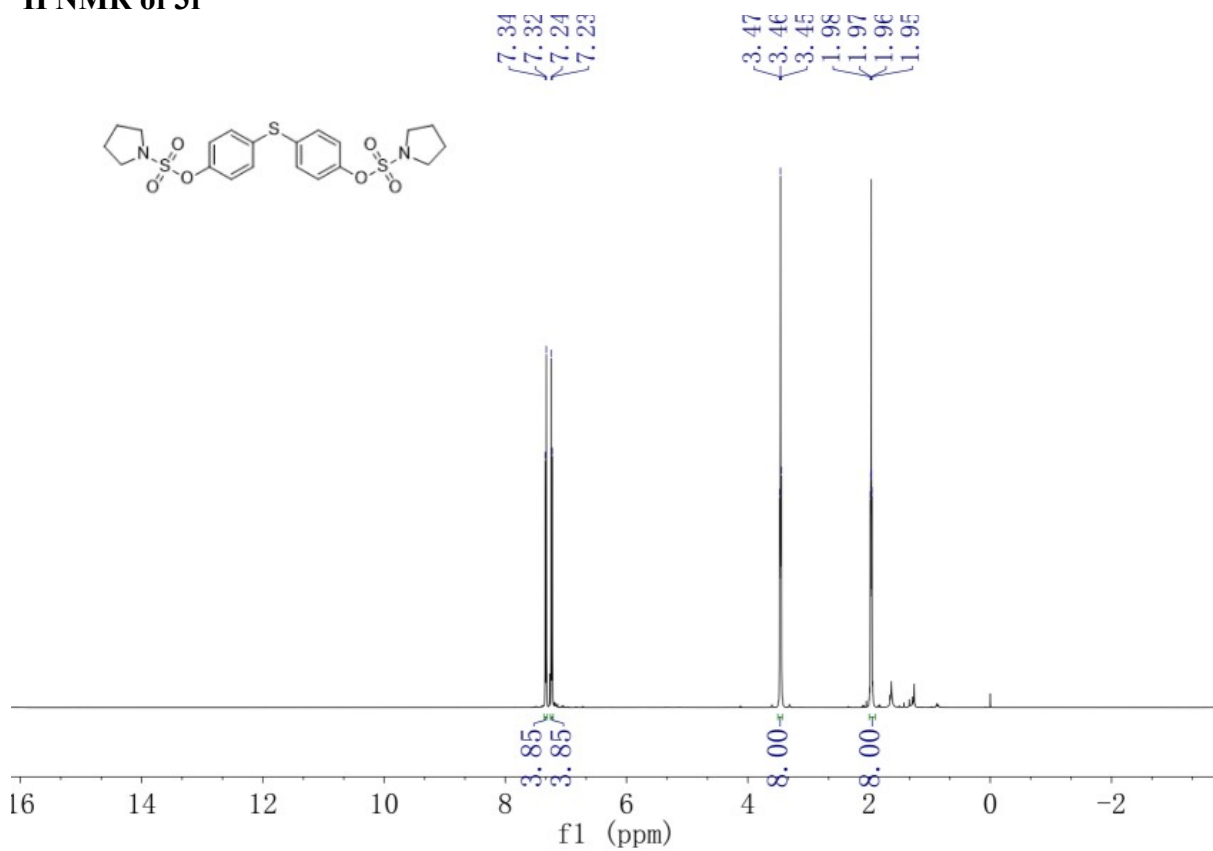

### <sup>13</sup>C NMR of 3f

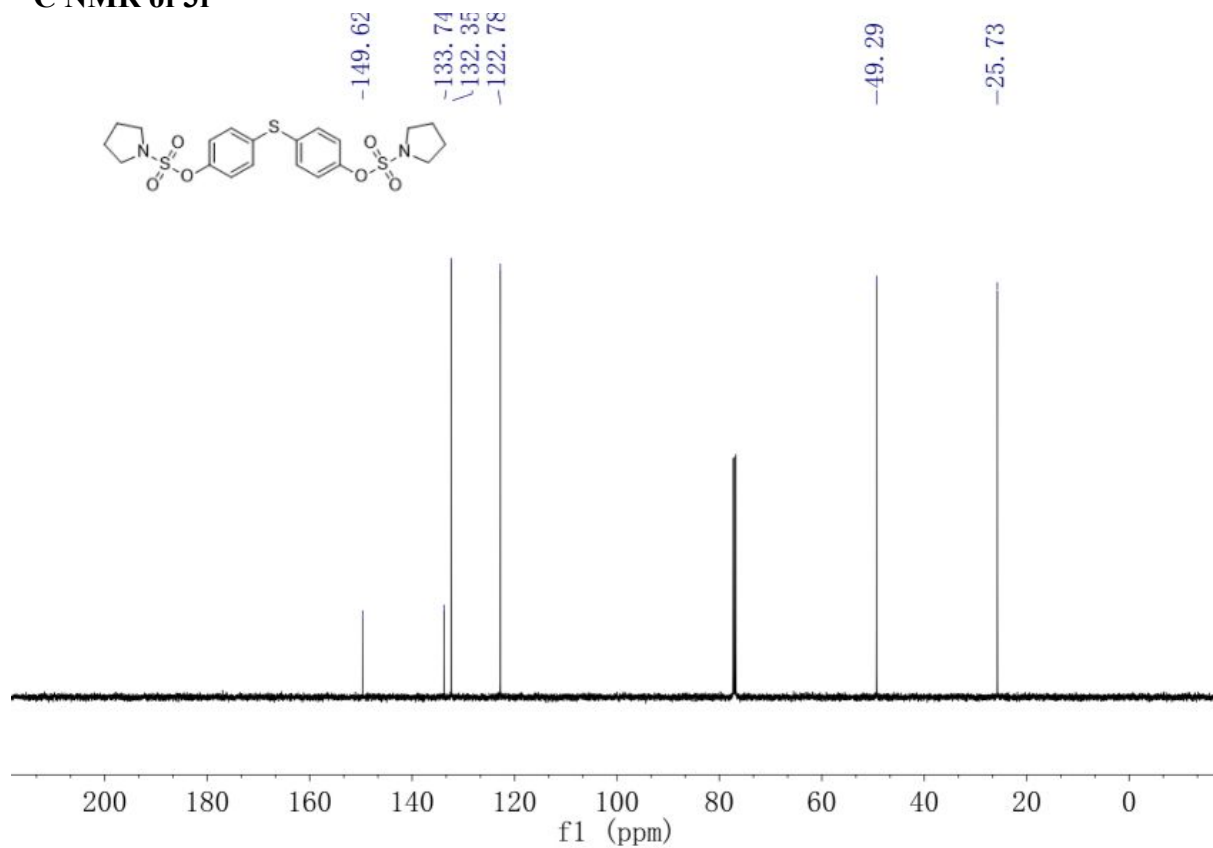

### <sup>1</sup>H NMR of 3g

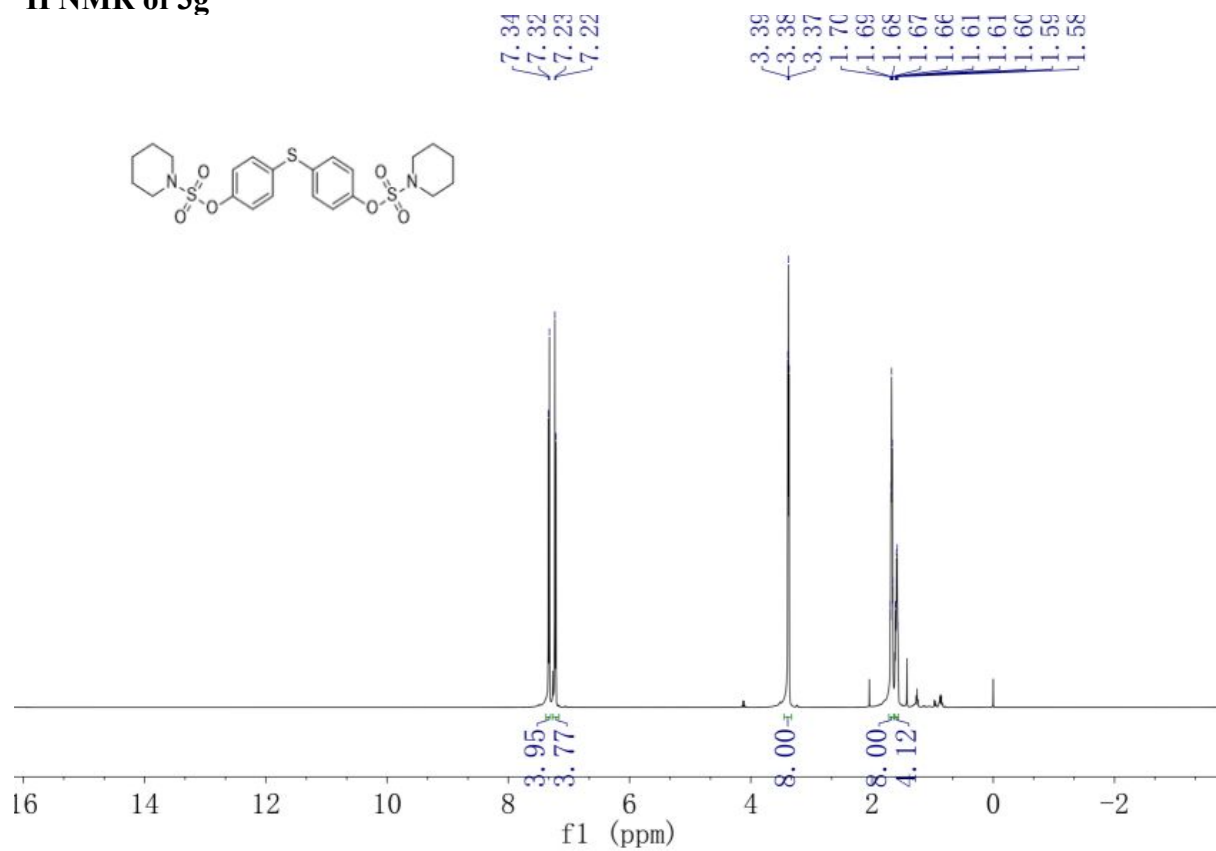

### <sup>13</sup>C NMR of 3g

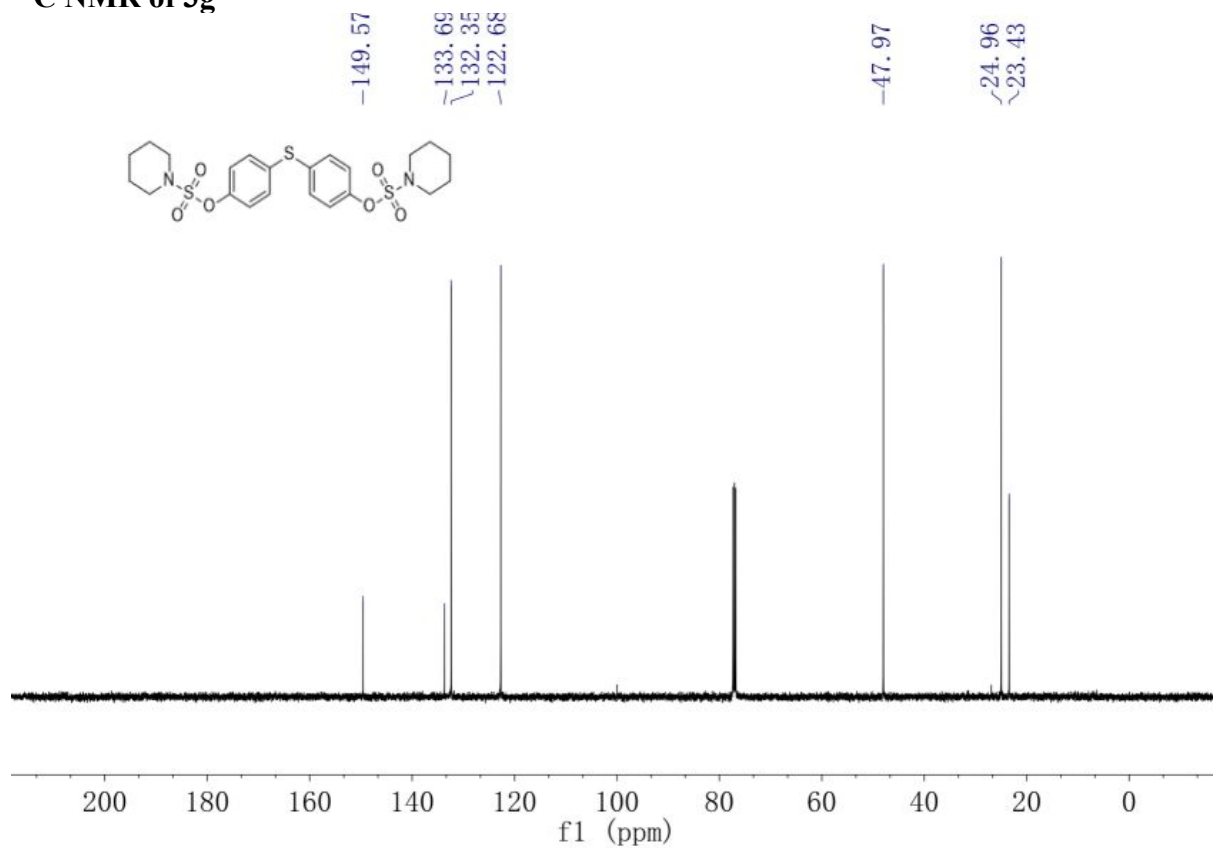

### <sup>1</sup>H NMR of 3h

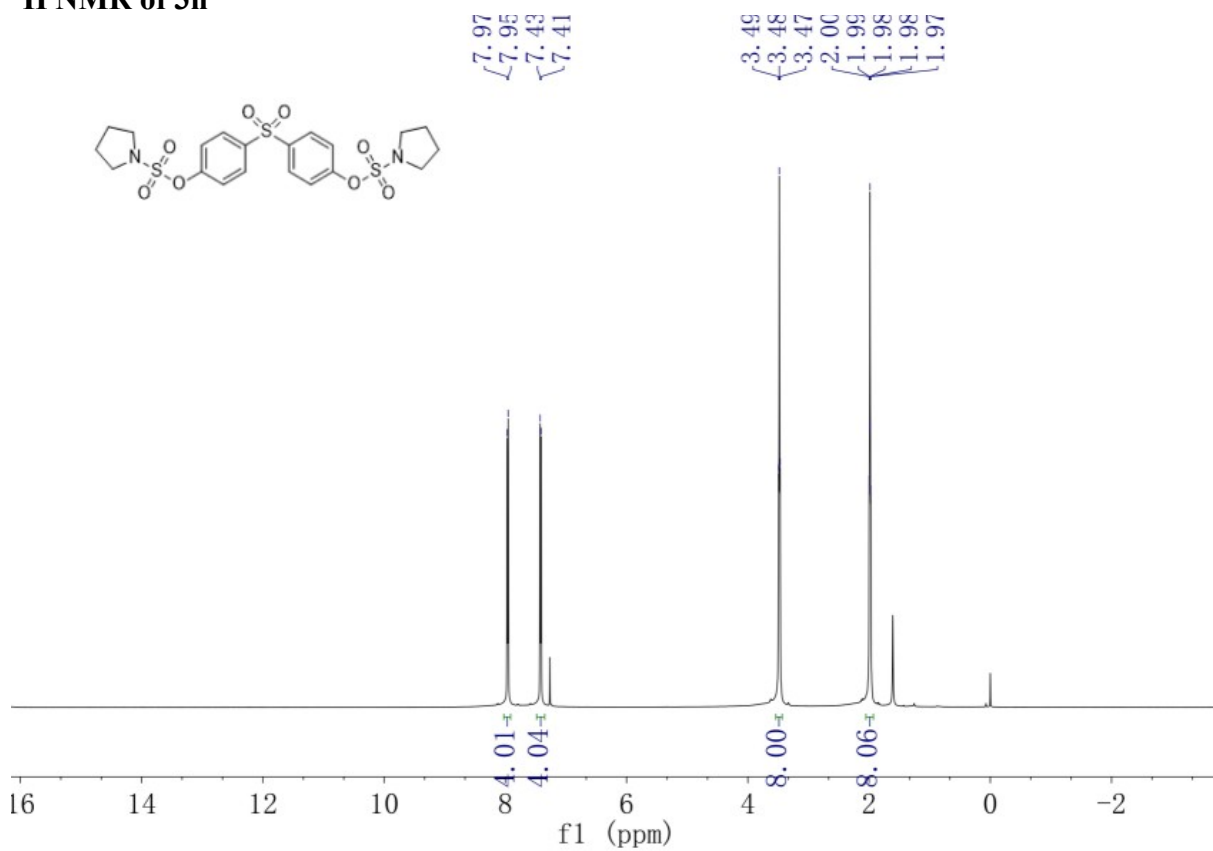

### <sup>13</sup>C NMR of 3h

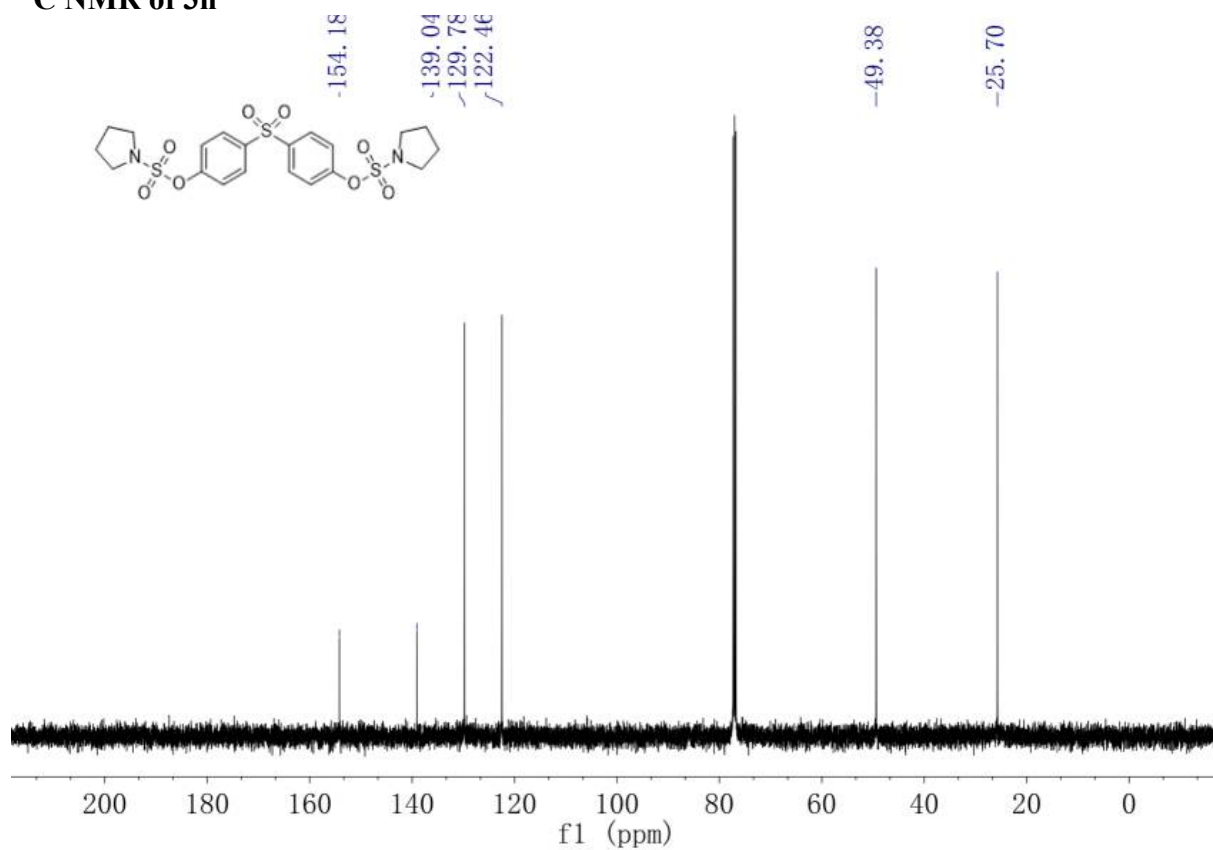

### <sup>1</sup>H NMR of 3i

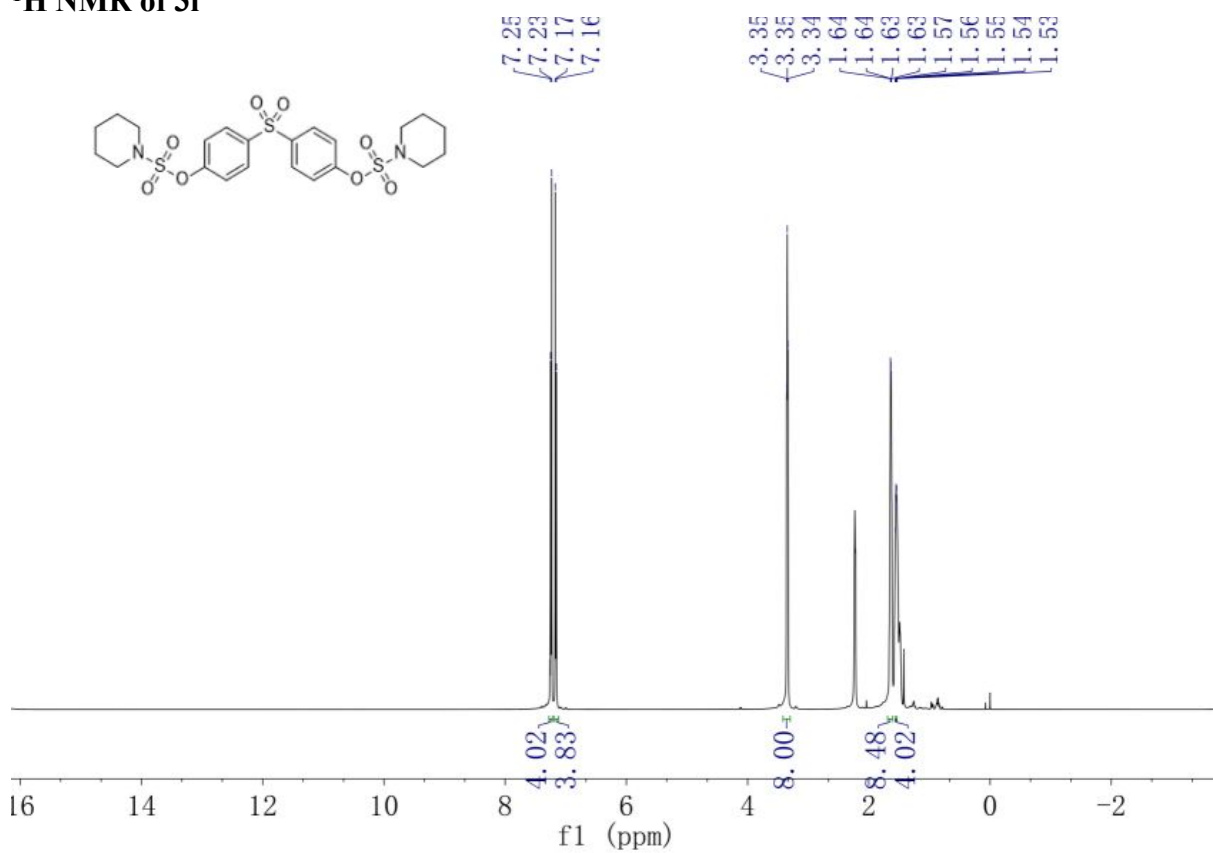

### <sup>13</sup>C NMR of 3i

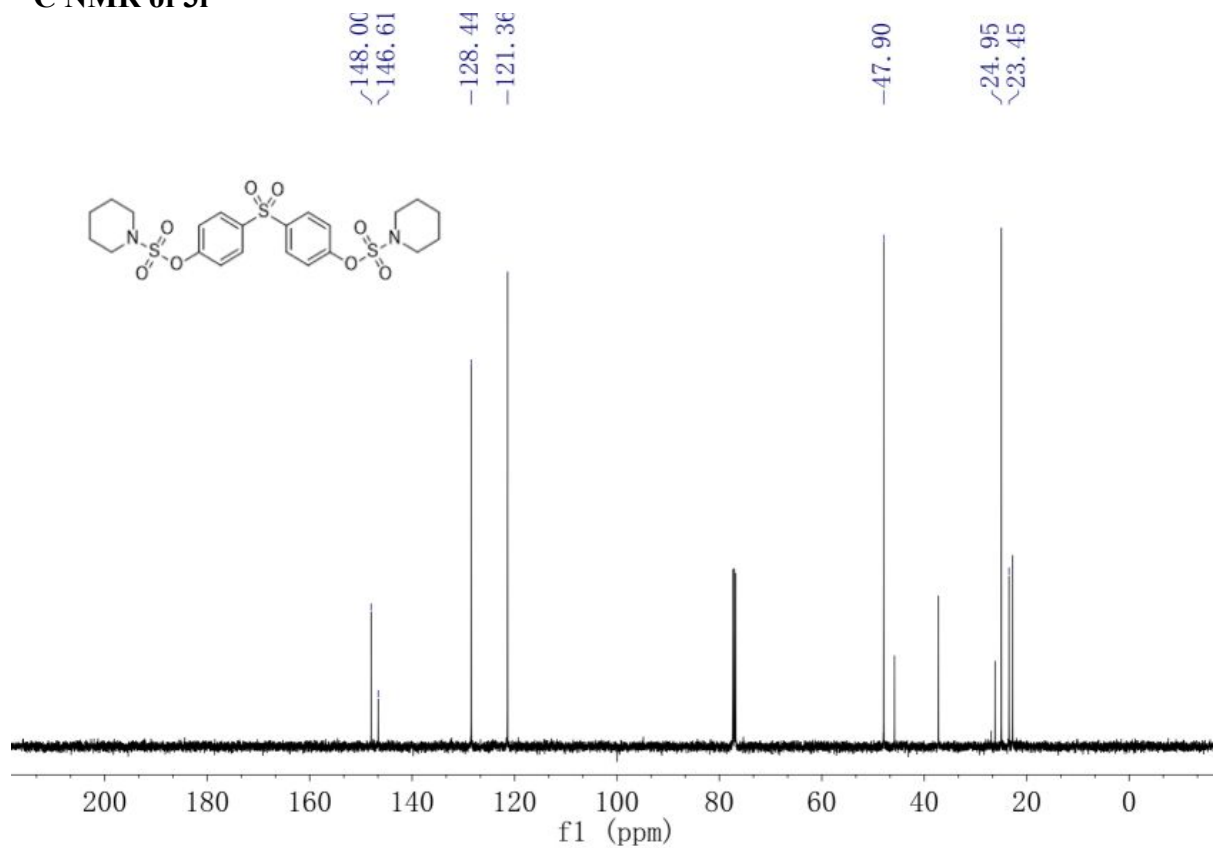

### <sup>1</sup>H NMR of 3j

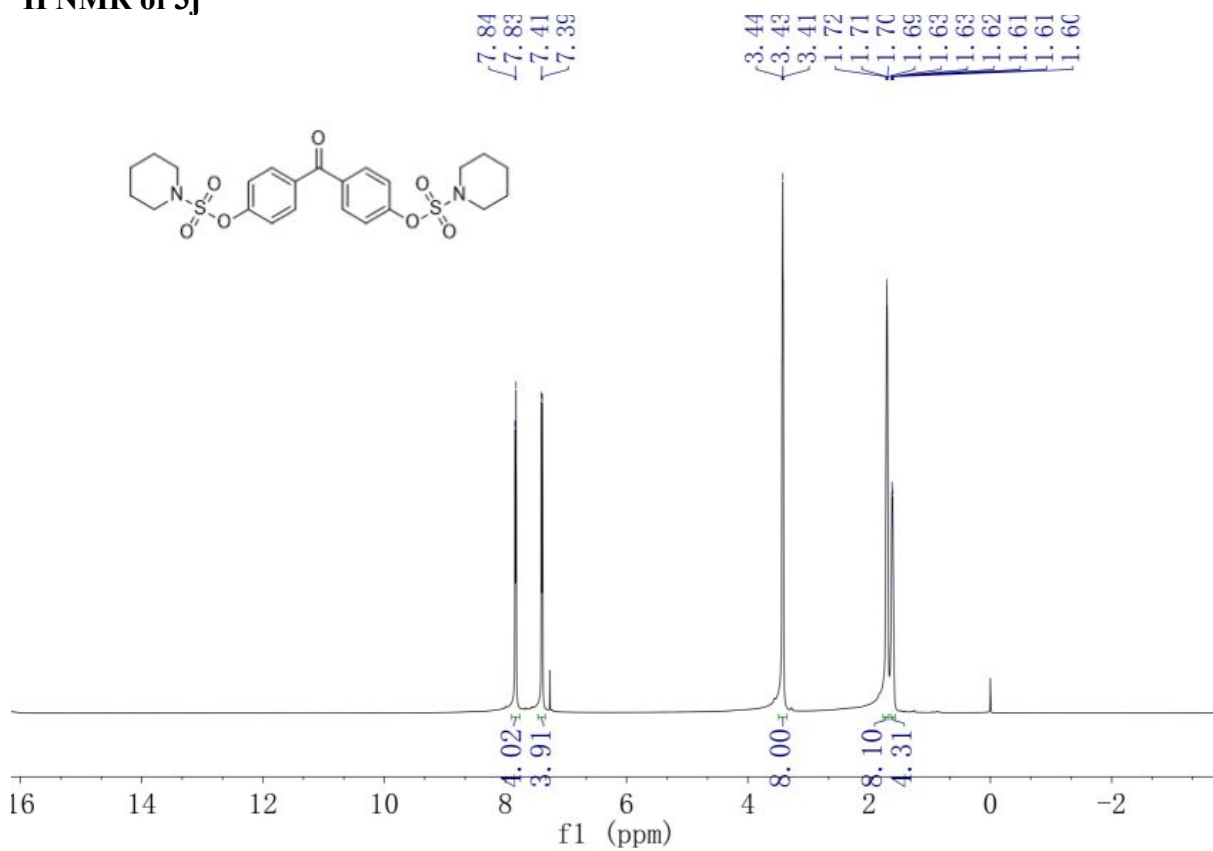



### <sup>13</sup>C NMR of 3j

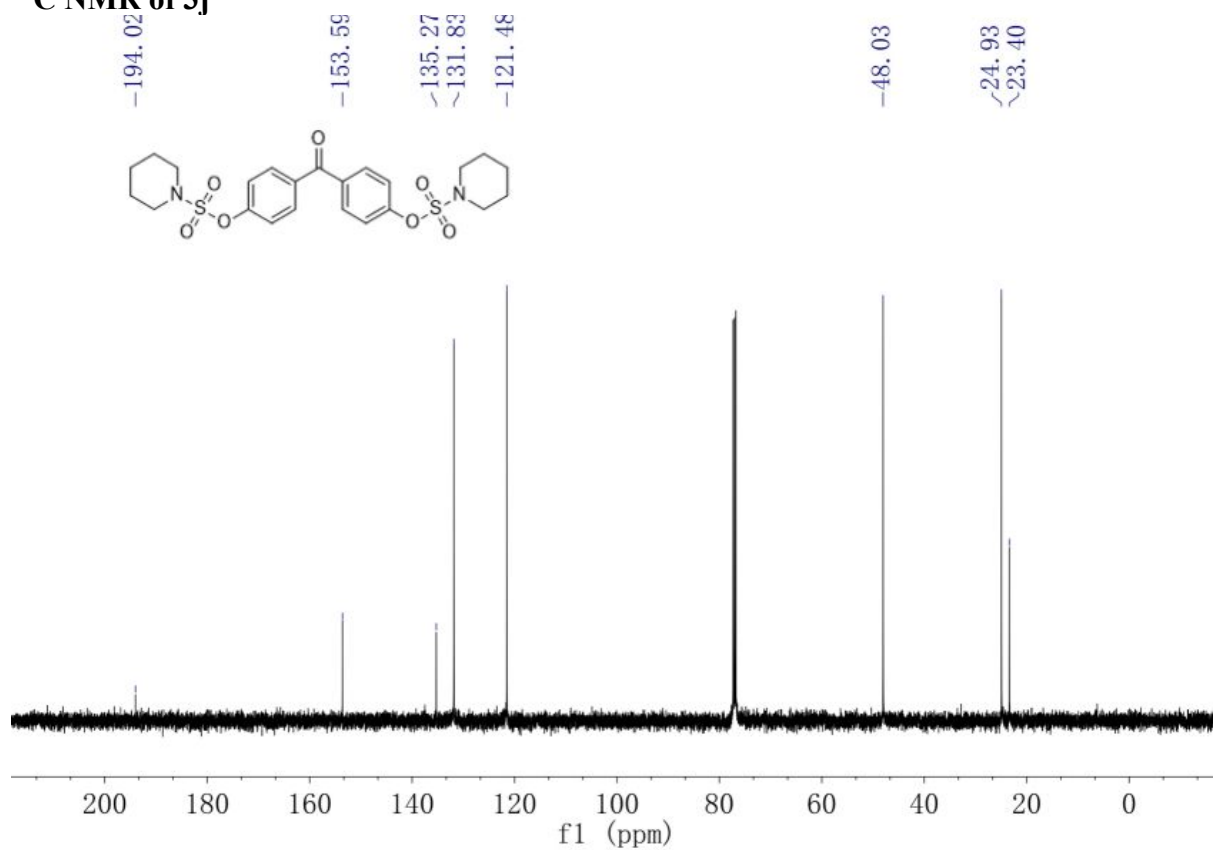

### <sup>1</sup>H NMR of 3k

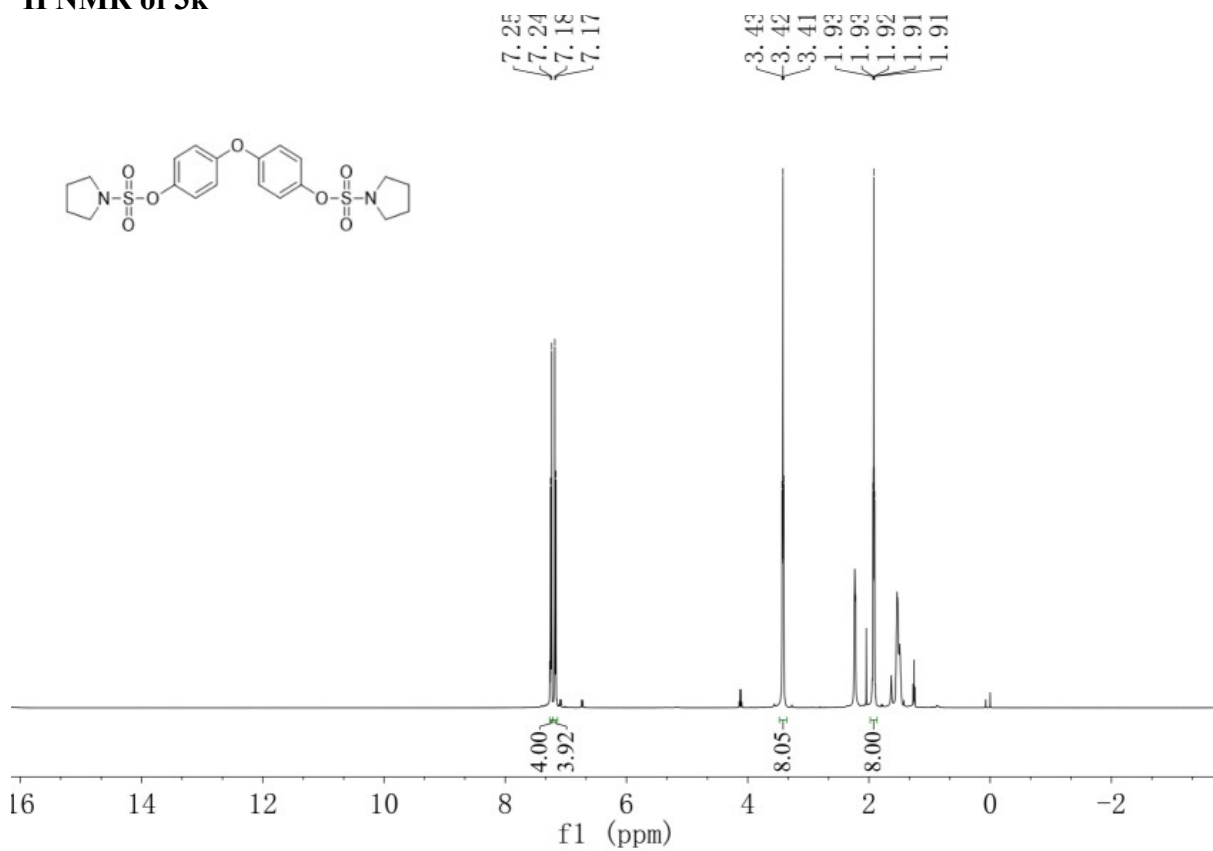

### <sup>13</sup>C NMR of 3k

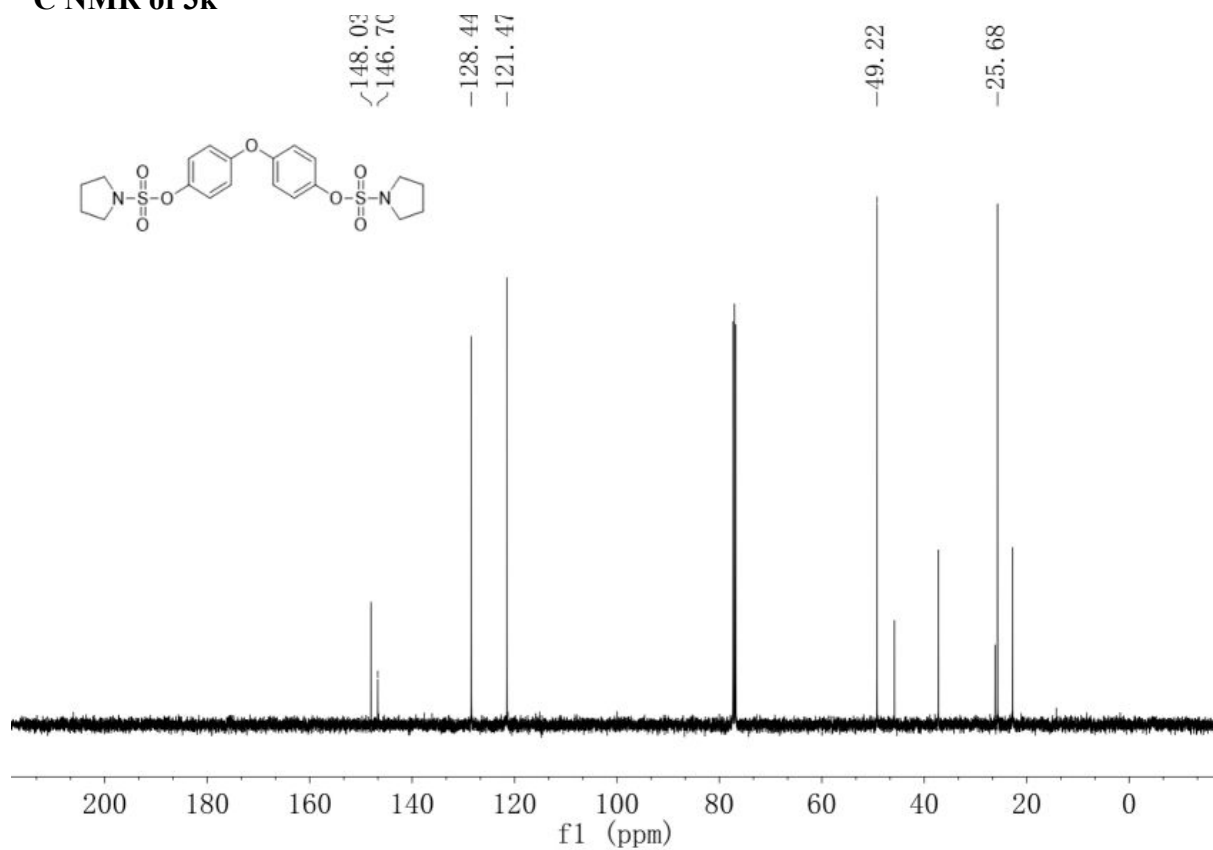

### <sup>1</sup>H NMR of 3l

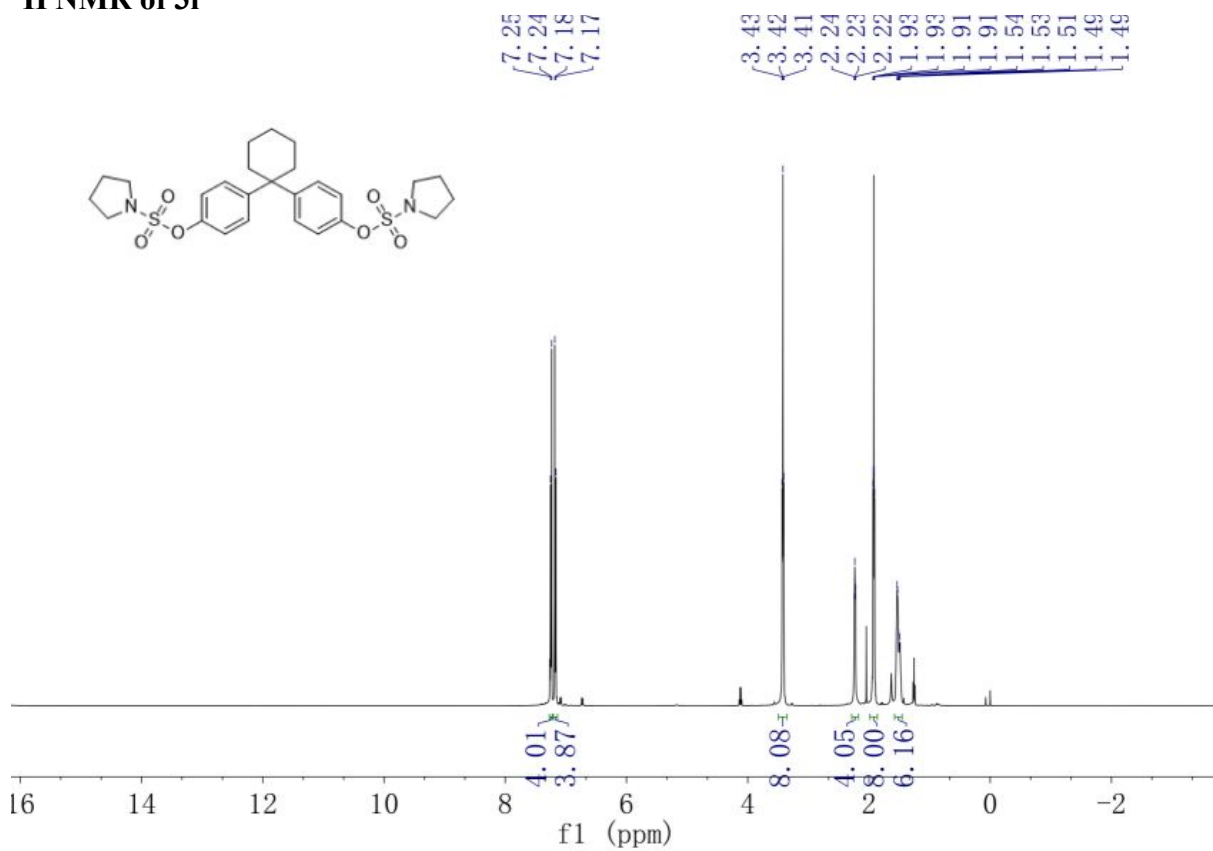

### <sup>13</sup>C NMR of 3l

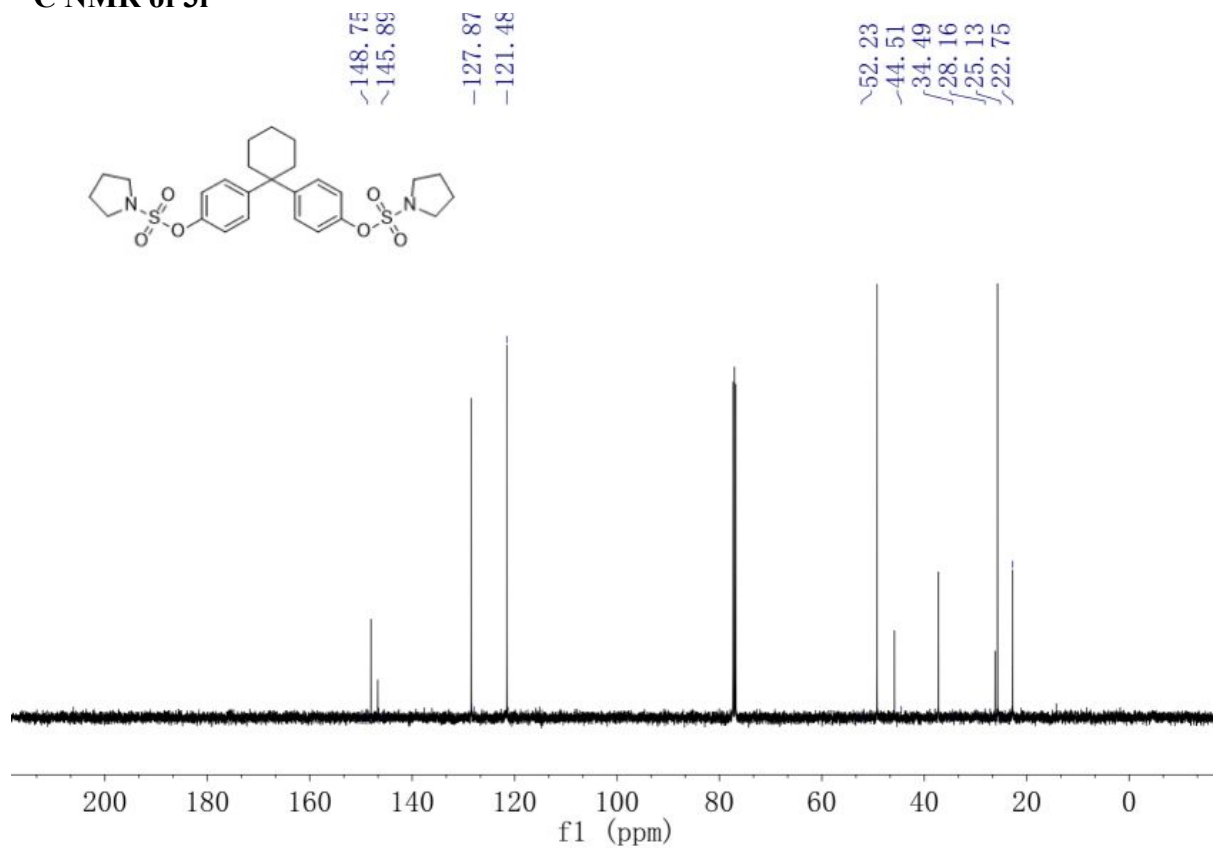

### <sup>1</sup>H NMR of 3m

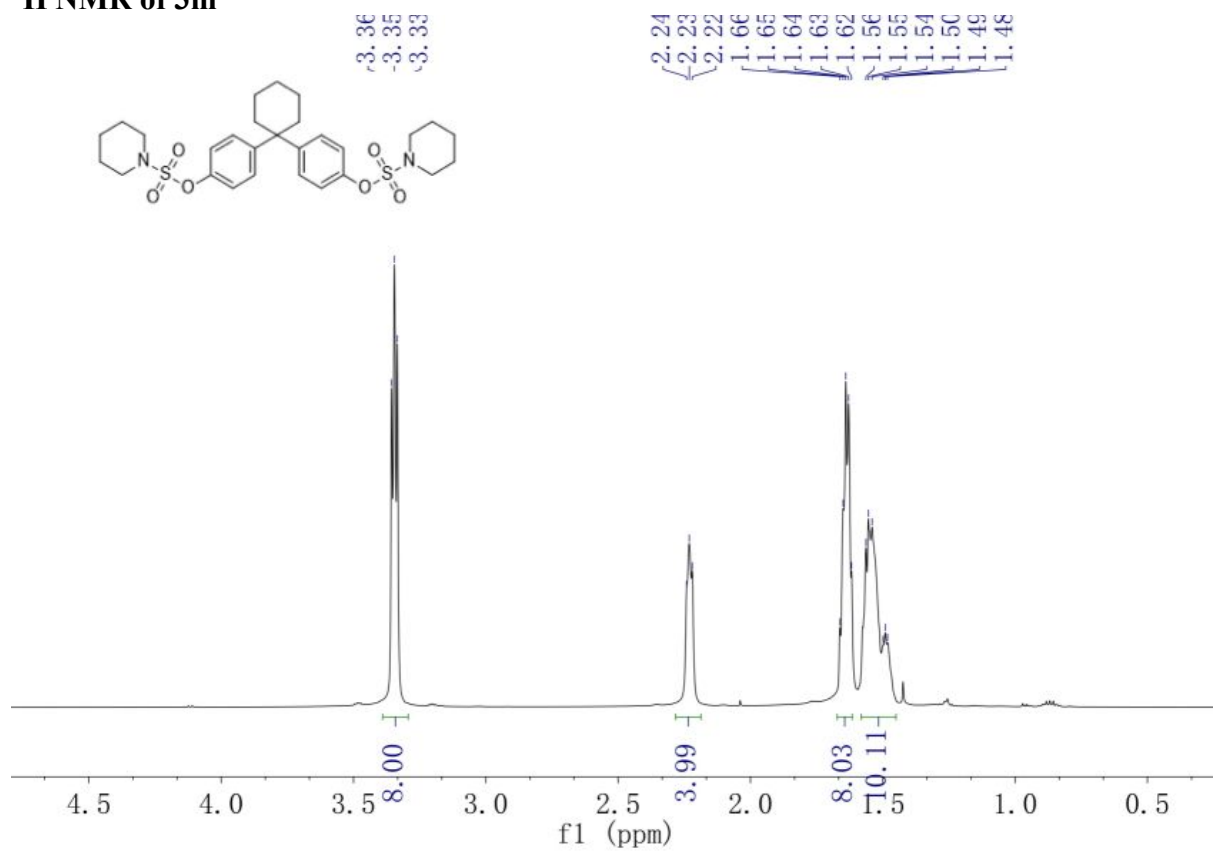

### <sup>13</sup>C NMR of 3m

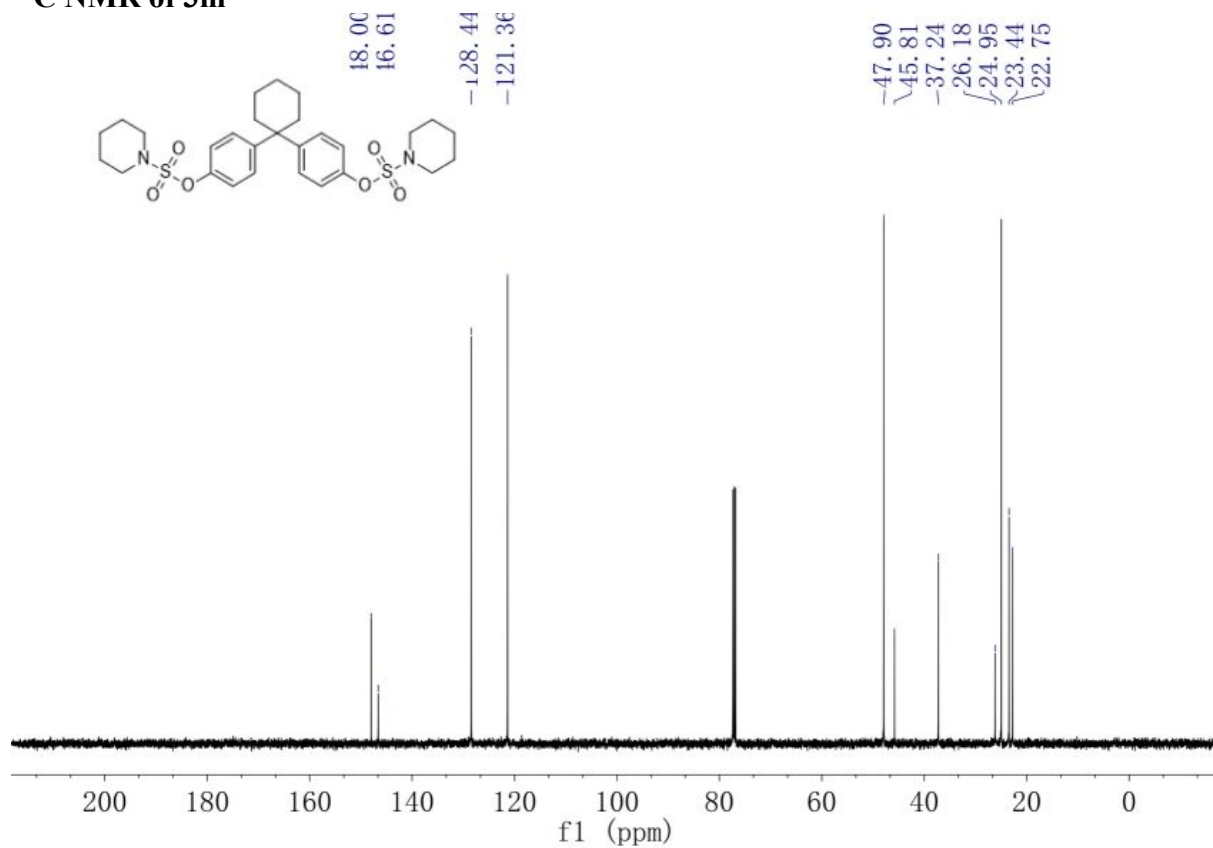

### <sup>1</sup>H NMR of 3n

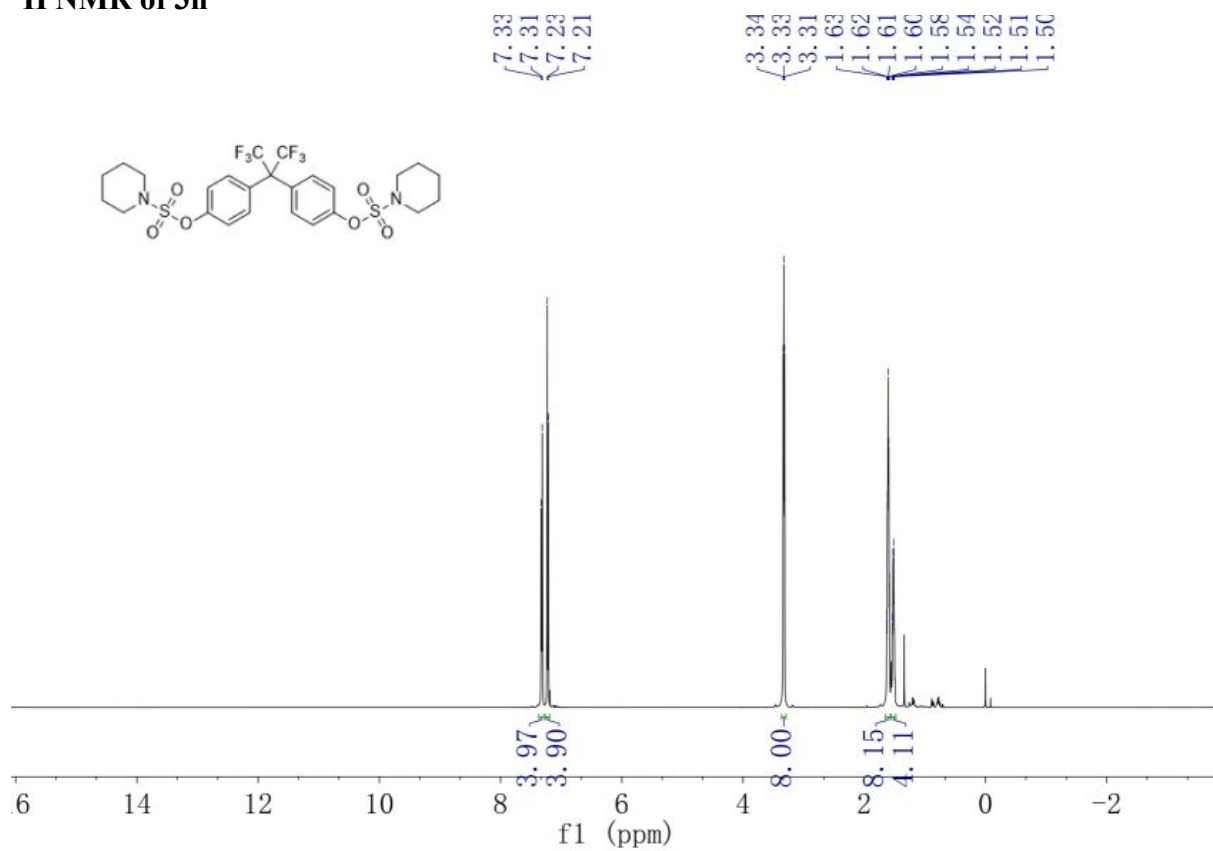

### <sup>13</sup>C NMR of 3n

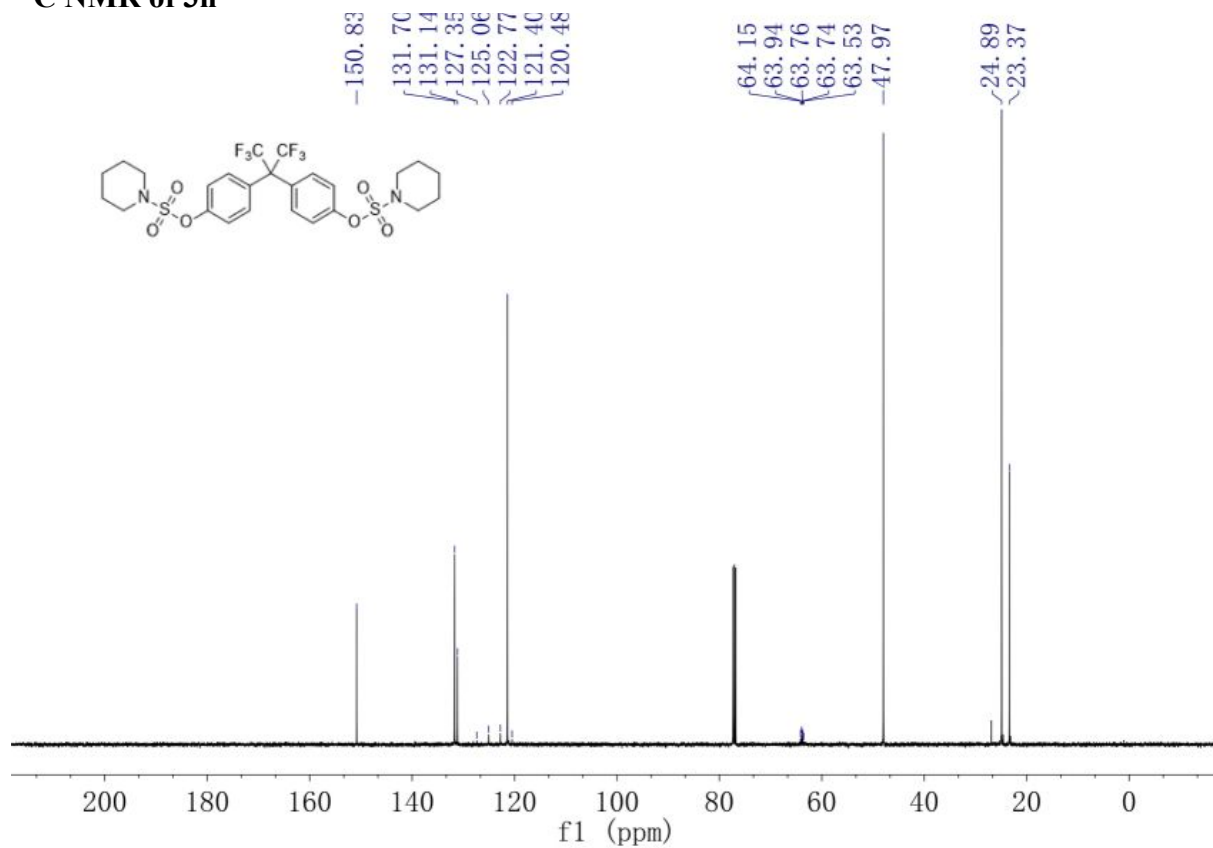

### <sup>1</sup>H NMR of 3o

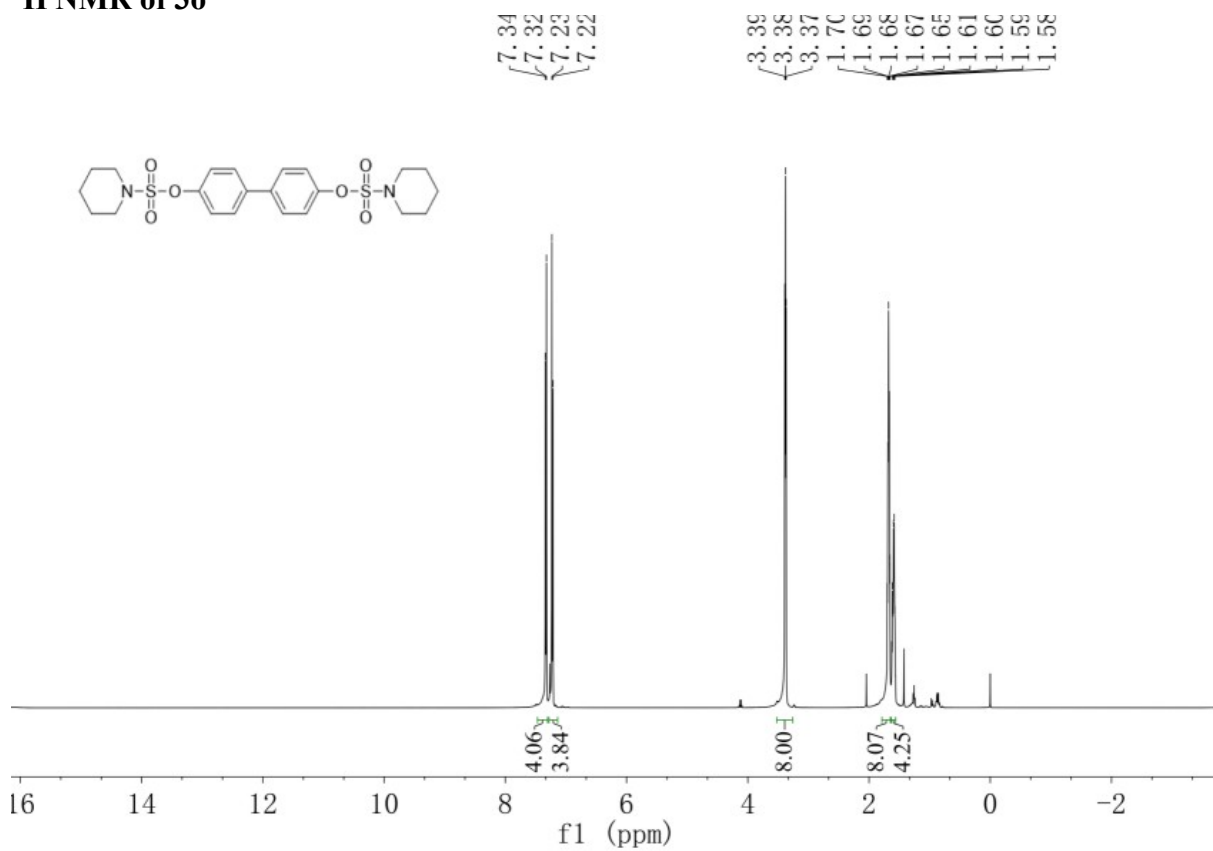

### <sup>13</sup>C NMR of 3o

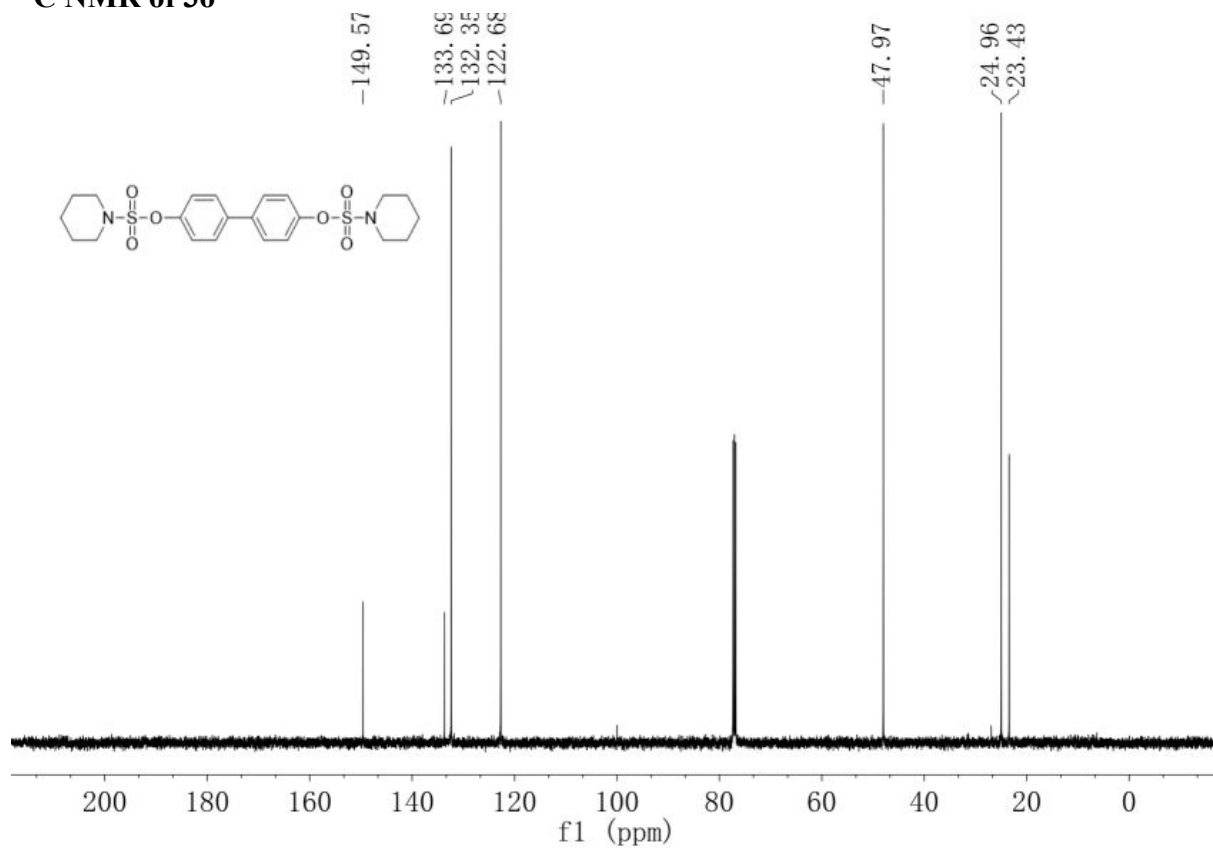

### <sup>1</sup>H NMR of 3p

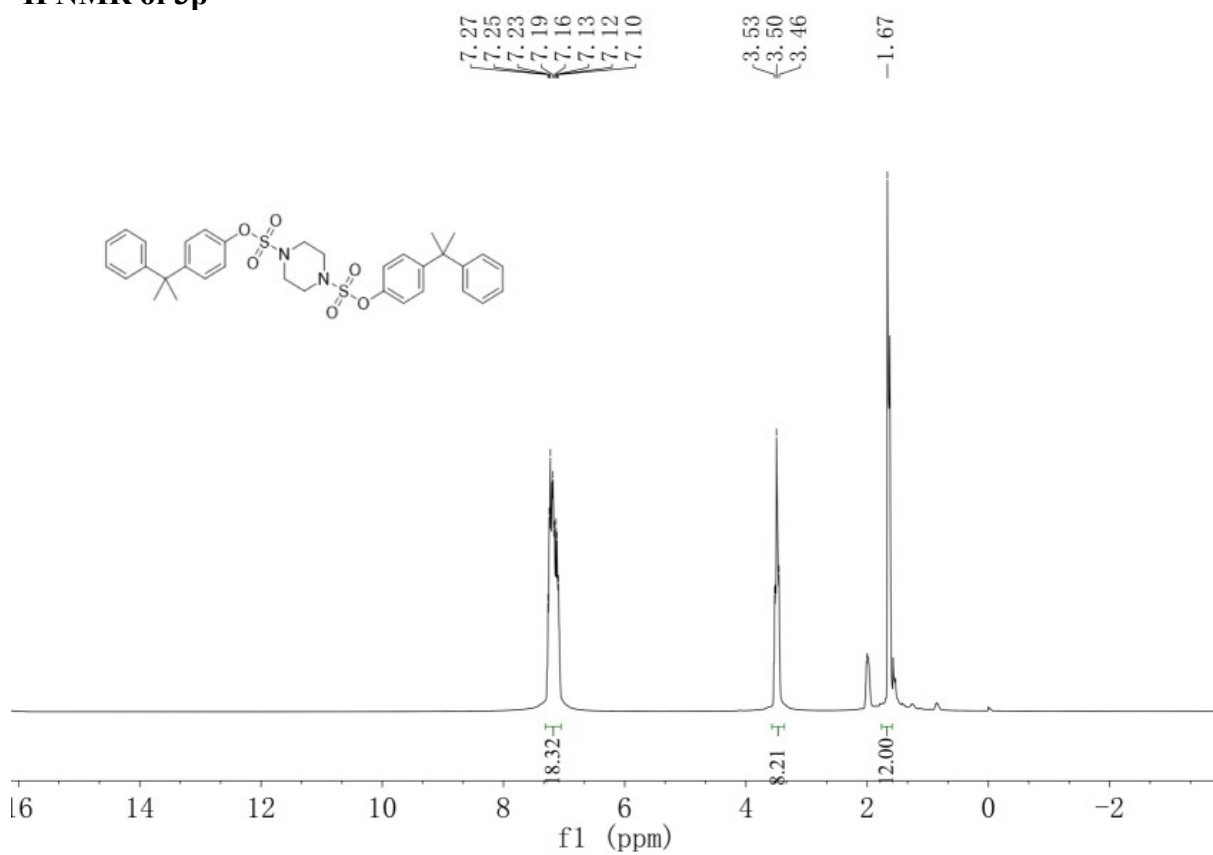

### <sup>13</sup>C NMR of 3p

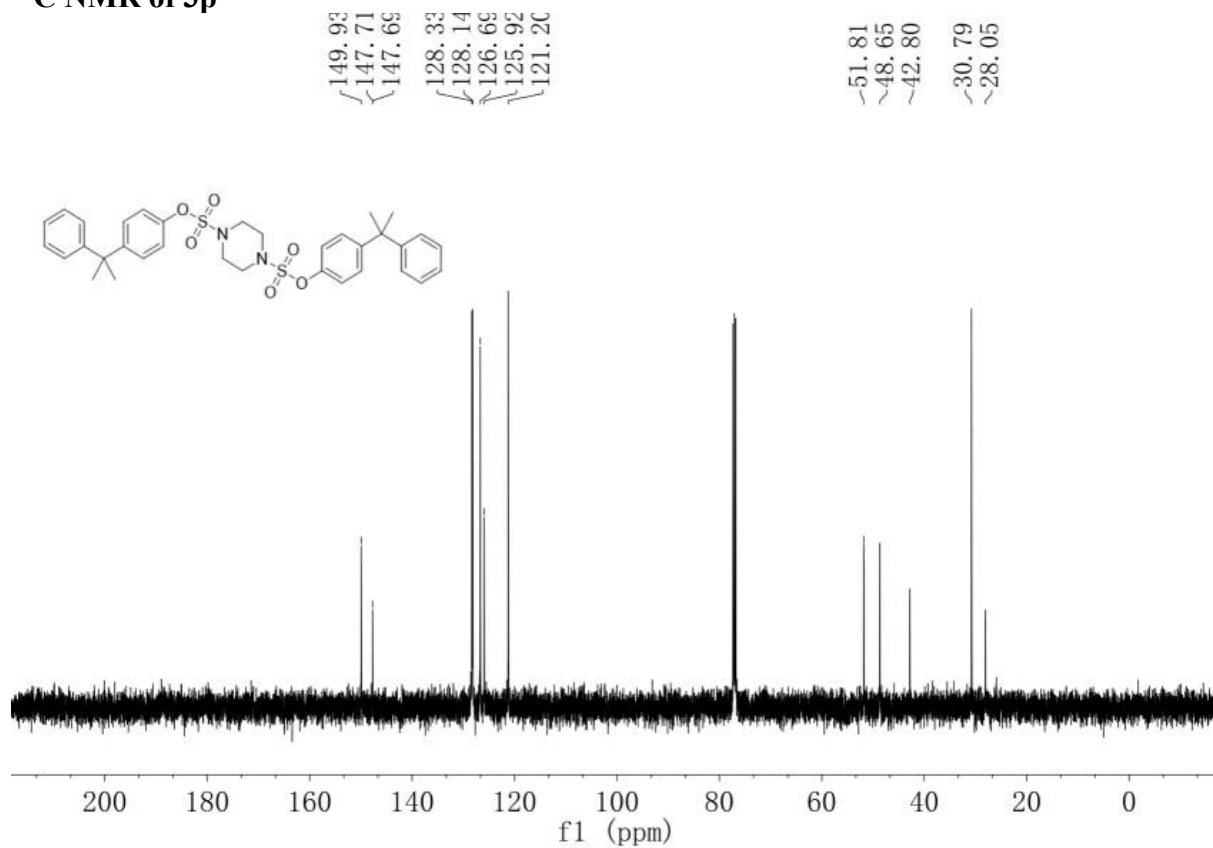

### <sup>1</sup>H NMR of 3r

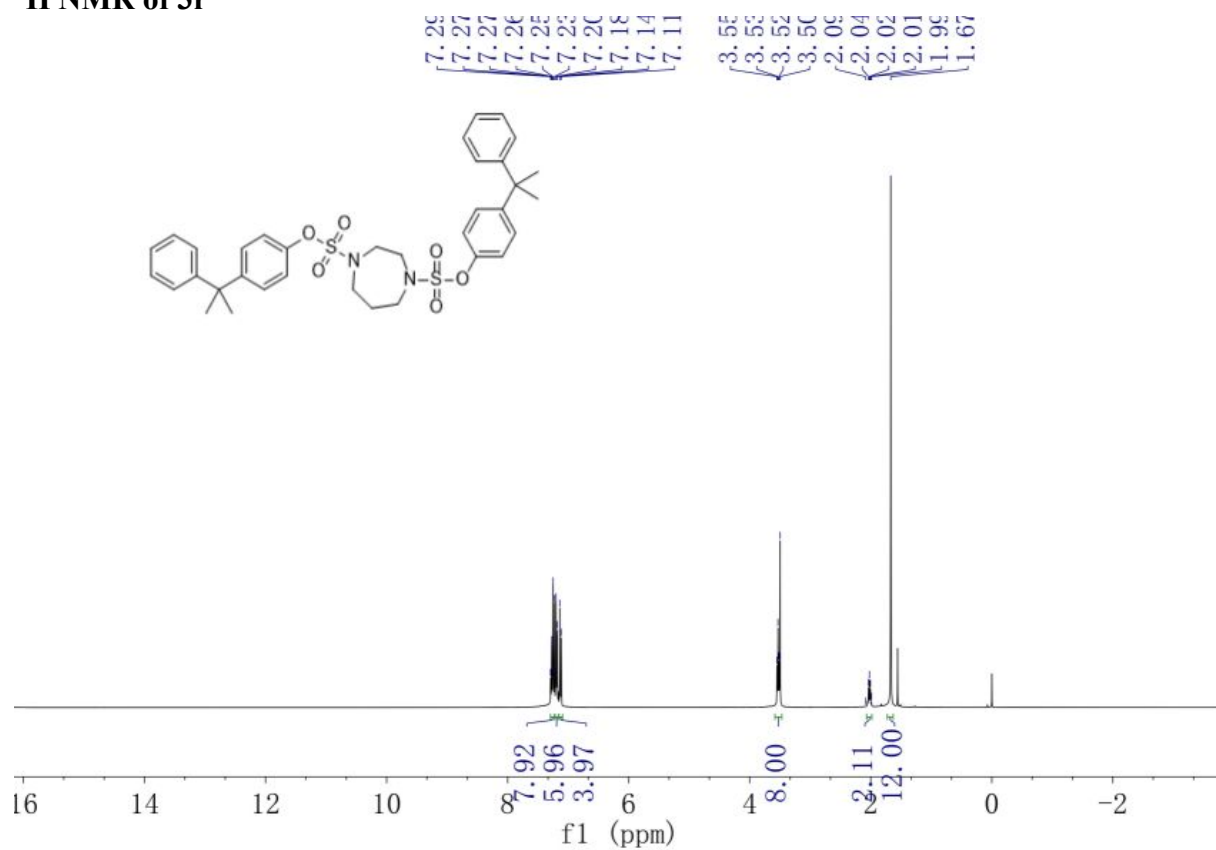

### <sup>13</sup>C NMR of 3r

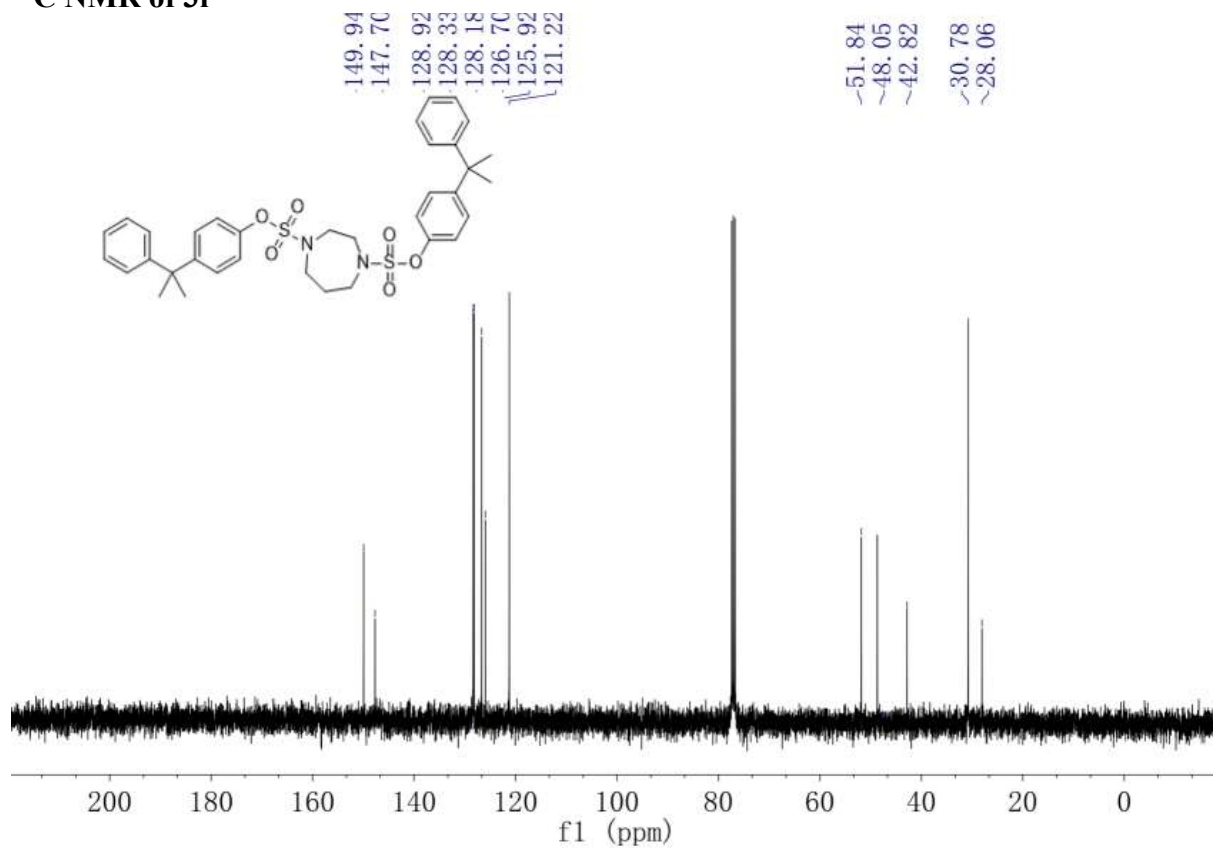

### <sup>1</sup>H NMR of 3s

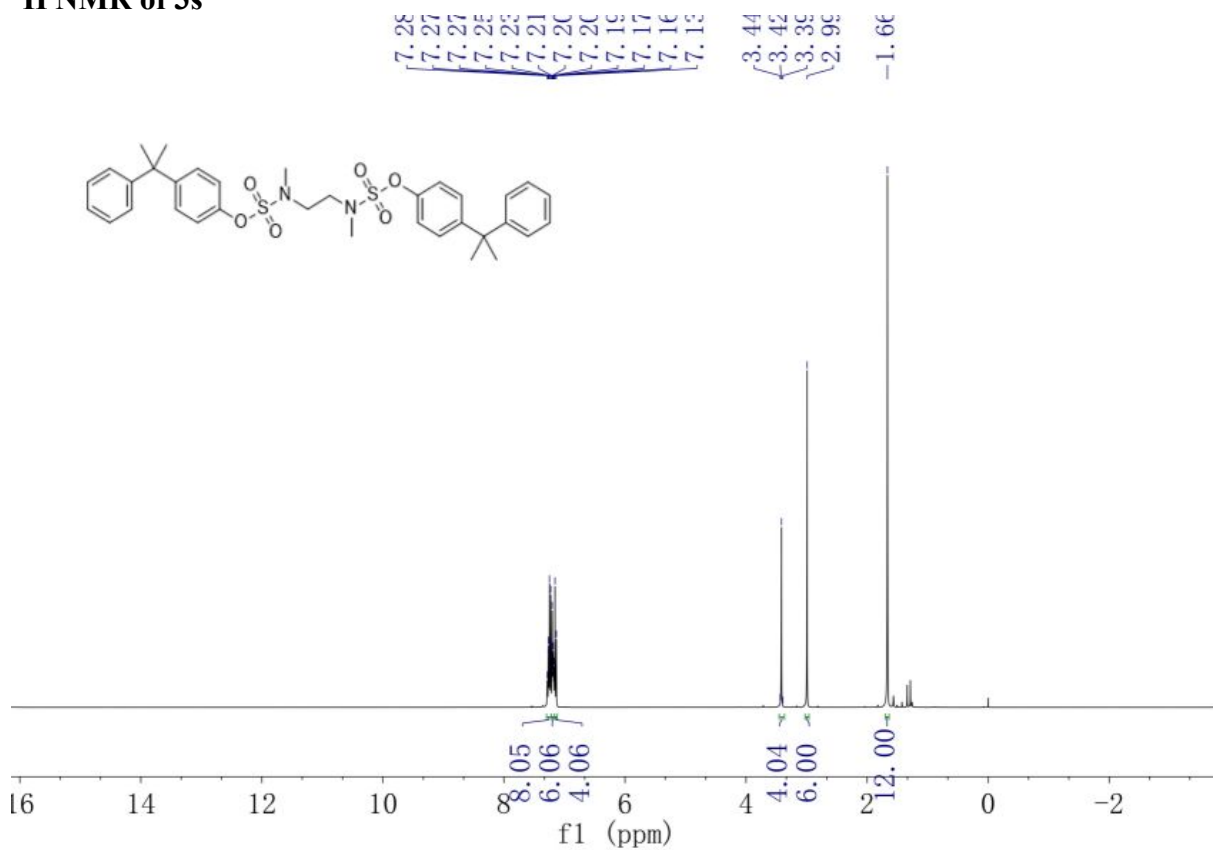



### <sup>13</sup>C NMR of 3s

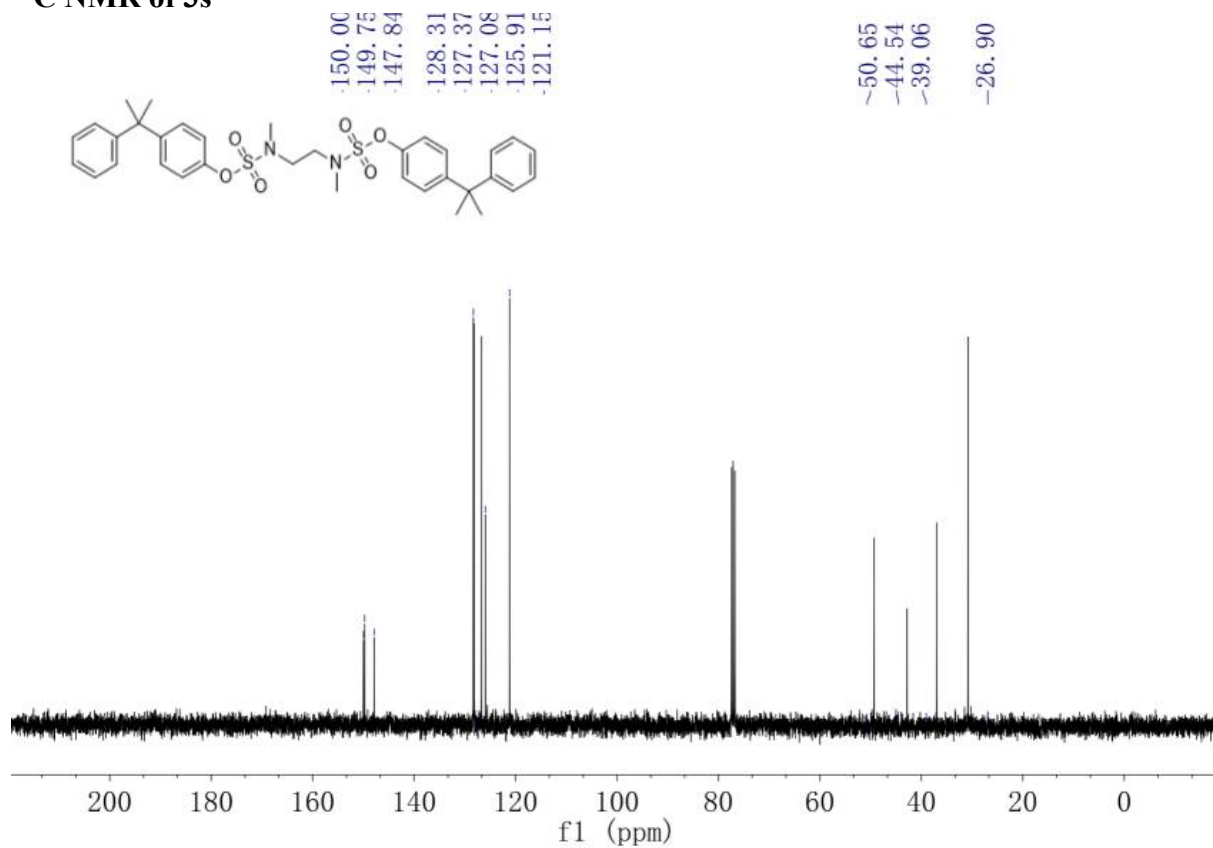

### <sup>1</sup>H NMR of A1

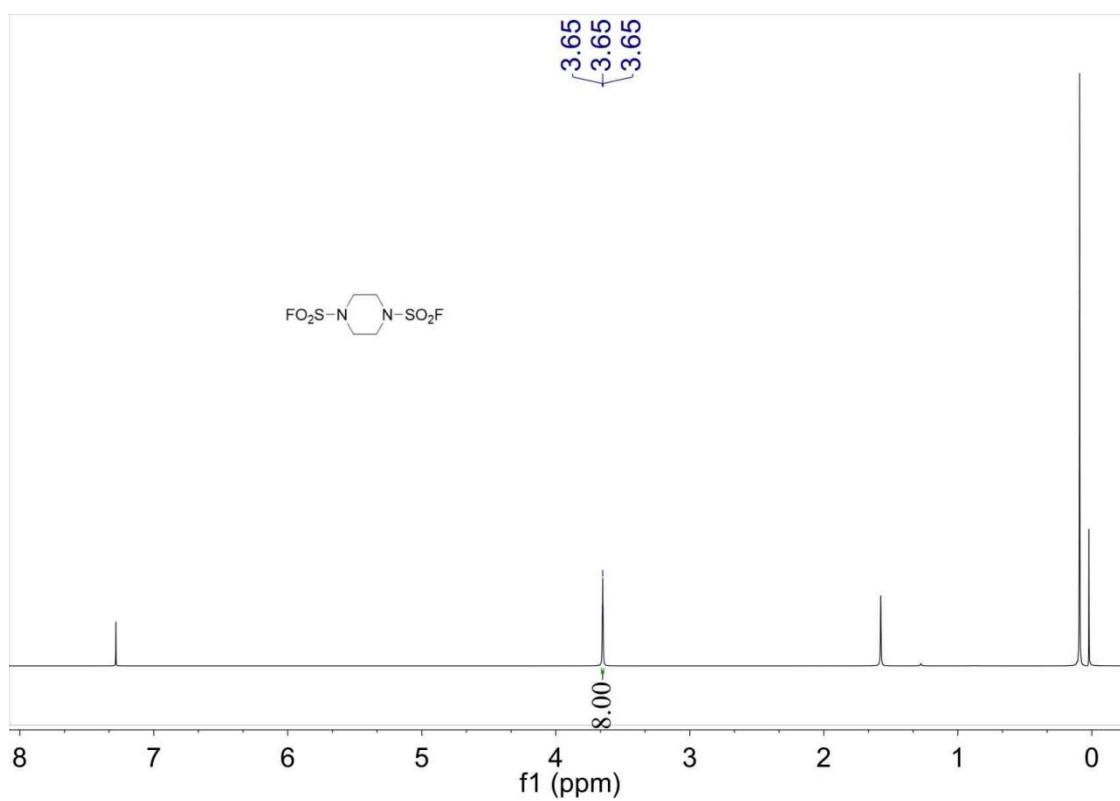

**<sup>13</sup>C NMR of A1**

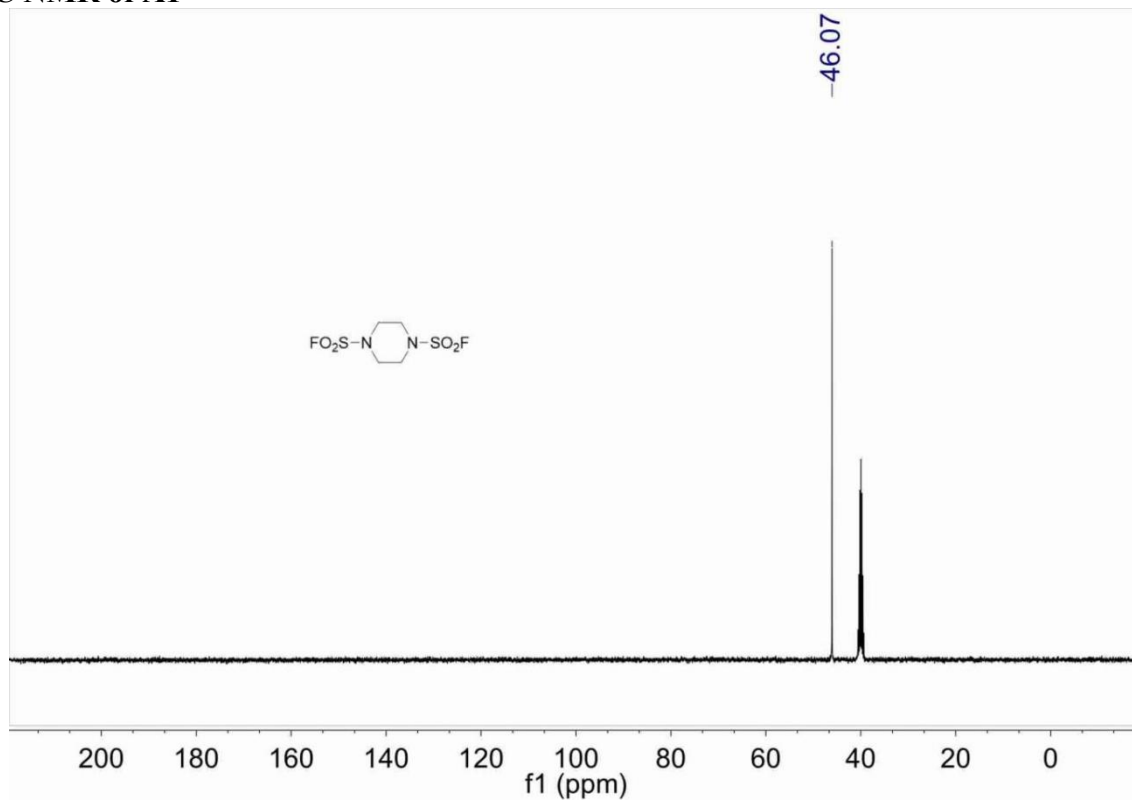

**<sup>19</sup>F NMR of A1**

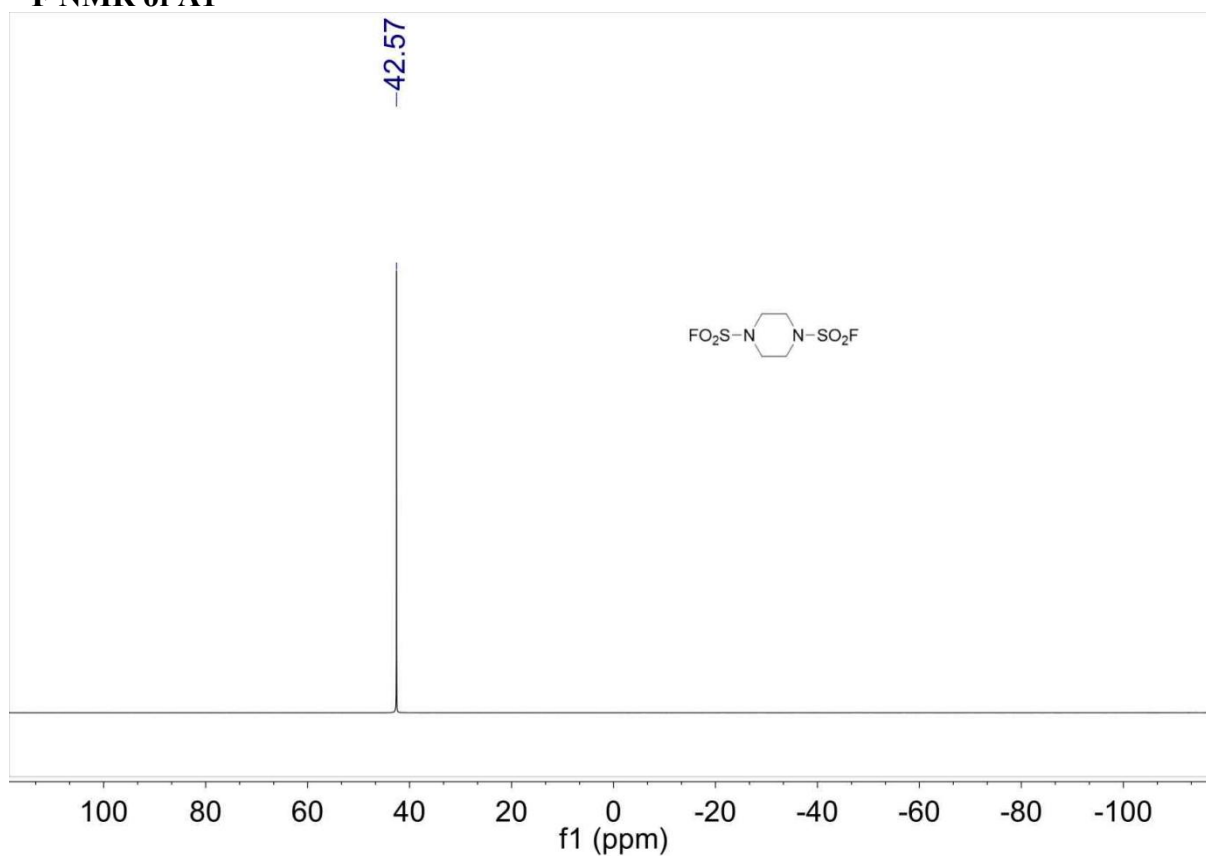

### <sup>1</sup>H NMR of A2

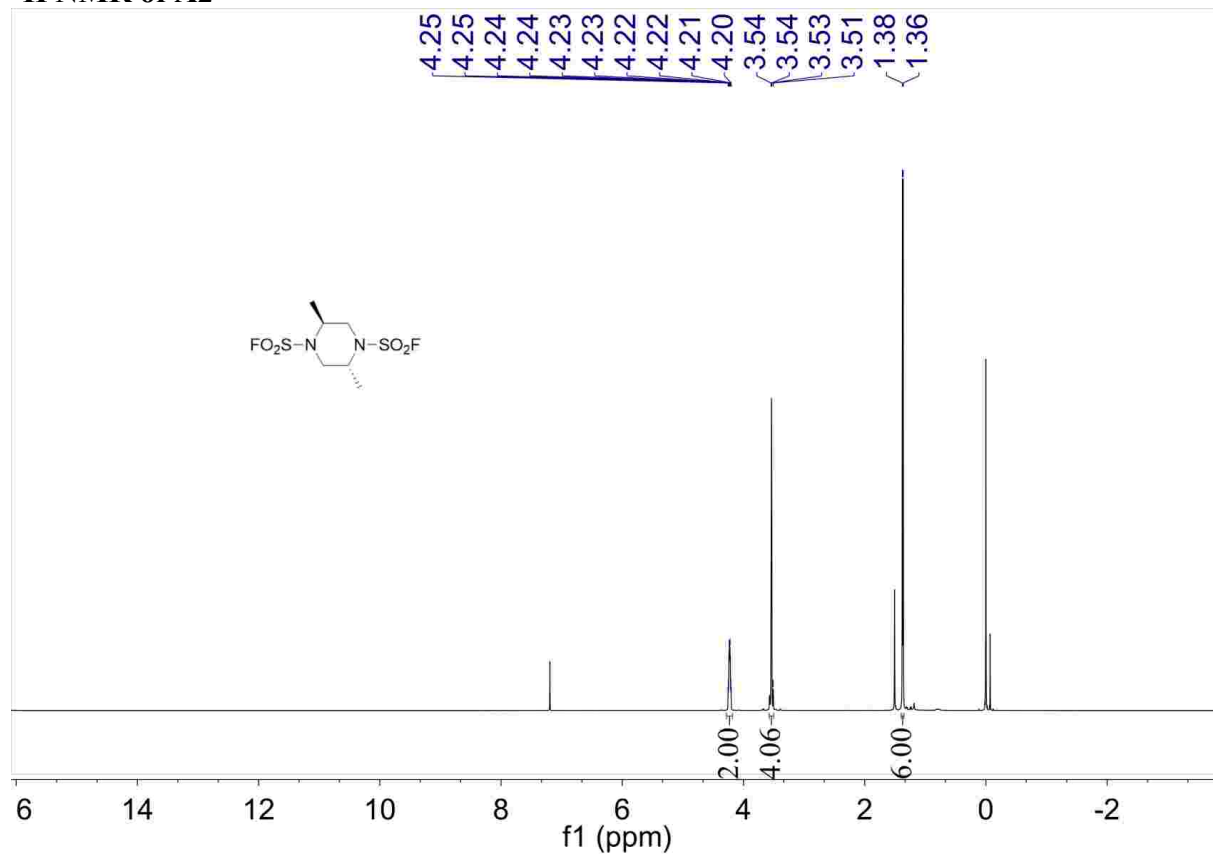

### <sup>13</sup>C NMR of A2

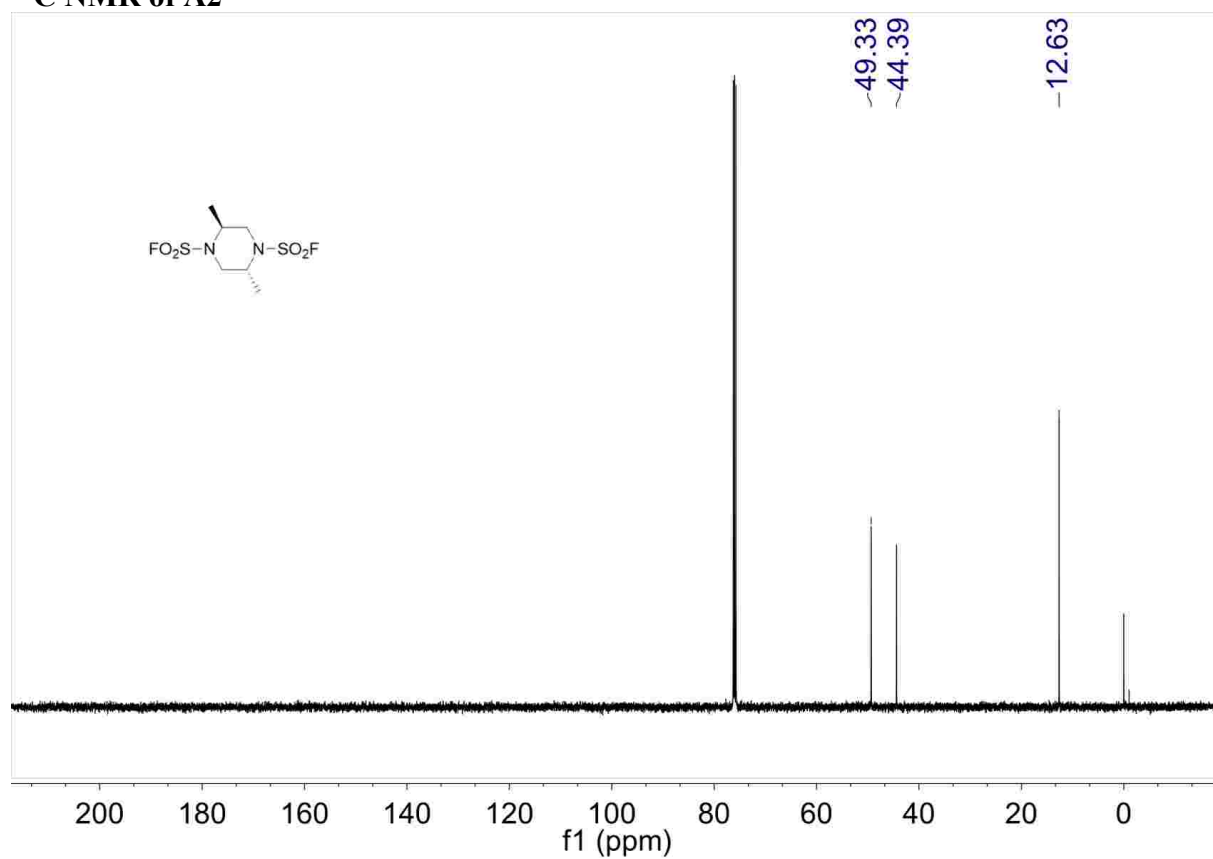

### <sup>19</sup>F NMR of A2

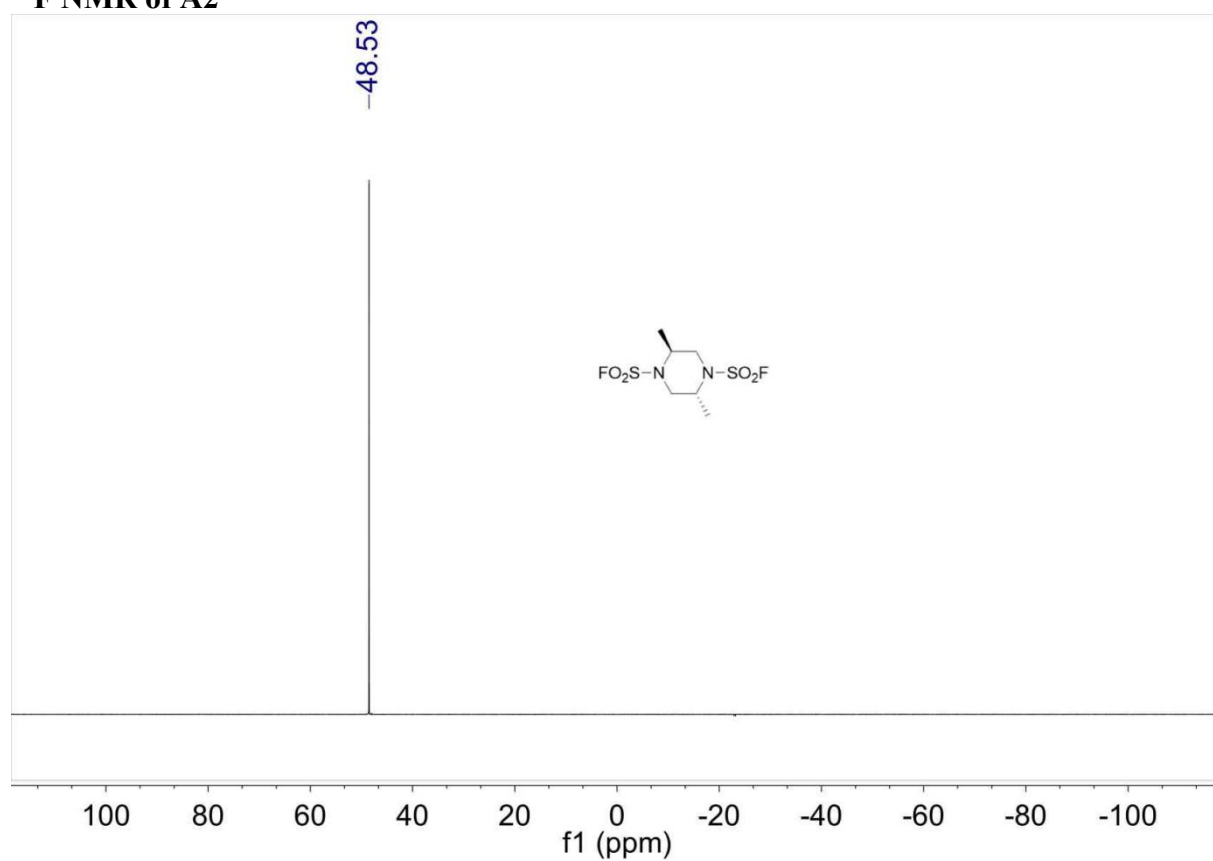

### <sup>1</sup>H NMR of A3

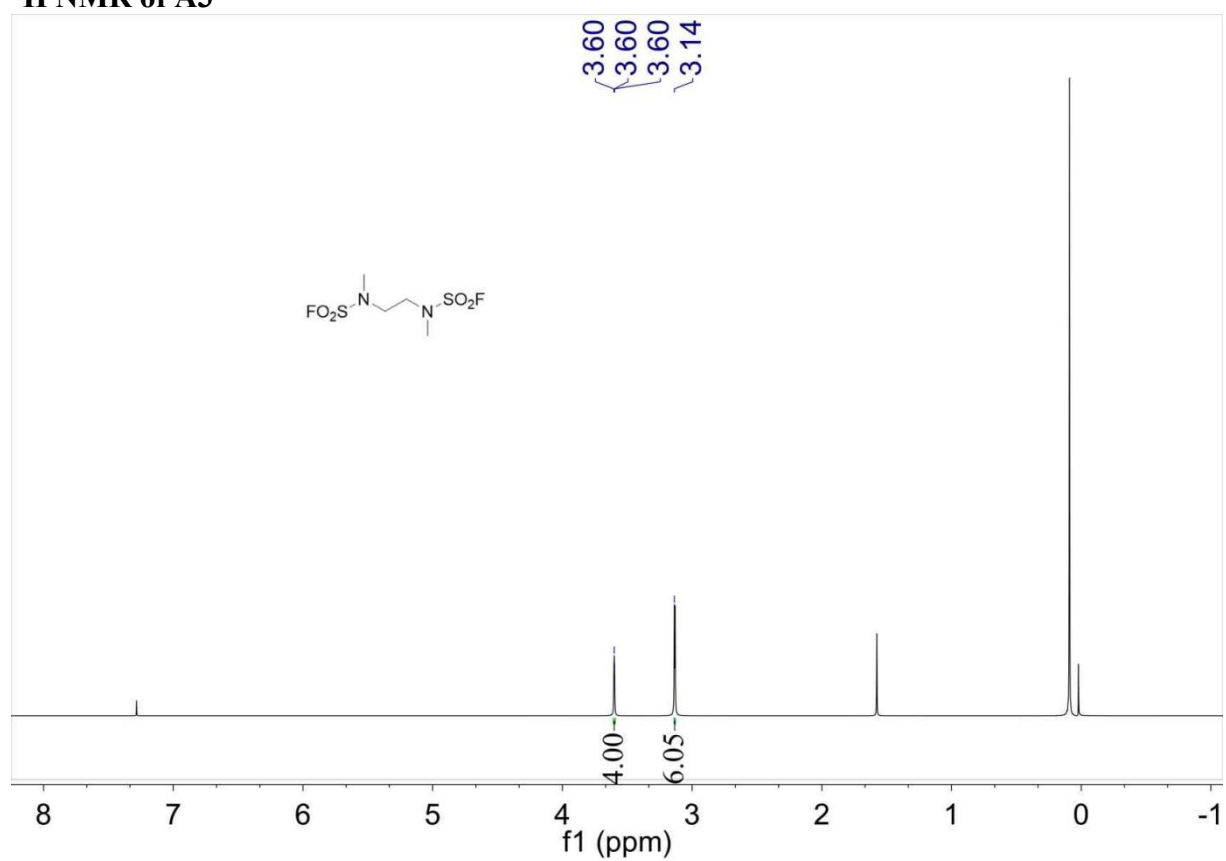

### <sup>13</sup>C NMR of A3

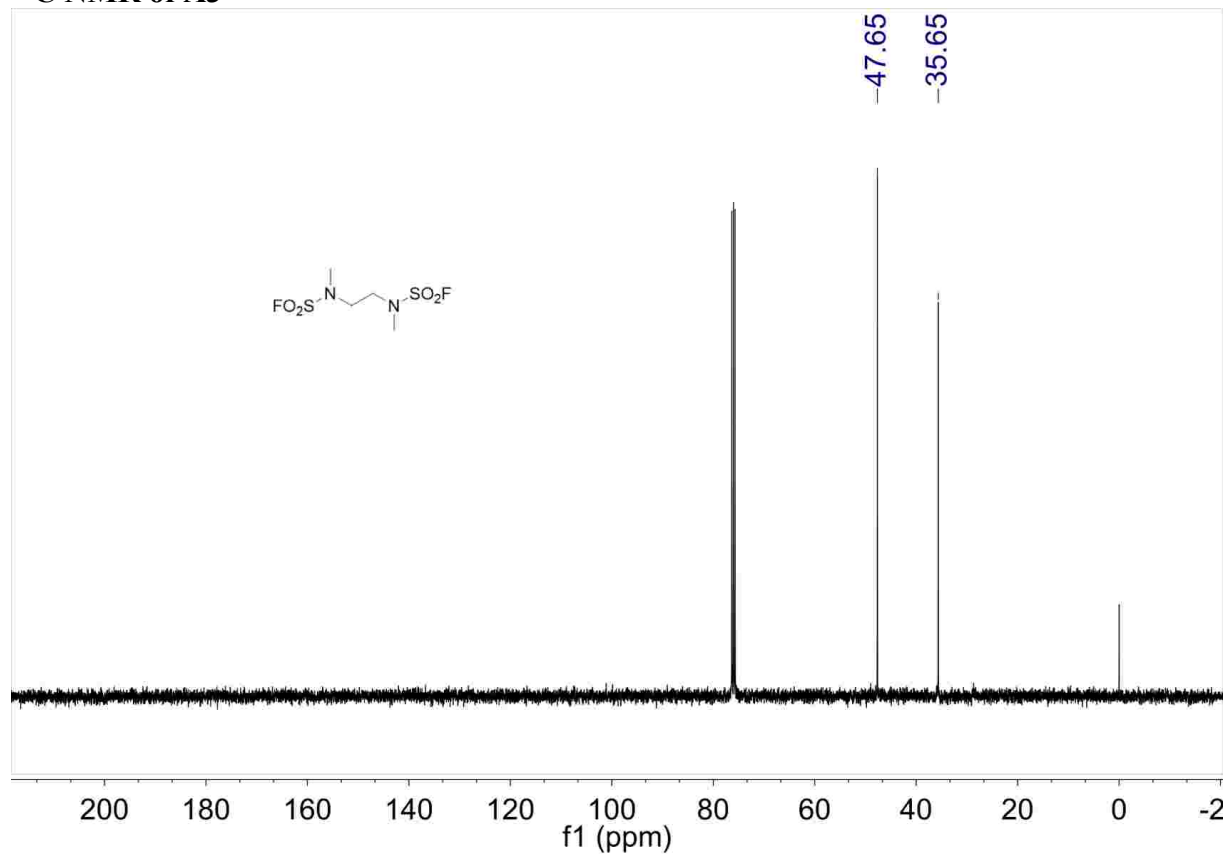

### <sup>19</sup>F NMR of A3

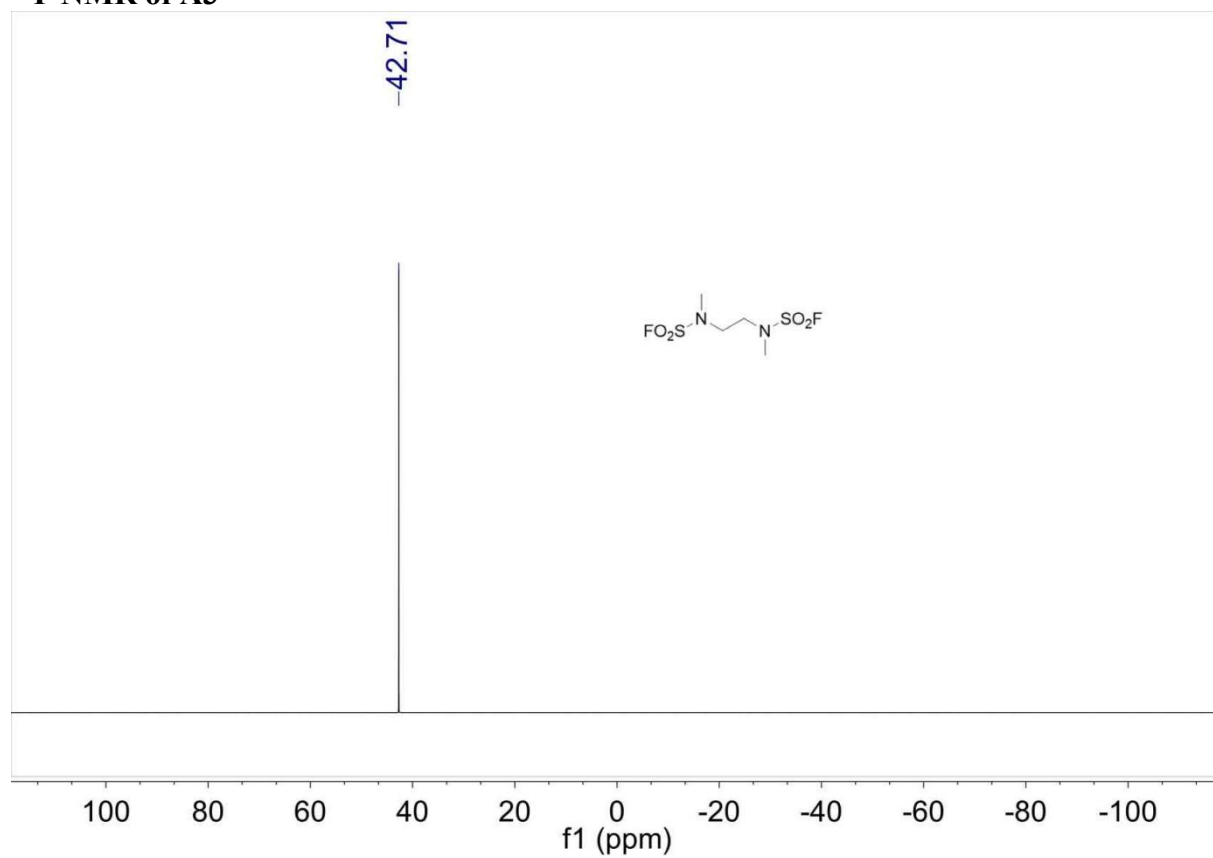

### <sup>1</sup>H NMR of A4

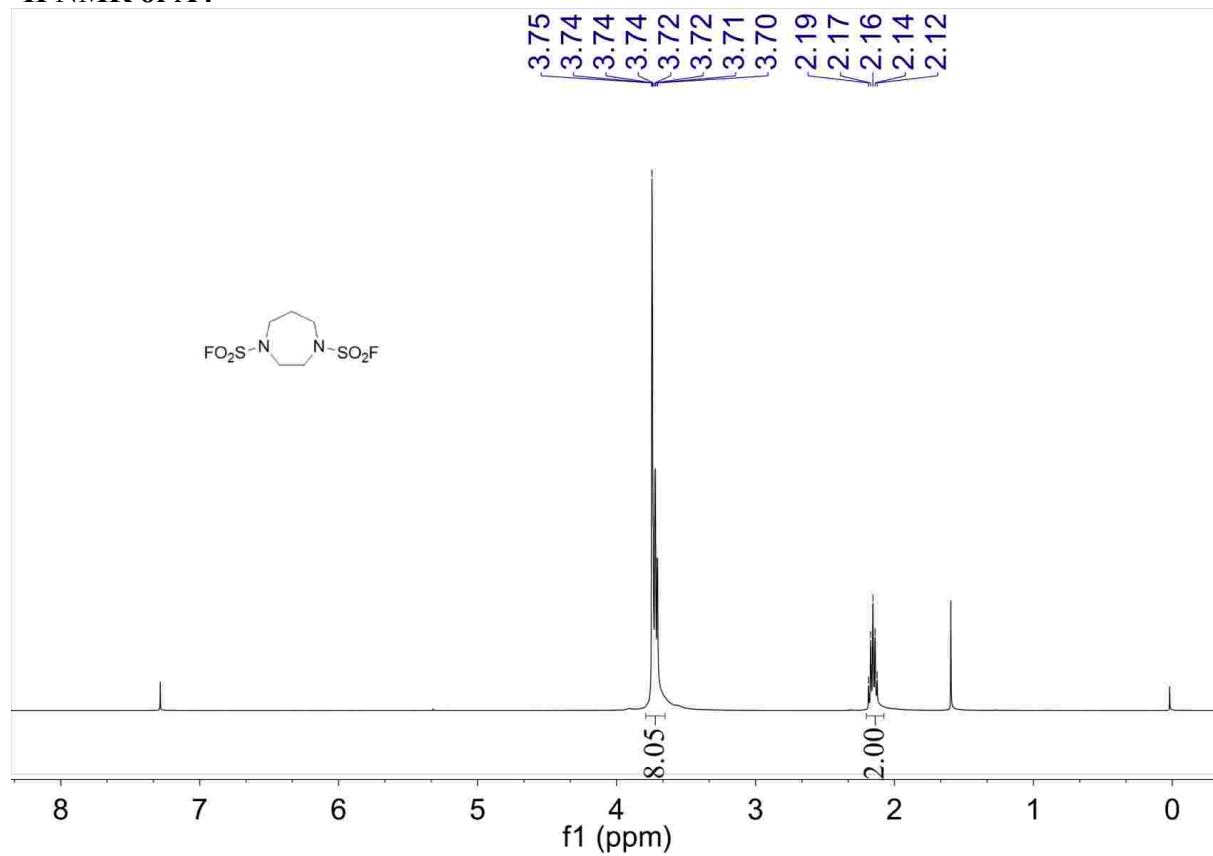

### <sup>13</sup>C NMR of A4

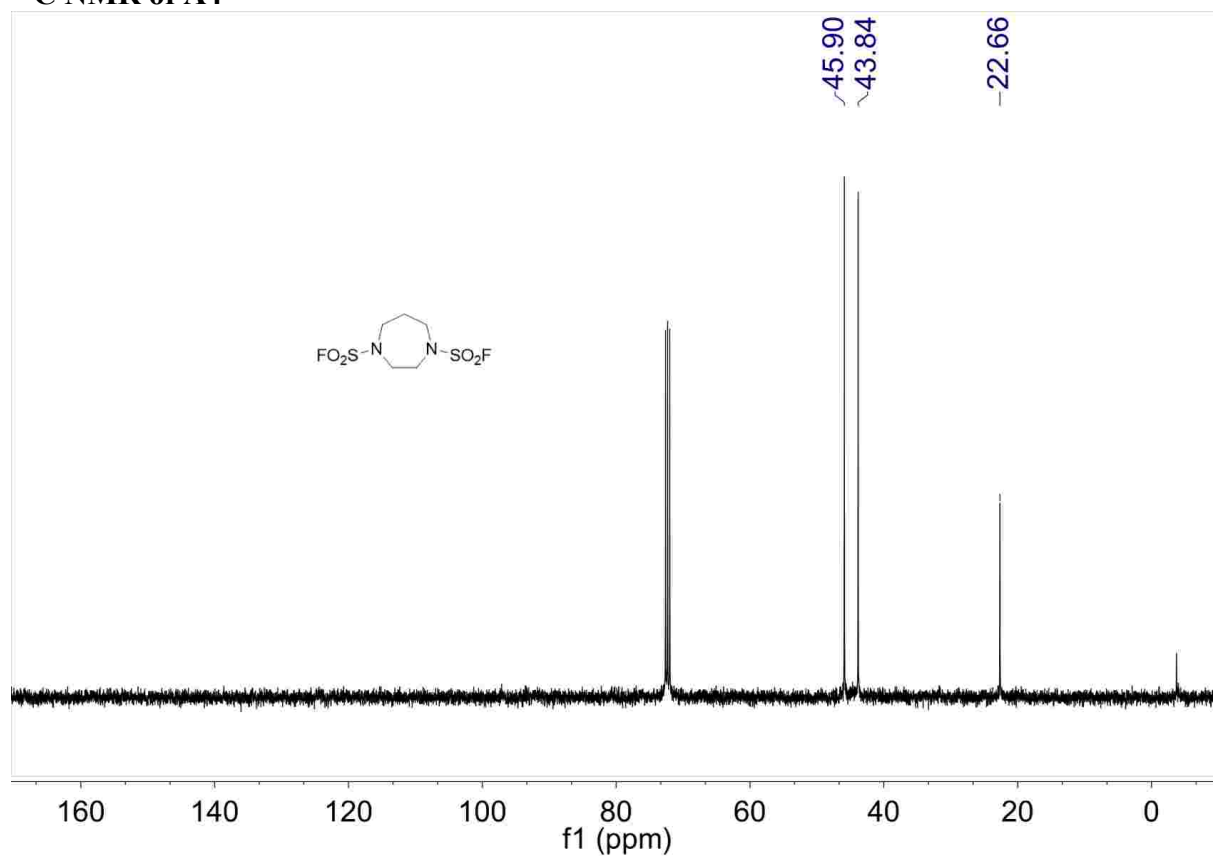

### <sup>19</sup>F NMR of A4

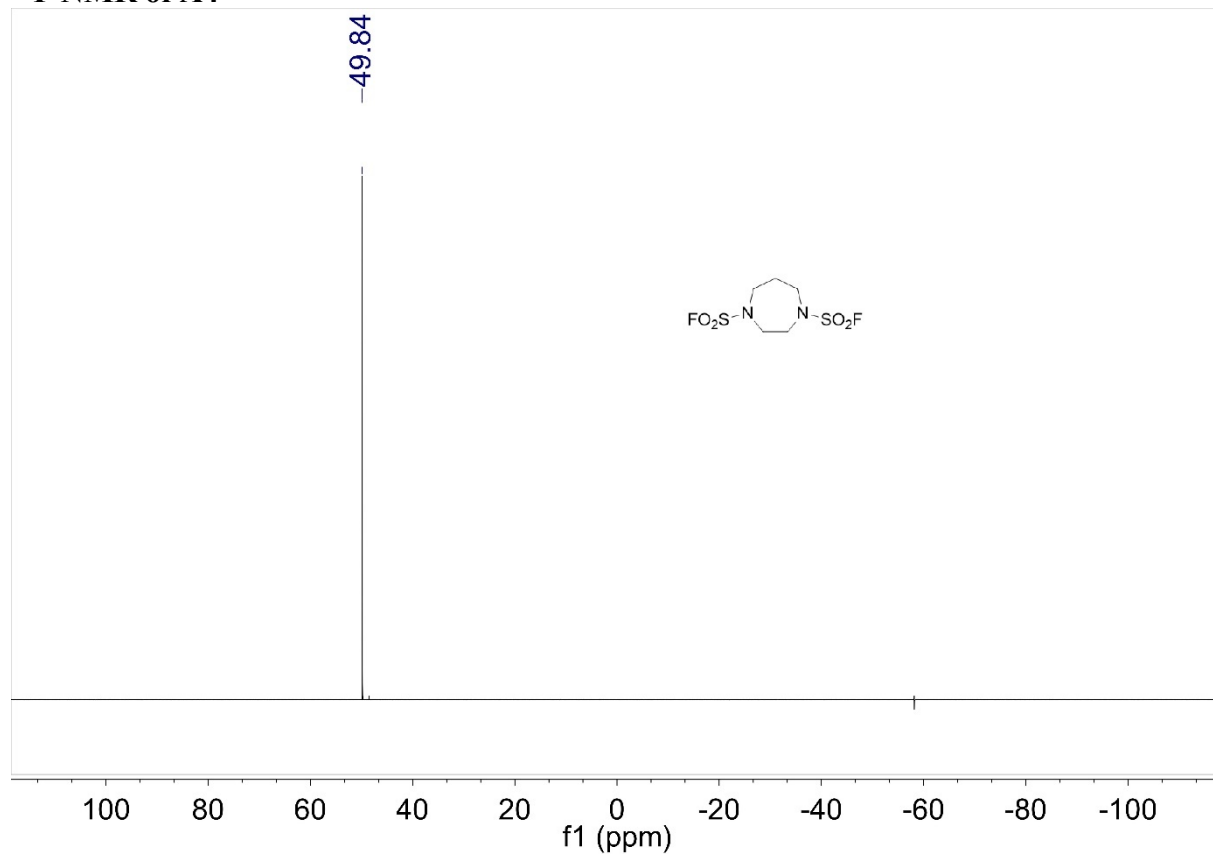

## 7.2 Copies of the NMR spectra of polymers

### <sup>1</sup>H NMR of P1

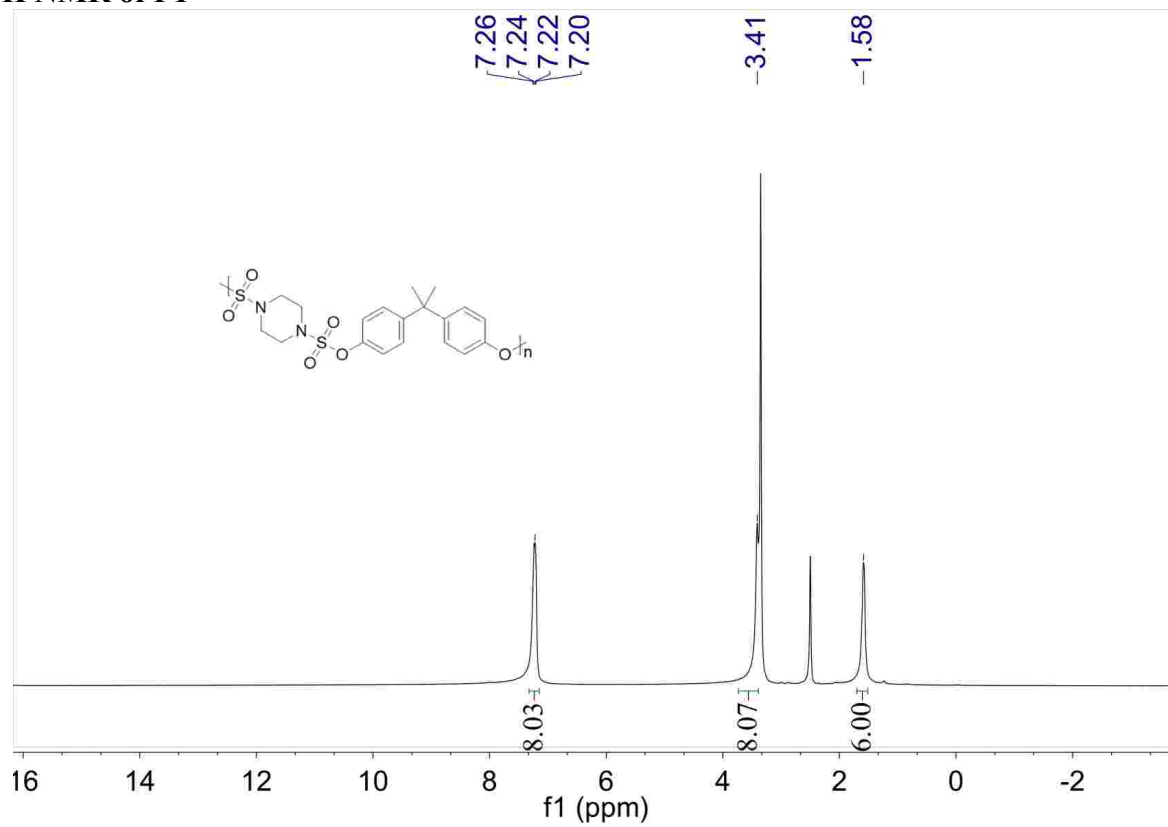

### <sup>13</sup>C NMR of P1

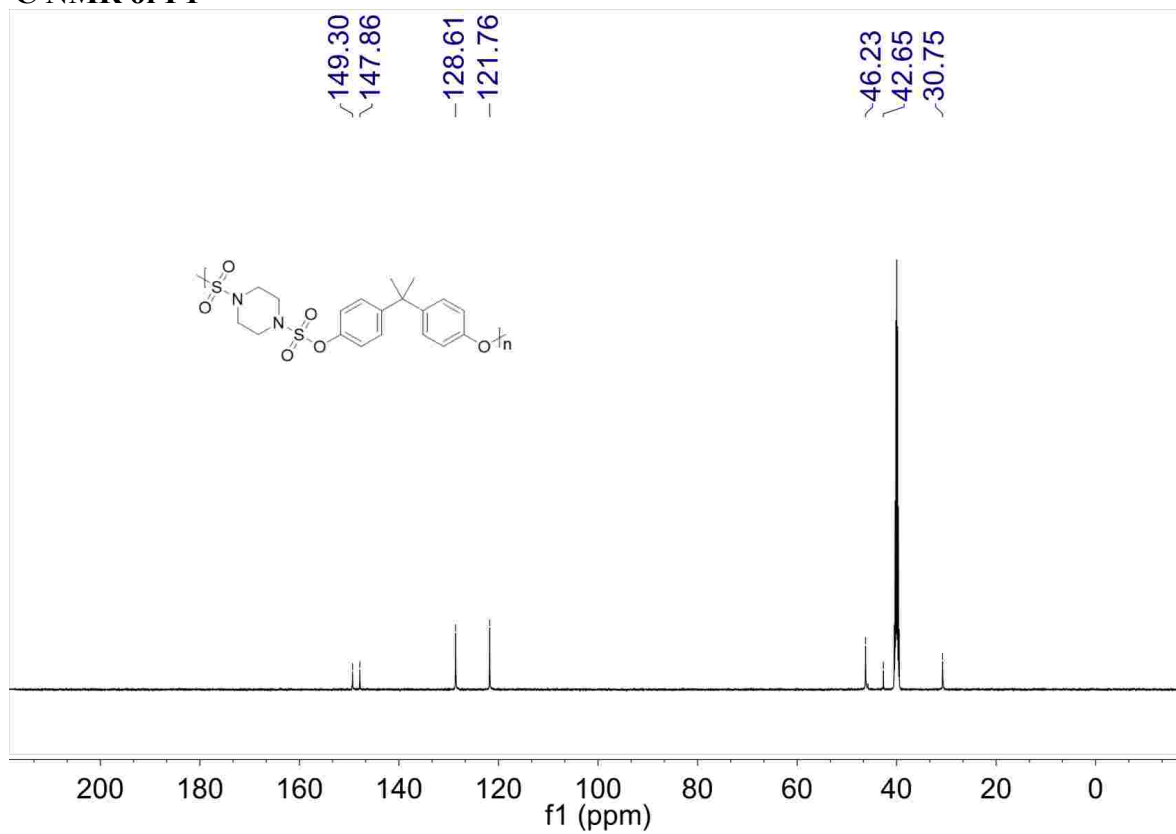

### <sup>1</sup>H NMR of P2

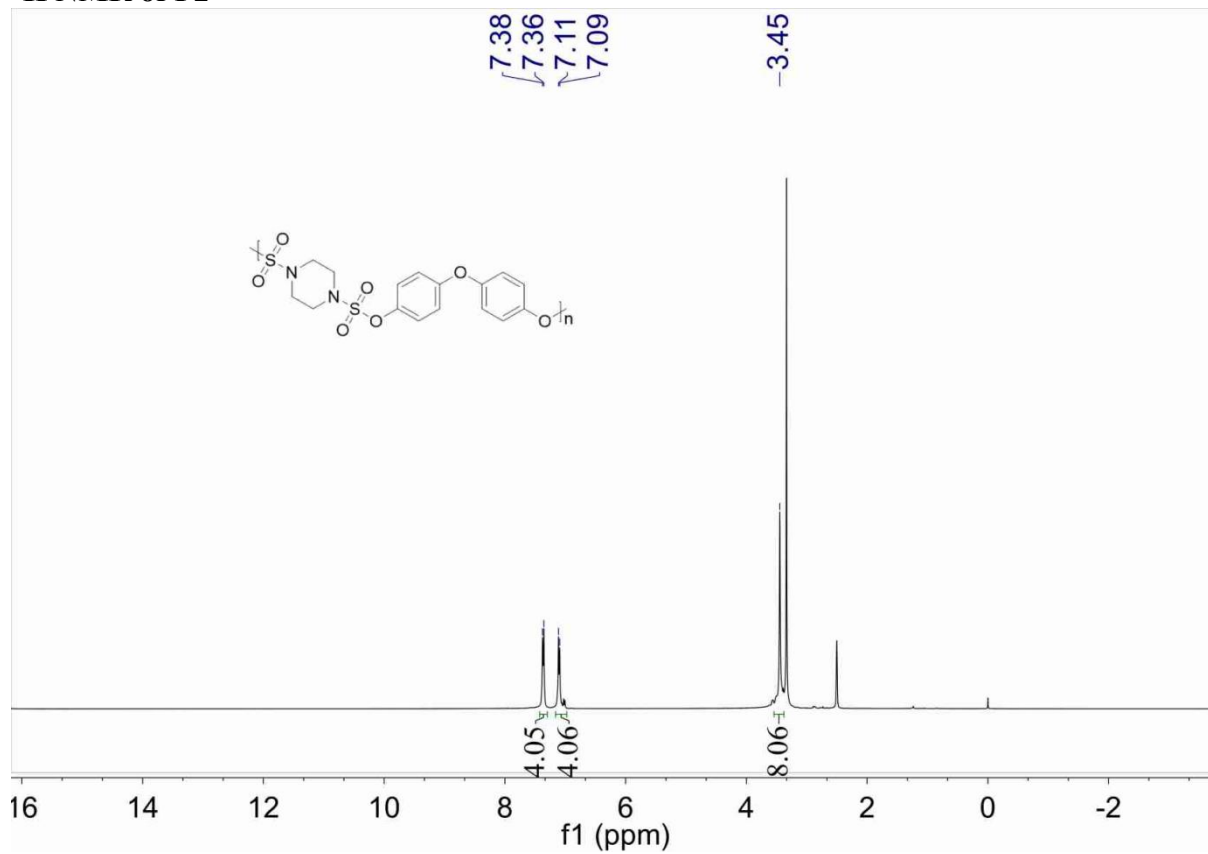



### <sup>13</sup>C NMR of P2

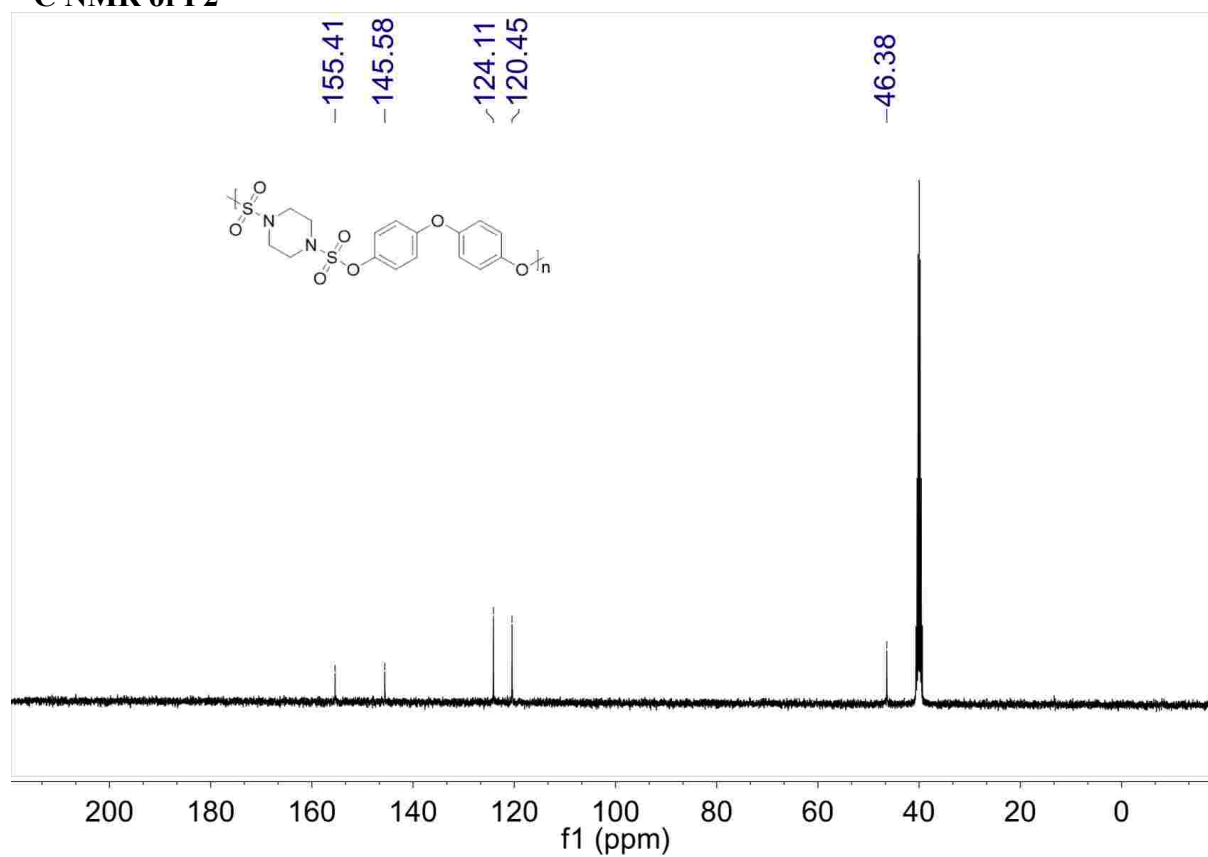

### <sup>1</sup>H NMR of P3

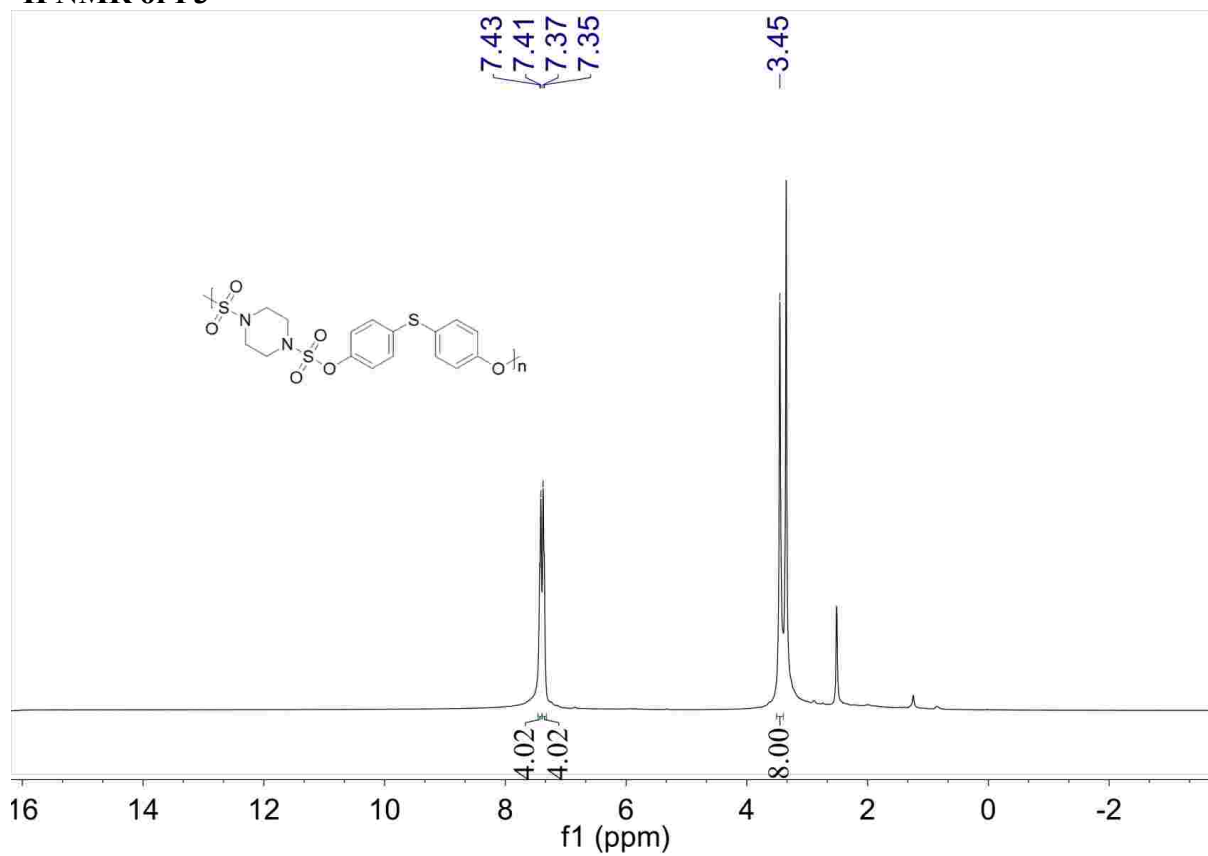

### <sup>13</sup>C NMR of P3

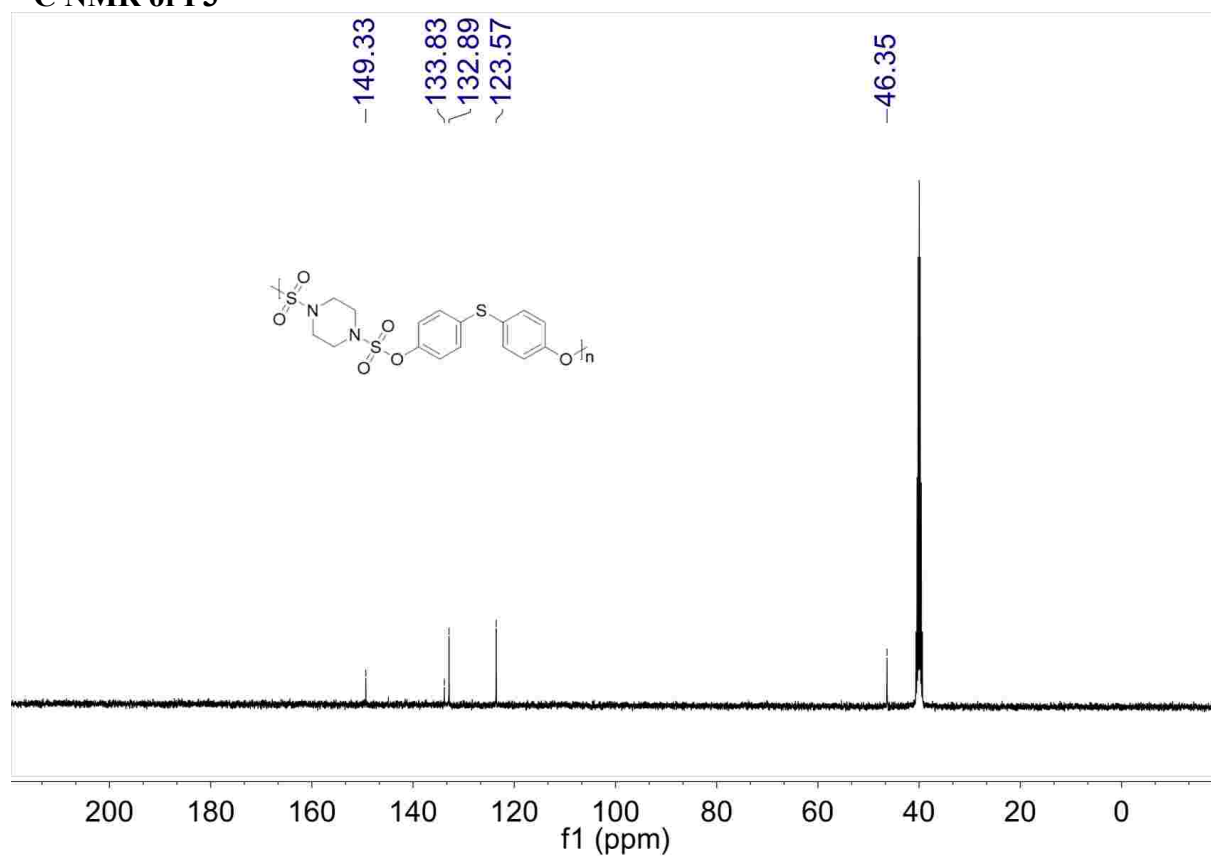

### <sup>1</sup>H NMR of P4

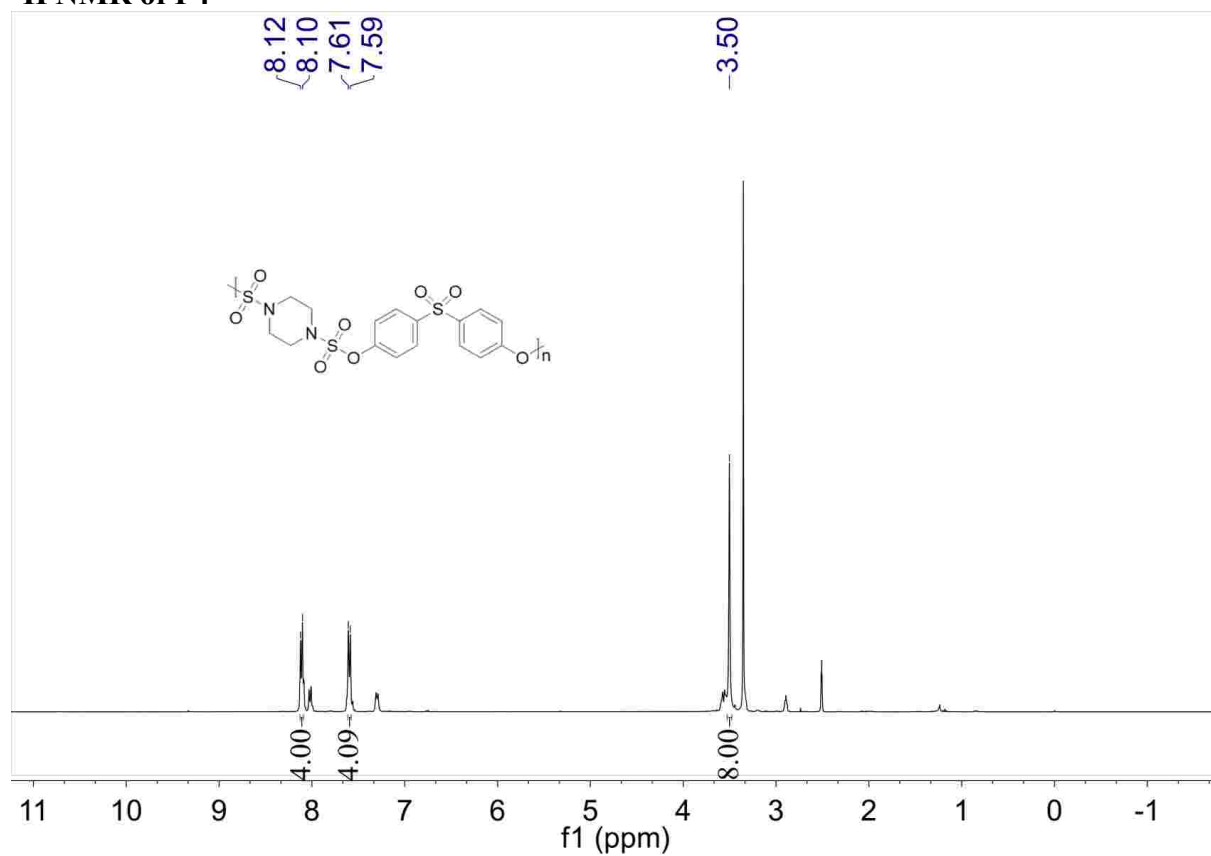

### <sup>13</sup>C NMR of P4

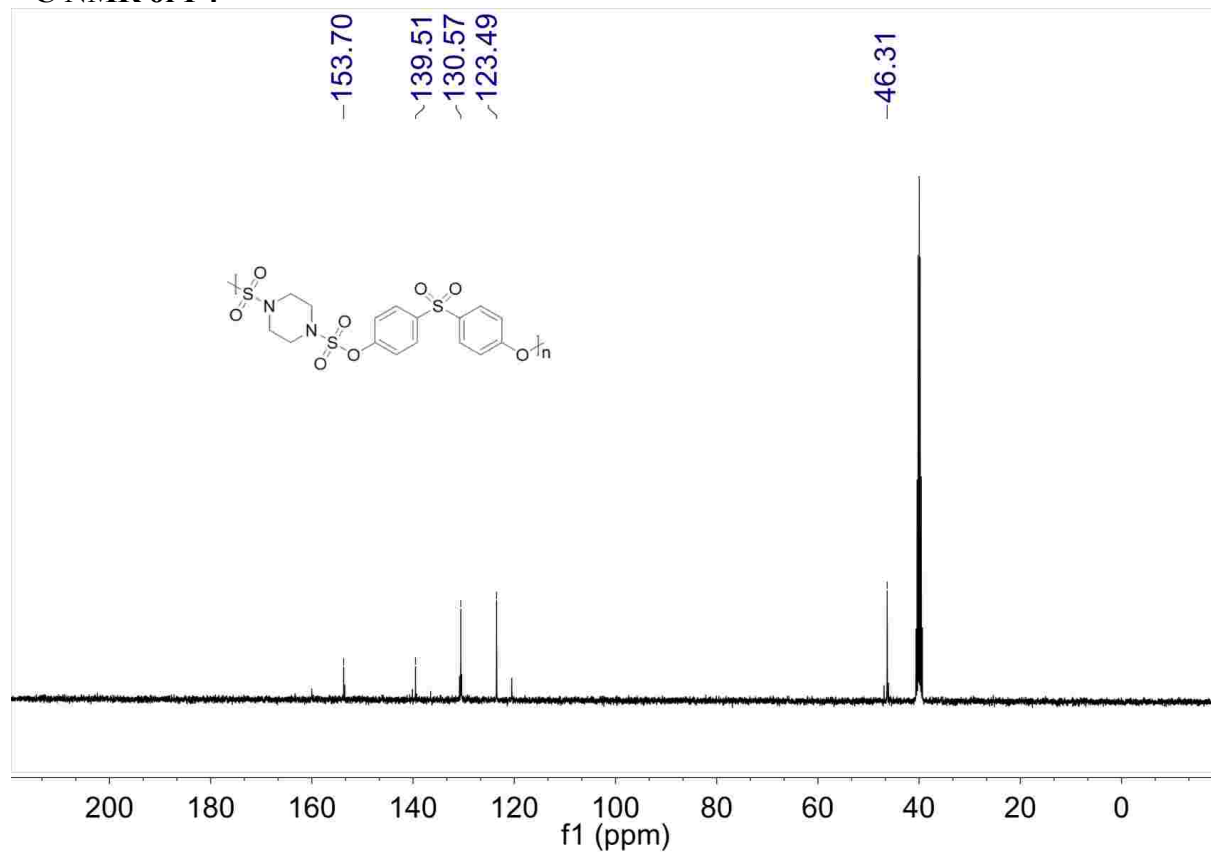

### <sup>1</sup>H NMR of P5

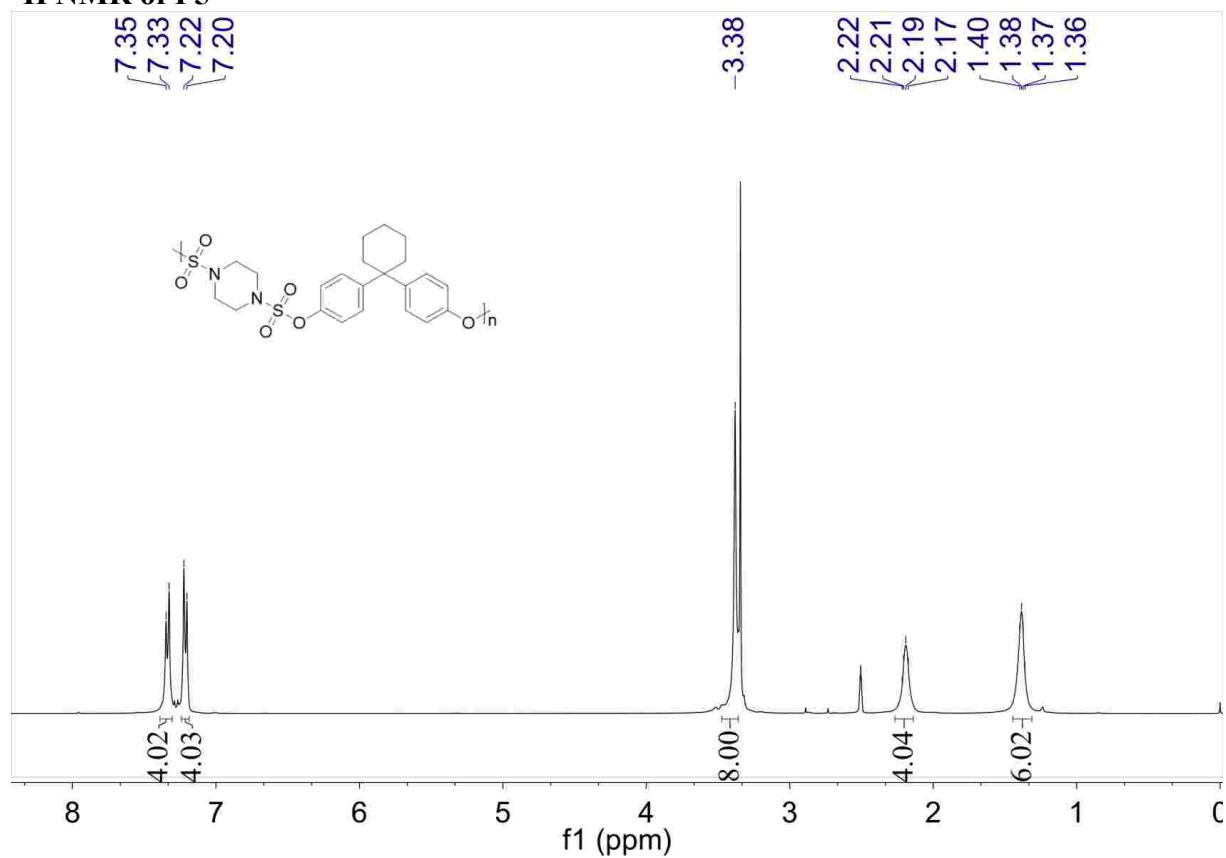

### <sup>13</sup>C NMR of P5

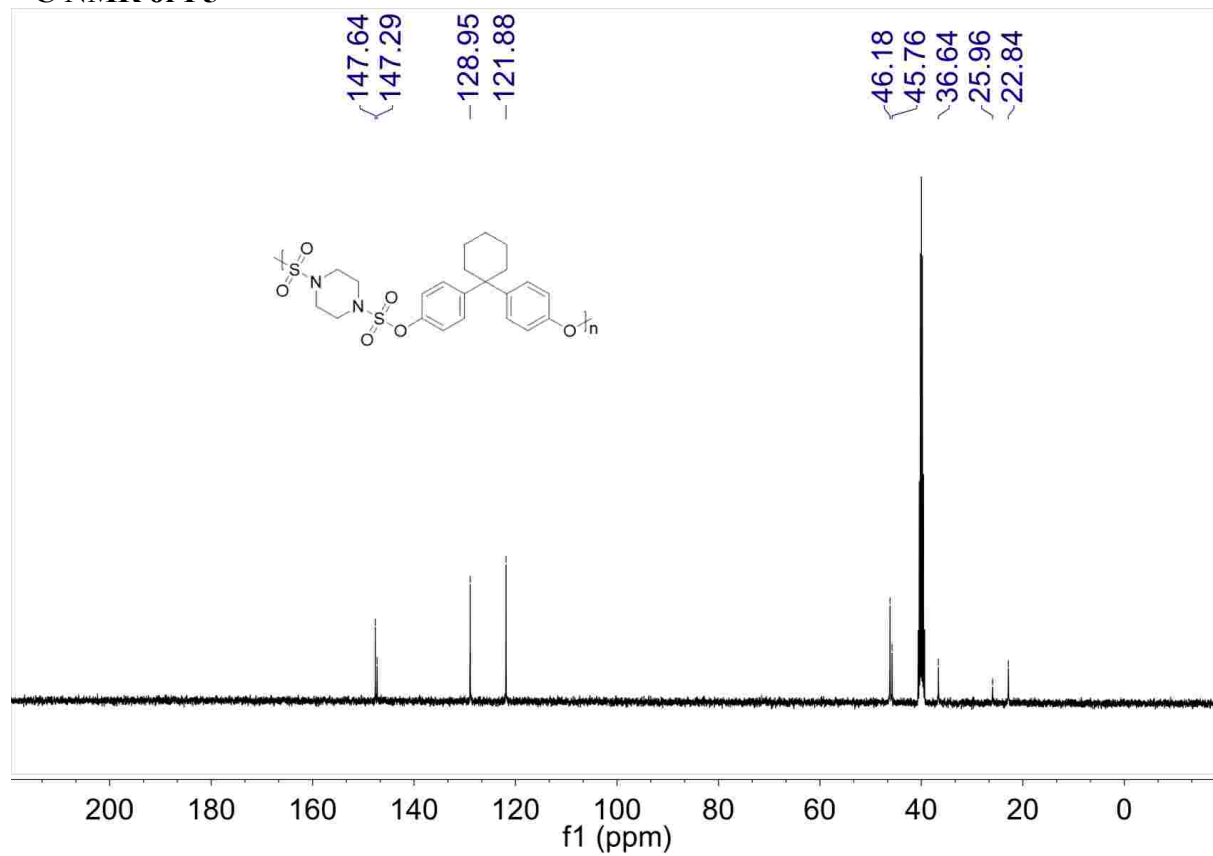

### <sup>1</sup>H NMR of P6

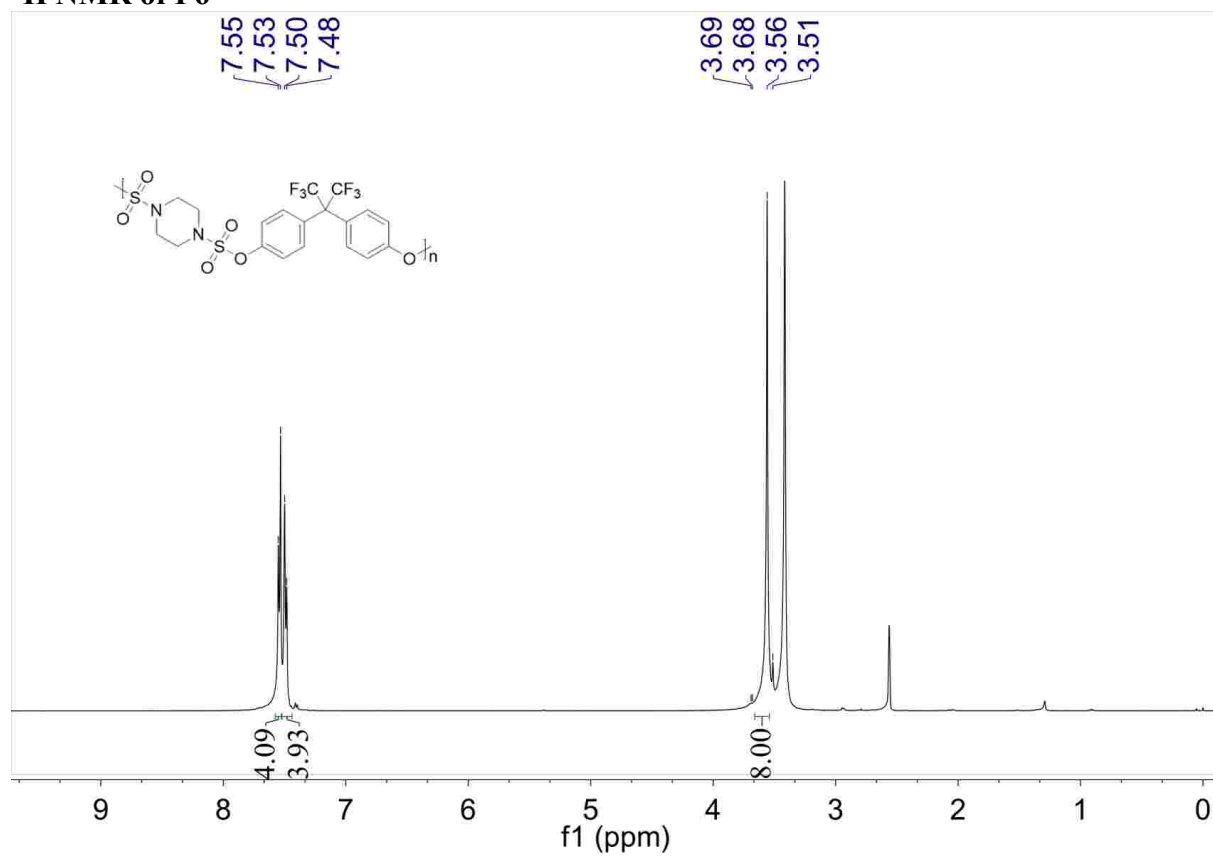

### <sup>13</sup>C NMR of P6

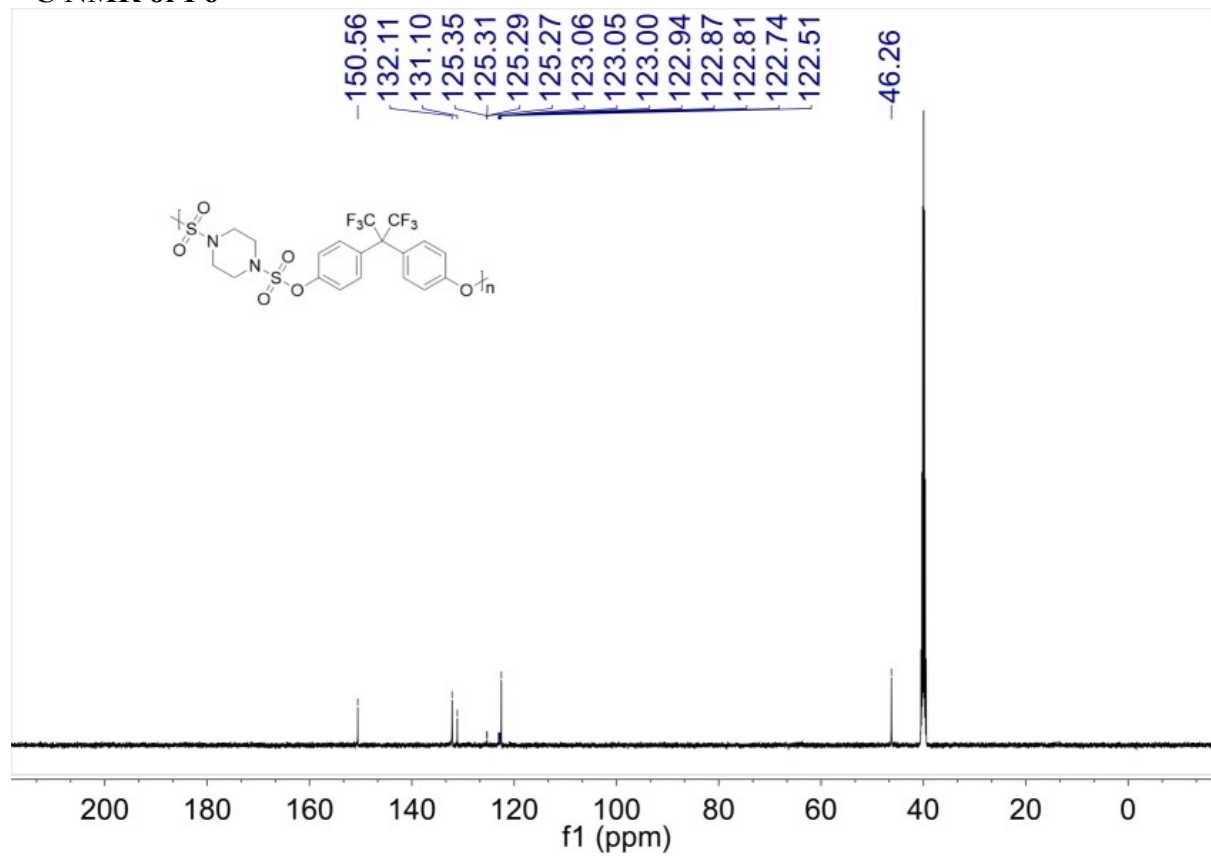

### <sup>1</sup>H NMR of P7

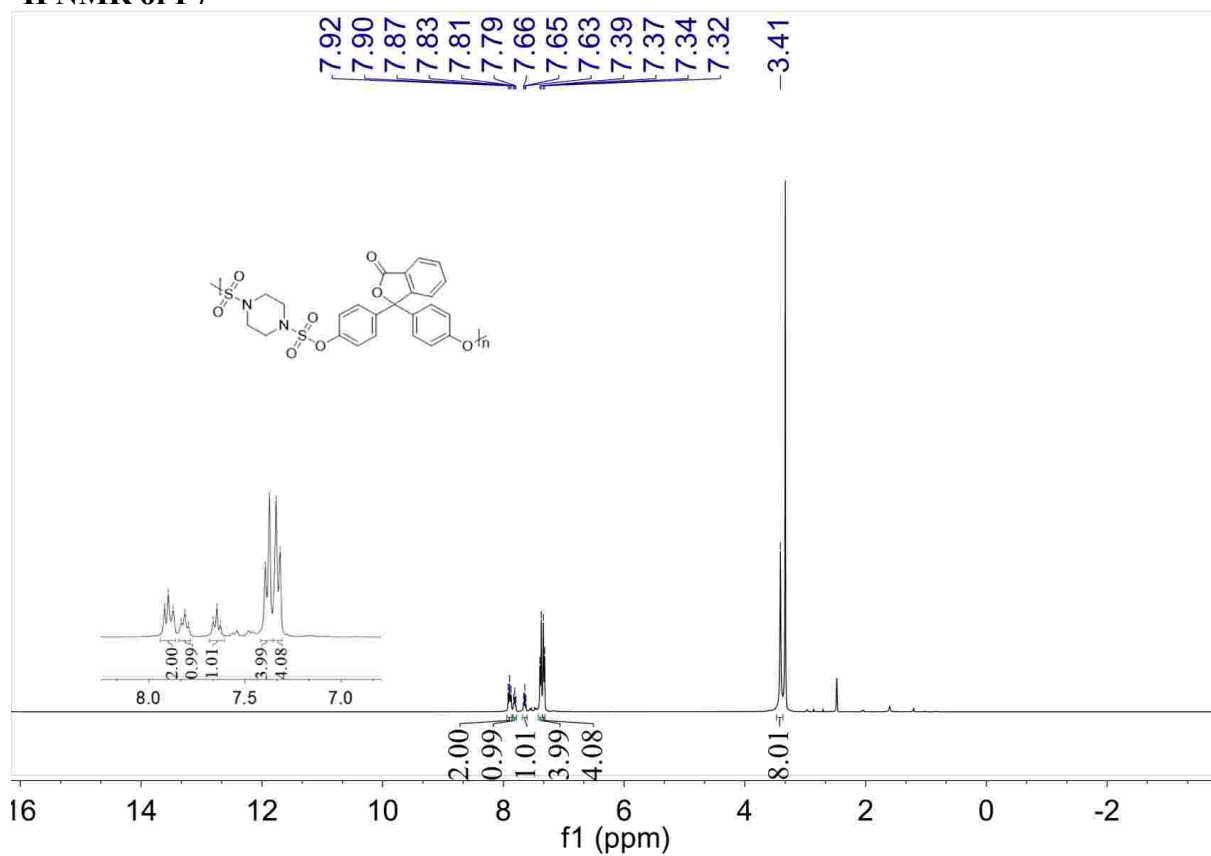

### <sup>13</sup>C NMR of P7

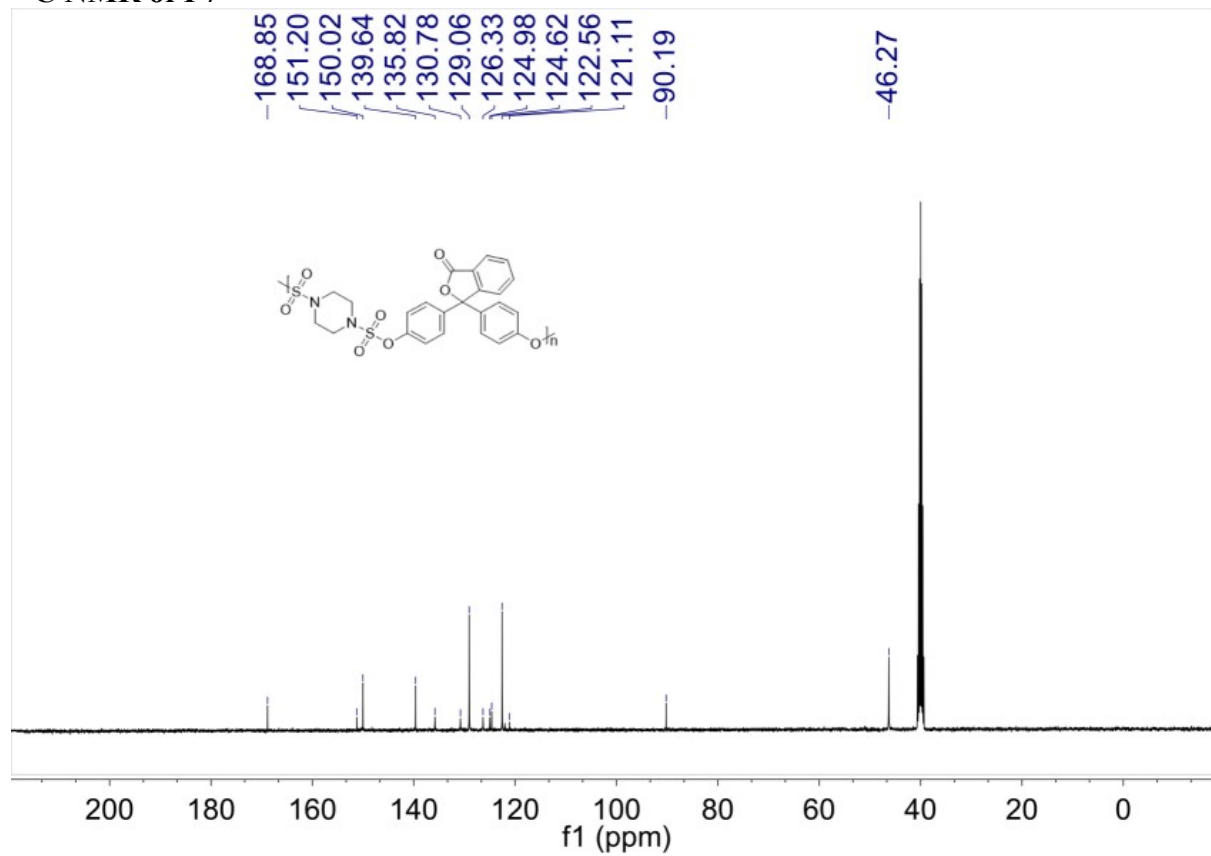

### <sup>1</sup>H NMR of P8

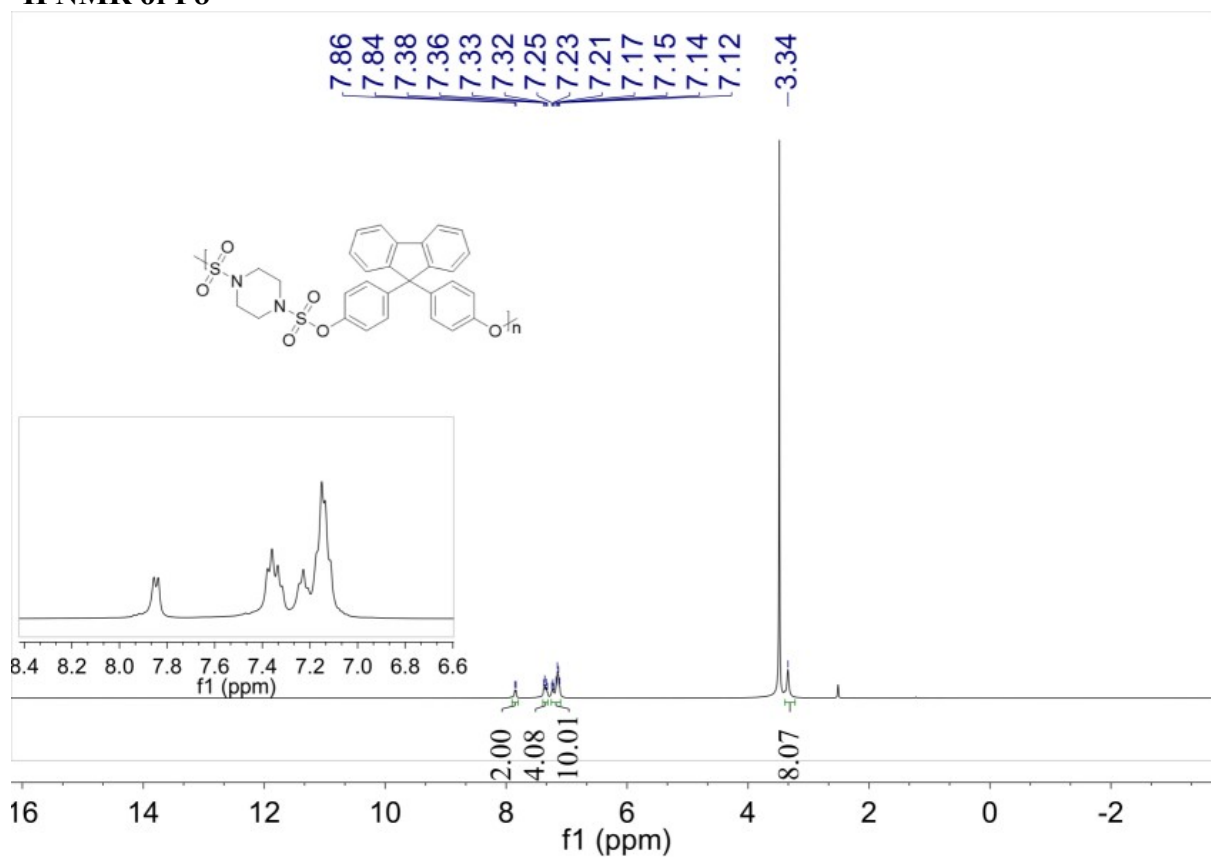

### <sup>13</sup>C NMR of P8

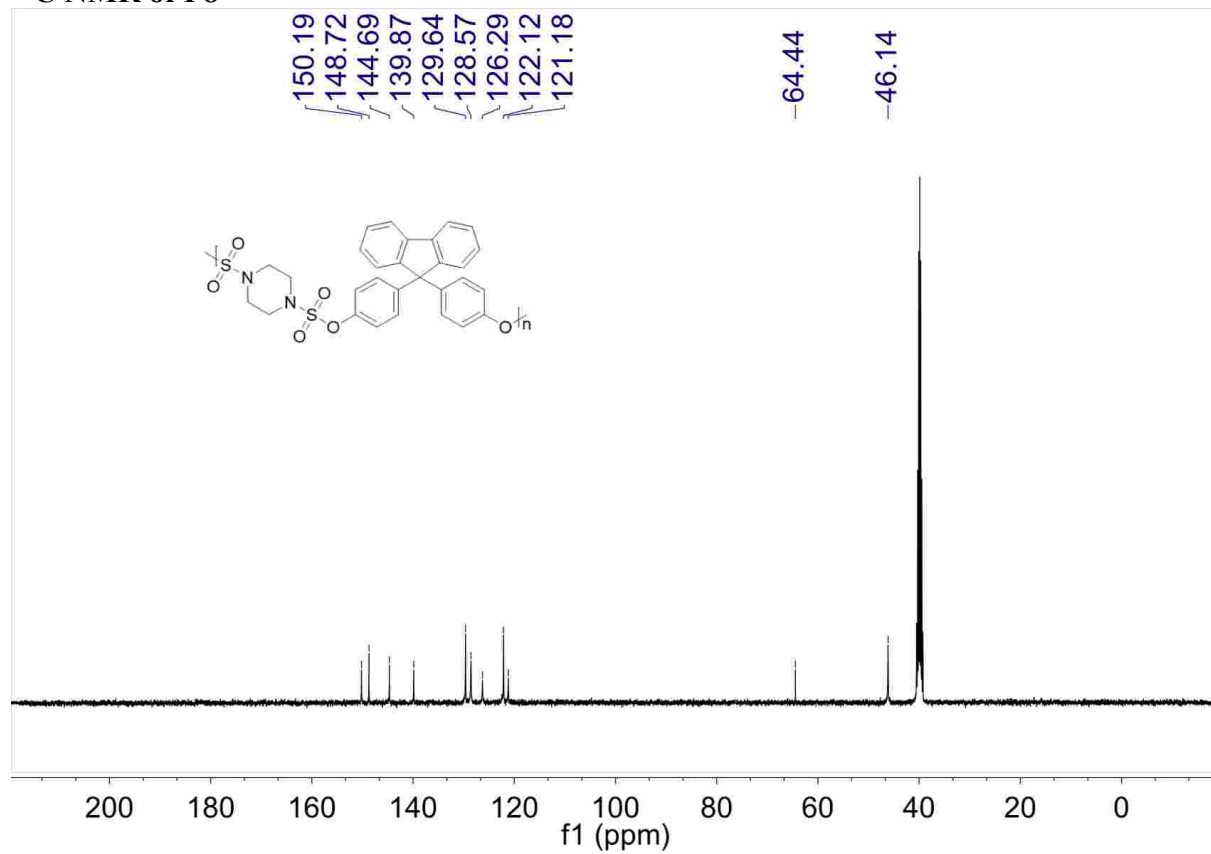

### <sup>1</sup>H NMR of P9

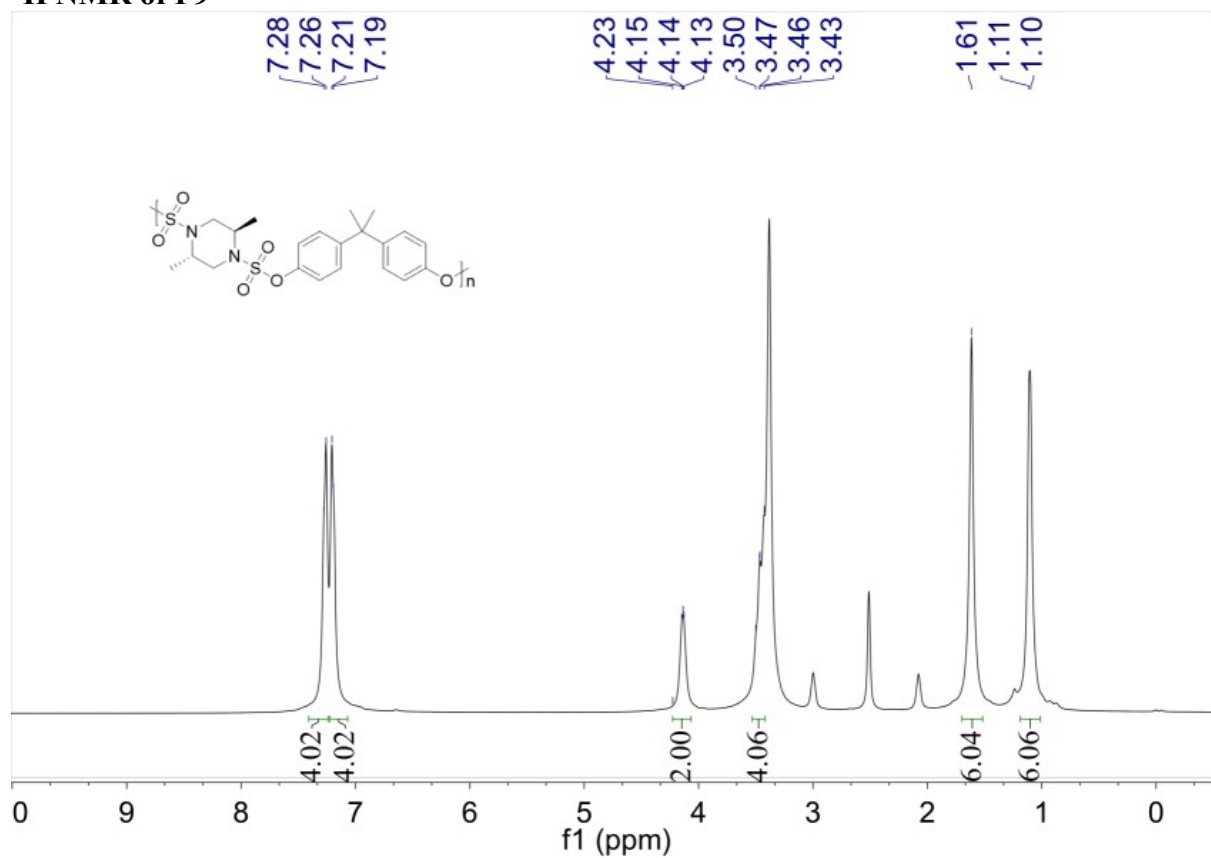

### <sup>13</sup>C NMR of P9

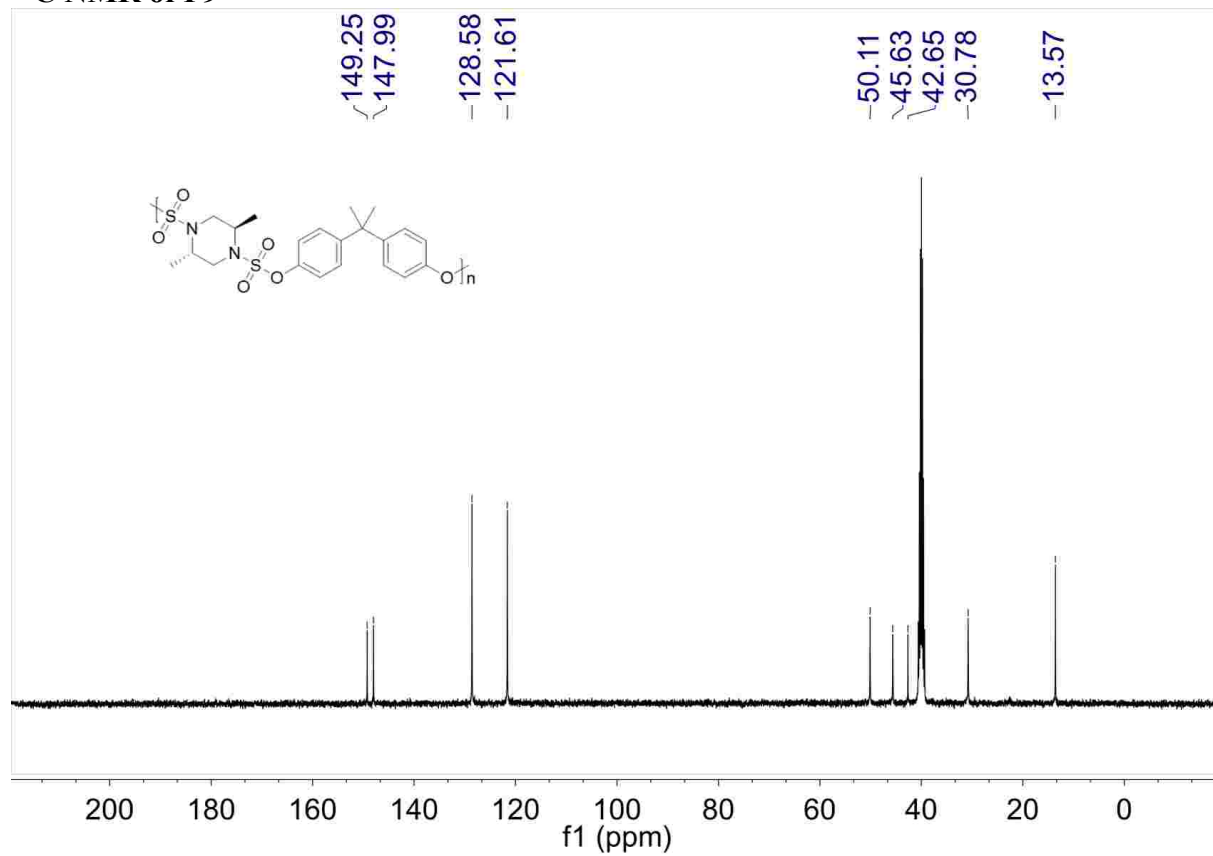

### <sup>1</sup>H NMR of P10

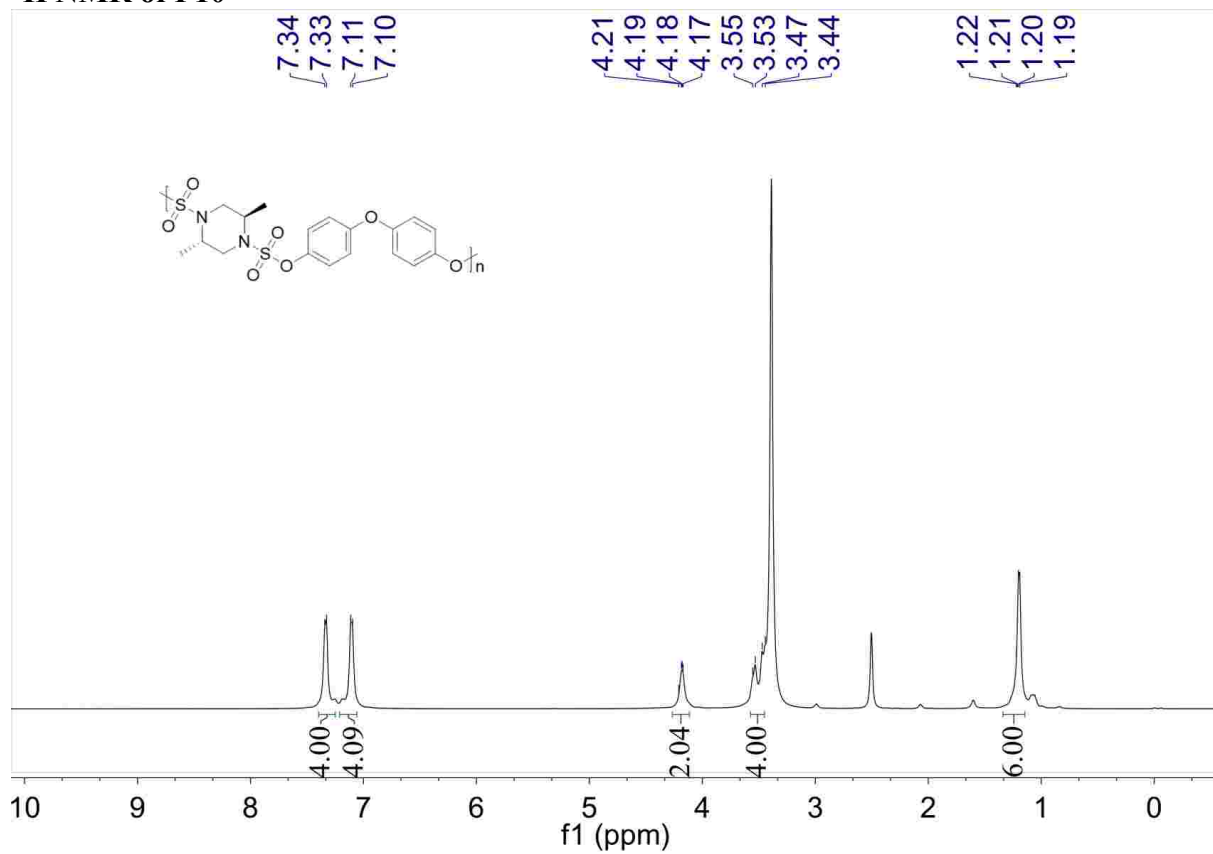



### <sup>13</sup>C NMR of P10

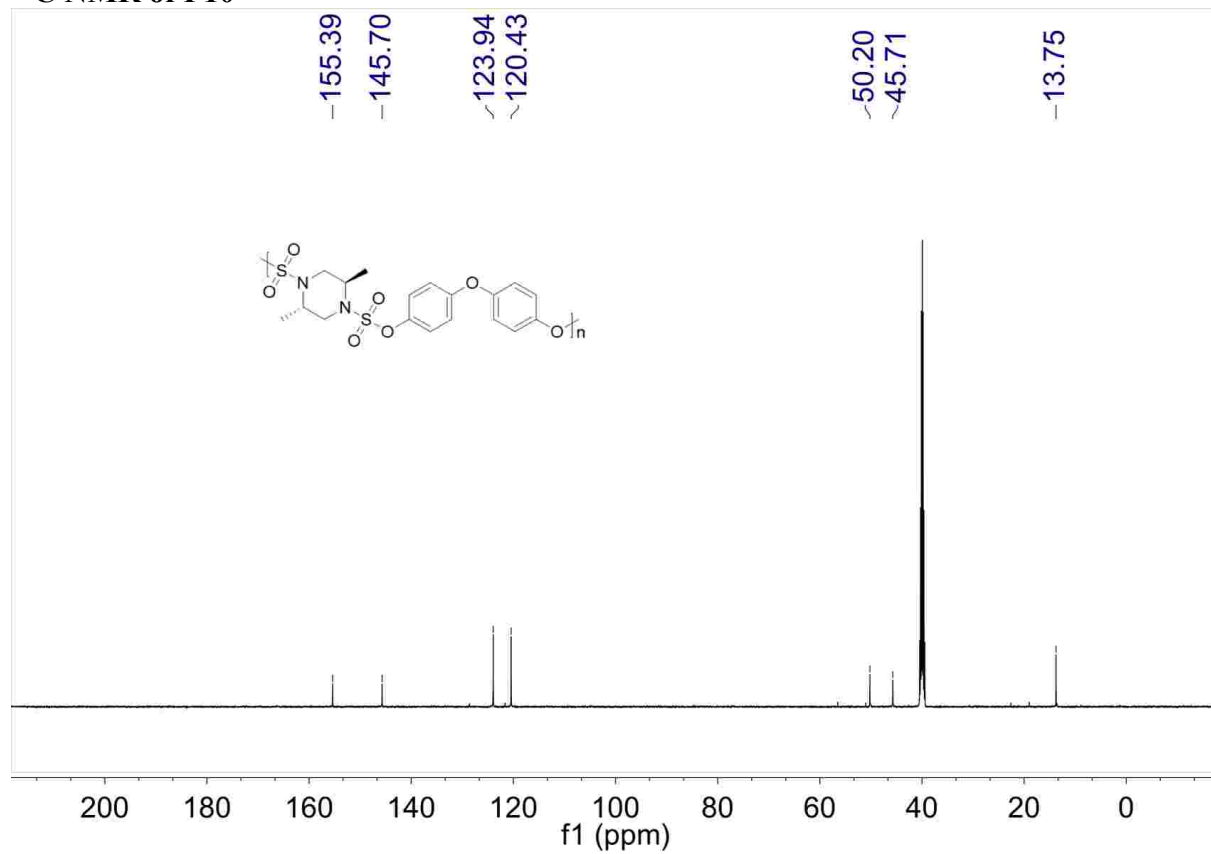

### <sup>1</sup>H NMR of P11

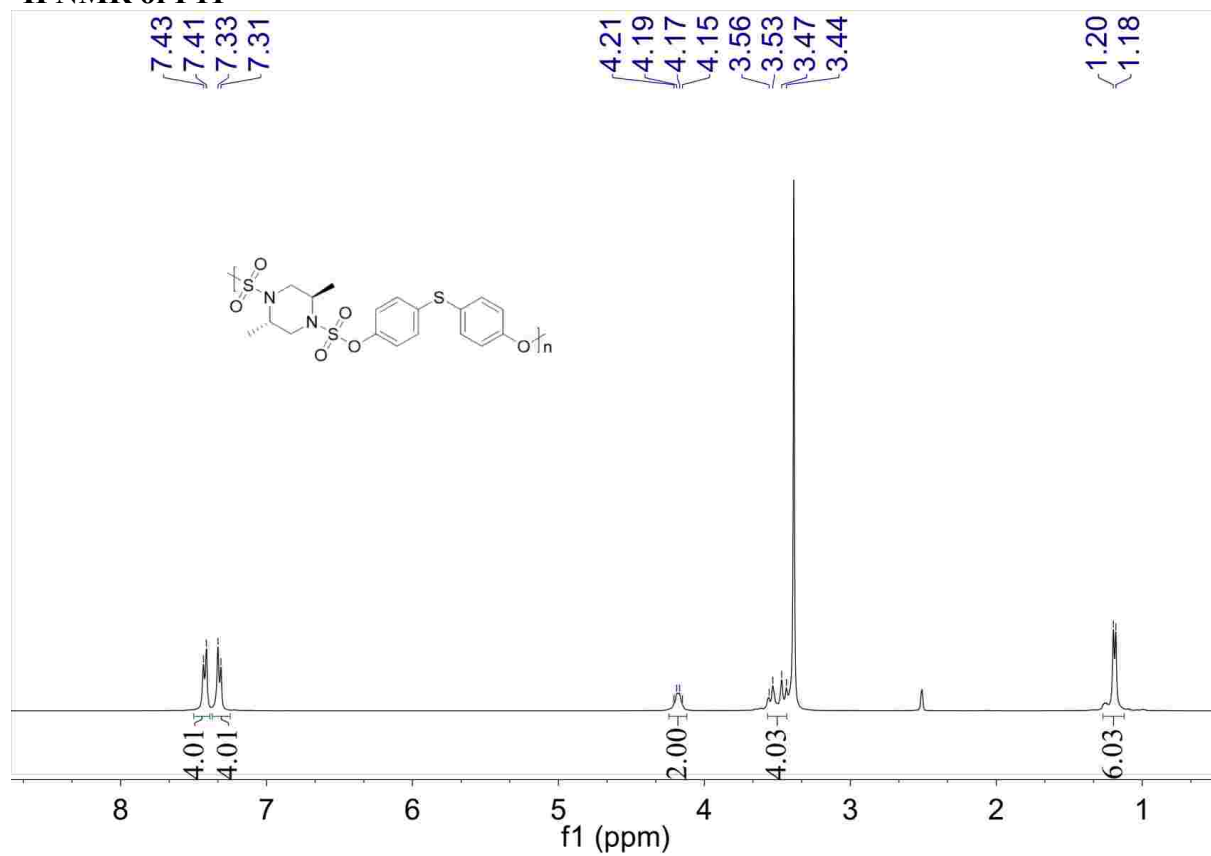

### <sup>13</sup>C NMR of P11

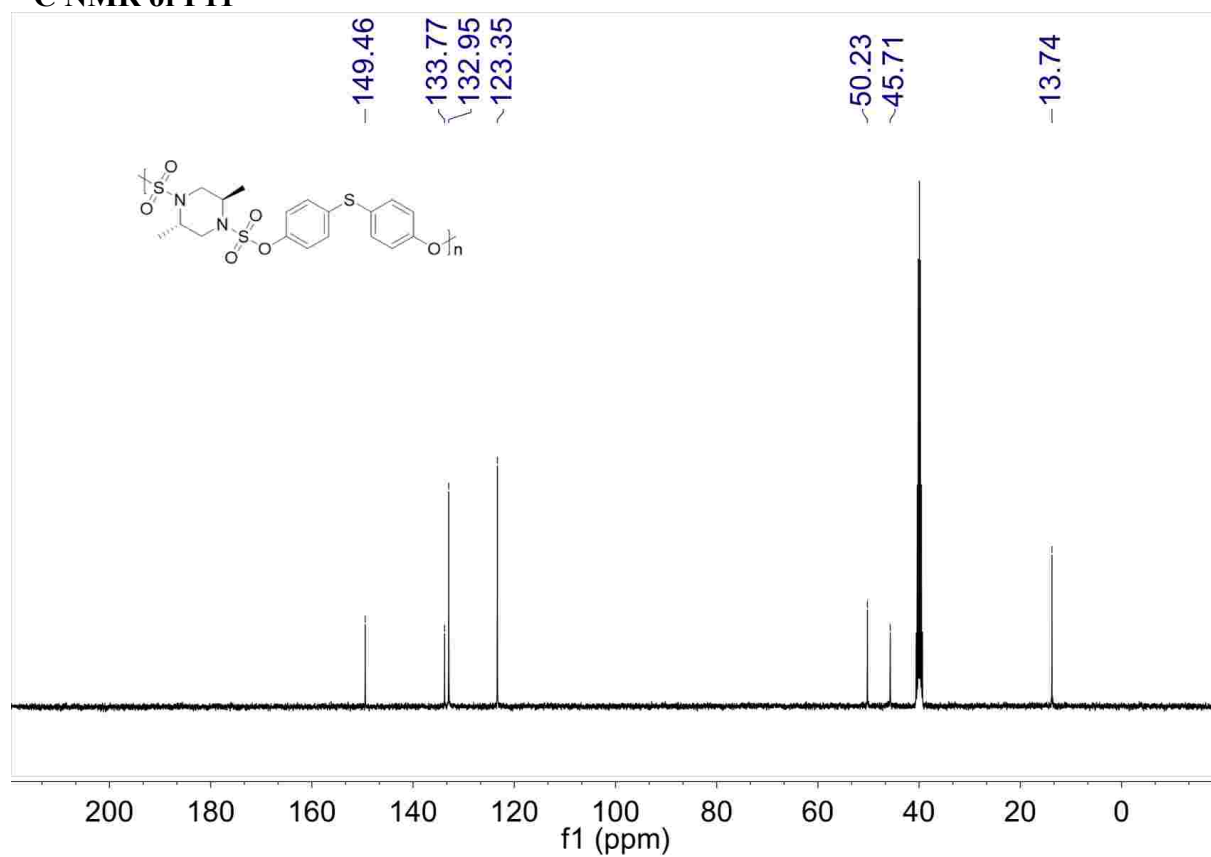

### <sup>1</sup>H NMR of P12

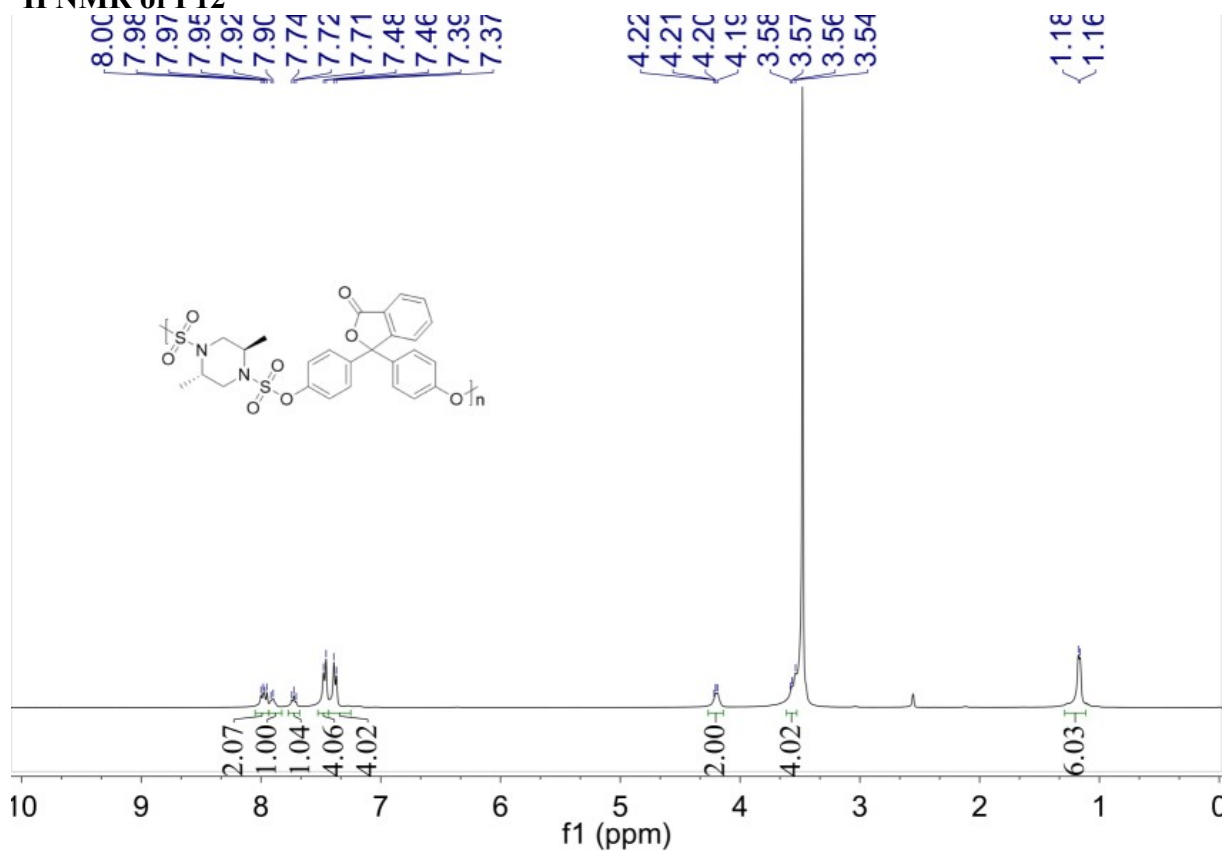

### <sup>13</sup>C NMR of P12

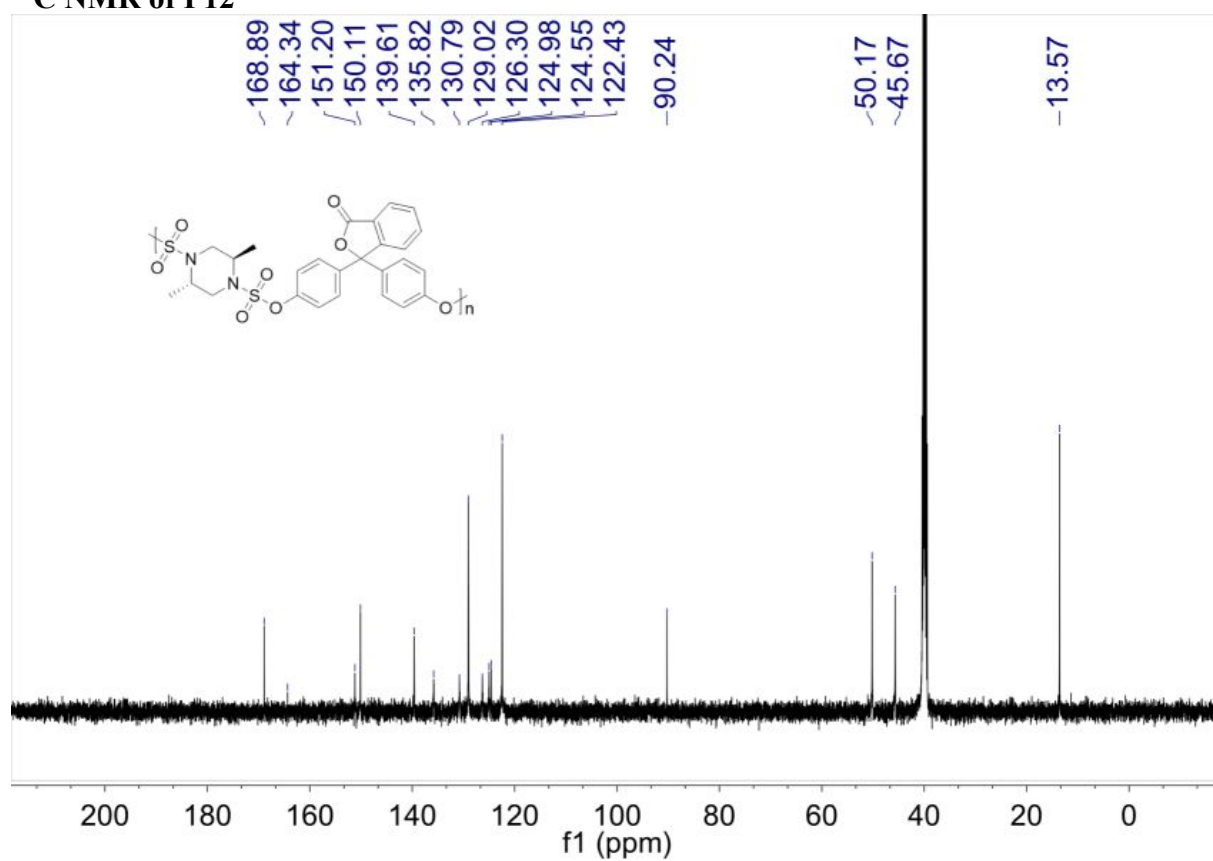

### <sup>1</sup>H NMR of P13

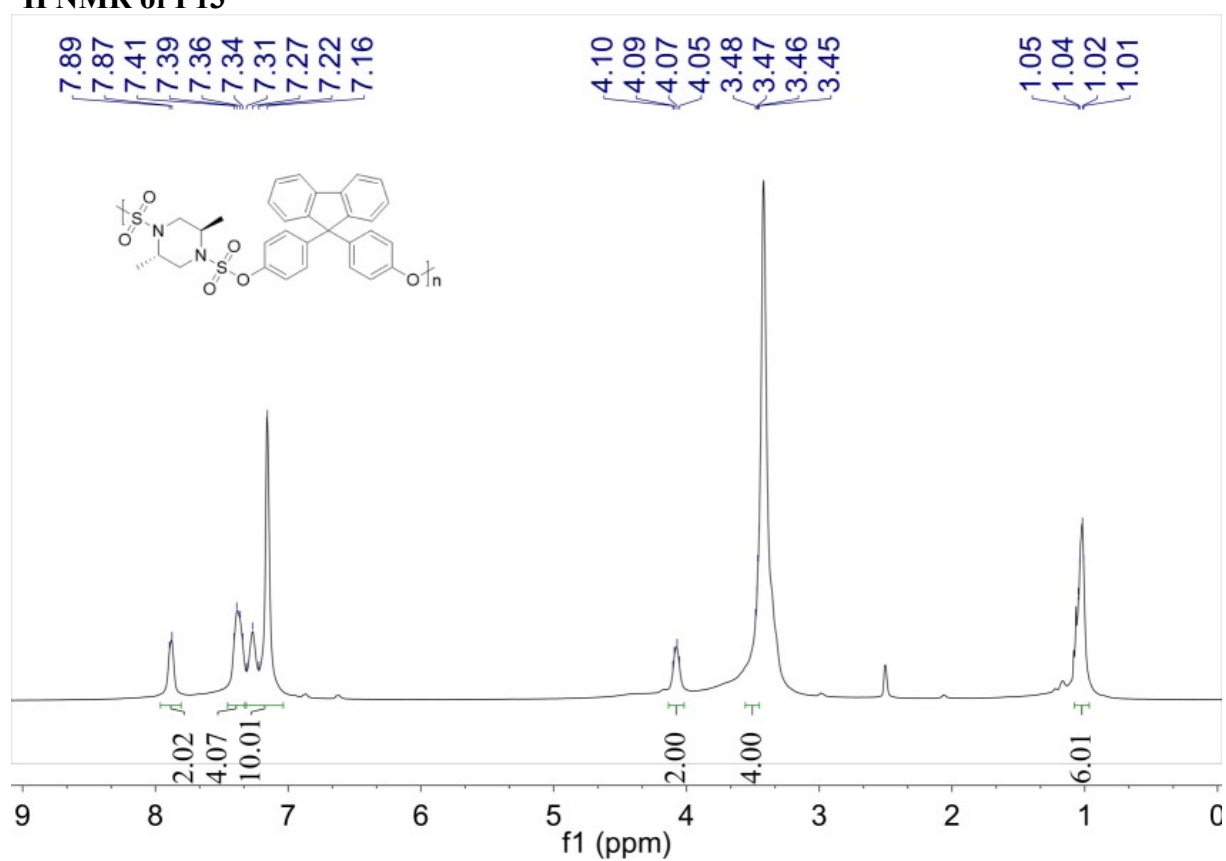

### <sup>13</sup>C NMR of P13

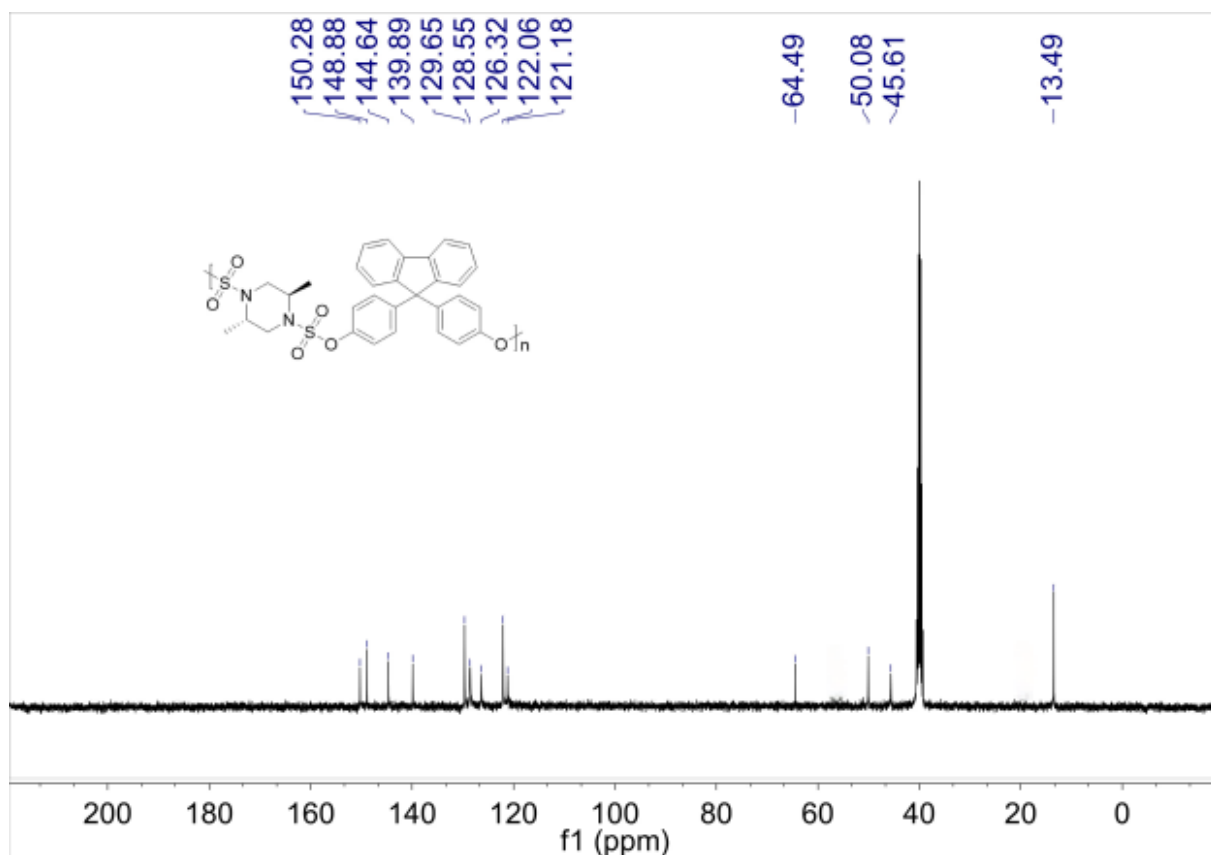

### <sup>1</sup>H NMR of P14

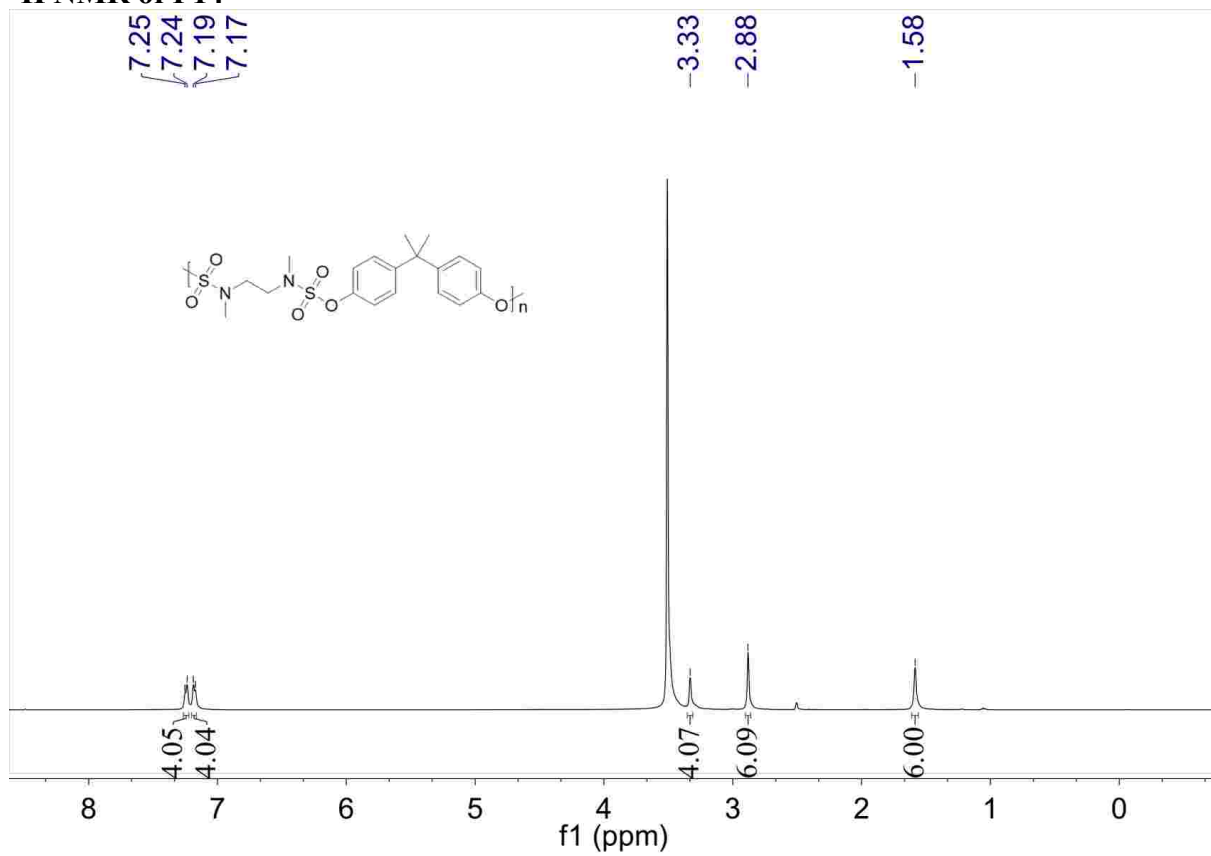

### <sup>13</sup>C NMR of P14

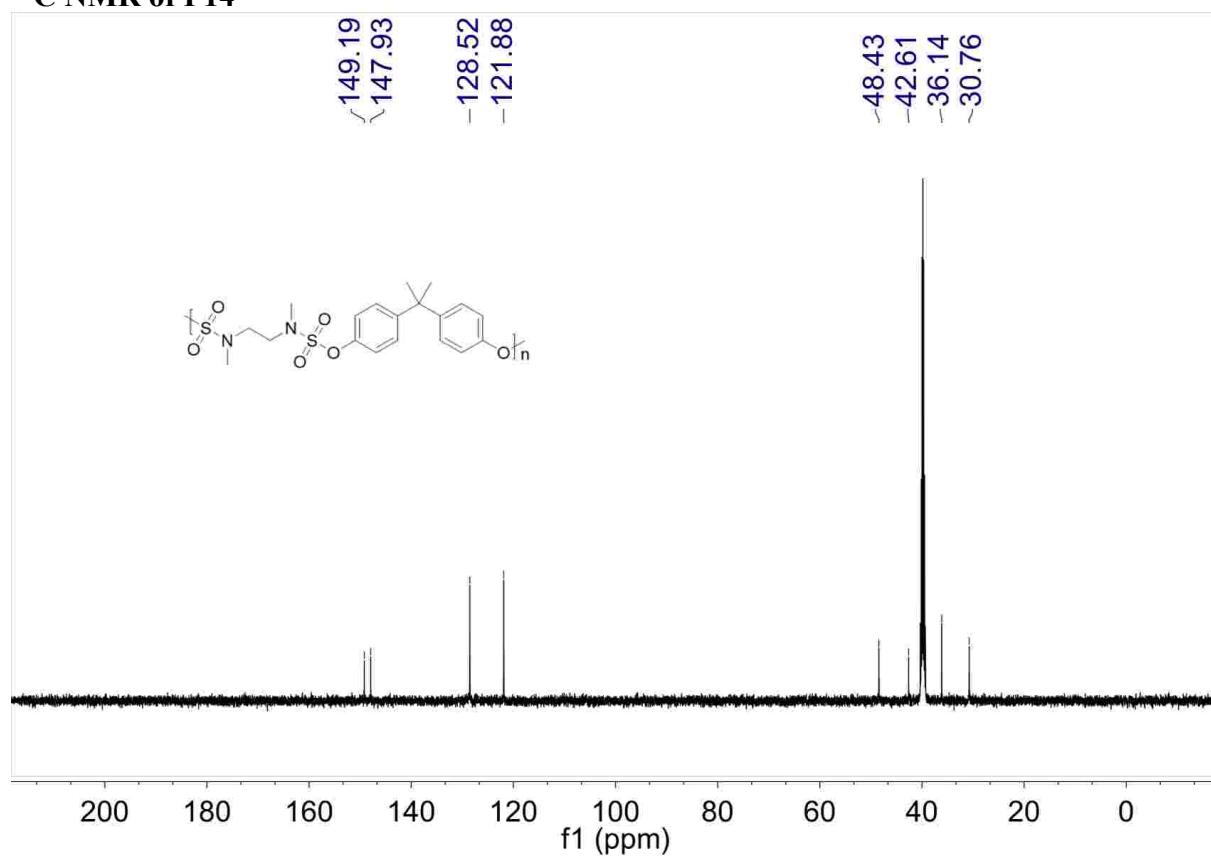

### <sup>1</sup>H NMR of P15

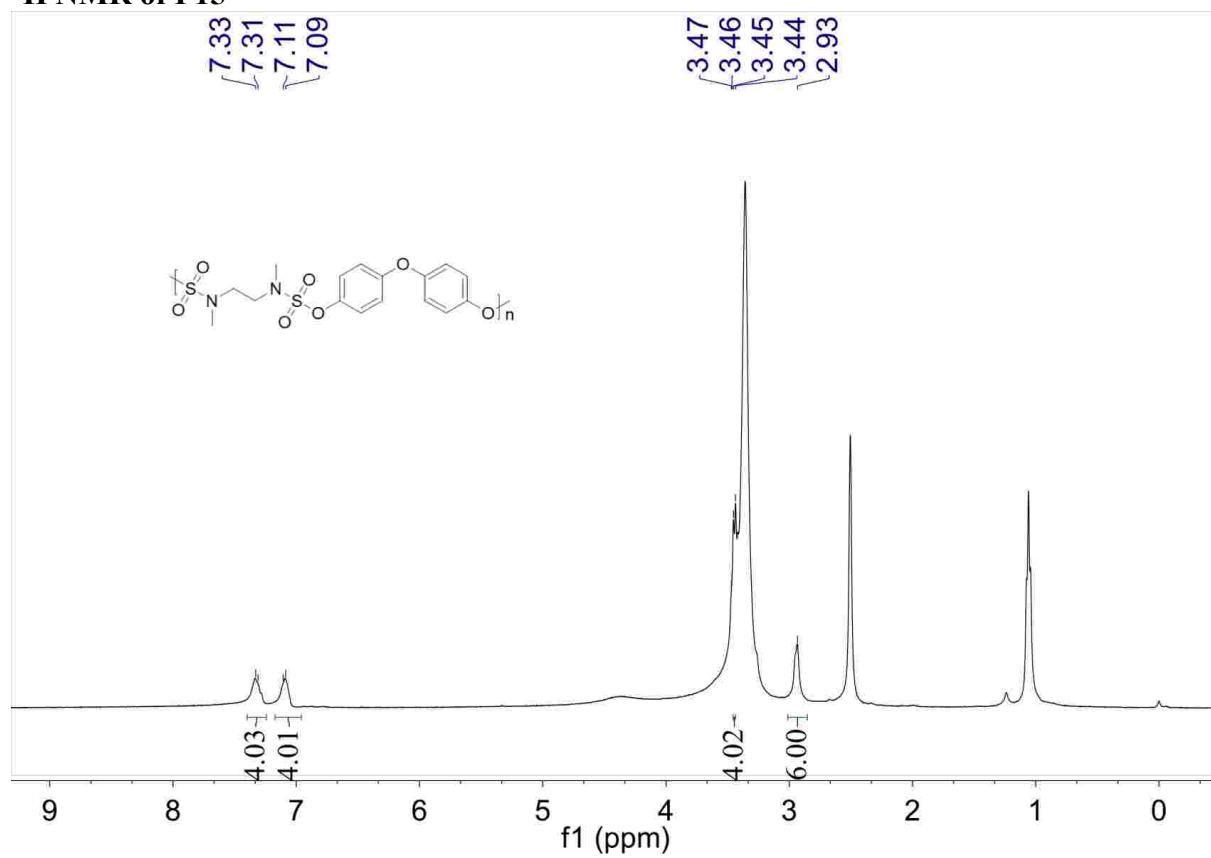

### <sup>13</sup>C NMR of P15

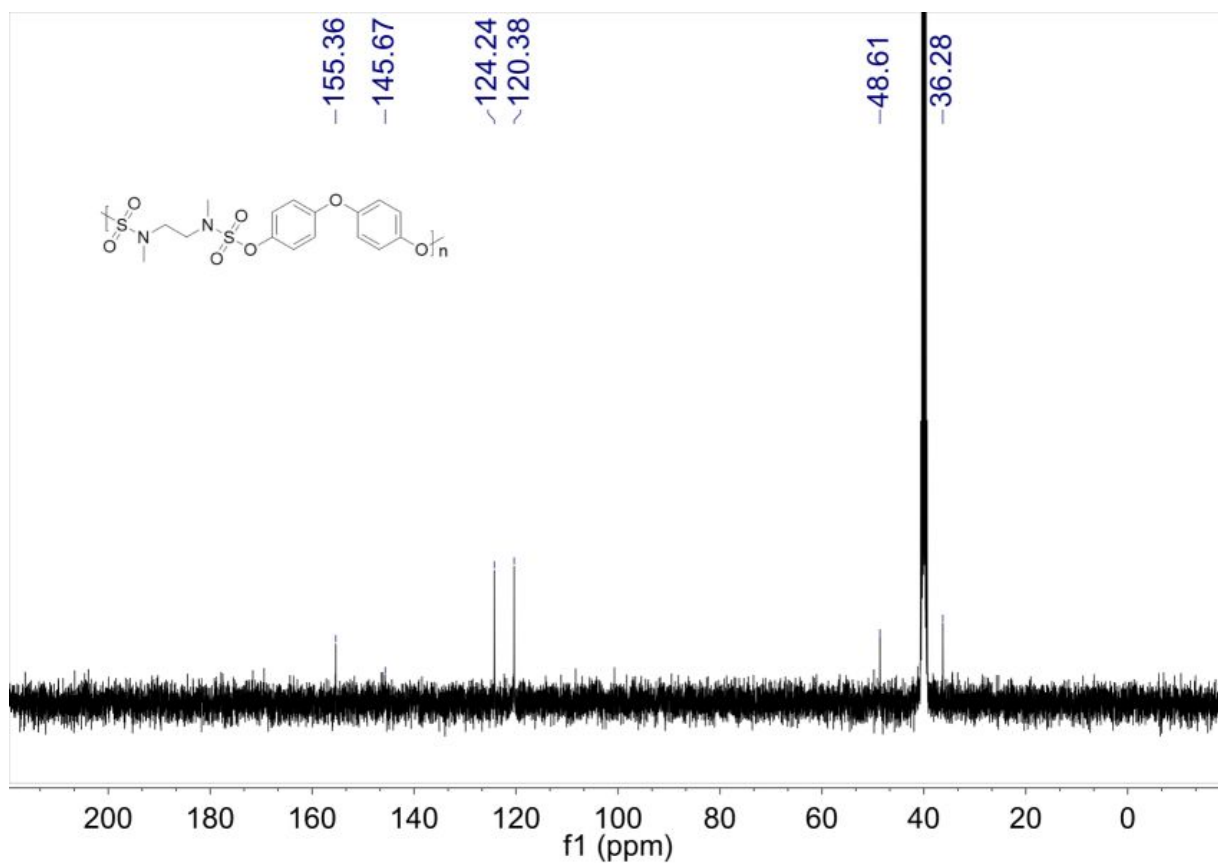

### <sup>1</sup>H NMR of P16

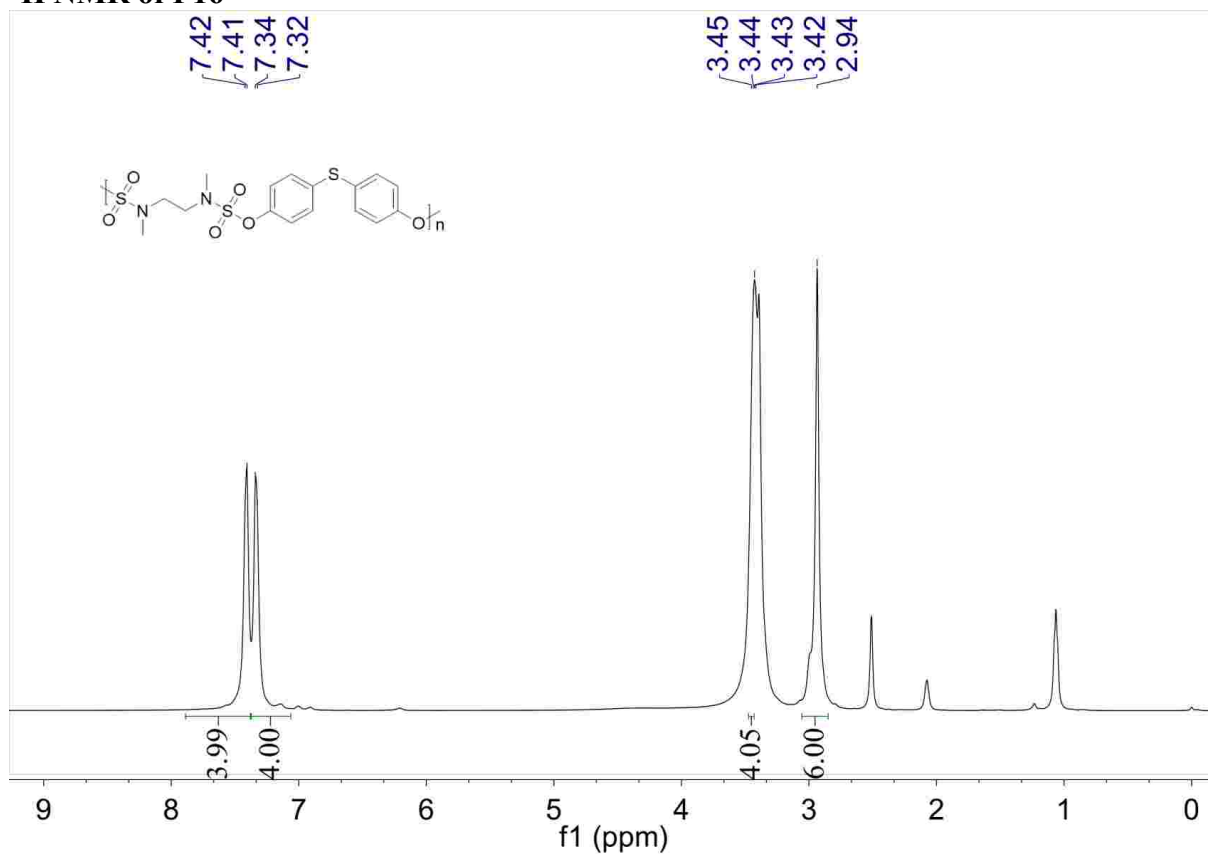

### <sup>13</sup>C NMR of P16

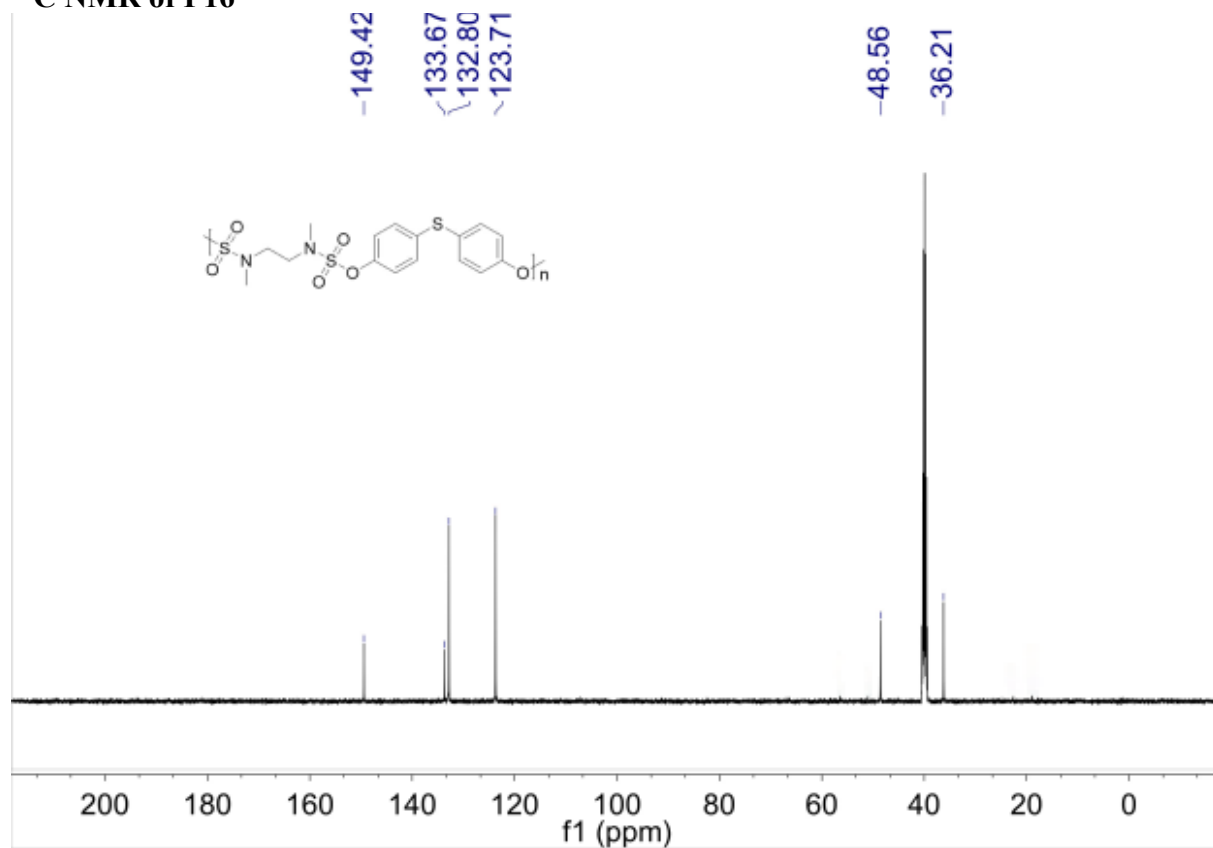

### <sup>1</sup>H NMR of P17

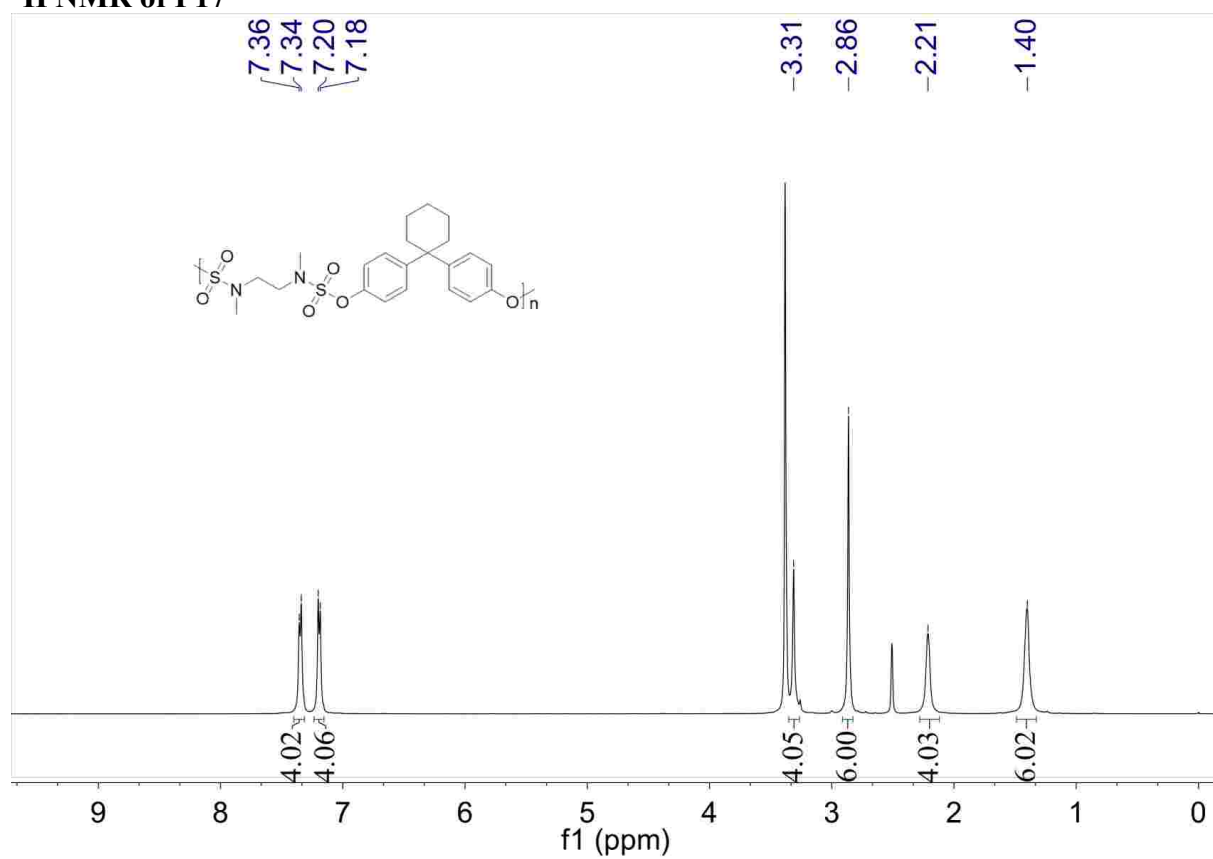

### <sup>13</sup>C NMR of P17

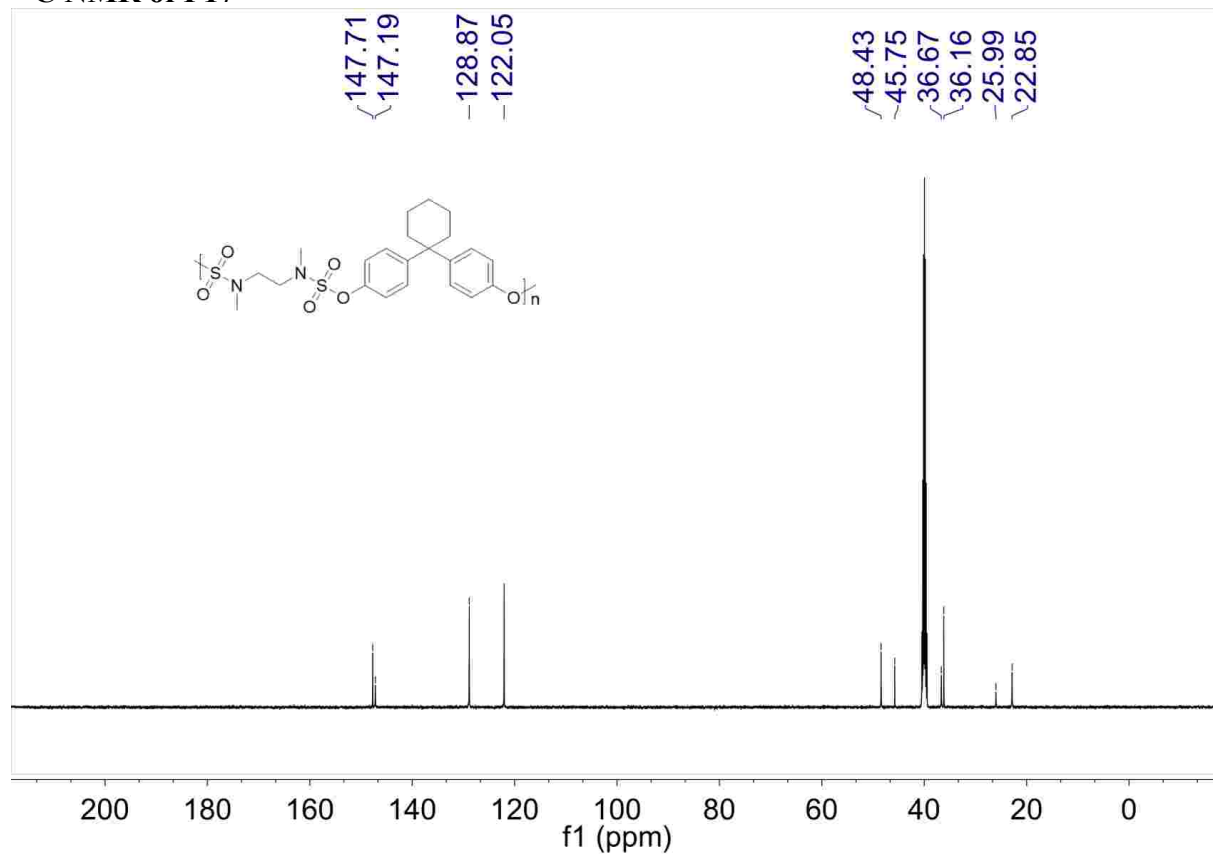

### <sup>1</sup>H NMR of P18

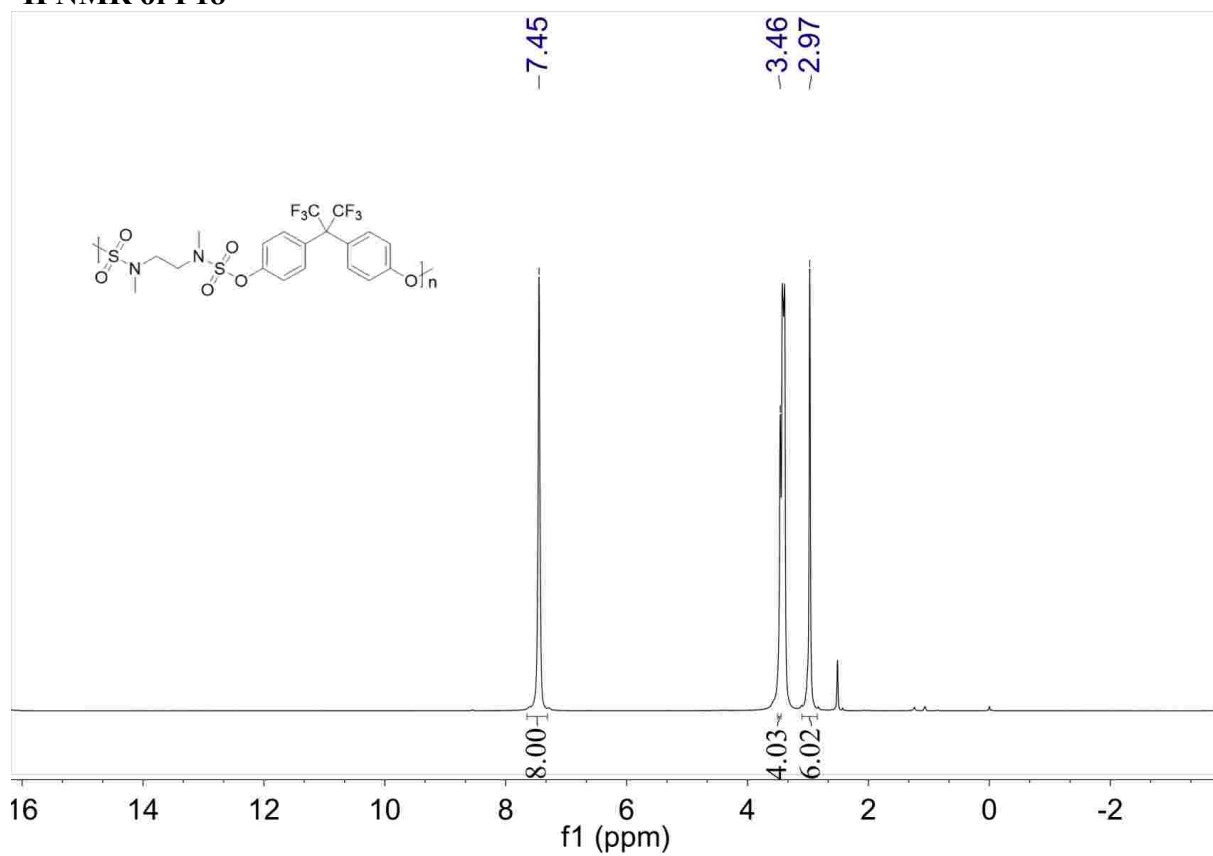



### <sup>13</sup>C NMR of P18

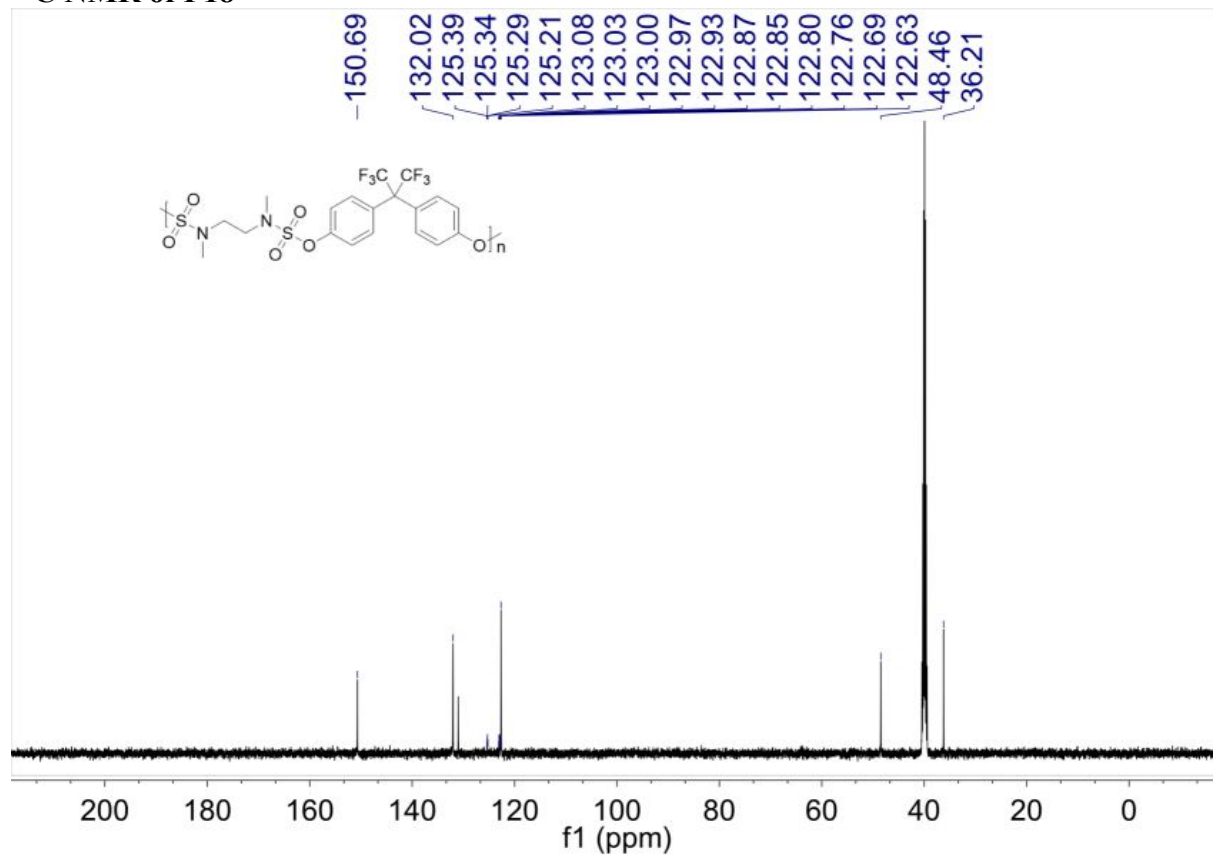

### <sup>1</sup>H NMR of P19

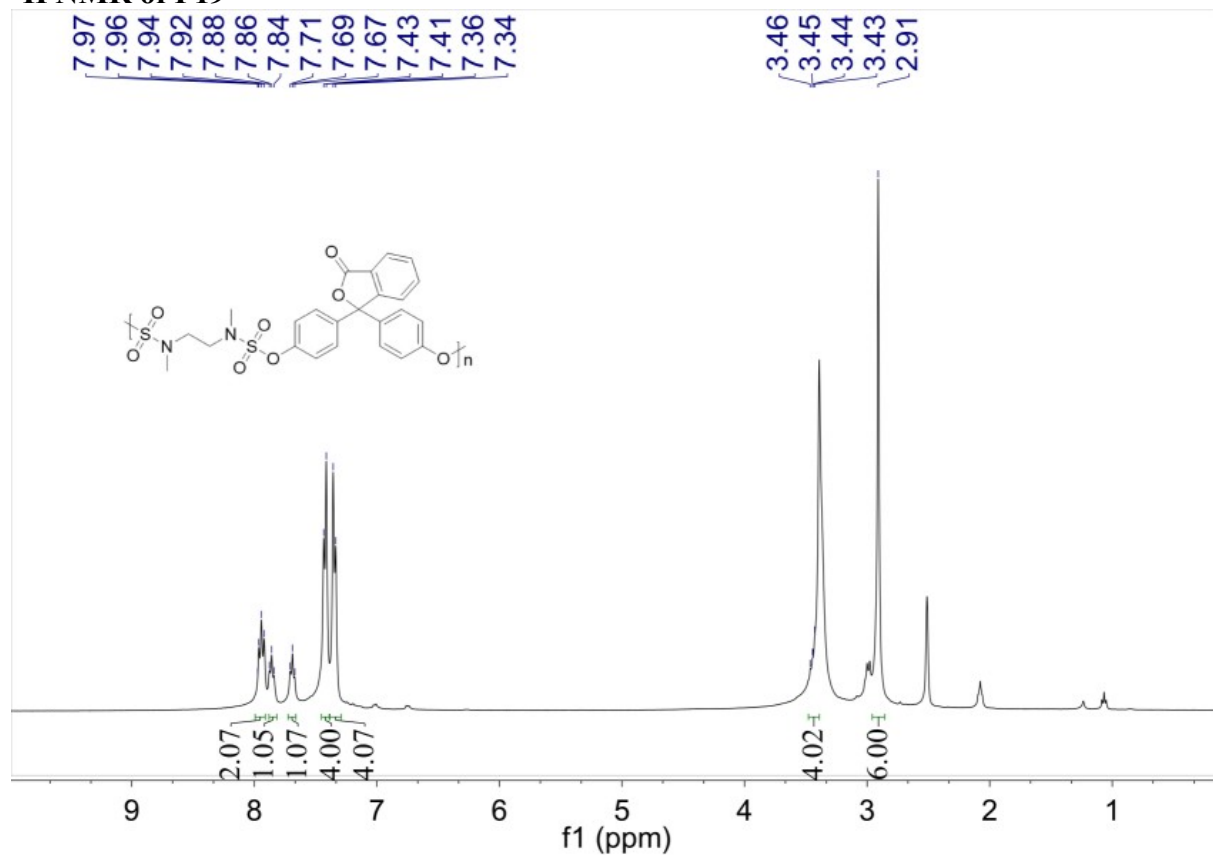

### <sup>13</sup>C NMR of P19

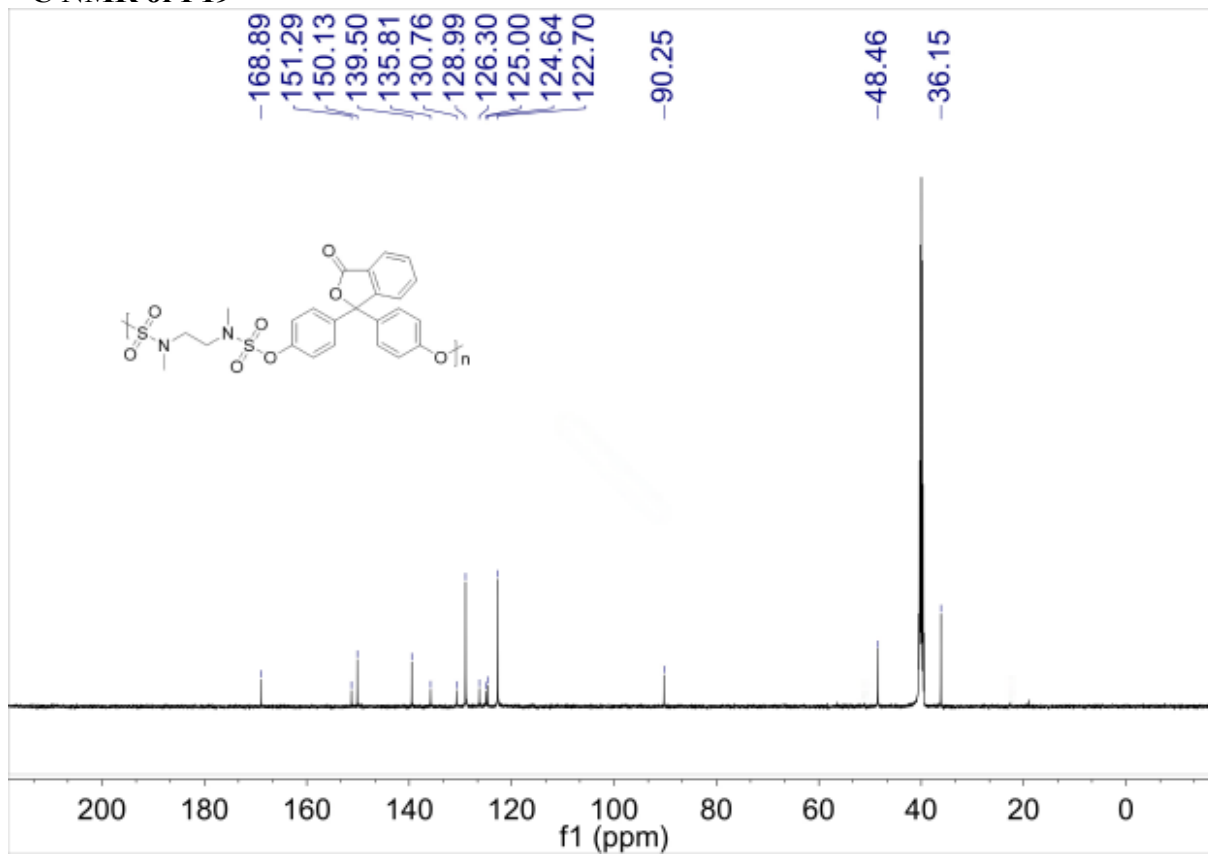

### <sup>1</sup>H NMR of P20

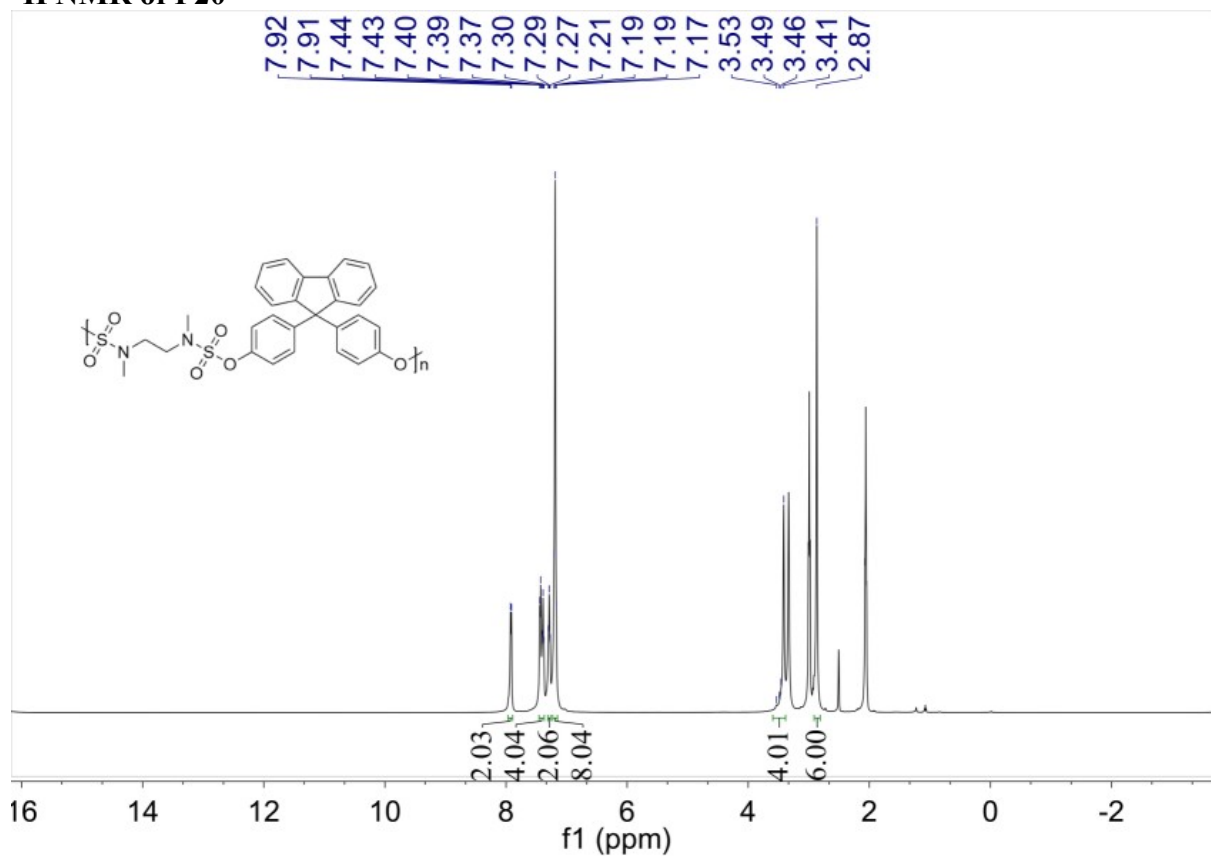

### <sup>13</sup>C NMR of P20

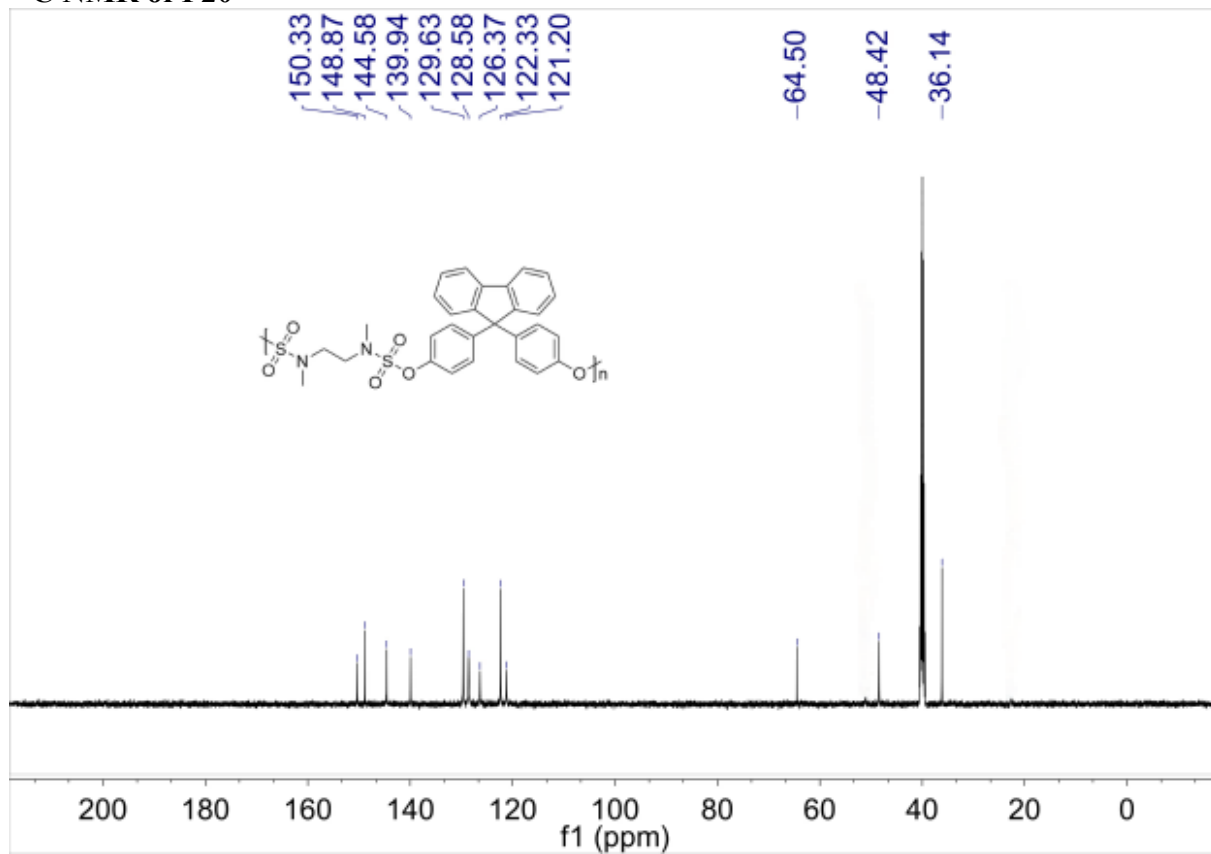

### <sup>1</sup>H NMR of P21

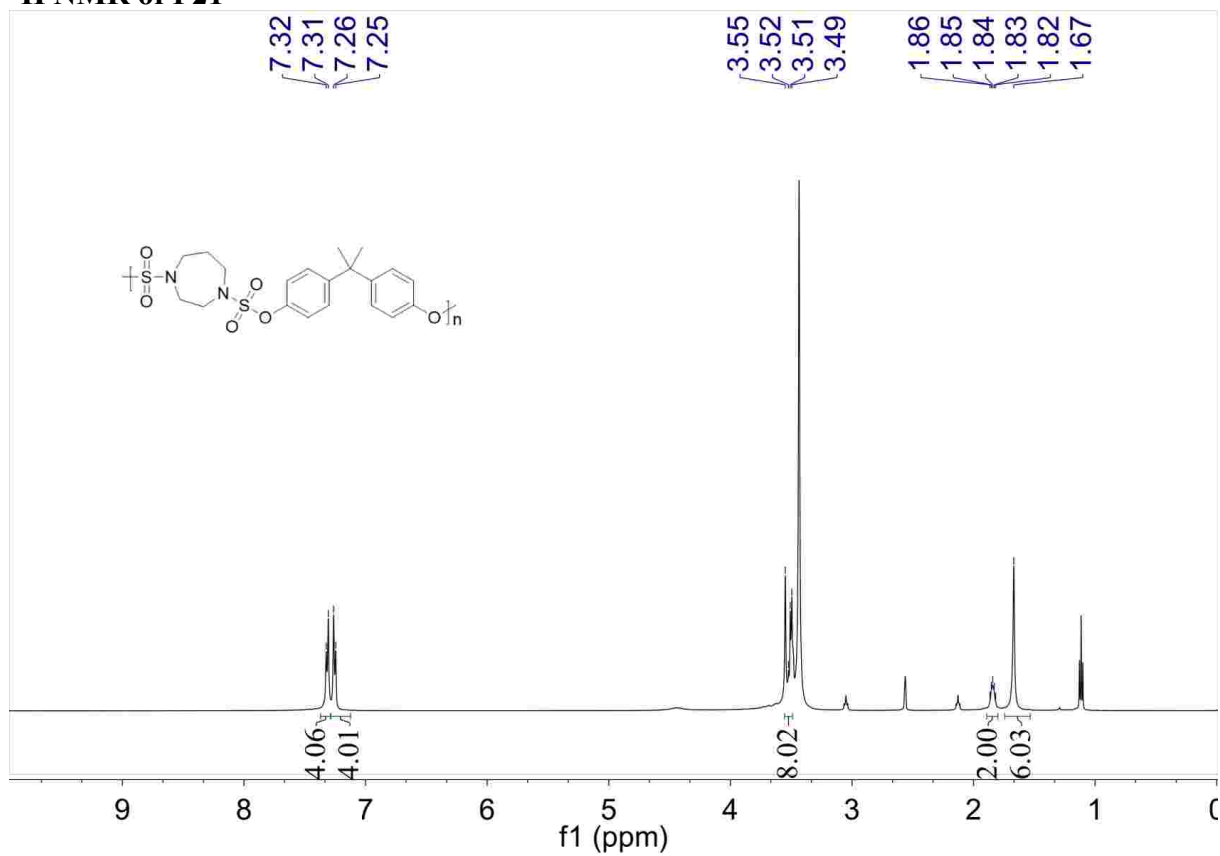

### <sup>13</sup>C NMR of P21

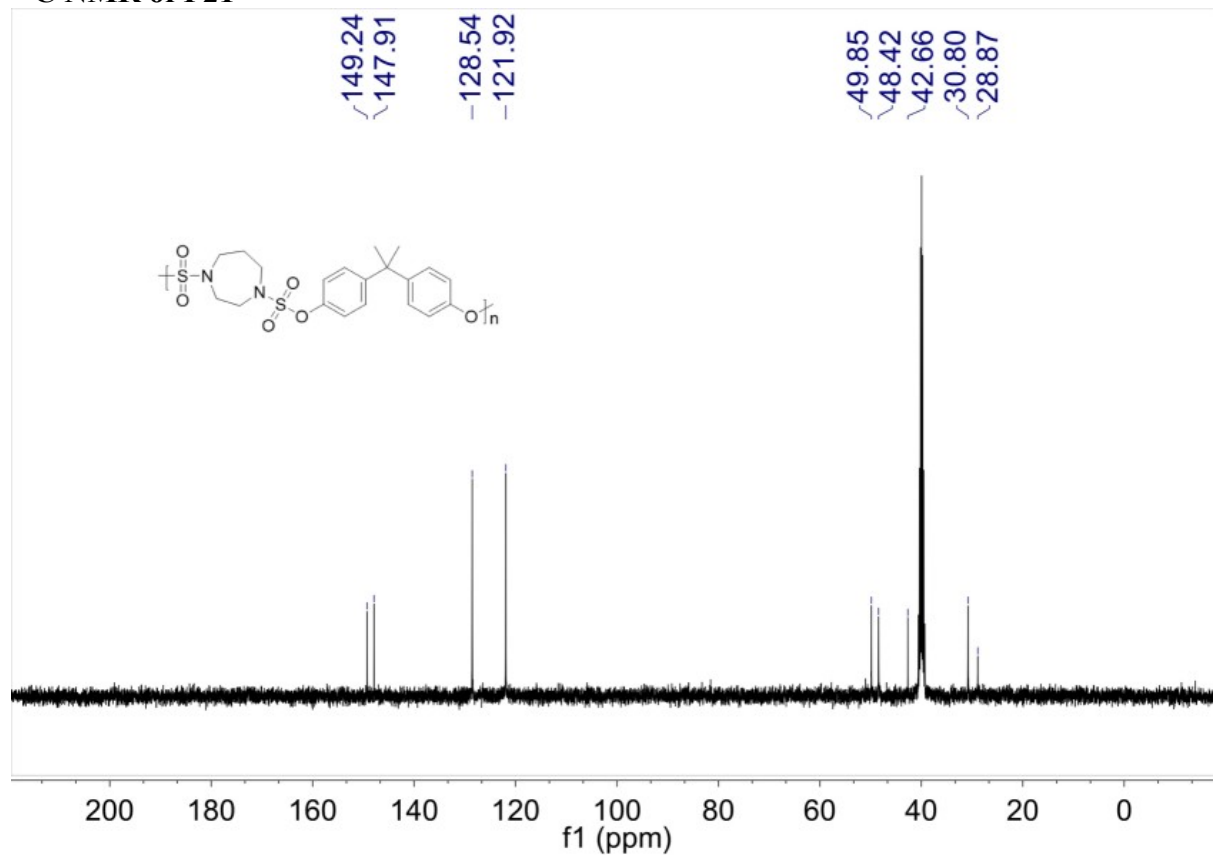

### <sup>1</sup>H NMR of P22

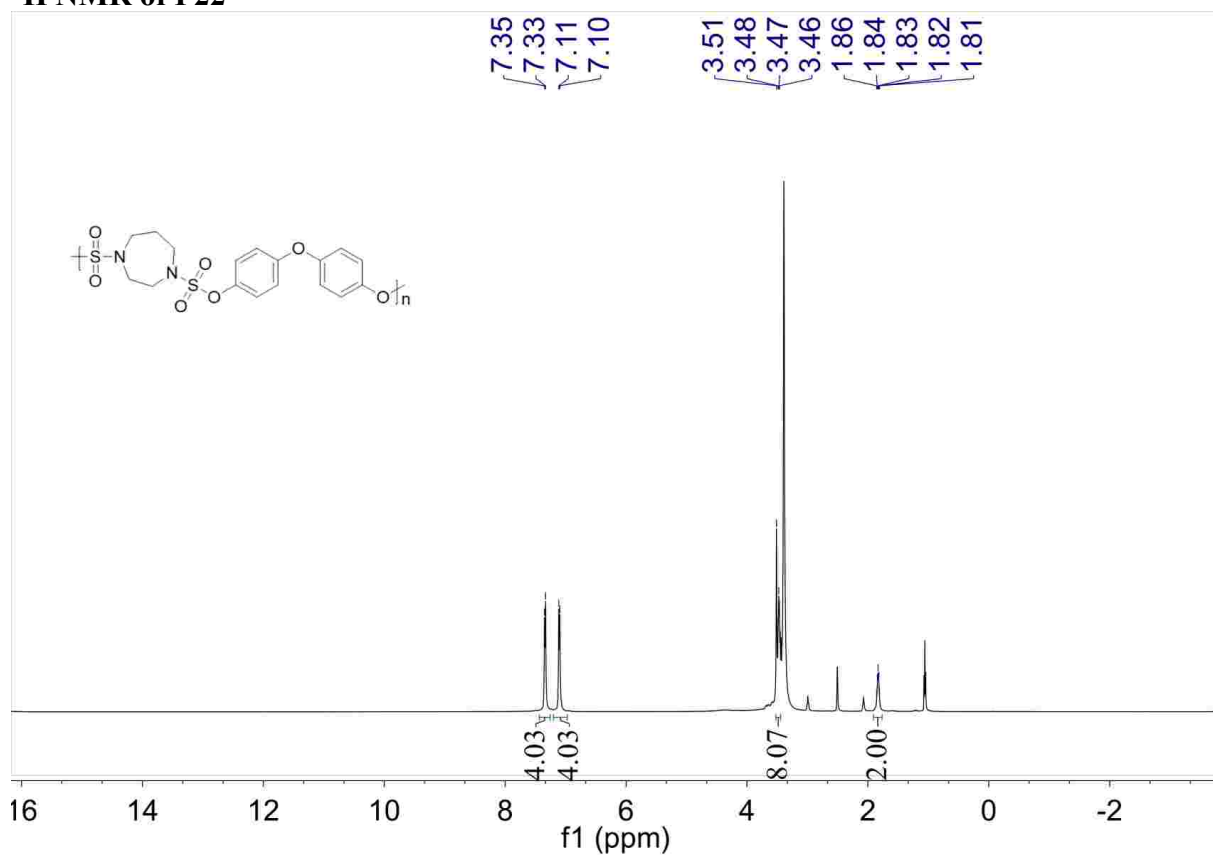

### <sup>13</sup>C NMR of P22

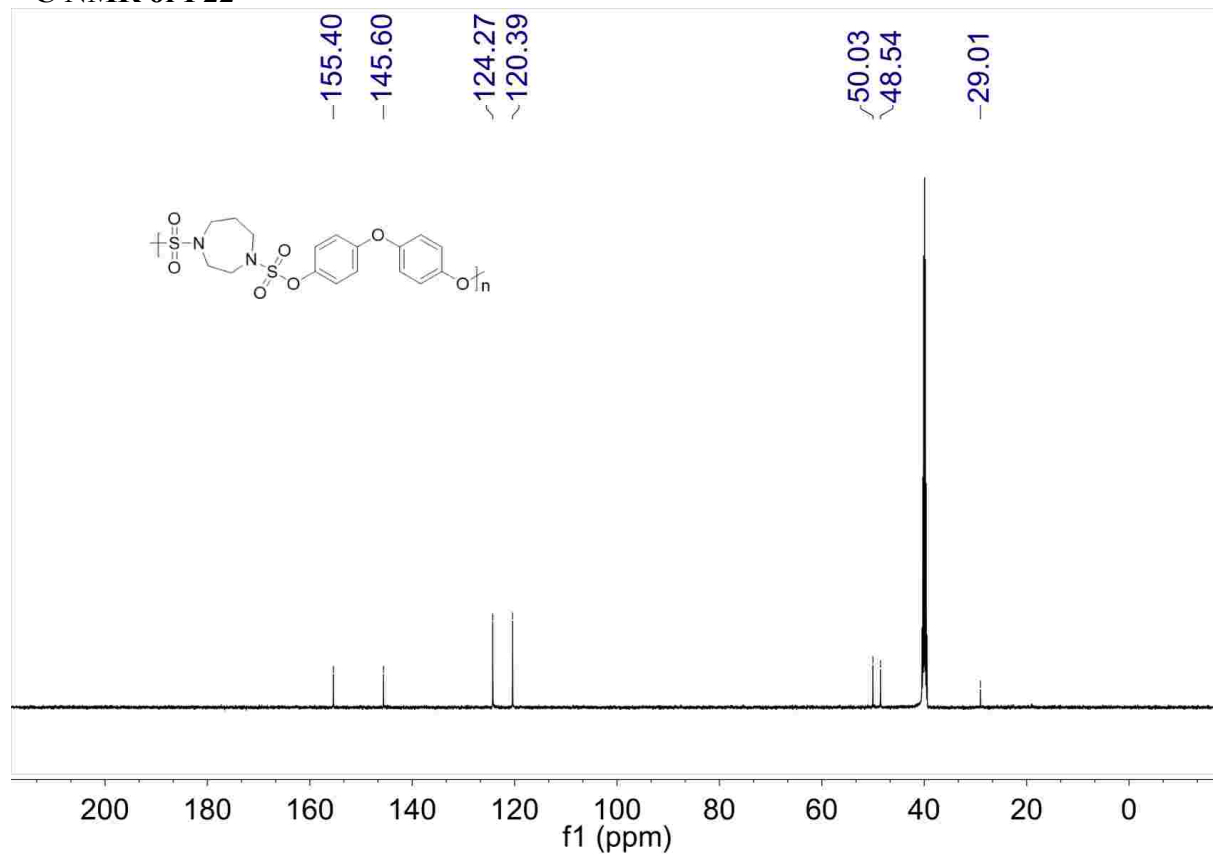

### <sup>1</sup>H NMR of P23

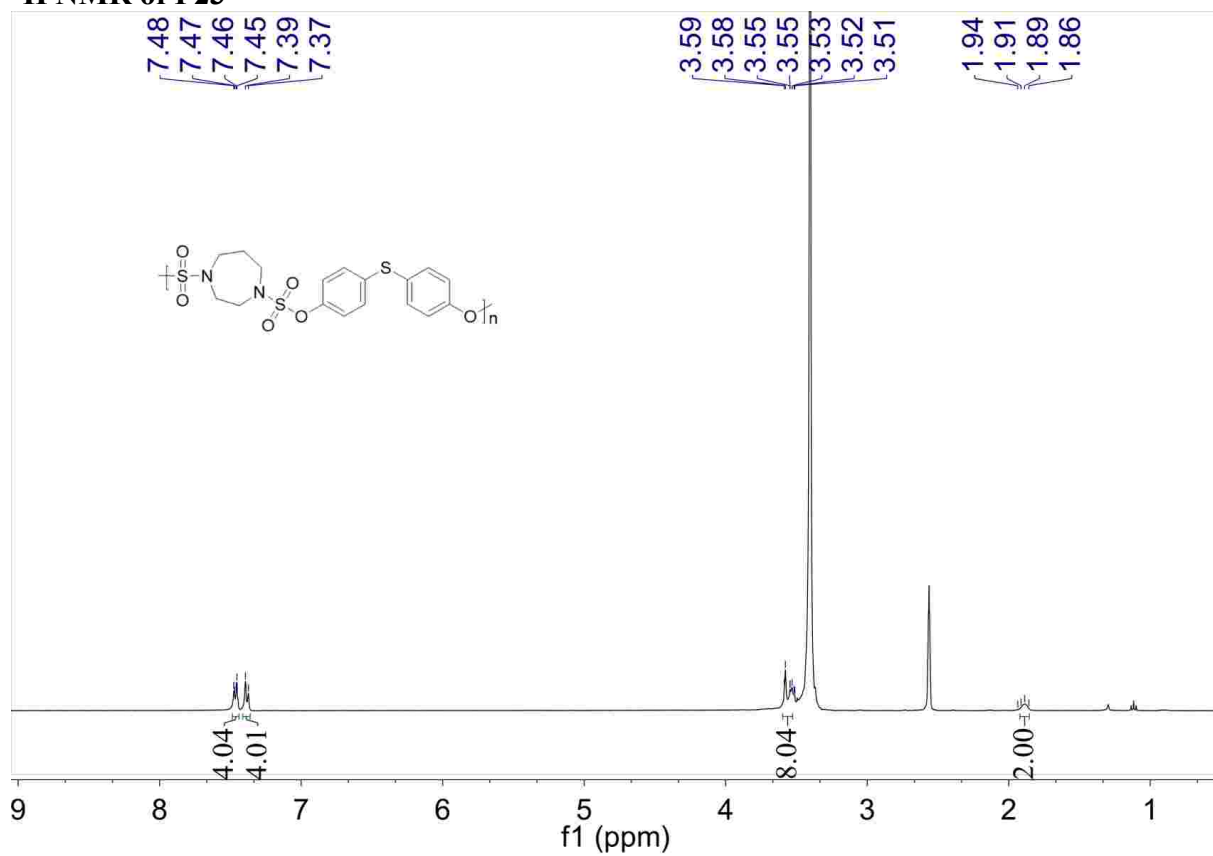

### <sup>13</sup>C NMR of P23

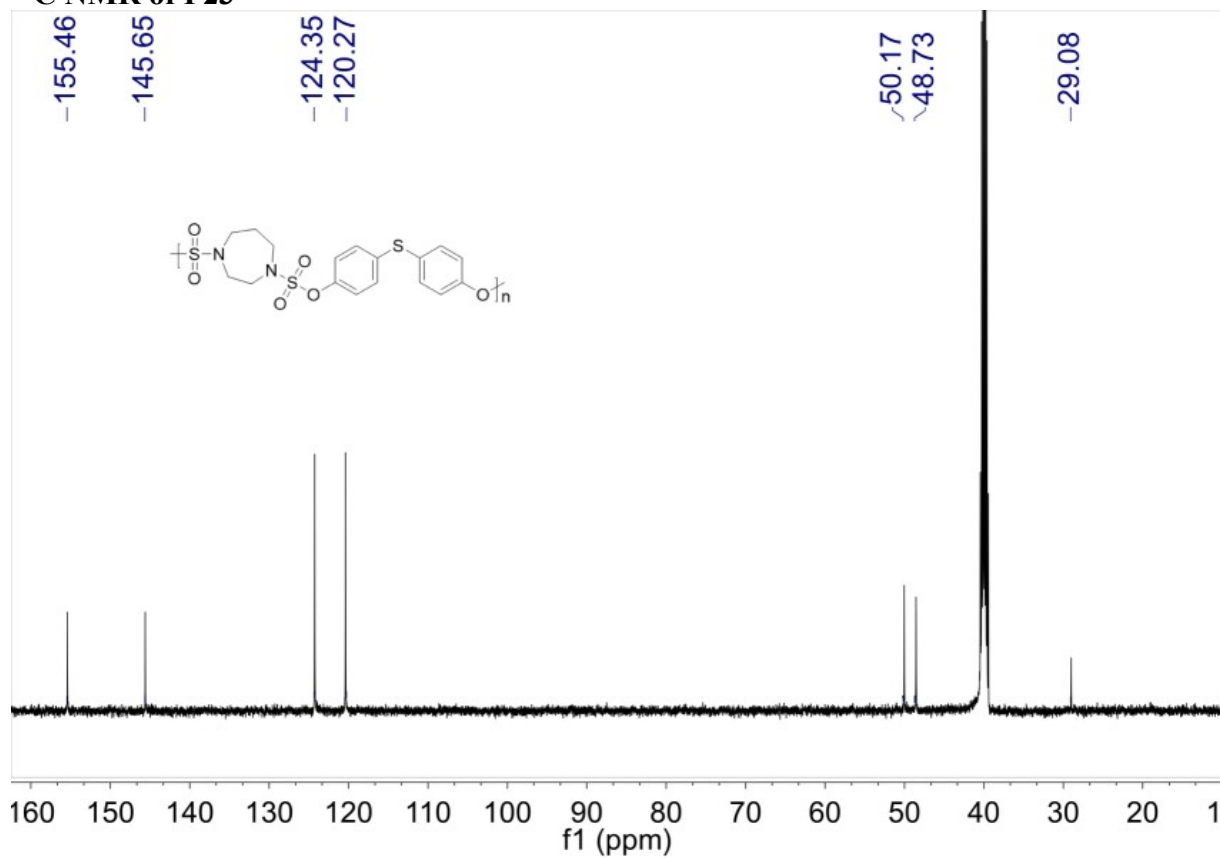

### <sup>1</sup>H NMR of P24

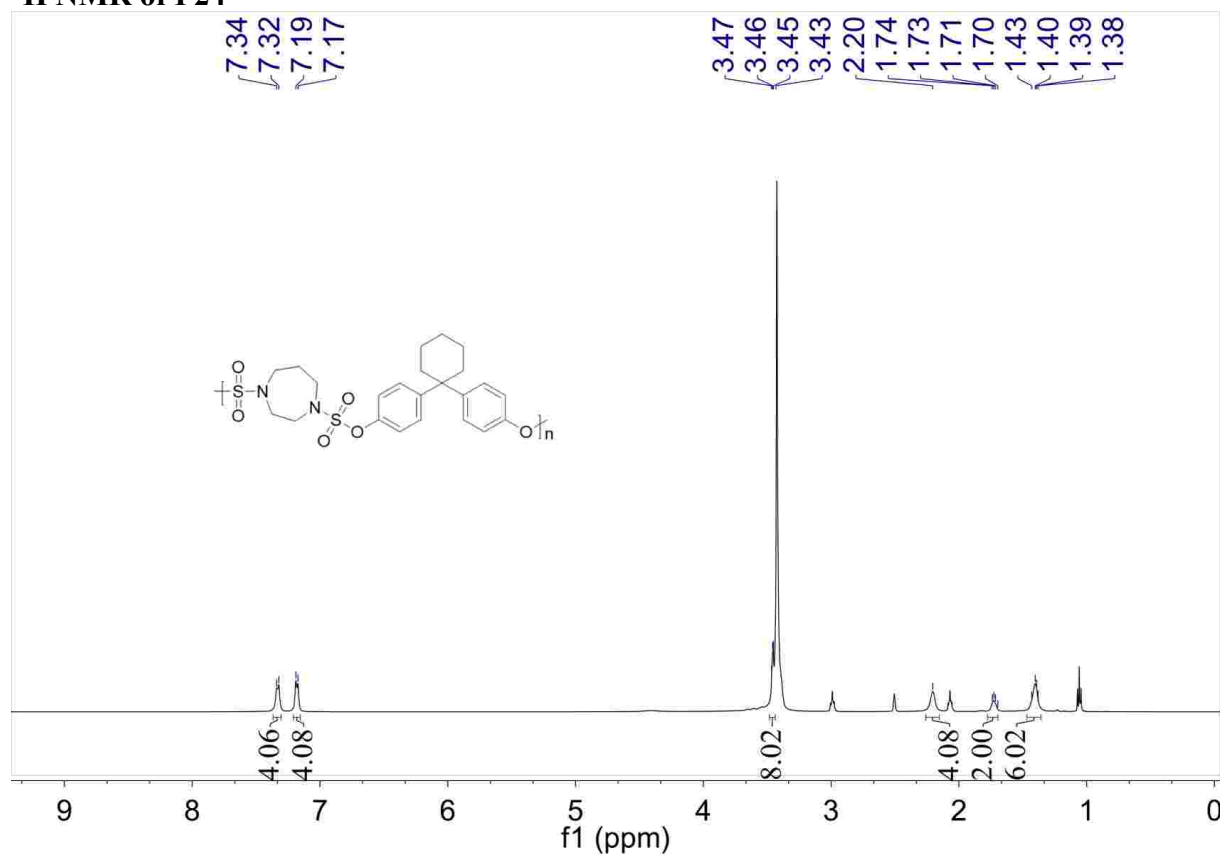

### <sup>13</sup>C NMR of P24

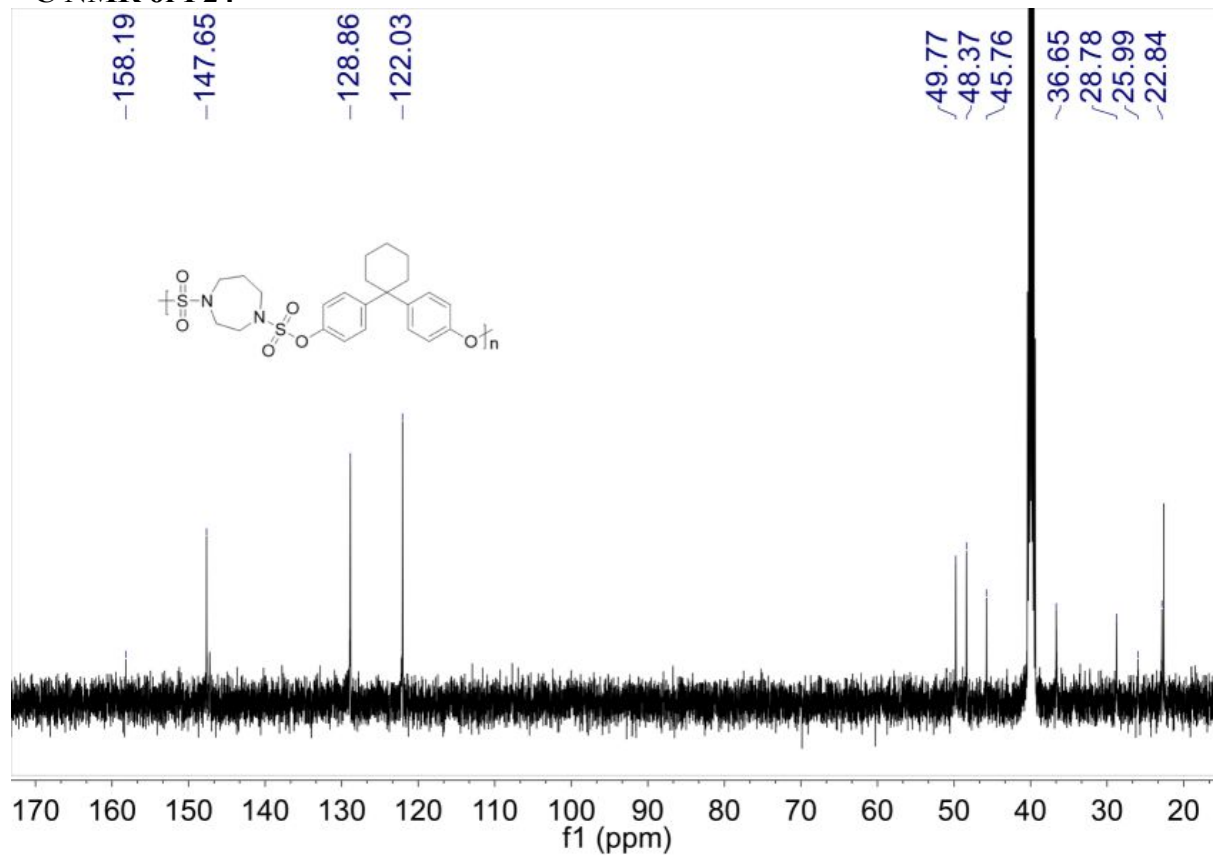

### <sup>1</sup>H NMR of P25

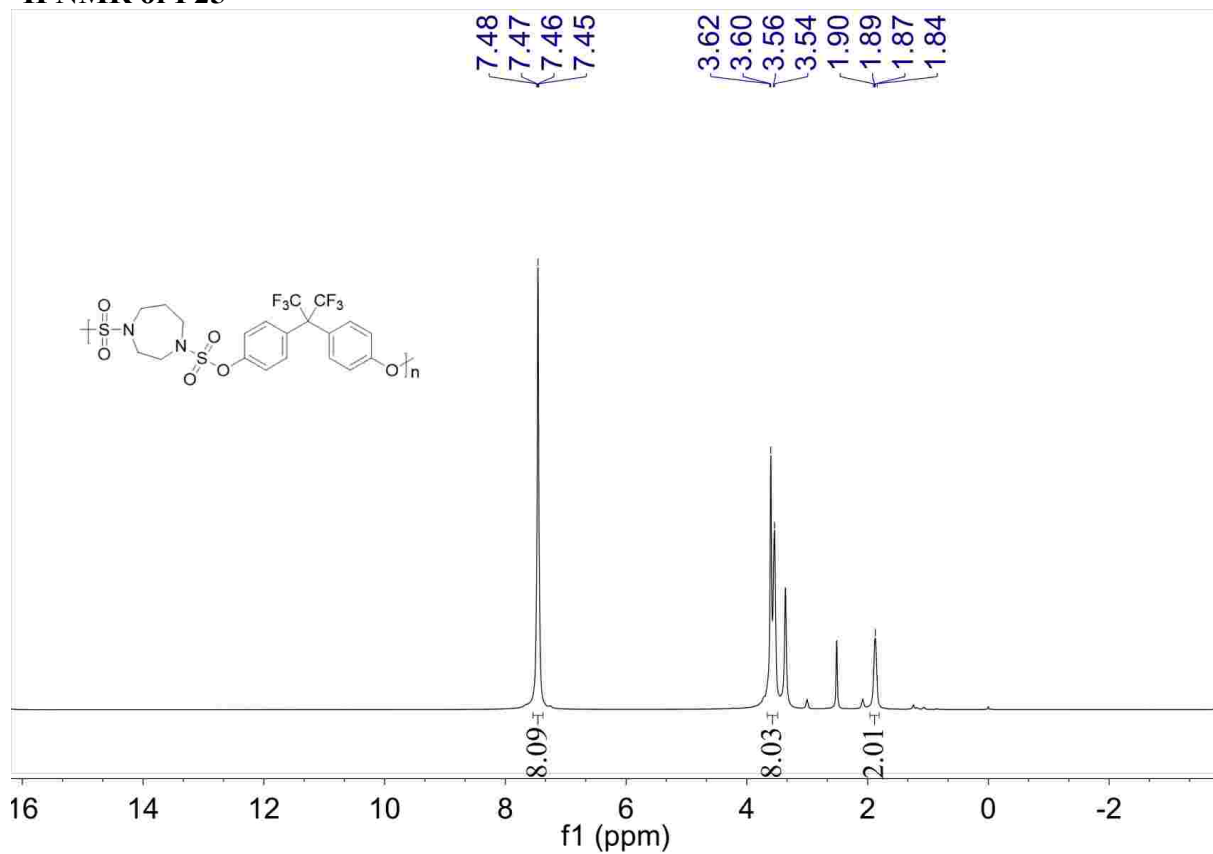

### <sup>13</sup>C NMR of P25

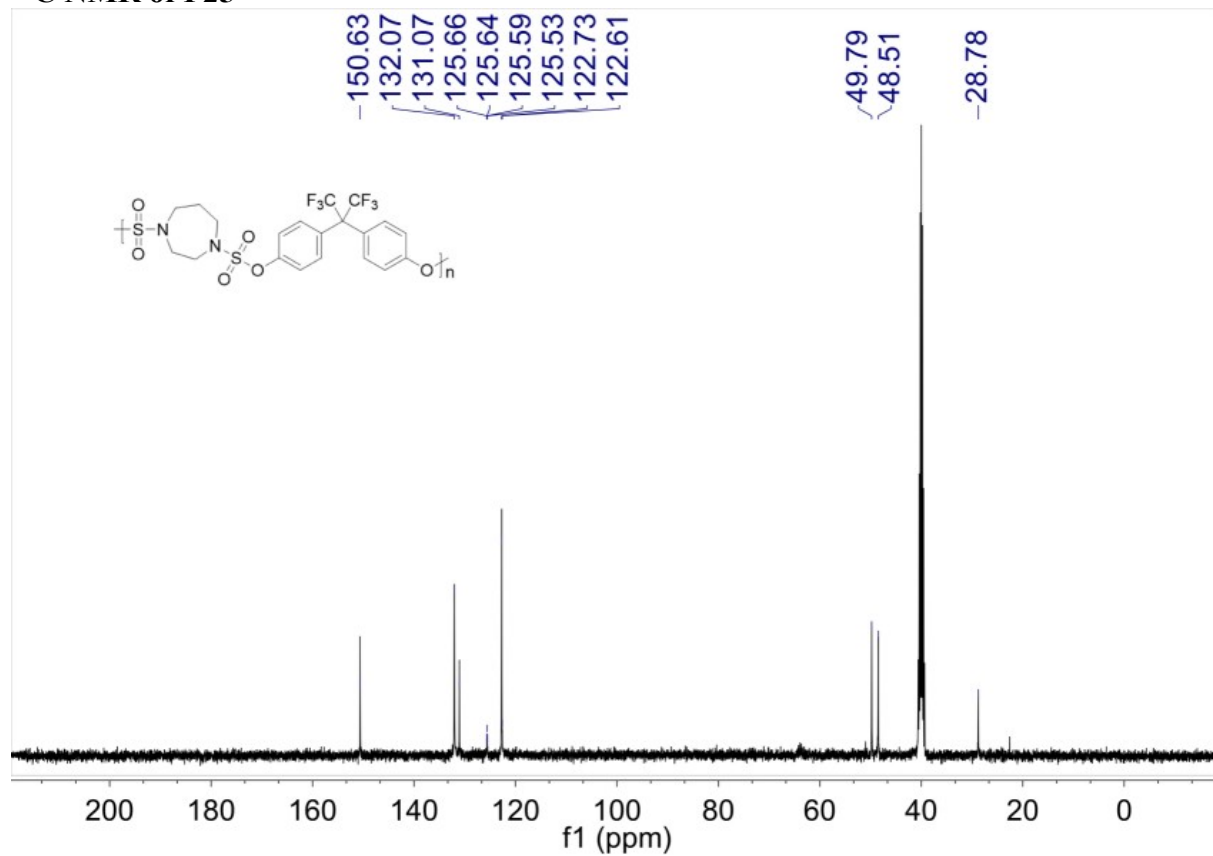

### <sup>1</sup>H NMR of P26

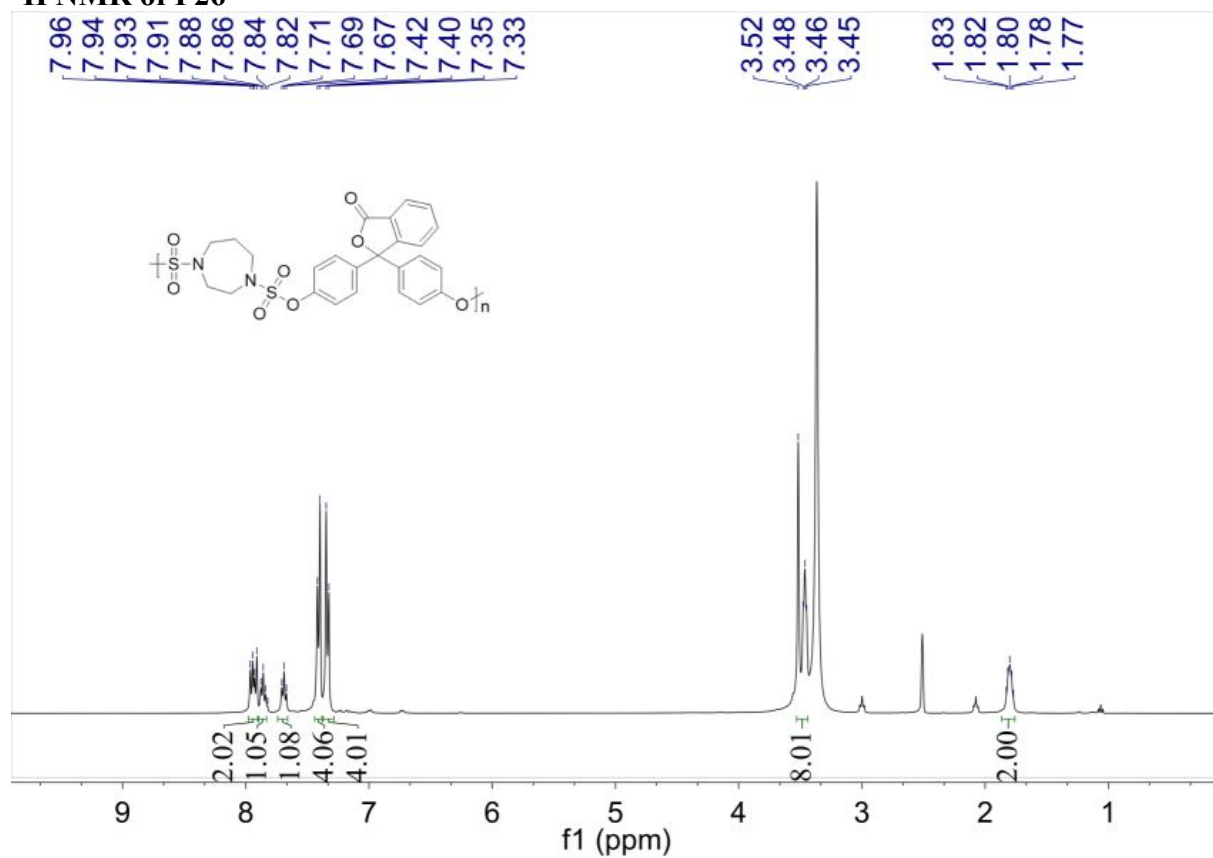



### <sup>13</sup>C NMR of P26

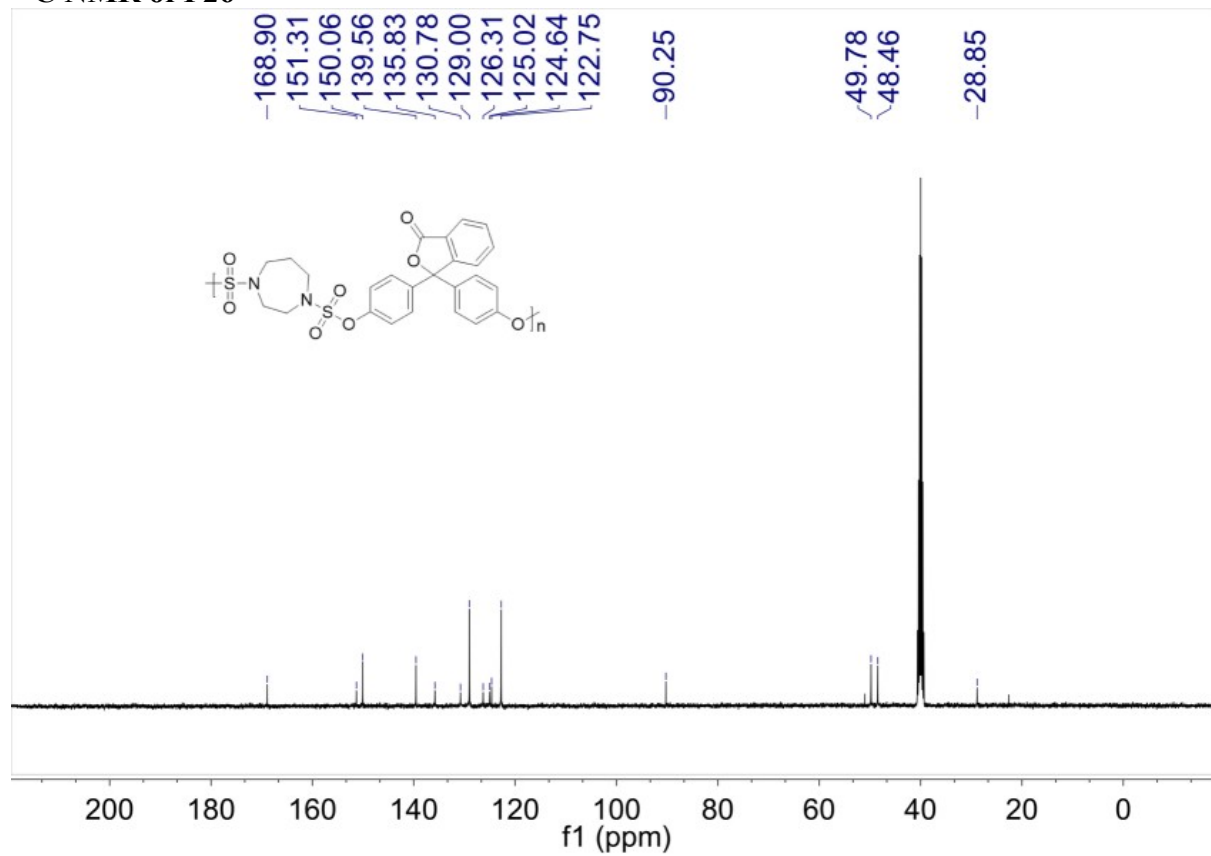

### <sup>1</sup>H NMR of P27

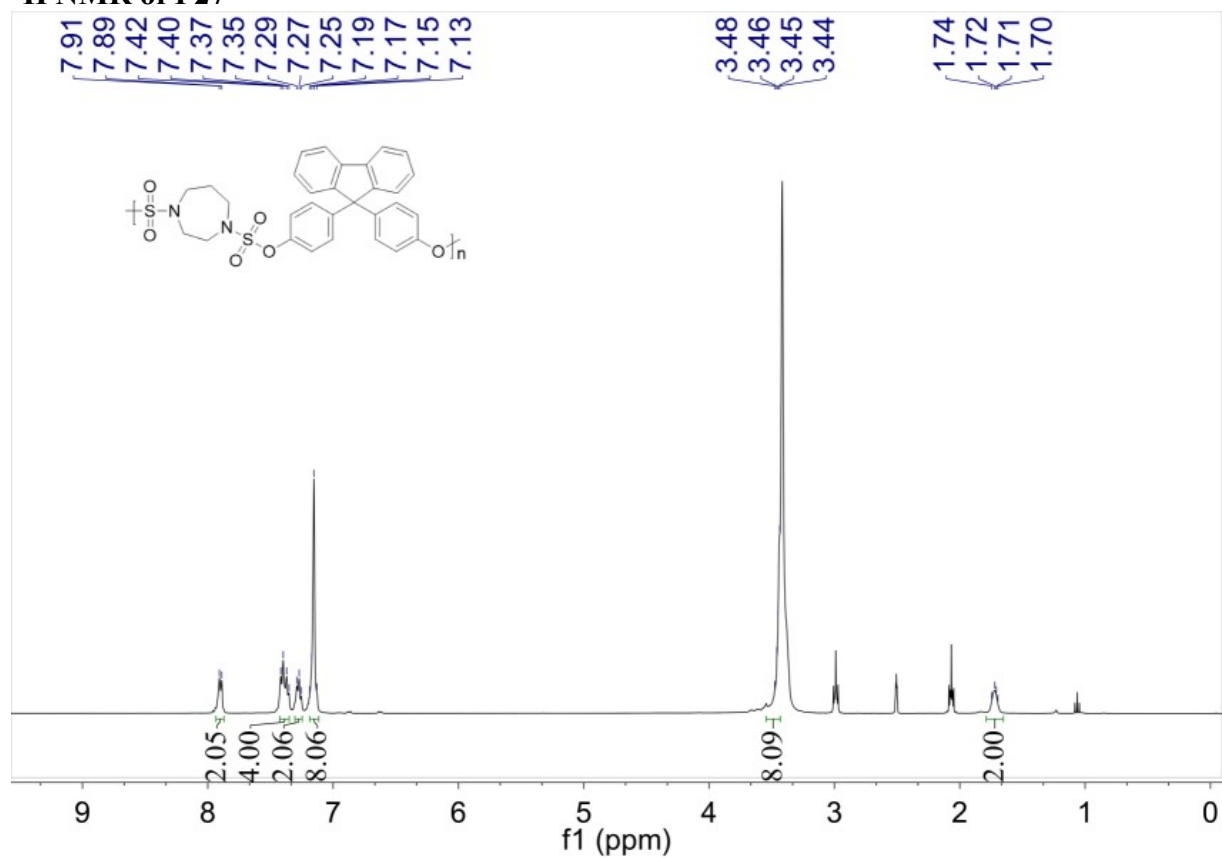

### <sup>13</sup>C NMR of P27

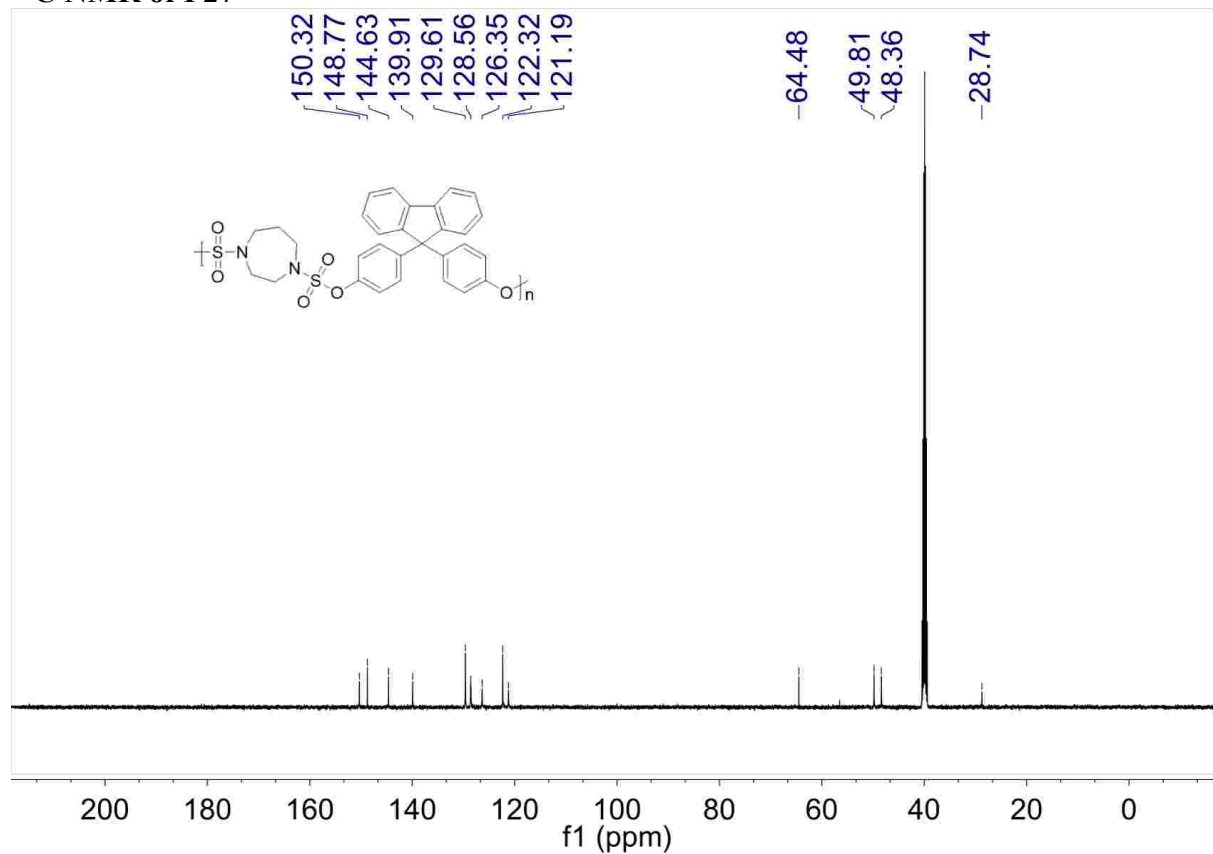

### <sup>1</sup>H NMR of P28

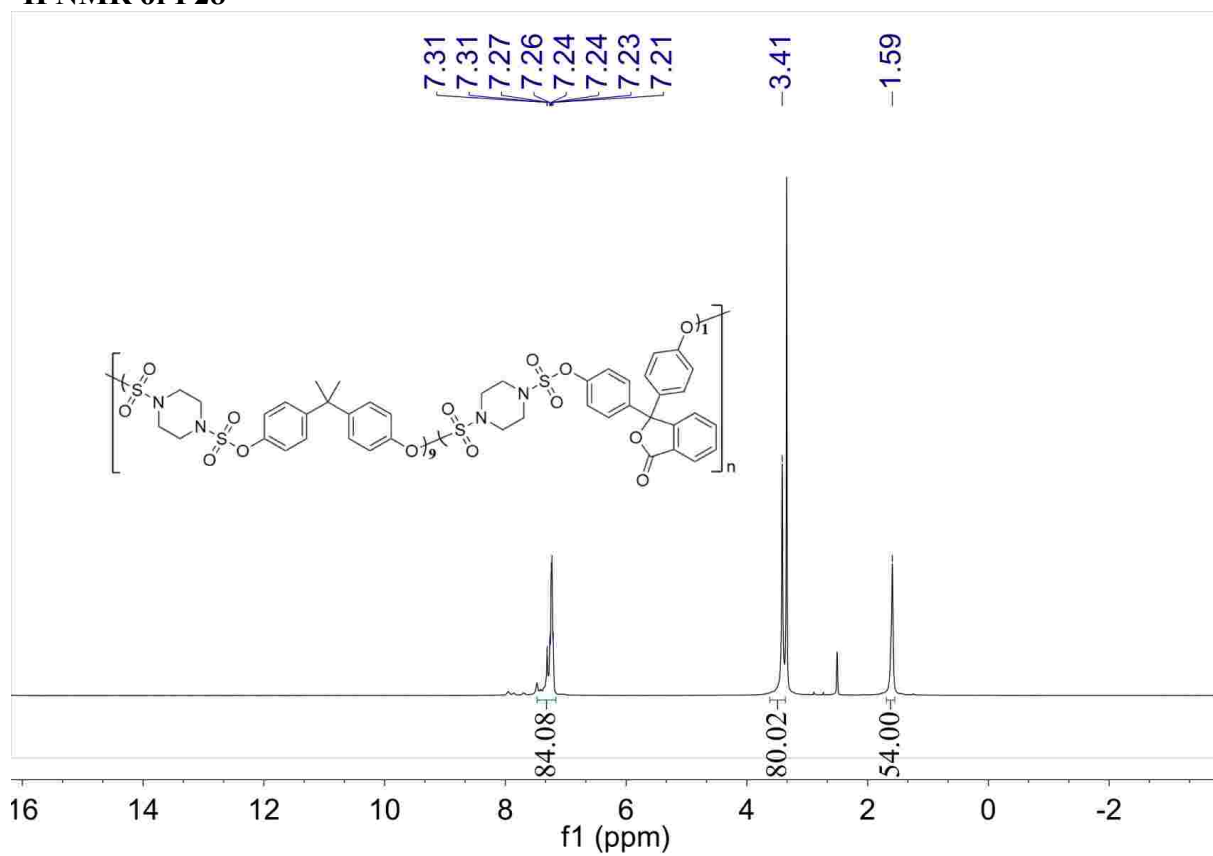

### <sup>13</sup>C NMR of P28

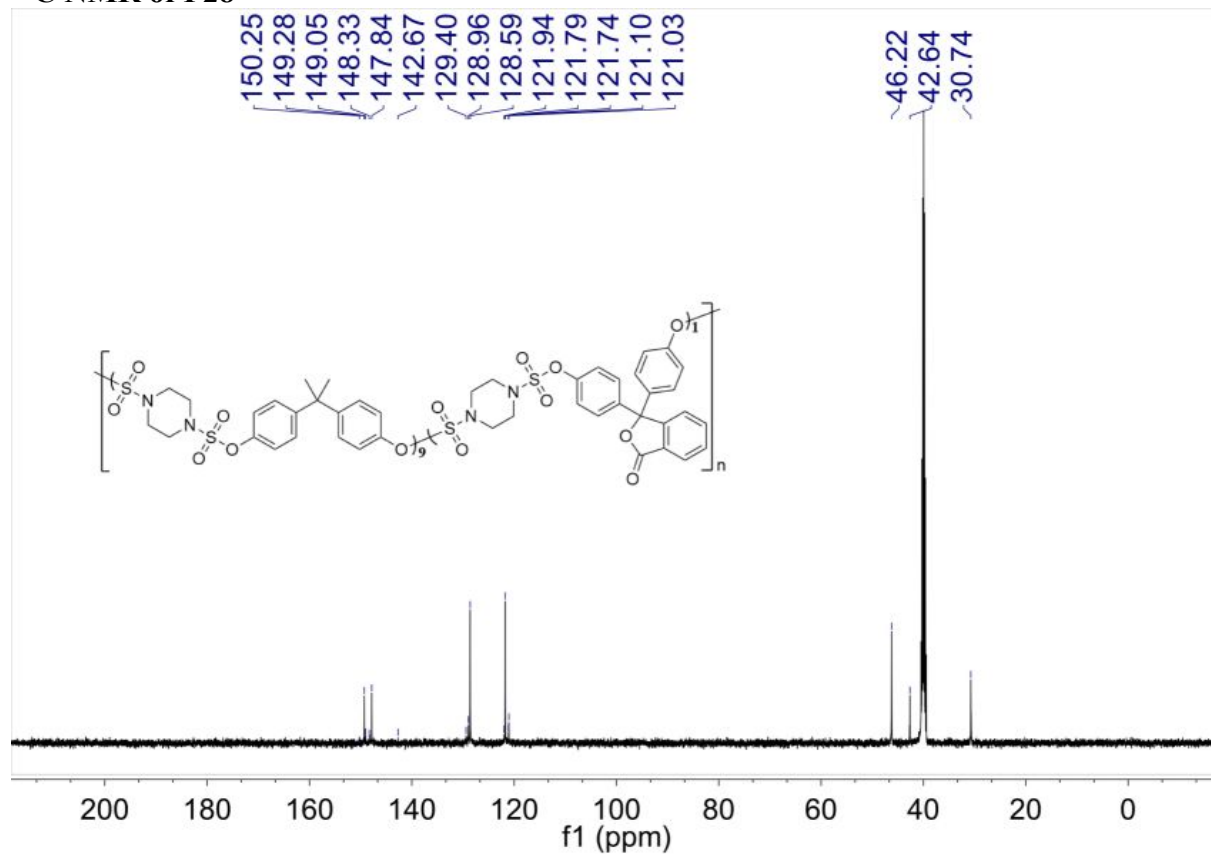

### 7.3 Copies of the DSC curves of polymers

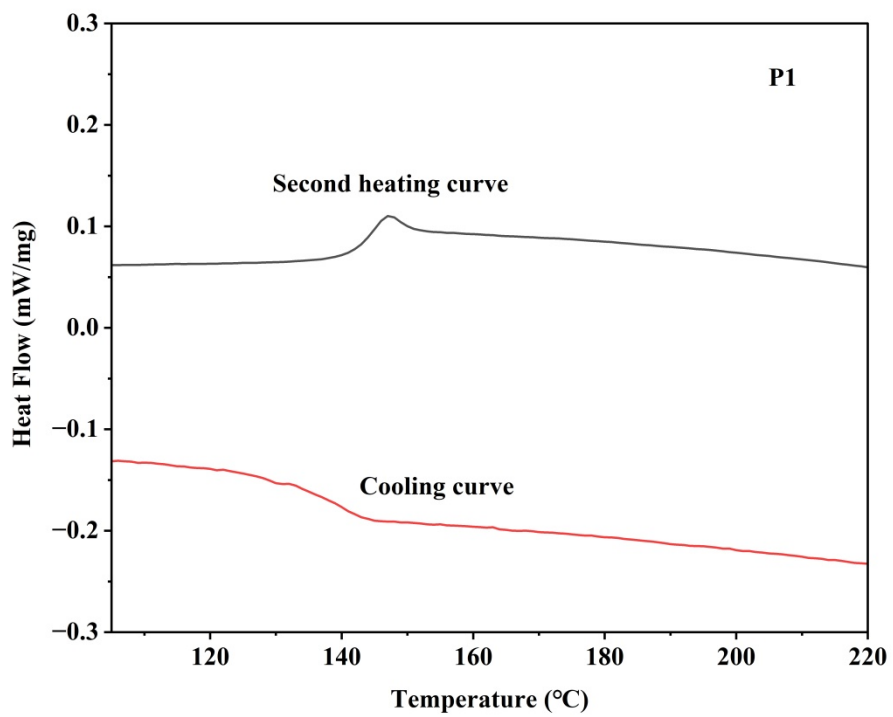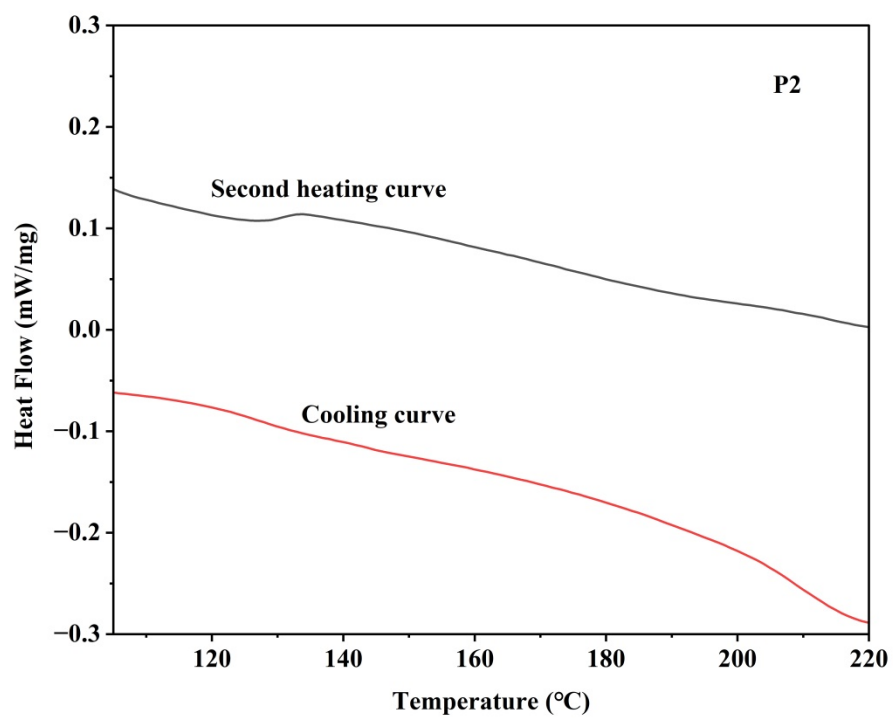

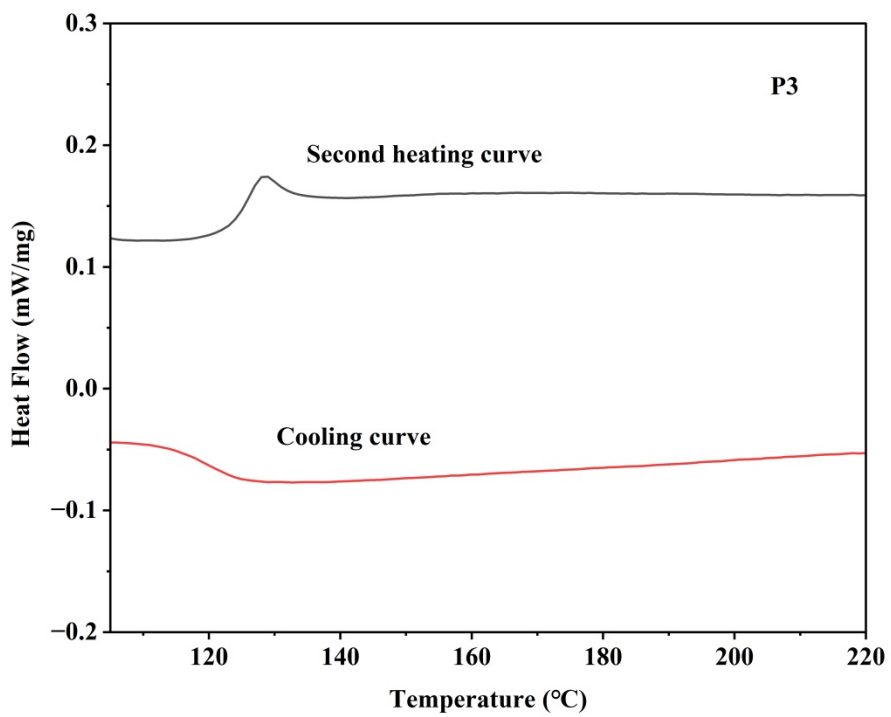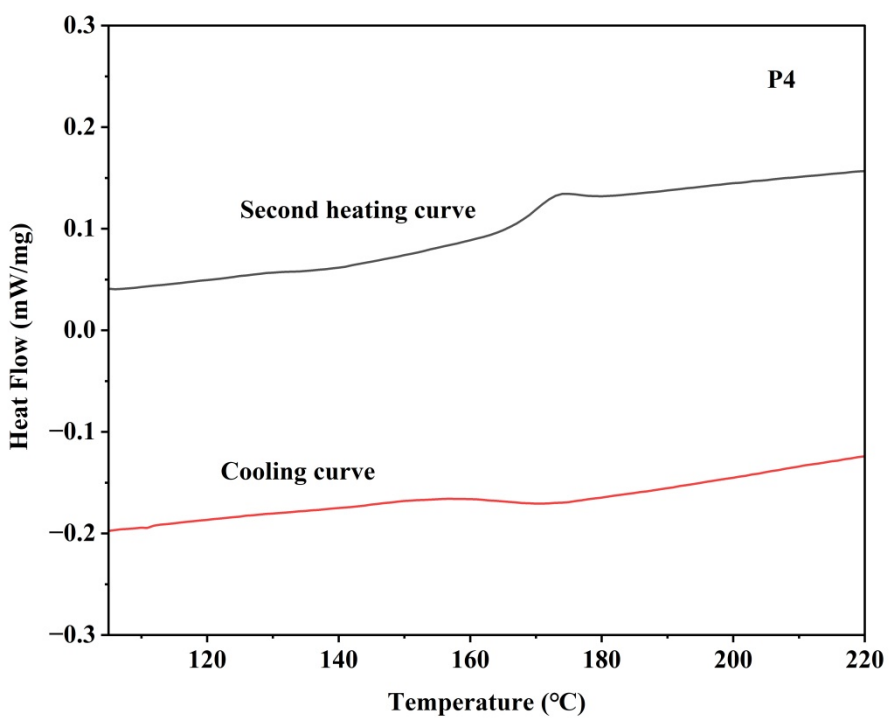

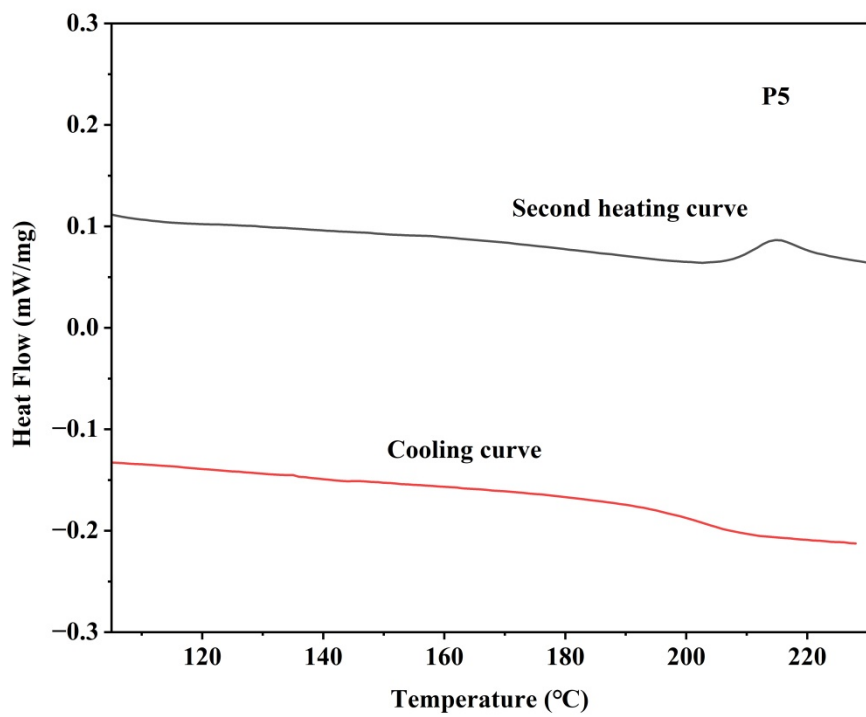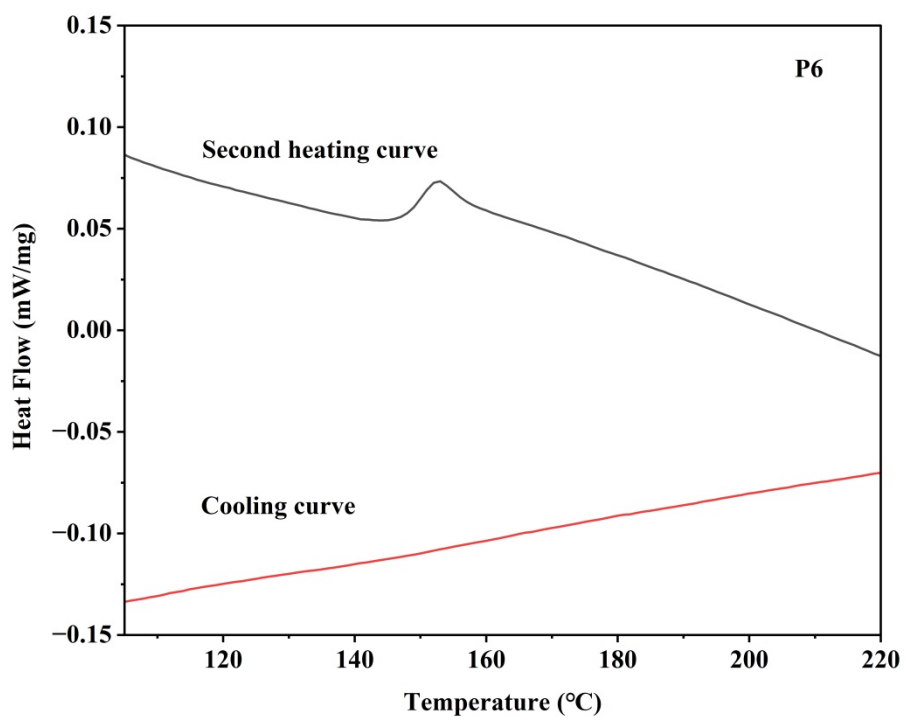

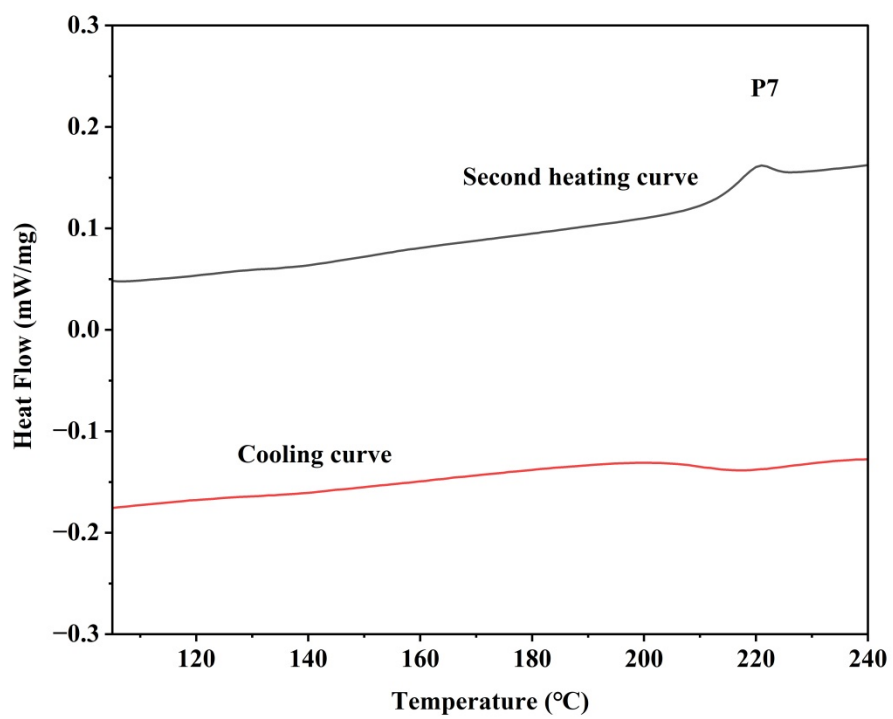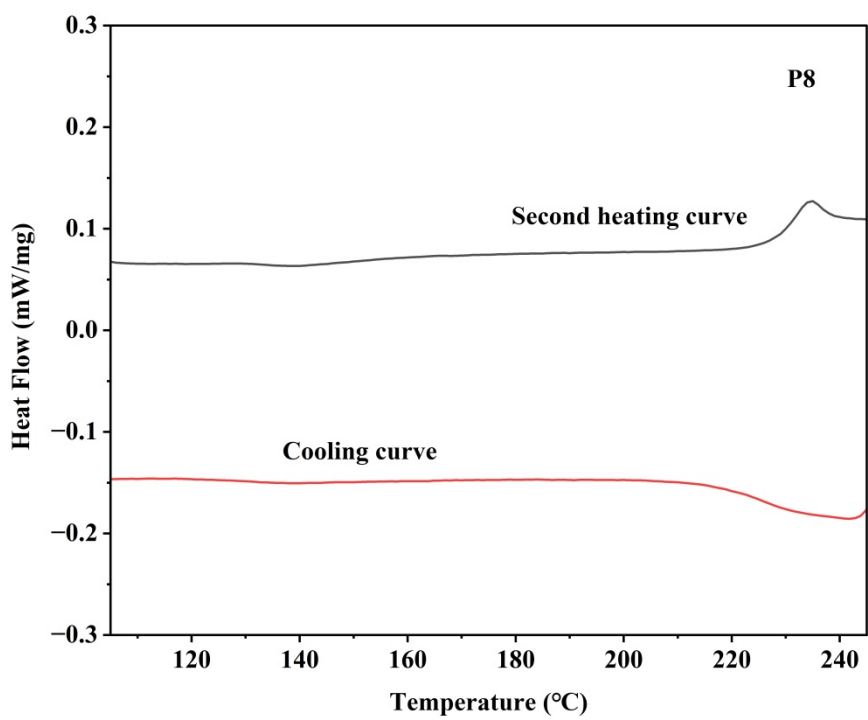

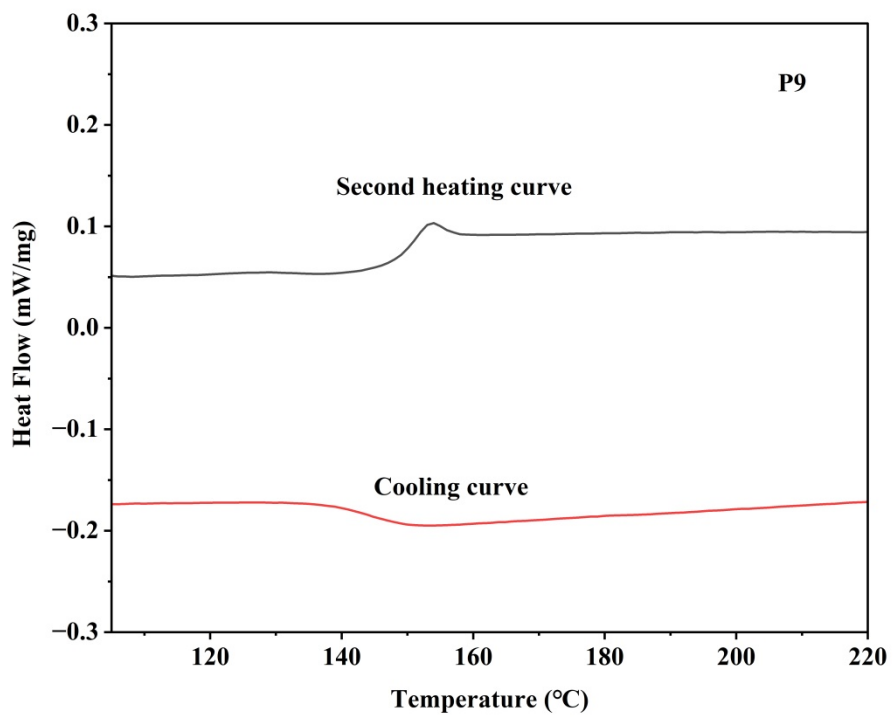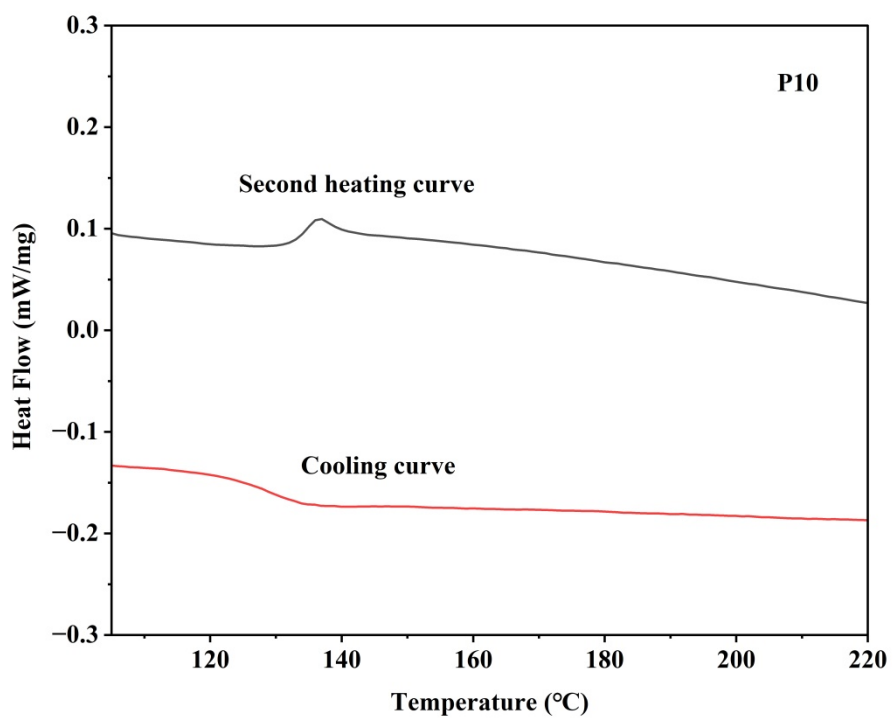



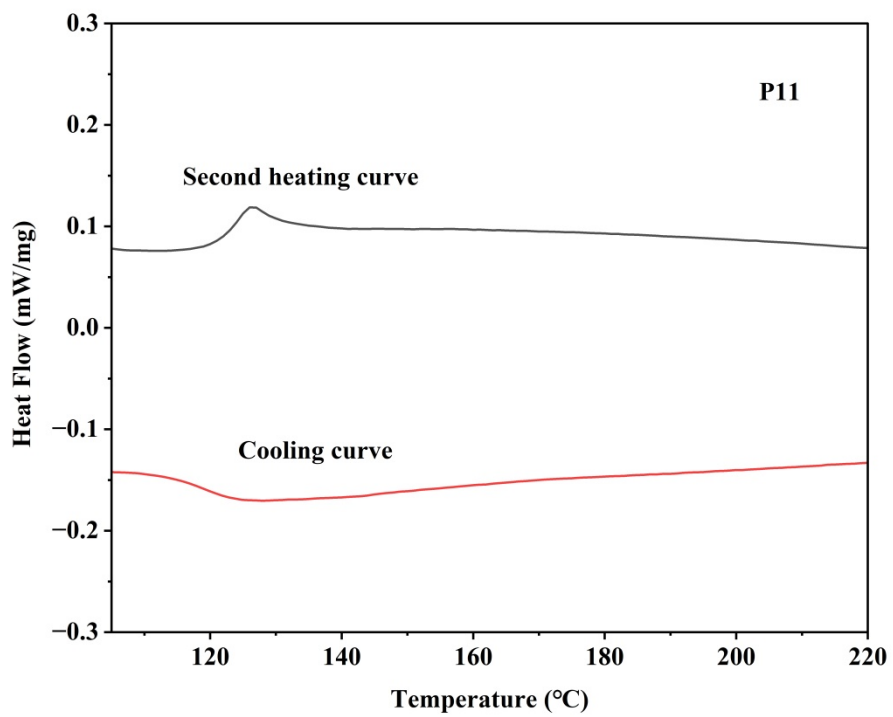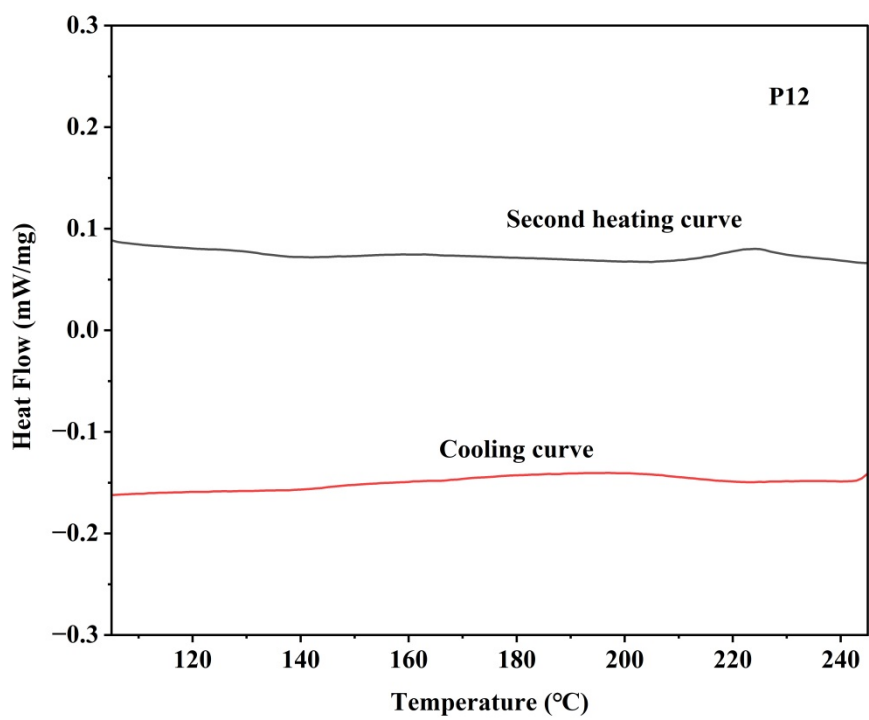

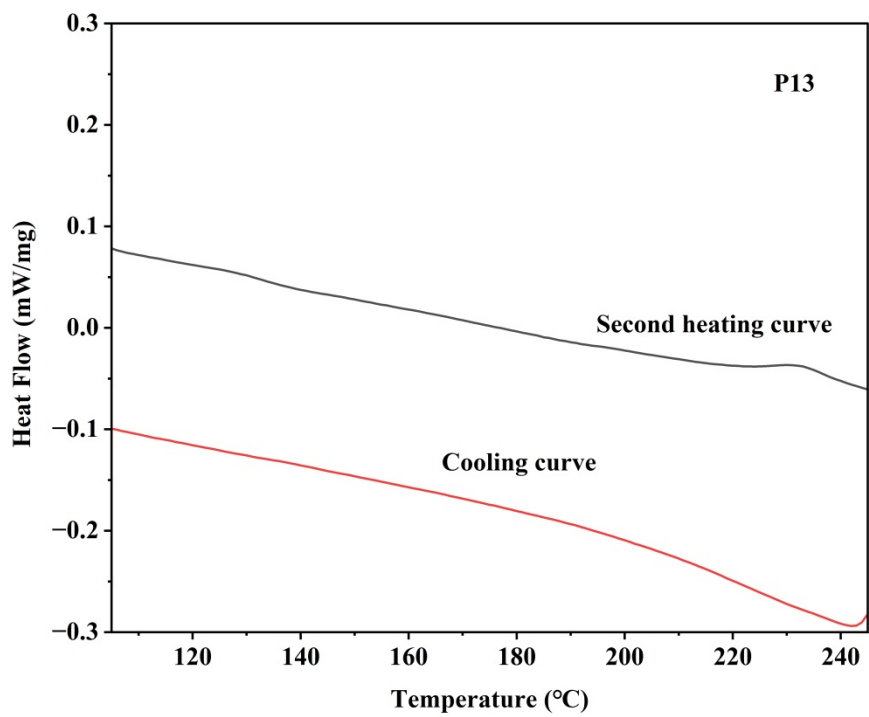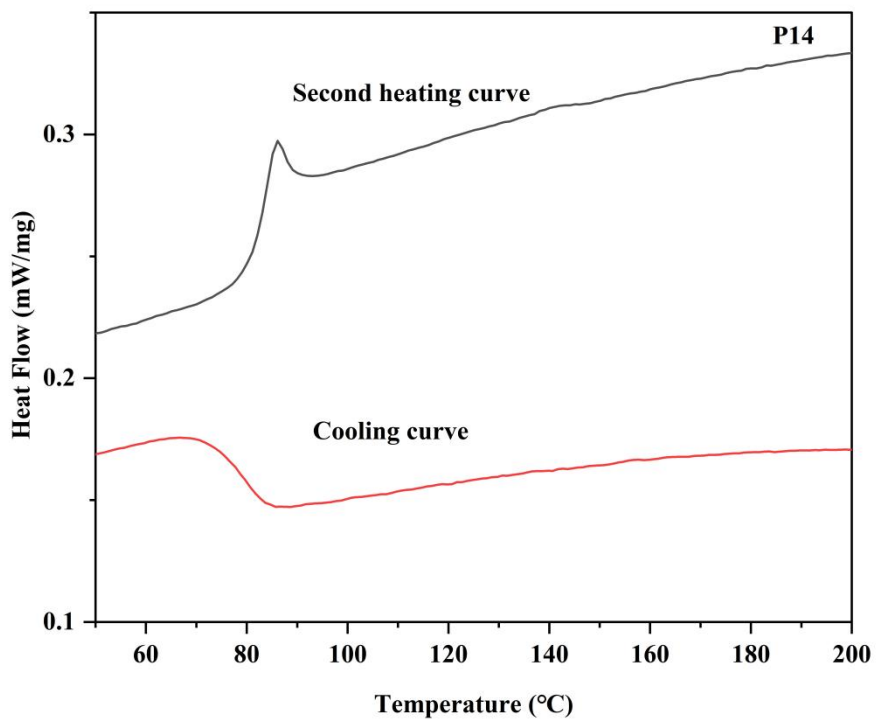

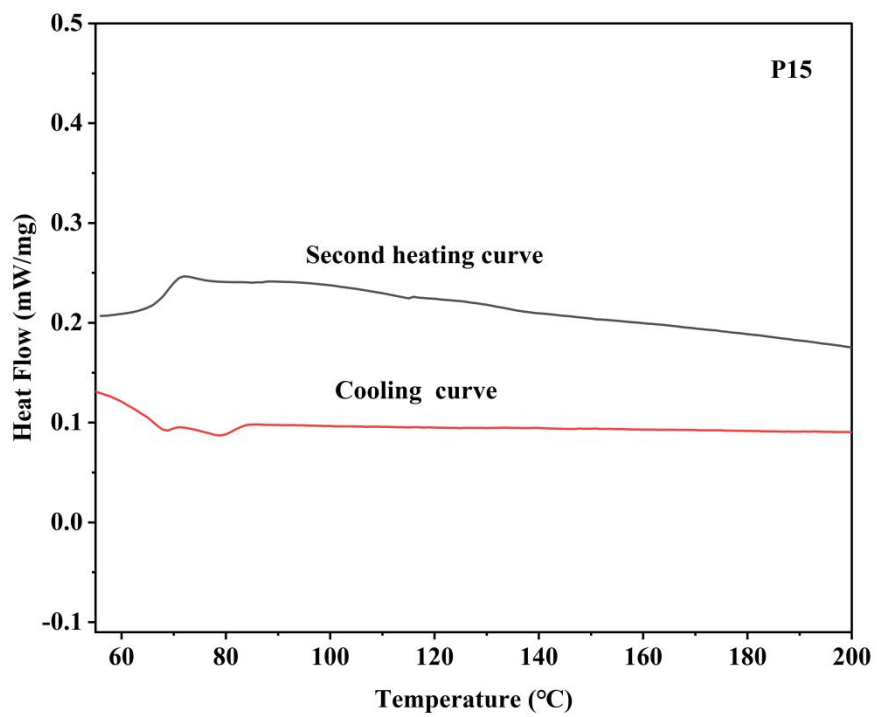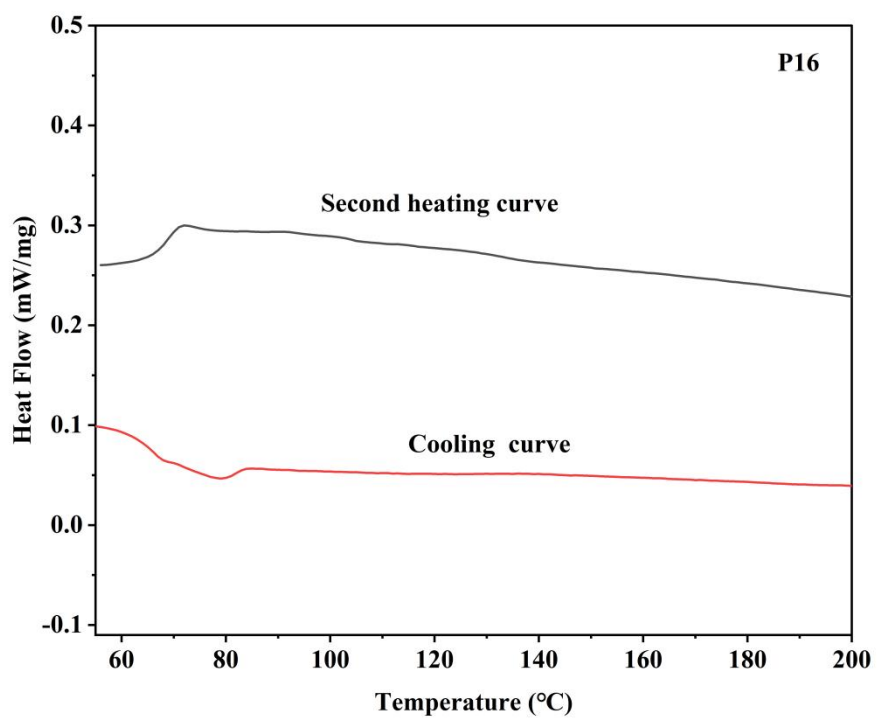

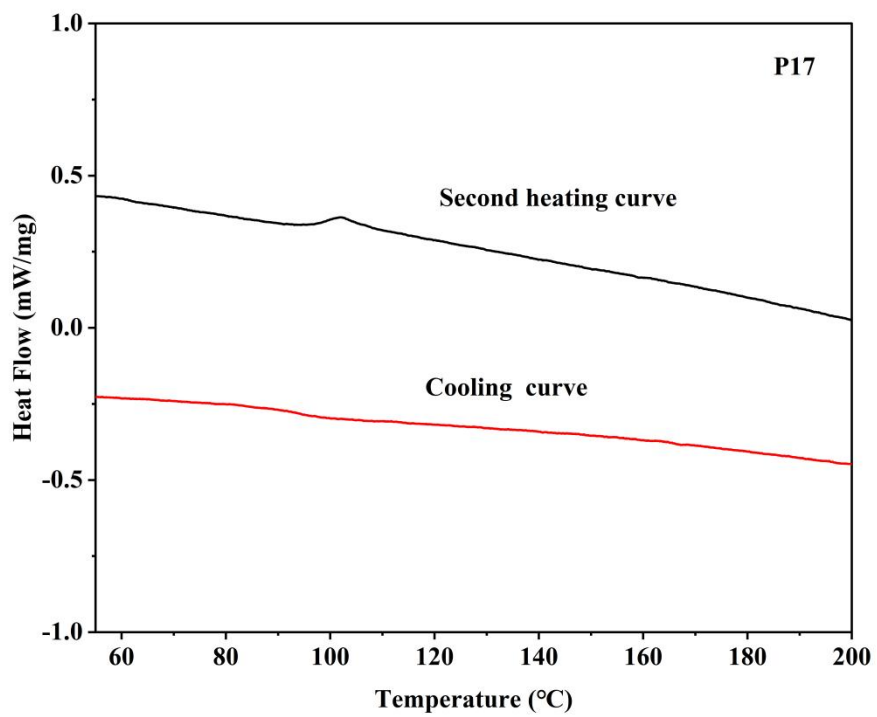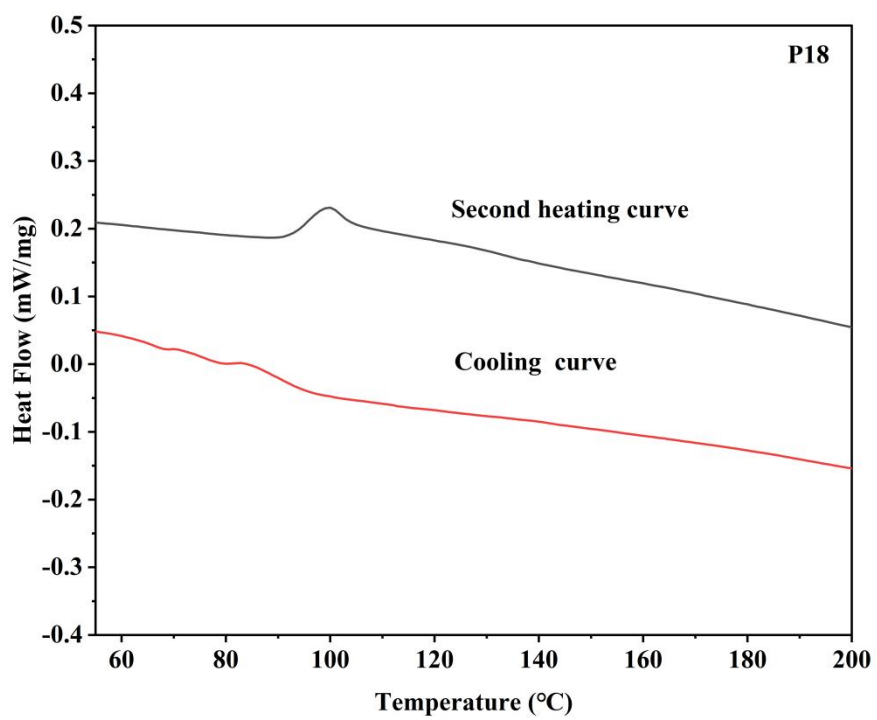

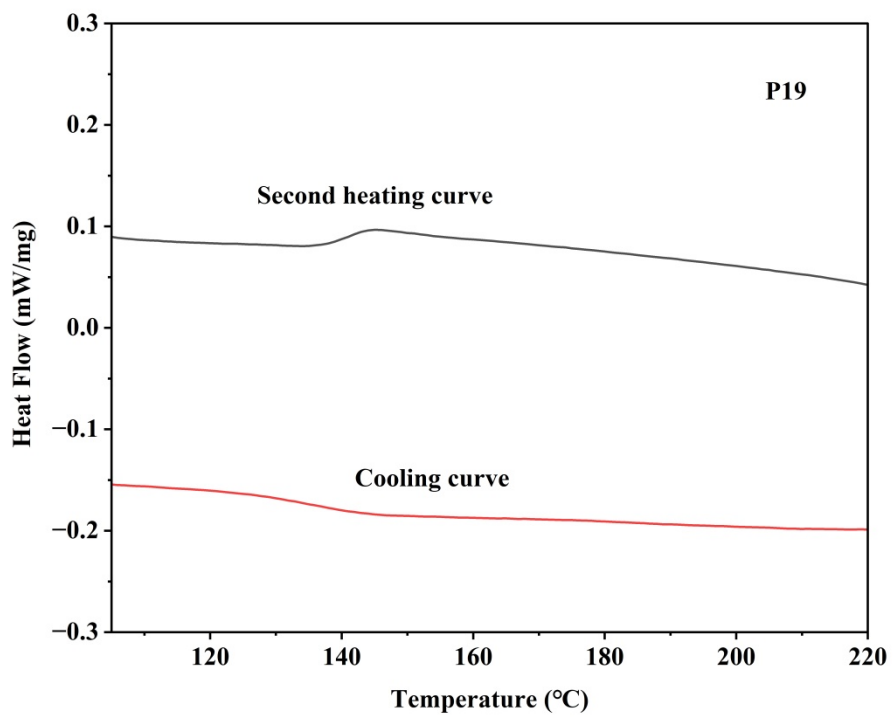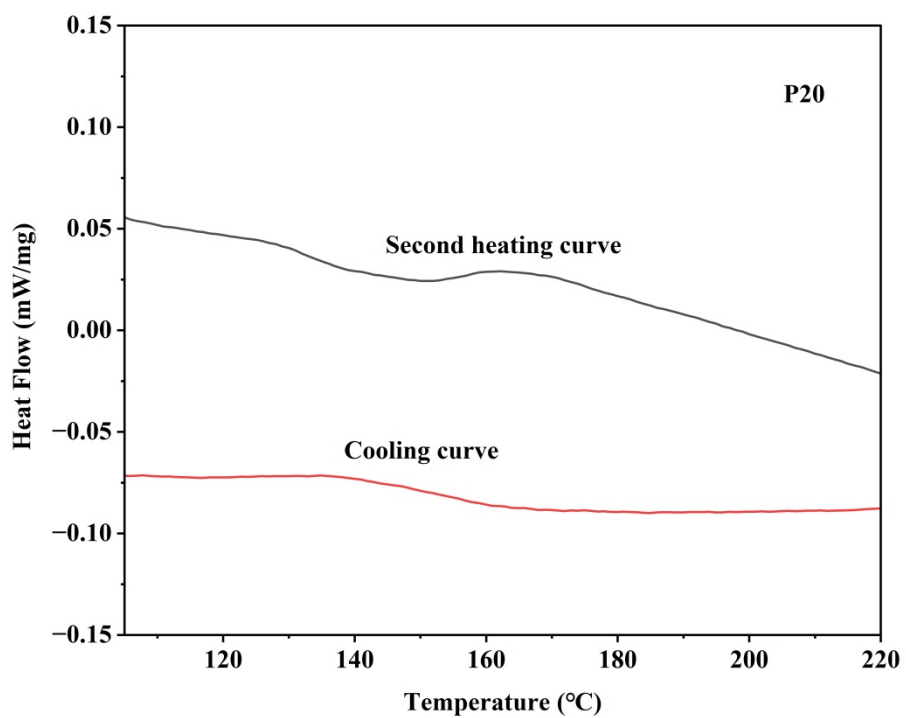

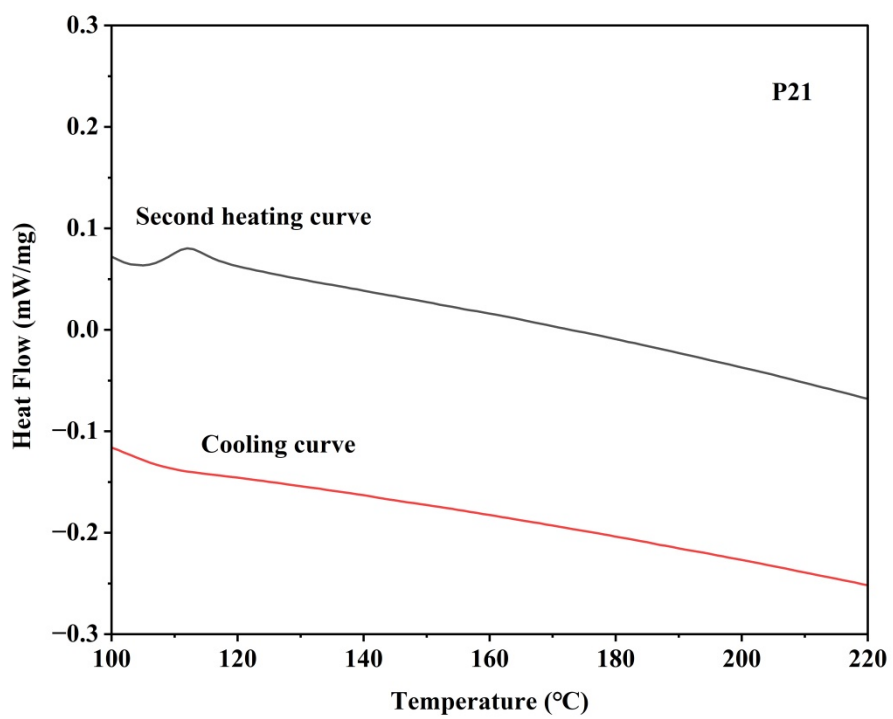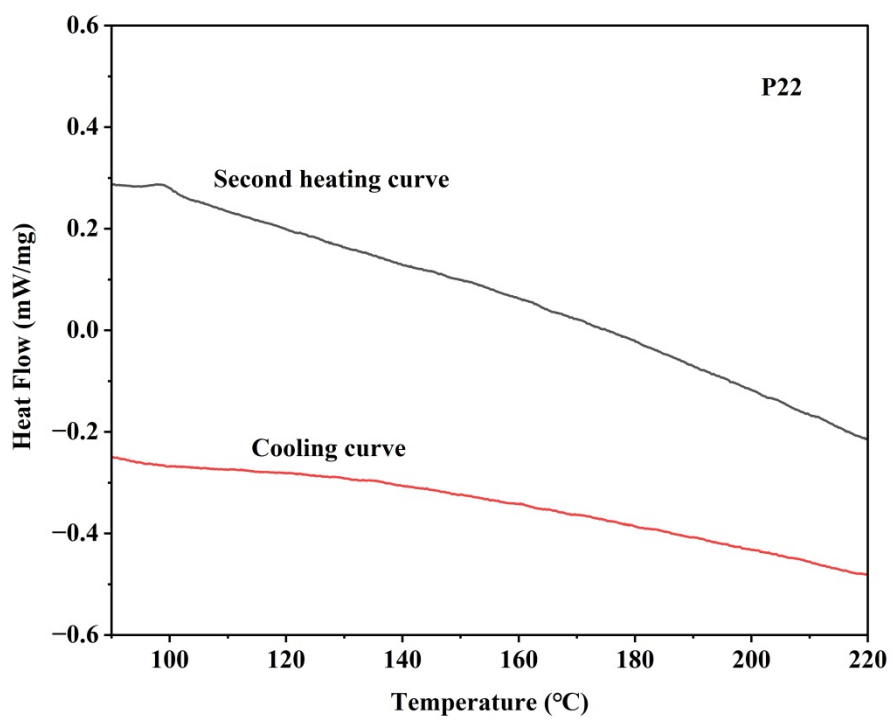

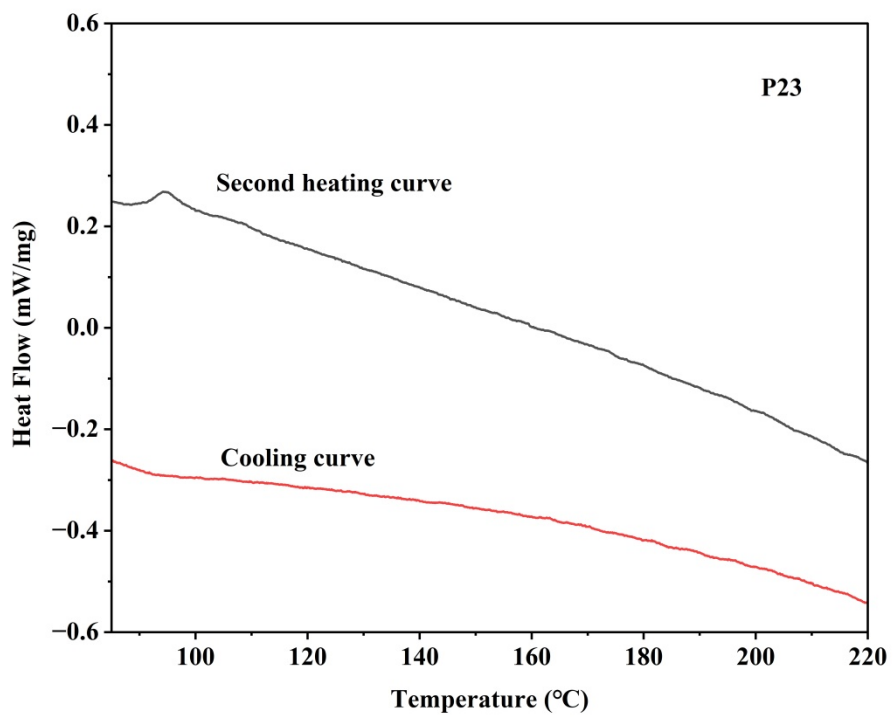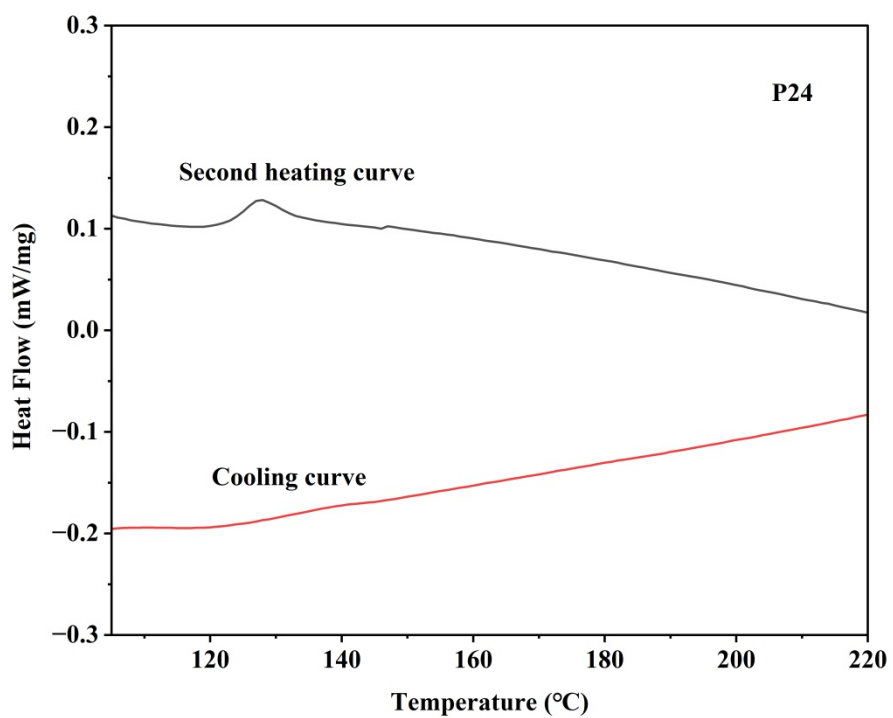

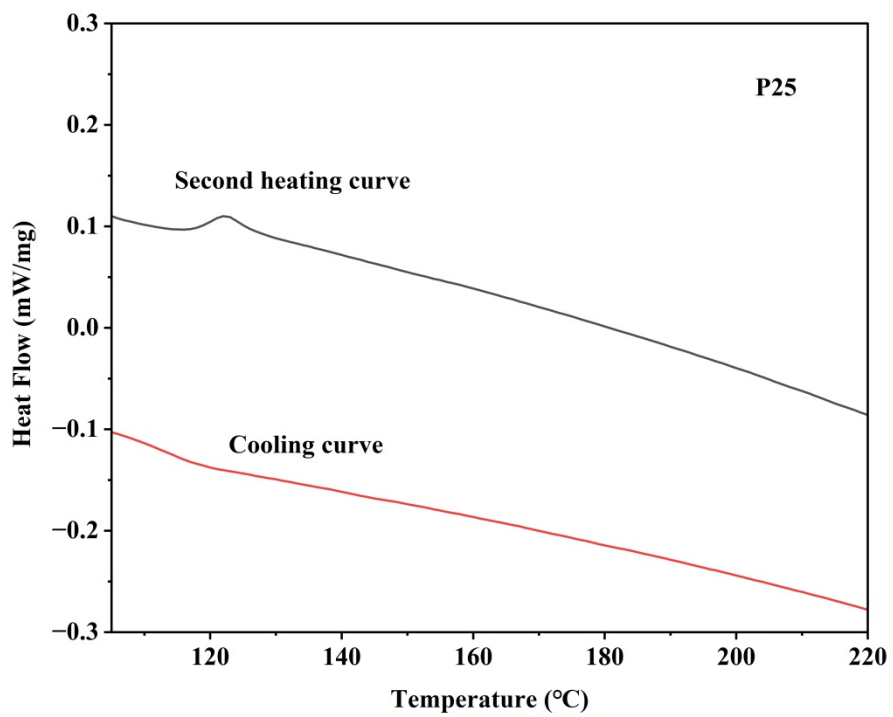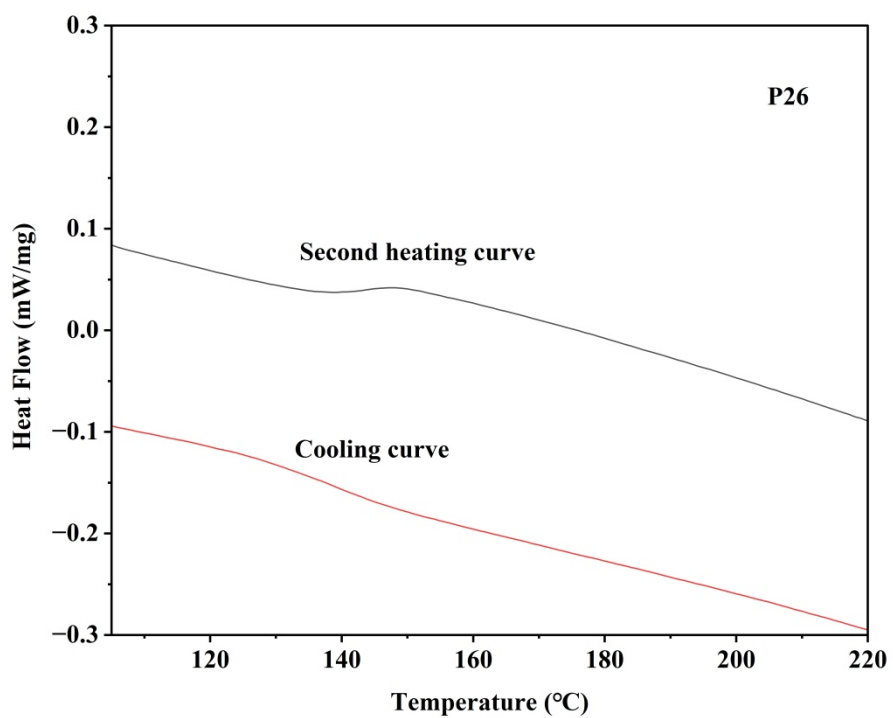



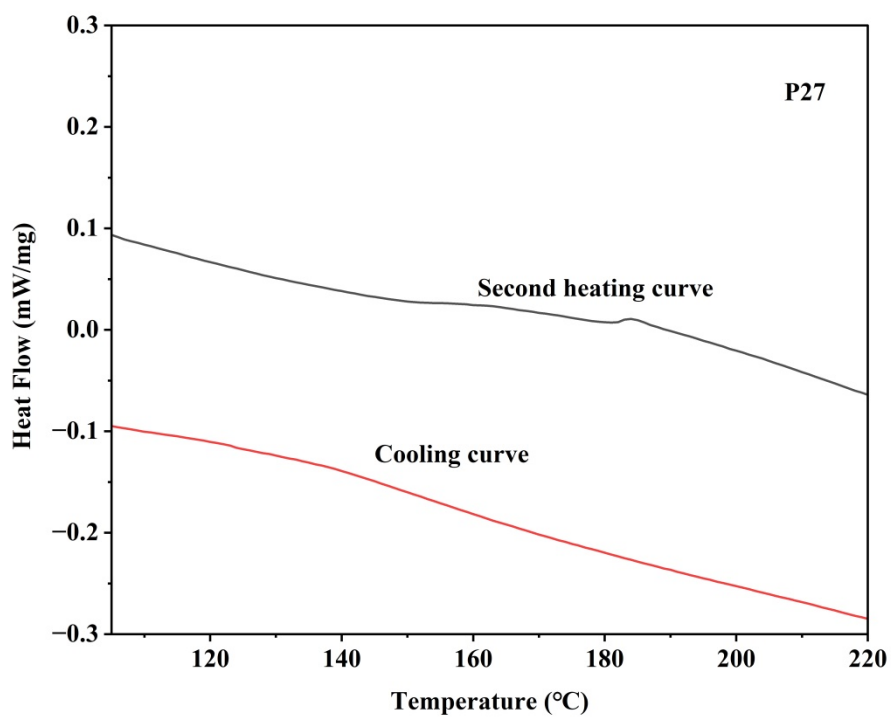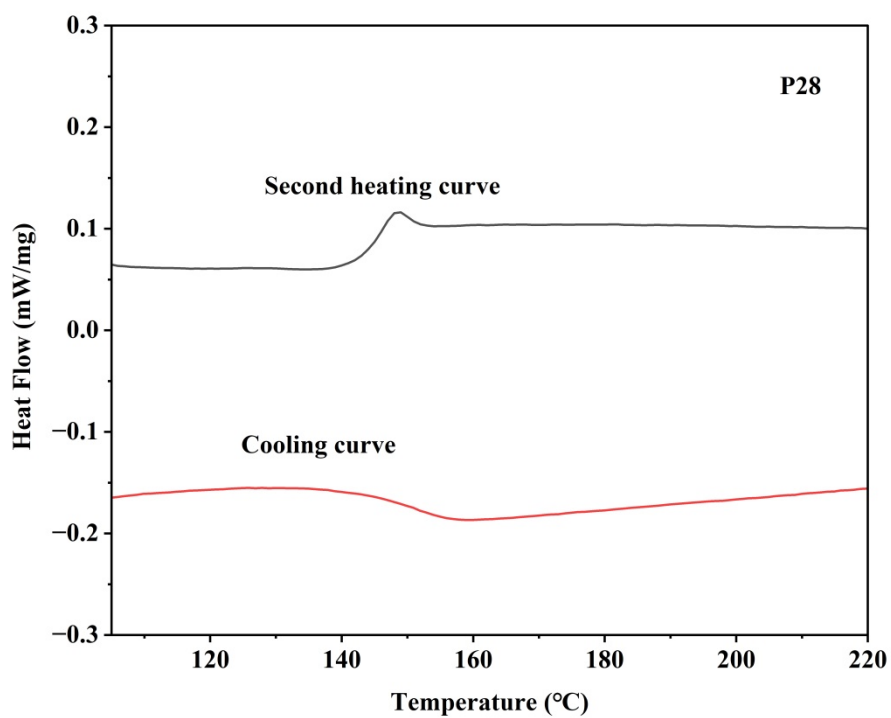

#### 7.4 Copies of the GPC traces of polymers

# GPC trace of P1

2024/5/25 10:49

色谱图 D:\GPC-色谱图\2024\0240525\24052401-2.prm

第1页/共1页

白银图微新材料科技有限公司

**色谱图信息:**

文件名 : D:\GPC-色谱图\2024\0240525\24052401-2.prm 建立文件 : 2024/5/25 10:47:22  
 初始 : 采集, 采集启动2024/5/25 10:32:21 采集数据 : 2024/5/25 10:47:21  
 ...原始项目 : 仪器测试 通过 : Administrator

**打印版本信息:**

打印版本 : - #2; 2024/5/25 10:49:04, IA: 8.0 Rev.1 最近(链接的校准) 打印数据 : 2024/5/25 10:49:04  
 编辑格式 : D:\W5100\DataFiles\Common\模板.sty 通过 : Administrator  
 校准文件 : D:\校准曲线\2024\校准曲线2024.05.cal  
 项目 : 仪器测试

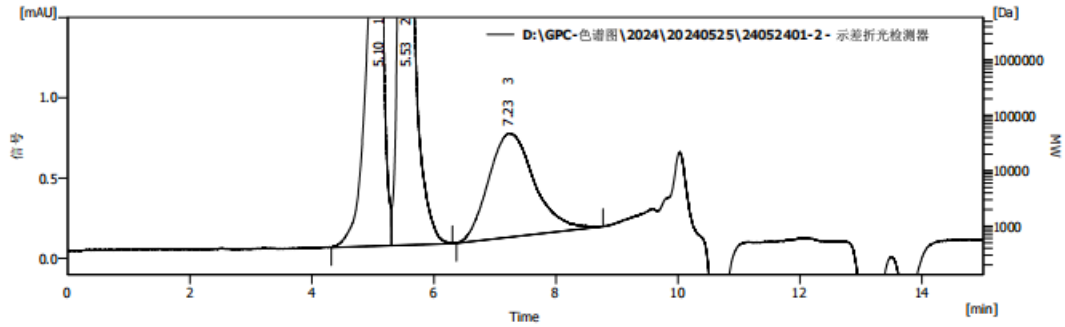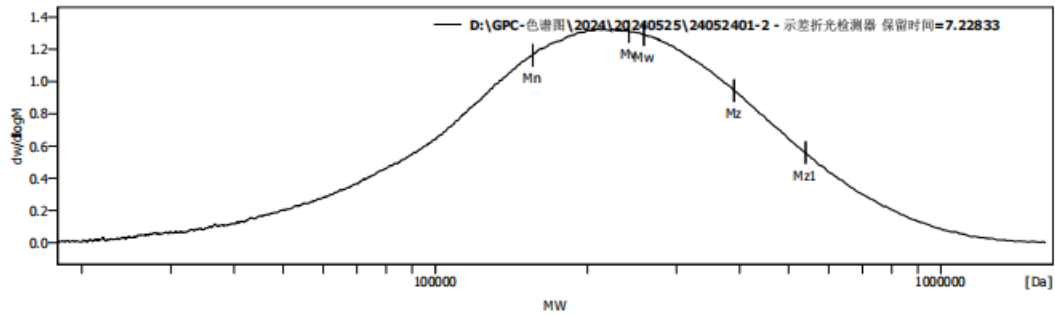

结果表(D:\校准曲线\2024\校准曲线2024.05 - 通用空峰流速修正 - D:\GPC-色谱图\2024\0240525\24052401-2 - 示差折光检测器)  
 方程式:  $Y = -0.00664X^3 + 0.23626X^2 - 3.24007X + 18.97824$   
 相关因子: 0.9996642

|   | 最大保留时间 | 起始保留时间 | 结束保留时间 | 流速修正   | Mp       | Mn       | Mw       | Mz        | Mz1       | Mv       | PD     | 峰高 (mAU) | 峰高 (%) | 峰面积 (mAU.s) | 峰面积 (%) |
|---|--------|--------|--------|--------|----------|----------|----------|-----------|-----------|----------|--------|----------|--------|-------------|---------|
| 1 | 5.10   | 4.32   | 5.30   | 1.0000 | 51548732 | 61097410 | 73963056 | 101670612 | 164201655 | 71252148 | 1.2106 | 3.16     | 29.97  | 49.34       | 29.73   |
| 2 | 5.53   | 5.30   | 6.30   | 1.0000 | 14360788 | 12393445 | 13881244 | 15038429  | 16044891  | 13695090 | 1.1200 | 6.73     | 63.88  | 82.84       | 49.91   |
| 3 | 7.23   | 6.37   | 8.77   | 1.0000 | 247460   | 155952   | 258696   | 390224    | 540430    | 241791   | 1.6588 | 0.65     | 6.15   | 33.79       | 20.36   |

# GPC trace of P2

2024/3/21 18:17

色谱图 D:\GPC-色谱图\2024\20240321\J-134-1.prm

第1页/共1页

白银图微新材料科技有限公司

### 色谱图信息:

文件名 : D:\GPC-色谱图\2024\20240321\J-134-1.prm 建立文件 : 2024/3/21 18:00:50  
 初始 : 采集, 采集启动2024/3/21 17:45:49 采集数据 : 2024/3/21 18:00:50  
 ...原始项目 : 仪器测试 通过 : Administrator

### 打印版本信息:

打印版本 : - #2; 2024/3/21 18:17:16, IA: 8.0 Rev.1 最近(链接的校准) 打印数据 : 2024/3/21 18:17:16  
 编辑格式 : D:\W5100\DataFiles\Common\模板.sty 通过 : Administrator  
 校准文件 : D:\校准曲线\2024\校准曲线2024.03.cal  
 项目 : 仪器测试

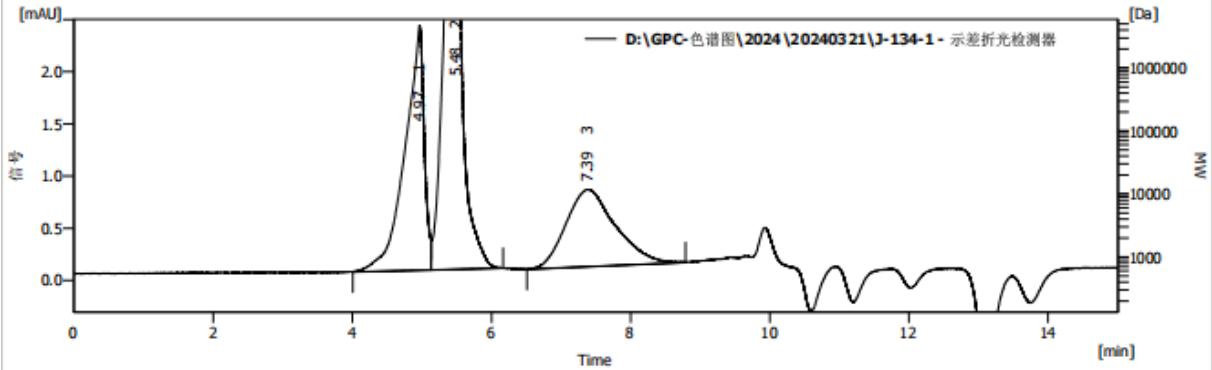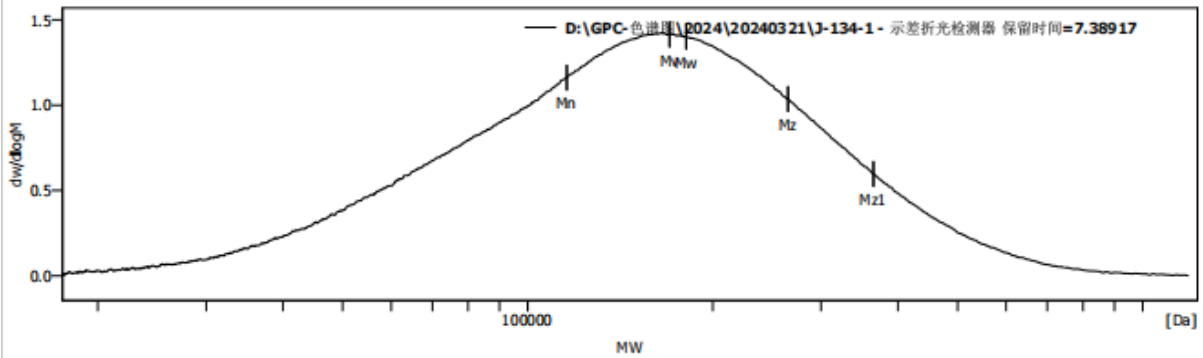

结果表(D:\校准曲线\2024\校准曲线202403 - 通用窄峰流速修正 - D:\GPC-色谱图\2024\20240321\J-134-1 - 示差折光检测器)  
 方程式:  $Y = -0.00999X^3 + 0.32504X^2 - 4.0111X + 21.16817$   
 相关因子: 0.9996522

|   | 最大保留时间 | 起始保留时间 | 结束保留时间 | 流速修正   | Mp        | Mn        | Mw        | Mz        | Mz1        | Mv        | PD     | 峰高 [mAU] | 峰高 [%] | 峰面积 [mAU.s] | 峰面积 [%] |
|---|--------|--------|--------|--------|-----------|-----------|-----------|-----------|------------|-----------|--------|----------|--------|-------------|---------|
| 1 | 4.97   | 4.00   | 5.13   | 1.0000 | 109910867 | 145677875 | 224045261 | 538624233 | 1401743995 | 202932390 | 1.5379 | 2.35     | 29.55  | 44.88       | 27.74   |
| 2 | 5.48   | 5.13   | 6.17   | 1.0000 | 20402739  | 19590704  | 23462435  | 27268866  | 31228136   | 22909367  | 1.1976 | 4.86     | 61.11  | 80.04       | 49.47   |
| 3 | 7.39   | 6.51   | 8.79   | 1.0000 | 177029    | 115821    | 181057    | 265186    | 365046     | 170236    | 1.5633 | 0.74     | 9.33   | 36.88       | 22.79   |

# GPC trace of P3

2023/3/4 14:26

色谱图 D:\GPC-2023\20230304\Y-012-01.pm

第1页/共1页

白银图微新材料科技有限公司

## 色谱图信息:

文件名 : D:\GPC-2023\20230304\Y-012-01.pm 建立文件 : 2023/3/4 14:19:11  
 初始 : 采集, 采集自动2023/3/4 14:04:10 采集数据 : 2023/3/4 14:19:11  
 ...原始项目 : 仪器测试 通过 : Administrator

## 打印版本信息:

打印版本 : - #2; 2023/3/4 14:26:20, IA: 8.0 Rev.1 最近(链接的校准) 打印数据 : 2023/3/4 14:26:20  
 编辑格式 : D:\W5100\DataFiles\Common\模板.sty 通过 : Administrator  
 校准文件 : D:\校准曲线\校准曲线202301.cal  
 项目 : 仪器测试

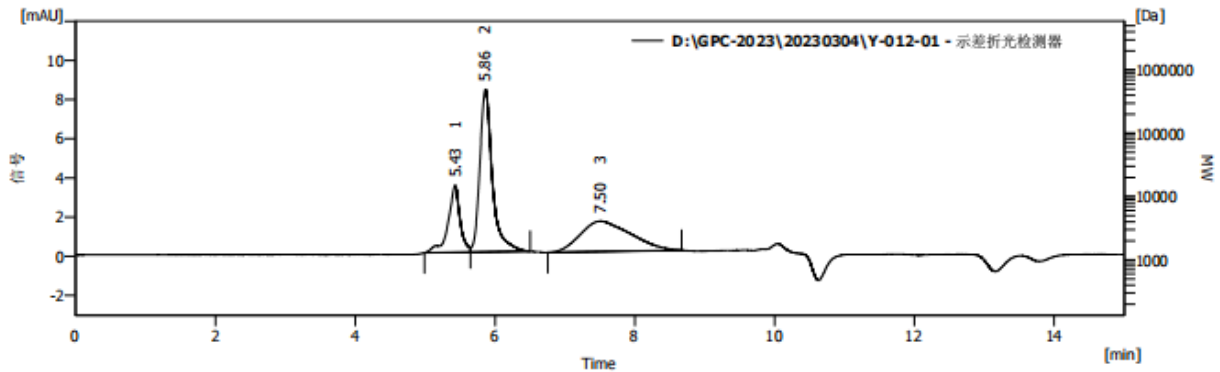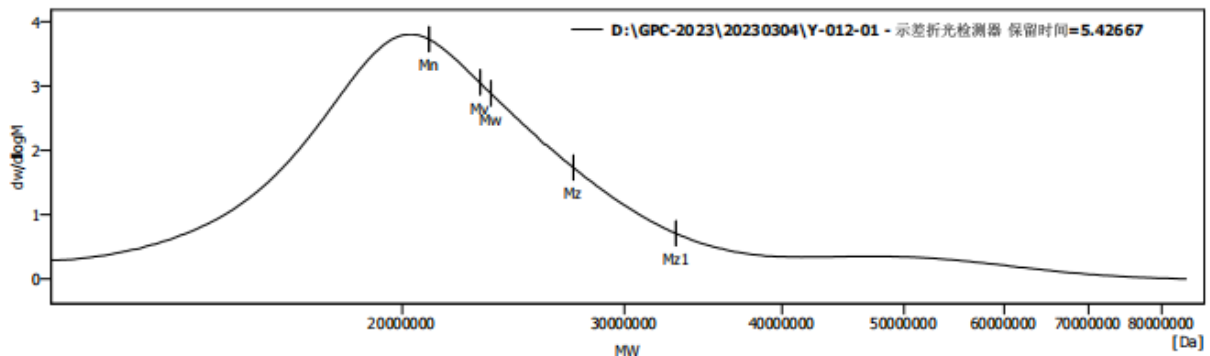

结果表(D:\校准曲线\校准曲线202301 - 通用窄峰流速修正 - D:\GPC-2023\20230304\Y-012-01 - 示差折光检测器)  
 方程式:  $Y = -0.01016 * X^3 + 0.32541 * X^2 - 3.96692 * X + 20.87943$   
 相关因子: 0.9996180

|   | 最大保留时间 | 起始保留时间 | 结束保留时间 | 流速修正   | Mp       | Mn       | Mw       | Mz       | Mz1      | Mv       | PD     | 峰高 [mAU] | 峰高 [%] | 峰面积 [mAU.s] | 峰面积 [%] |
|---|--------|--------|--------|--------|----------|----------|----------|----------|----------|----------|--------|----------|--------|-------------|---------|
| 1 | 5.43   | 4.99   | 5.65   | 1.0000 | 20451257 | 21014511 | 23526811 | 27345668 | 32973863 | 23064248 | 1.1196 | 3.41     | 25.68  | 40.67       | 18.25   |
| 2 | 5.86   | 5.65   | 6.50   | 1.0000 | 5770568  | 4933366  | 5453729  | 5858241  | 6198416  | 5388015  | 1.1055 | 8.31     | 62.54  | 103.73      | 46.55   |
| 3 | 7.50   | 6.75   | 8.67   | 1.0000 | 137884   | 90636    | 128319   | 174381   | 223201   | 122102   | 1.4158 | 1.57     | 11.78  | 78.43       | 35.20   |

# GPC trace of P4

2024/3/22 18:48

色谱图 D:\GPC-色谱图\2024\20240322\L-1119-3.ppm

第1页/共1页

白银图微新材料科技有限公司

## 色谱图信息:

文件名 : D:\GPC-色谱图\2024\20240322\L-1119-3.ppm 建立文件 : 2024/3/22 18:32:50  
 初始 : 采集, 采集启动2024/3/22 18:17:49 采集数据 : 2024/3/22 18:32:50  
 ...原始项目 : 仪器测试 通过 : Administrator

## 打印版本信息:

打印版本 : - #2; 2024/3/22 18:48:32, IA: 8.0 Rev.1 最近(链接的校准) 打印数据 : 2024/3/22 18:48:32  
 编辑格式 : D:\W5100\DataFiles\Common\模板.sty 通过 : Administrator  
 校准文件 : D:\校准曲线\2024\校准曲线2024.03.cal  
 项目 : 仪器测试

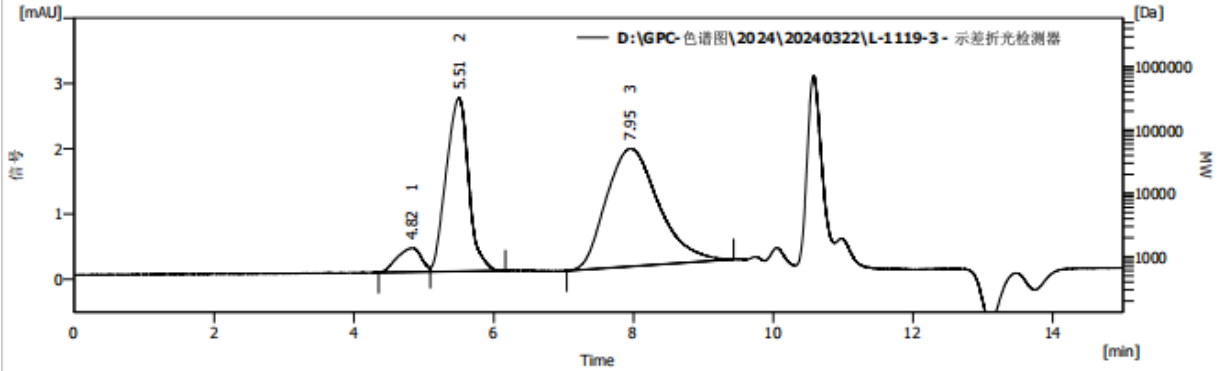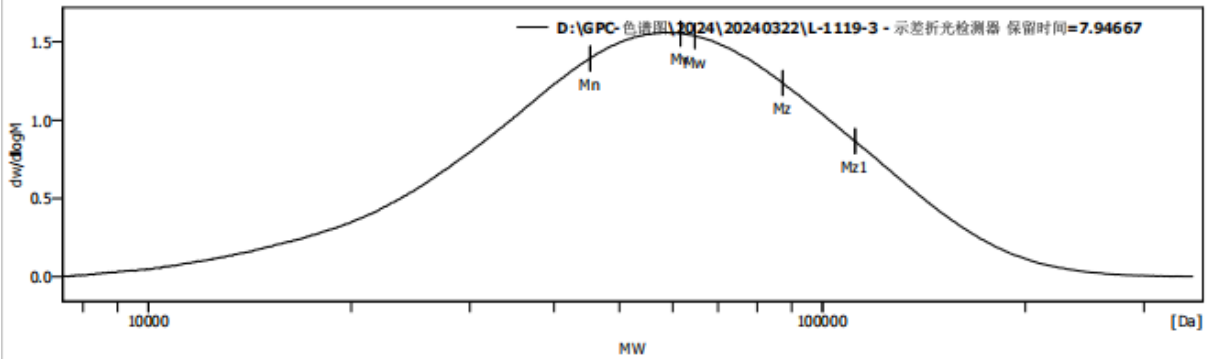

结果表(D:\校准曲线\2024\校准曲线2024.03 - 通用窄峰流速修正 - D:\GPC-色谱图\2024\20240322\L-1119-3 - 示差折光检测器)  
 方程式:  $Y = -0.009999X^3 + 0.325049X^2 - 4.0111X + 21.16817$   
 相关因子: 0.9996522

|   | 最大保留时间 | 起始保留时间 | 结束保留时间 | 流速修正   | Mp        | Mn        | Mw        | Mz        | Mz1       | Mv        | PD     | 峰高 (mAU) | 峰高 (%) | 峰面积 (mAU.s) | 峰面积 (%) |
|---|--------|--------|--------|--------|-----------|-----------|-----------|-----------|-----------|-----------|--------|----------|--------|-------------|---------|
| 1 | 4.82   | 4.35   | 5.09   | 1.0000 | 185348913 | 186000767 | 246966426 | 331813146 | 428746841 | 236074857 | 1.3278 | 0.37     | 7.66   | 8.95        | 5.51    |
| 2 | 5.51   | 5.09   | 6.17   | 1.0000 | 18593161  | 17648631  | 21987522  | 26902479  | 32208415  | 21306821  | 1.2458 | 2.66     | 54.92  | 59.24       | 36.46   |
| 3 | 7.95   | 7.04   | 9.43   | 1.0000 | 64339     | 45246     | 64700     | 87373     | 111854    | 61617     | 1.4299 | 1.81     | 37.42  | 94.29       | 58.03   |

# GPC trace of P5

2023/3/4 14:20

色谱图 D:\GPC-2023\20230304\Y-011-01.pm

第1页/共1页

白银图微新材料科技有限公司

## 色谱图信息:

文件名 : D:\GPC-2023\20230304\Y-011-01.pm 建立文件 : 2023/3/4 14:03:31  
 初始 : 采集, 采集启动2023/3/4 13:48:30 采集数据 : 2023/3/4 14:03:31  
 ...原始项目 : 仪器测试 通过 : Administrator

## 打印版本信息:

打印版本 : - #2; 2023/3/4 14:20:09, IA: 8.0 Rev.1 最近(链接的校准) 打印数据 : 2023/3/4 14:20:09  
 编辑格式 : D:\W5100\DataFiles\Common\模板.sty 通过 : Administrator  
 校准文件 : D:\校准曲线\校准曲线202301.cal  
 项目 : 仪器测试

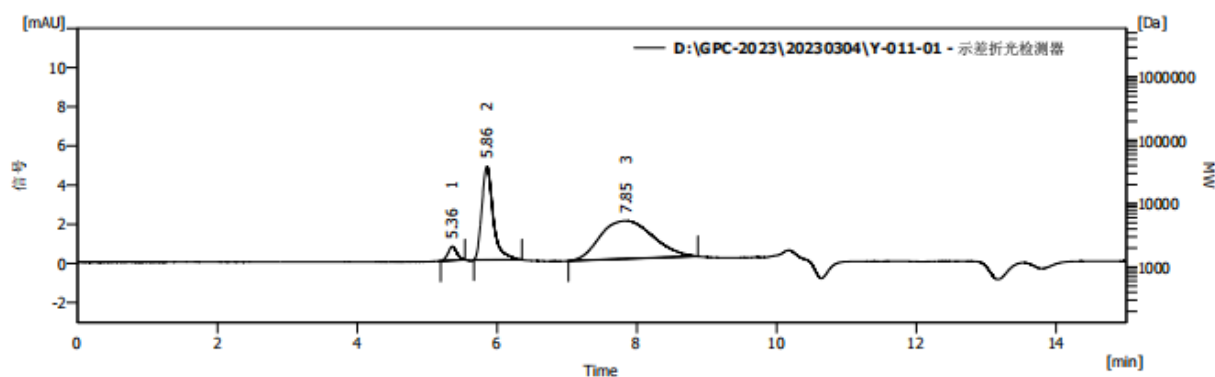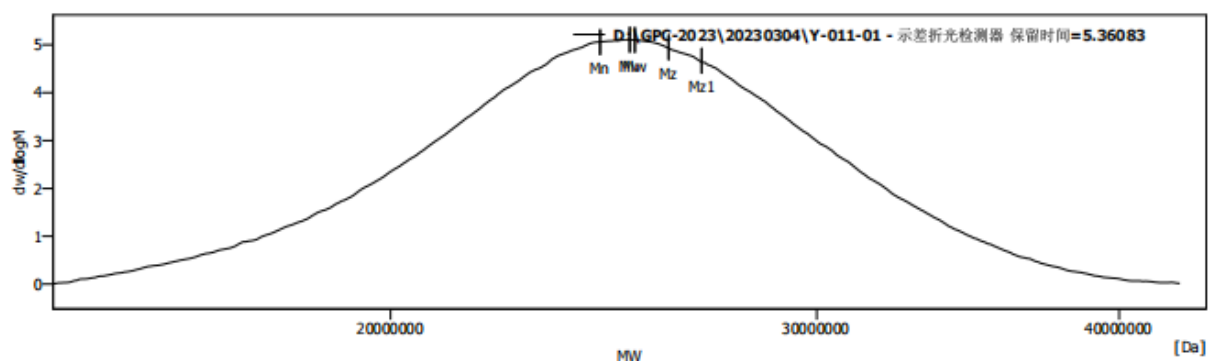

结果表(D:\校准曲线\校准曲线202301 - 通用窄峰流速修正 - D:\GPC-2023\20230304\Y-011-01 - 示差折光检测器)  
 方程式:  $Y = -0.01016 \cdot X^3 + 0.52541 \cdot X^2 - 3.96692 \cdot X + 20.87943$   
 相关因子: 0.9996180

|   | 最大保留时间 | 起始保留时间 | 结束保留时间 | 流速修正   | Mp       | Mn       | Mw       | Mz       | Mz1      | Mv       | PD     | 峰高 [mAU] | 峰高 [%] | 峰面积 [mAU.s] | 峰面积 [%] |
|---|--------|--------|--------|--------|----------|----------|----------|----------|----------|----------|--------|----------|--------|-------------|---------|
| 1 | 5.36   | 5.19   | 5.54   | 1.0000 | 25071643 | 24415428 | 25231918 | 26058272 | 26887862 | 25108991 | 1.0334 | 0.72     | 9.68   | 6.25        | 3.84    |
| 2 | 5.86   | 5.67   | 6.36   | 1.0000 | 5864403  | 5200110  | 5590861  | 5908243  | 6177246  | 5539738  | 1.0751 | 4.79     | 64.21  | 54.47       | 33.45   |
| 3 | 7.85   | 7.02   | 8.87   | 1.0000 | 75337    | 60233    | 80921    | 106217   | 133231   | 77497    | 1.3435 | 1.95     | 26.11  | 102.09      | 62.71   |

# GPC trace of P6

2024/3/8 13:59

色谱图 D:\GPC-色谱图\2024\20240308\Y-232-1.ppm

第1页/共1页

白银图微新材料科技有限公司

### 色谱图信息:

文件名 : D:\GPC-色谱图\2024\20240308\Y-232-1.ppm 建立文件 : 2024/3/8 13:41:41  
 初始 : 采集, 采集启动2024/3/8 13:26:40 采集数据 : 2024/3/8 13:41:41  
 ...原始项目 : 仪器测试 通过 : Administrator

### 打印版本信息:

打印版本 : - #2; 2024/3/8 13:59:25, IA: 8.0 Rev.1 最近(链接的校准) 打印数据 : 2024/3/8 13:59:25  
 编辑格式 : D:\W5100\DataFiles\Common\模板.sty 通过 : Administrator  
 校准文件 : D:\校准曲线\2024\校准曲线2024.03.cal  
 项目 : 仪器测试

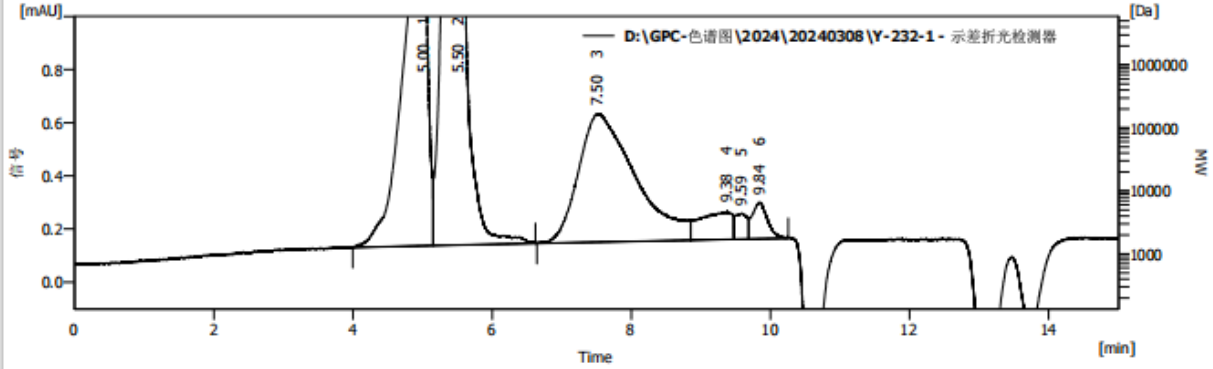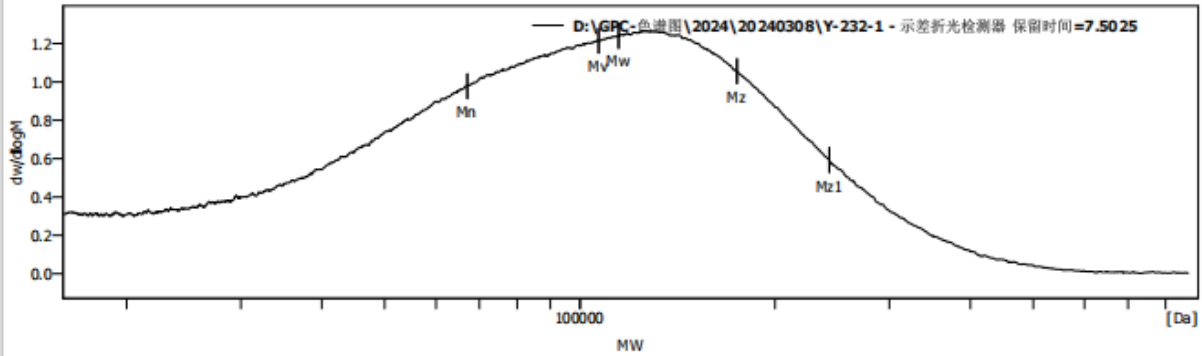

结果表(D:\校准曲线\2024\校准曲线2024.03 - 通用窄峰流速修正 - D:\GPC-色谱图\2024\20240308\Y-232-1 - 示差折光检测器)  
 方程式:  $Y = -0.00999 * X^3 + 0.32504 * X^2 - 4.0111 * X + 21.16817$   
 相关因子: 0.9996522

|   | 最大保留时间 | 起始保留时间 | 结束保留时间 | 流速修正   | Mp       | Mn        | Mw        | Mz        | Mz1        | Mv        | PD     | 峰高 [mAU] | 峰高 [%] | 峰面积 [mAU.s] | 峰面积 [%] |
|---|--------|--------|--------|--------|----------|-----------|-----------|-----------|------------|-----------|--------|----------|--------|-------------|---------|
| 1 | 5.00   | 3.99   | 5.15   | 1.0000 | 96435866 | 137121482 | 217875656 | 529876865 | 1381872968 | 196472279 | 1.5889 | 1.46     | 27.51  | 31.73       | 26.38   |
| 2 | 5.50   | 5.15   | 6.62   | 1.0000 | 19028737 | 16922192  | 22582810  | 26676910  | 30687683   | 21959248  | 1.3345 | 3.02     | 56.91  | 54.56       | 45.36   |
| 3 | 7.50   | 6.64   | 8.86   | 1.0000 | 142496   | 67049     | 114768    | 174698    | 242453     | 106887    | 1.7117 | 0.48     | 9.11   | 27.38       | 22.77   |
| 4 | 9.38   | 8.86   | 9.48   | 1.0000 | 7981     | 9991      | 10528     | 11103     | 11681      | 10444     | 1.0538 | 0.11     | 2.03   | 3.36        | 2.79    |
| 5 | 9.59   | 9.48   | 9.69   | 1.0000 | 6133     | 6198      | 6231      | 6265      | 6299       | 6226      | 1.0054 | 0.10     | 1.84   | 1.15        | 0.95    |
| 6 | 9.84   | 9.69   | 10.25  | 1.0000 | 4543     | 4394      | 4460      | 4523      | 4582       | 4451      | 1.0152 | 0.14     | 2.60   | 2.10        | 1.75    |

# GPC trace of P7

2023/3/4 13:18

色谱图 D:\GPC-2023\20230304\W-027097.prm

第1页/共1页

白银图微新材料科技有限公司

## 色谱图信息:

文件名 : D:\GPC-2023\20230304\W-027097.prm 建立文件 : 2023/3/4 13:14:50  
 初始 : 采集, 采集启动2023/3/4 12:59:49 采集数据 : 2023/3/4 13:14:50  
 ...原始项目 : 仪器测试 通过 : Administrator

## 打印版本信息:

打印版本 : - #2; 2023/3/4 13:18:45, IA: 8.0 Rev.1 最近(链接的校准) 打印数据 : 2023/3/4 13:18:45  
 编辑格式 : D:\W5100\DataFiles\Common\模板.sty 通过 : Administrator  
 校准文件 : D:\校准曲线\校准曲线202301.cal  
 项目 : 仪器测试

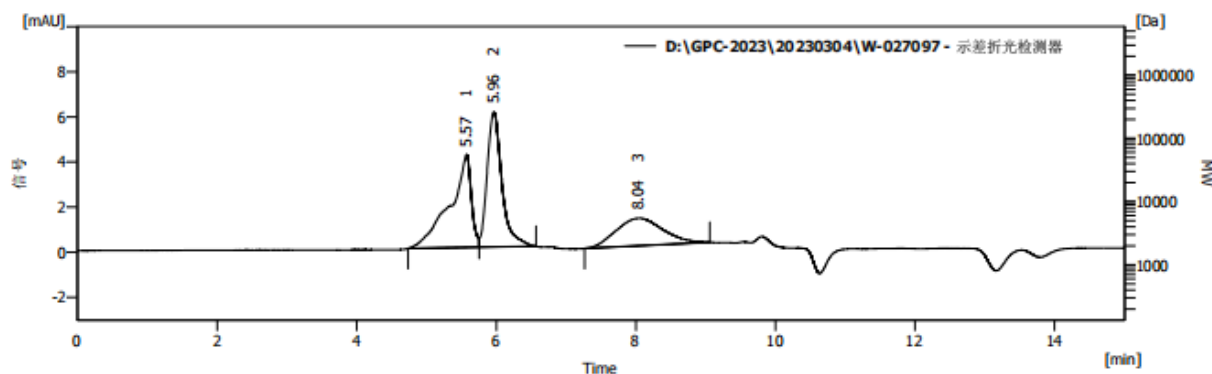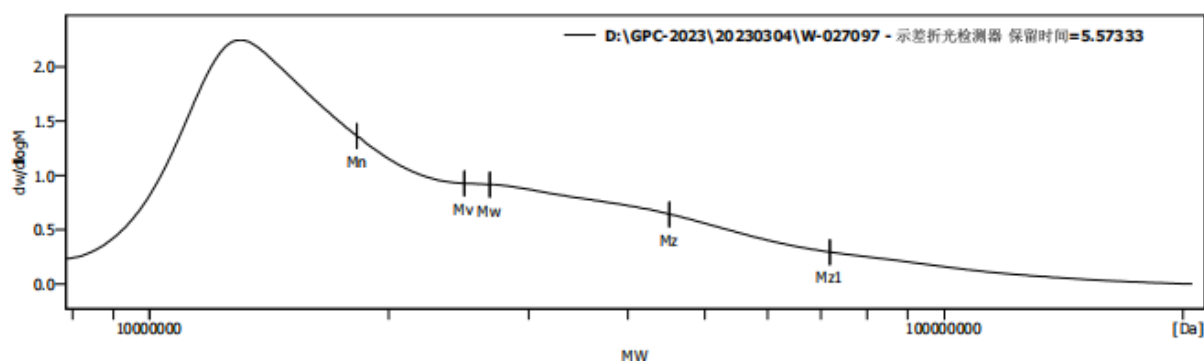

结果表(D:\校准曲线\校准曲线202301 - 通用窄峰流速修正 - D:\GPC-2023\20230304\W-027097 - 示差折光检测器)  
 方程式:  $Y = -0.01016 * X^3 + 0.32541 * X^2 - 3.96692 * X + 20.87943$   
 相关因子: 0.9996180

|   | 最大保留时间 | 起始保留时间 | 结束保留时间 | 流速修正   | Mp       | Mn       | Mw       | Mz       | Mz1      | Mv       | PD     | 峰高 [mAU] | 峰高 [%] | 峰面积 [mAU.s] | 峰面积 [%] |
|---|--------|--------|--------|--------|----------|----------|----------|----------|----------|----------|--------|----------|--------|-------------|---------|
| 1 | 5.57   | 4.73   | 5.75   | 1.0000 | 13140054 | 18244171 | 26809237 | 45131561 | 71871617 | 24913576 | 1.4695 | 4.13     | 36.37  | 88.36       | 37.70   |
| 2 | 5.96   | 5.75   | 6.57   | 1.0000 | 4343045  | 3735929  | 4156970  | 4505431  | 4807171  | 4101529  | 1.1127 | 5.99     | 52.80  | 88.44       | 37.74   |
| 3 | 8.04   | 7.27   | 9.06   | 1.0000 | 54274    | 45015    | 57291    | 71706    | 87089    | 55307    | 1.2727 | 1.23     | 10.83  | 57.56       | 24.56   |



# GPC trace of P8

2024/3/9 14:26

色谱图 D:\GPC-色谱图\2024\20240309\J-213-1.pm

第1页/共1页

白银图微新材料科技有限公司

## 色谱图信息:

文件名 : D:\GPC-色谱图\2024\20240309\J-213-1.pm 建立文件 : 2024/3/9 14:14:05  
 初始 : 采集, 采集启动2024/3/9 13:59:04 采集数据 : 2024/3/9 14:14:05  
 ...原始项目 : 仪器测试 通过 : Administrator

## 打印版本信息:

打印版本 : - #2; 2024/3/9 14:26:45, IA: 8.0 Rev.1 最近(链接的校准) 打印数据 : 2024/3/9 14:26:45  
 编辑格式 : D:\W5100\DataFiles\Common\模板.sty 通过 : Administrator  
 校准文件 : D:\校准曲线\2024\校准曲线2024.03.cal  
 项目 : 仪器测试

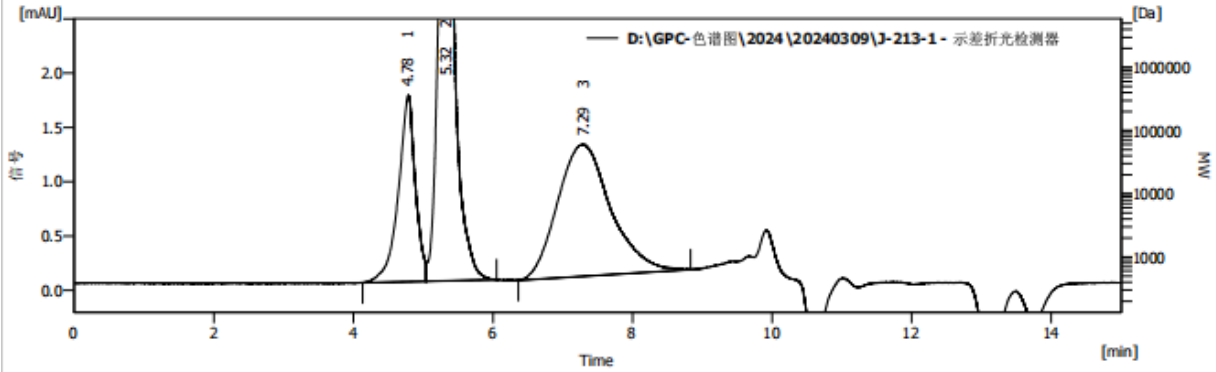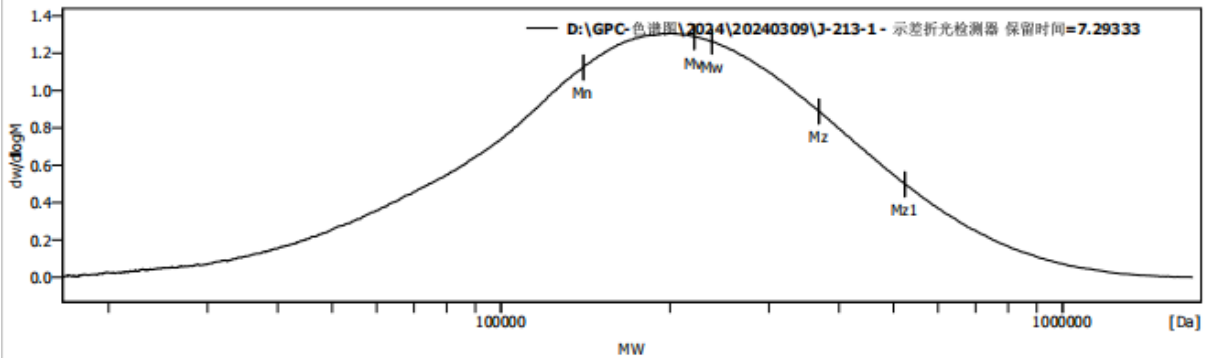

结果表(D:\校准曲线\2024\校准曲线202403 - 通用空峰流速修正 - D:\GPC-色谱图\2024\20240309\J-213-1 - 示差折光检测器)  
 方程式:  $Y = -0.00999 * X^3 + 0.32504 * X^2 - 4.0111 * X + 21.16817$   
 相关因子: 0.9996522

|   | 最大保留时间 | 起始保留时间 | 结束保留时间 | 流速修正   | Mp        | Mn        | Mw        | Mz        | Mz1       | Mv        | PD     | 峰高 [mAU] | 峰高 [%] | 峰面积 [mAU.s] | 峰面积 [%] |
|---|--------|--------|--------|--------|-----------|-----------|-----------|-----------|-----------|-----------|--------|----------|--------|-------------|---------|
| 1 | 4.78   | 4.13   | 5.04   | 1.0000 | 211160189 | 212407928 | 274060062 | 406015941 | 687278556 | 261190551 | 1.2903 | 1.72     | 19.81  | 29.17       | 16.66   |
| 2 | 5.32   | 5.04   | 6.05   | 1.0000 | 33055228  | 27902541  | 32476916  | 36586221  | 40670680  | 31856827  | 1.1639 | 5.74     | 66.18  | 81.49       | 46.55   |
| 3 | 7.29   | 6.36   | 8.83   | 1.0000 | 213702    | 140211    | 237542    | 368583    | 524044    | 221113    | 1.6942 | 1.22     | 14.01  | 64.41       | 36.79   |

# GPC trace of P9

2024/4/12 11:17

色谱图 D:\GPC-色谱图\2024\20240412\J-146-3.prm

第1页/共1页

白银图微新材料科技有限公司

## 色谱图信息:

文件名 : D:\GPC-色谱图\2024\20240412\J-146-3.prm 建立文件 : 2024/4/12 11:01:15  
 初始 : 采集, 采集启动2024/4/12 10:46:14 采集数据 : 2024/4/12 11:01:14  
 ...原始项目 : 仪器测试 通过 : Administrator

## 打印版本信息:

打印版本 : - #2; 2024/4/12 11:17:36, IA: 8.0 Rev.1 最近(链接的)校准 打印数据 : 2024/4/12 11:17:36  
 编辑格式 : D:\V5100\DataFiles\Common\模板.sty 通过 : Administrator  
 校准文件 : D:\校准曲线\2024\校准曲线2024.03.cal  
 项目 : 仪器测试

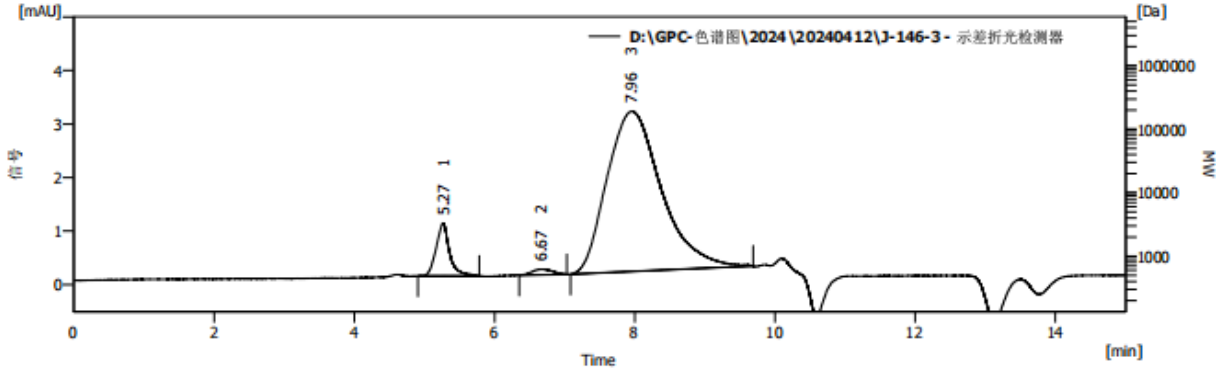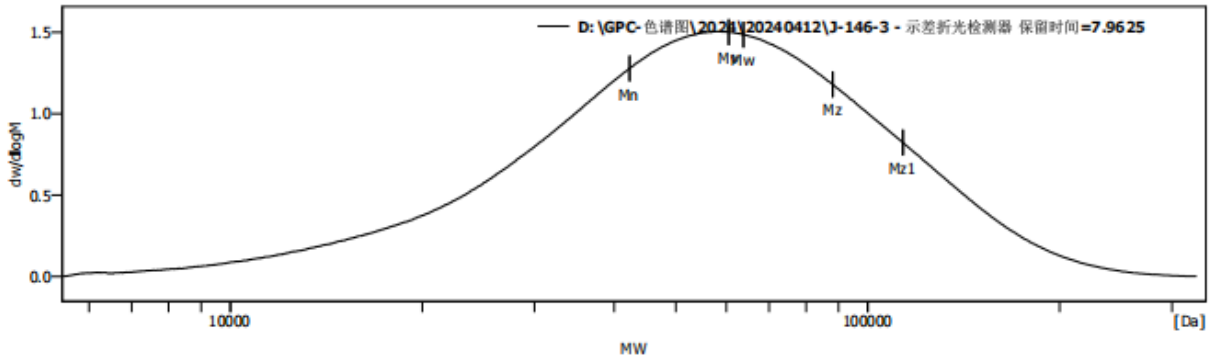

结果表(D:\校准曲线\2024\校准曲线202403 - 通用窄峰流速修正 - D:\GPC-色谱图\2024\20240412\J-146-3 - 示差折光检测器)  
 方程式:  $Y = -0.009999X^3 + 0.32504X^2 - 4.0111X + 21.16817$   
 相关因子: 0.9996522

|   | 最大保留时间 | 起始保留时间 | 结束保留时间 | 流速修正   | Mp       | Mn       | Mw       | Mz       | Mz1      | Mv       | PD     | 峰高 (mAU) | 峰高 (%) | 峰面积 (mAU.s) | 峰面积 (%) |
|---|--------|--------|--------|--------|----------|----------|----------|----------|----------|----------|--------|----------|--------|-------------|---------|
| 1 | 5.27   | 4.91   | 5.78   | 1.0000 | 39832628 | 35715451 | 40964198 | 45757751 | 50597919 | 40242957 | 1.1470 | 0.99     | 24.20  | 13.15       | 7.42    |
| 2 | 6.67   | 6.35   | 7.03   | 1.0000 | 811410   | 745745   | 813064   | 885748   | 961247   | 802572   | 1.0903 | 0.11     | 2.62   | 2.18        | 1.23    |
| 3 | 7.96   | 7.08   | 9.69   | 1.0000 | 62637    | 42308    | 63859    | 88134    | 113588   | 60532    | 1.5094 | 3.00     | 73.18  | 161.74      | 91.34   |

# GPC trace of P10

2024/4/12 15:53

色谱图 D:\GPC-色谱图\2024\20240412\Y-0265-2.prm

第1页/共1页

## 白银图微新材料科技有限公司

### 色谱图信息:

文件名 : D:\GPC-色谱图\2024\20240412\Y-0265-2.prm 建立文件 : 2024/4/12 15:21:56  
 初始 : 采集, 采集启动2024/4/12 15:06:56 采集数据 : 2024/4/12 15:21:56  
 ...原始项目 : 仪器测试 通过 : Administrator

### 打印版本信息:

打印版本 : - #2; 2024/4/12 15:53:00, IA: 8.0 Rev.1 最近(链接的校准) 打印数据 : 2024/4/12 15:53:00  
 编辑格式 : D:\V5100\DataFiles\Common\模板.sty 通过 : Administrator  
 校准文件 : D:\校准曲线\2024\校准曲线2024.03.cal  
 项目 : 仪器测试

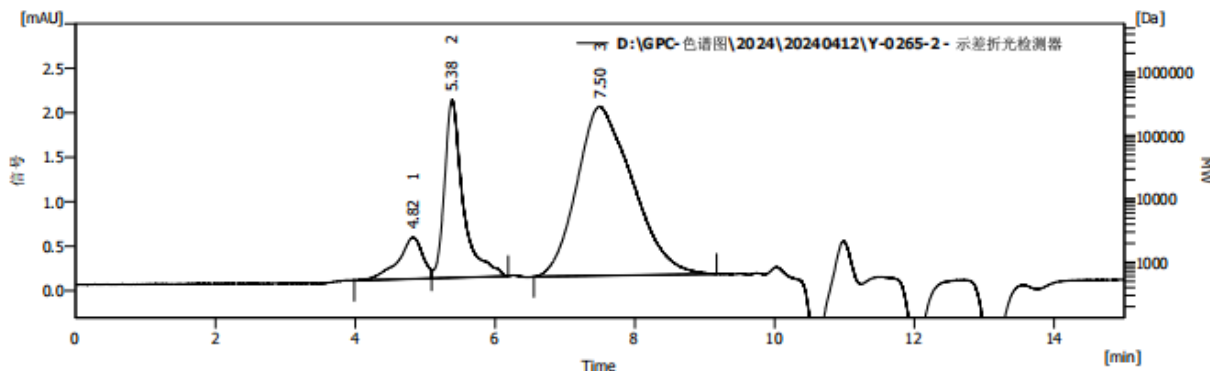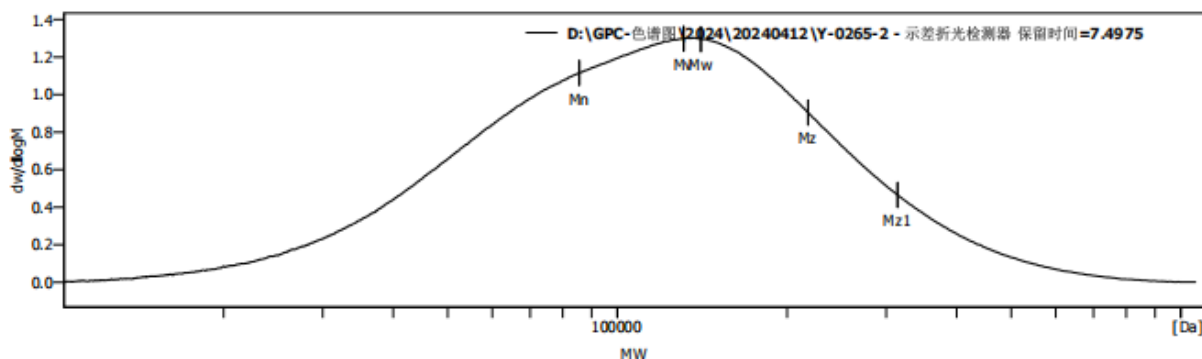

结果表(D:\校准曲线\2024\校准曲线2024.03 - 通用窄峰流速修正 - D:\GPC-色谱图\2024\20240412\Y-0265-2 - 示差折光检测器)  
 方程式:  $Y = -0.00999 * X^3 + 0.32504 * X^2 - 4.0111 * X + 21.16817$   
 相关因子: 0.9996522

|   | 最大保留时间 | 起始保留时间 | 结束保留时间 | 流速修正   | Mp        | Mn        | Mw        | Mz        | Mz1        | Mv        | PD     | 峰高 (mAU) | 峰高 (%) | 峰面积 (mAU.s) | 峰面积 (%) |
|---|--------|--------|--------|--------|-----------|-----------|-----------|-----------|------------|-----------|--------|----------|--------|-------------|---------|
| 1 | 4.82   | 3.98   | 5.09   | 1.0000 | 184790135 | 192957708 | 325647971 | 739384792 | 1592047185 | 292417143 | 1.6877 | 0.47     | 10.72  | 11.46       | 7.45    |
| 2 | 5.38   | 5.09   | 6.19   | 1.0000 | 27573145  | 17871547  | 24568663  | 29774278  | 34246399   | 23737332  | 1.3747 | 2.01     | 45.80  | 37.03       | 24.07   |
| 3 | 7.50   | 6.56   | 9.17   | 1.0000 | 143848    | 85603     | 140675    | 218070    | 314463     | 131149    | 1.6433 | 1.90     | 43.48  | 105.38      | 68.48   |

# GPC trace of P11

2024/4/12 11:50

色谱图 D:\GPC-色谱图\2024\20240412\J-146-4.prm

第1页/共1页

白银图微新材料科技有限公司

## 色谱图信息:

文件名 : D:\GPC-色谱图\2024\20240412\J-146-4.prm 建立文件 : 2024/4/12 11:33:09  
 初始 : 采集, 采集自动2024/4/12 11:18:09 采集数据 : 2024/4/12 11:33:09  
 ...原始项目 : 仪器测试 通过 : Administrator

## 打印版本信息:

打印版本 : - #2; 2024/4/12 11:50:20, IA: 8.0 Rev.1 最近(链接的校准) 打印数据 : 2024/4/12 11:50:20  
 编辑格式 : D:\W5100\DataFiles\Common\模板.sty 通过 : Administrator  
 校准文件 : D:\校准曲线\2024\校准曲线2024.03.cal  
 项目 : 仪器测试

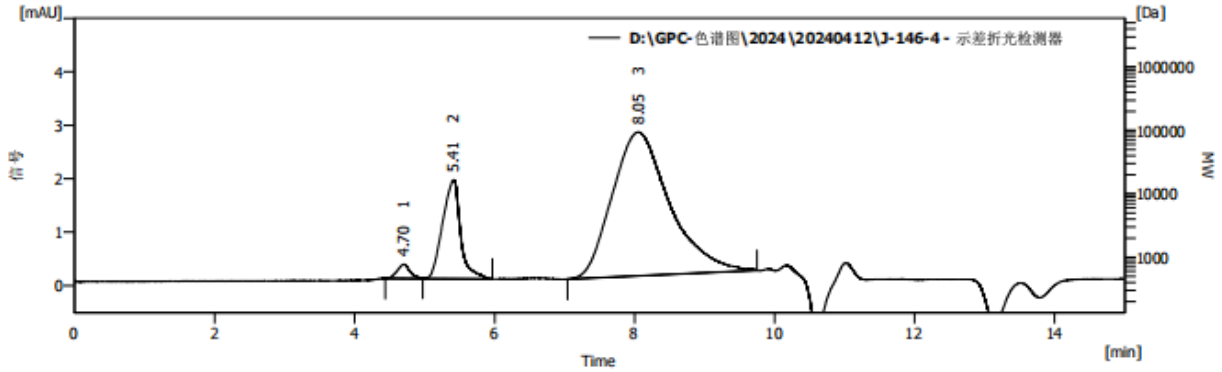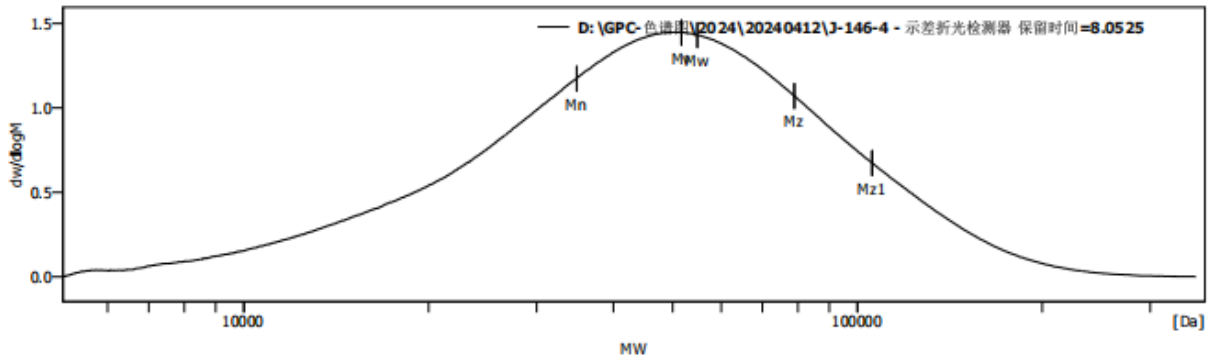

结果表(D:\校准曲线\2024\校准曲线202403 - 通用窄峰流速修正 - D:\GPC-色谱图\2024\20240412\J-146-4 - 示差折光检测器)  
 方程式:  $Y = -0.00999 * X^3 + 0.32504 * X^2 - 4.0111 * X + 21.16817$   
 相关因子: 0.9996522

|   | 最大保留时间 | 起始保留时间 | 结束保留时间 | 流速修正   | Mp        | Mn        | Mw        | Mz        | Mz1       | Mv        | PD     | 峰高 [mAU] | 峰高 (%) | 峰面积 [mAU.s] | 峰面积 (%) |
|---|--------|--------|--------|--------|-----------|-----------|-----------|-----------|-----------|-----------|--------|----------|--------|-------------|---------|
| 1 | 4.70   | 4.44   | 4.97   | 1.0000 | 284484574 | 266751670 | 299031655 | 333176071 | 368951956 | 294104306 | 1.1210 | 0.27     | 5.57   | 3.43        | 1.81    |
| 2 | 5.41   | 4.97   | 5.97   | 1.0000 | 24876779  | 24170745  | 29066437  | 34137444  | 39643699  | 28343982  | 1.2025 | 1.85     | 38.51  | 32.97       | 17.35   |
| 3 | 8.05   | 7.04   | 9.75   | 1.0000 | 53883     | 34883     | 54877     | 78918     | 105684    | 51687     | 1.5732 | 2.69     | 55.92  | 153.63      | 80.84   |

# GPC trace of P12

## 白银图微新材料科技有限公司

### 色谱图信息:

文件名 : D:\GPC-色谱图\2024\20240412\Y-0265-3.prm 建立文件 : 2024/4/12 15:57:13  
 初始 : 采集, 采集启动2024/4/12 15:42:12 采集数据 : 2024/4/12 15:57:13  
 ...原始项目 : 仪器测试 通过 : Administrator

### 打印版本信息:

打印版本 : - #2; 2024/4/12 16:13:17, IA: 8.0 Rev.1 最近(链接的校准) 打印数据 : 2024/4/12 16:13:17  
 编辑格式 : D:\W5100\DataFiles\Common\模板.sty 通过 : Administrator  
 校准文件 : D:\校准曲线\2024\校准曲线2024.03.cal  
 项目 : 仪器测试

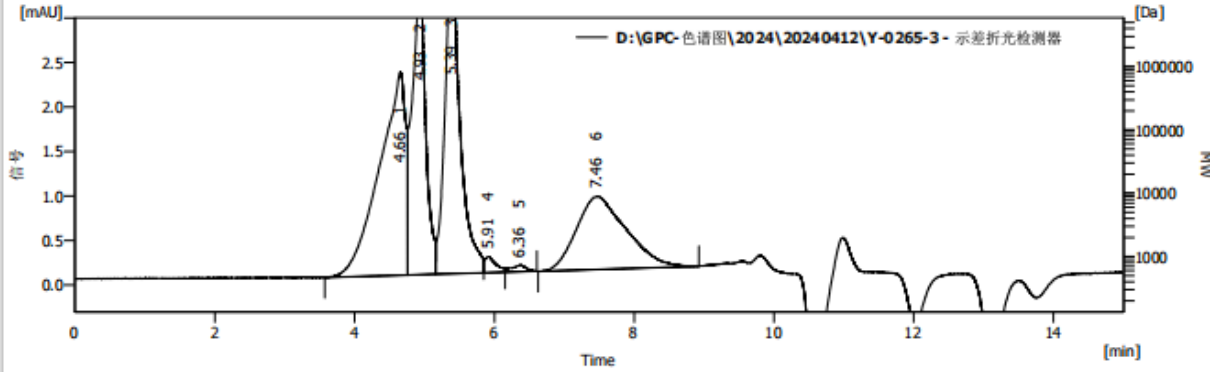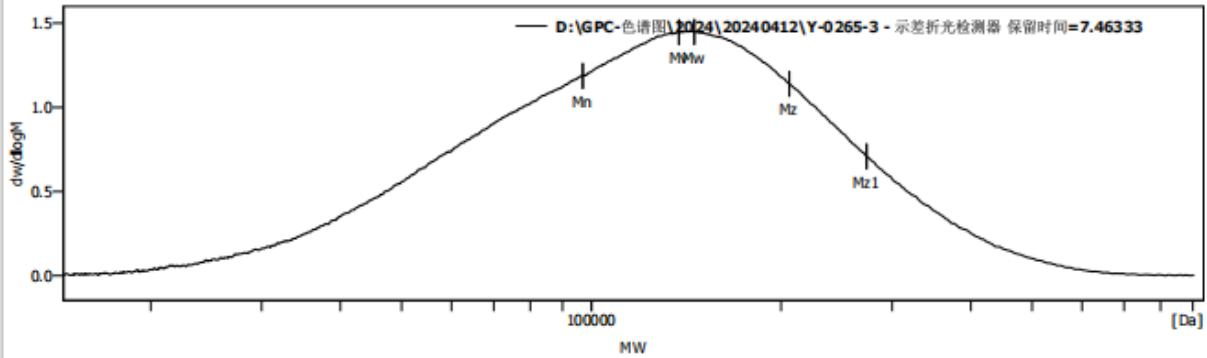

结果表(D:\校准曲线\2024\校准曲线2024.03 - 通用窄峰流速修正 - D:\GPC-色谱图\2024\20240412\Y-0265-3 - 示差折光检测器)  
 方程式:  $Y = -0.00999X^3 + 0.32504X^2 - 4.0111X + 21.16817$   
 相关因子: 0.9996522

|   | 最大保留时间 | 起始保留时间 | 结束保留时间 | 流速修正   | Mp        | Mn        | Mw         | Mz         | Mz1        | Mv        | PD     | 峰高 (mAU) | 峰高 (%) | 峰面积 (mAU.s) | 峰面积 (%) |
|---|--------|--------|--------|--------|-----------|-----------|------------|------------|------------|-----------|--------|----------|--------|-------------|---------|
| 1 | 4.66   | 3.57   | 4.76   | 1.0000 | 340884634 | 532038440 | 1050420993 | 3141574911 | 8346277982 | 908017925 | 1.9743 | 2.29     | 22.09  | 59.45       | 29.41   |
| 2 | 4.93   | 4.76   | 5.16   | 1.0000 | 123943885 | 121095676 | 133750636  | 146416328  | 158406886  | 131857955 | 1.1045 | 3.33     | 32.14  | 44.29       | 21.91   |
| 3 | 5.39   | 5.16   | 5.85   | 1.0000 | 26995447  | 21952395  | 25684566   | 29021981   | 32073279   | 25170747  | 1.1700 | 3.67     | 35.39  | 54.62       | 27.02   |
| 4 | 5.91   | 5.85   | 6.15   | 1.0000 | 5641015   | 4776588   | 5004729    | 5214007    | 5399009    | 4972115   | 1.0478 | 0.18     | 1.74   | 2.04        | 1.01    |
| 5 | 6.36   | 6.15   | 6.61   | 1.0000 | 1741979   | 1762384   | 1874956    | 1992246    | 2108487    | 1857673   | 1.0639 | 0.07     | 0.72   | 1.11        | 0.55    |
| 6 | 7.46   | 6.62   | 8.92   | 1.0000 | 153488    | 96940     | 145779     | 206186     | 273400     | 137780    | 1.5038 | 0.82     | 7.93   | 40.64       | 20.10   |

# GPC trace of P13

2024/4/11 16:34

色谱图 D:\GPC-色谱图\2024\20240411\L-1133-3.pcm

第1页/共1页

白银图微新材料科技有限公司

## 色谱图信息:

文件名 : D:\GPC-色谱图\2024\20240411\L-1133-3.pcm 建立文件 : 2024/4/11 16:17:59  
 初始 : 采集, 采集自动2024/4/11 16:02:59 采集数据 : 2024/4/11 16:17:59  
 ...原始项目 : 仪器测试 通过 : Administrator

## 打印版本信息:

打印版本 : - #2; 2024/4/11 16:34:06, IA: 8.0 Rev.1 最近(链接的校准) 打印数据 : 2024/4/11 16:34:06  
 编辑格式 : D:\W5100\DataFiles\Common\模板.sty 通过 : Administrator  
 校准文件 : D:\校准曲线\2024\校准曲线2024 03.cal  
 项目 : 仪器测试

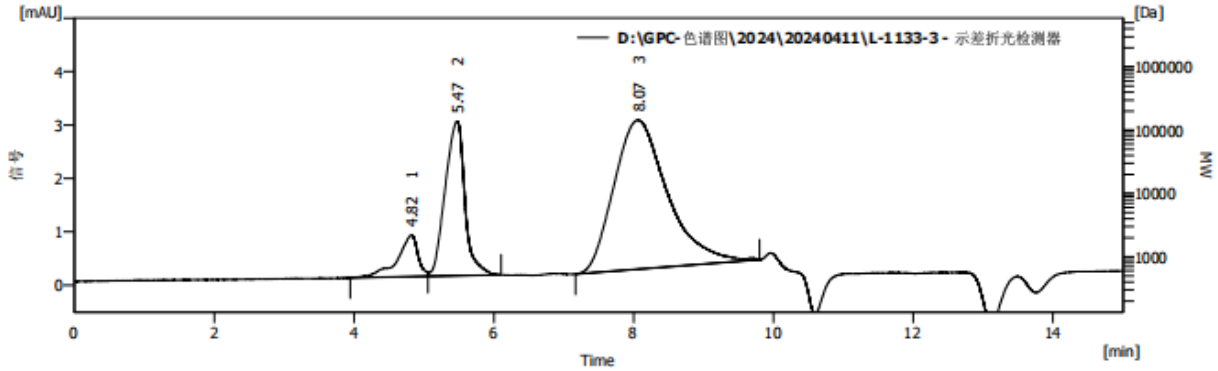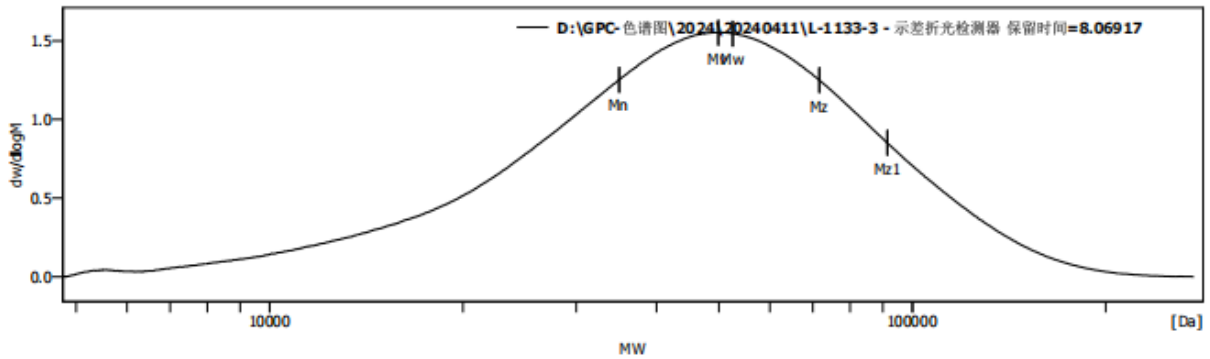

结果表(D:\校准曲线\2024\校准曲线202403 - 通用窄峰流速修正. - D:\GPC-色谱图\2024\20240411\L-1133-3 - 示差折光检测器)  
 方程式:  $Y = -0.0099999X^3 + 0.32504X^2 - 4.0111X + 21.16817$   
 相关因子: 0.9996522

|   | 最大保留时间 | 起始保留时间 | 结束保留时间 | 流速修正   | Mp        | Mn        | Mw        | Mz        | Mz1        | Mv        | PD     | 峰高 [mAU] | 峰高 [%] | 峰面积 [mAU.s] | 峰面积 [%] |
|---|--------|--------|--------|--------|-----------|-----------|-----------|-----------|------------|-----------|--------|----------|--------|-------------|---------|
| 1 | 4.82   | 3.94   | 5.06   | 1.0000 | 182572873 | 222290275 | 369422395 | 884821334 | 1977046680 | 330498744 | 1.6619 | 0.78     | 12.07  | 15.91       | 7.18    |
| 2 | 5.47   | 5.06   | 6.10   | 1.0000 | 20615222  | 20067611  | 24401172  | 29115940  | 34338465   | 23742664  | 1.2159 | 2.90     | 44.74  | 56.71       | 25.58   |
| 3 | 8.07   | 7.17   | 9.80   | 1.0000 | 52420     | 35004     | 52572     | 71686     | 91467      | 49916     | 1.5019 | 2.79     | 43.19  | 149.06      | 67.24   |

# GPC trace of P14

2024/4/18 14:52

色谱图 D:\GPC-色谱图\2024\20240418\L-1135-6.ppm

第1页/共1页

白银图微新材料科技有限公司

## 色谱图信息:

文件名 : D:\GPC-色谱图\2024\20240418\L-1135-6.ppm 建立文件 : 2024/4/18 14:35:34  
 初始 : 采集, 采集启动2024/4/18 14:20:33 采集数据 : 2024/4/18 14:35:33  
 ...原始项目 : 仪器测试 通过 : Administrator

## 打印版本信息:

打印版本 : - #2; 2024/4/18 14:52:54, IA: 8.0 Rev.1 最近(链接的校准) 打印数据 : 2024/4/18 14:52:54  
 编辑格式 : D:\W5100\DataFiles\Common\模板.sty 通过 : Administrator  
 校准文件 : D:\校准曲线\2024\校准曲线2024.03.cal  
 项目 : 仪器测试

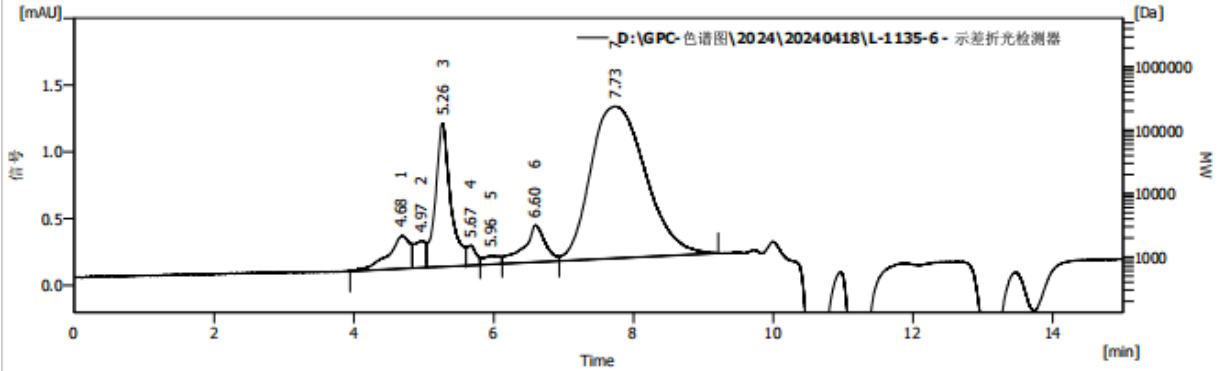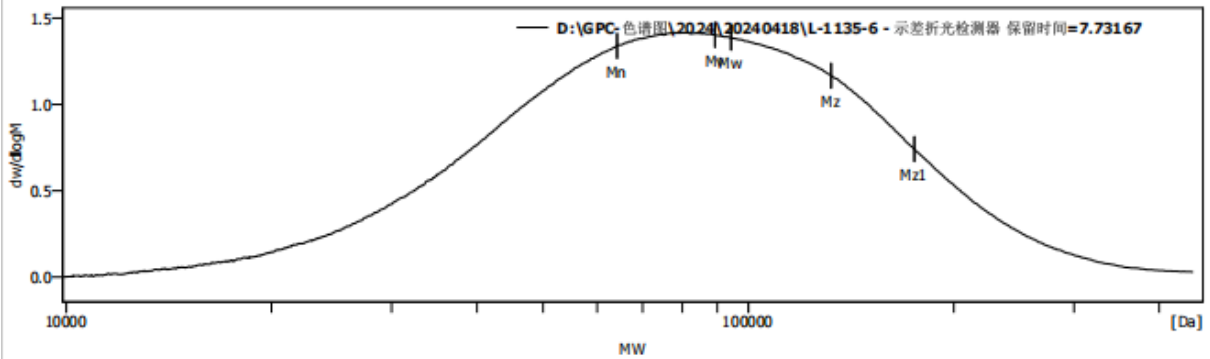

结果表(D:\校准曲线\2024\校准曲线2024.03 - 通用窄峰流速修正 - D:\GPC-色谱图\2024\20240418\L-1135-6 - 示差折光检测器)  
 方程式:  $Y = -0.009999X^3 + 0.325049X^2 - 4.0111X + 21.16817$   
 相关因子: 0.9996522

|   | 最大保留时间 | 起始保留时间 | 结束保留时间 | 流速修正   | Mp        | Mn        | Mw        | Mz         | Mz1        | Mv        | PD     | 峰高 (mAU) | 峰高 (%) | 峰面积 (mAU.s) | 峰面积 (%) |
|---|--------|--------|--------|--------|-----------|-----------|-----------|------------|------------|-----------|--------|----------|--------|-------------|---------|
| 1 | 4.68   | 3.94   | 4.84   | 1.0000 | 308434827 | 357448663 | 577184015 | 1247738647 | 2473175574 | 521391809 | 1.6147 | 0.25     | 7.80   | 5.31        | 5.62    |
| 2 | 4.97   | 4.84   | 5.04   | 1.0000 | 108635442 | 118499111 | 123583610 | 128835127  | 133999705  | 122804450 | 1.0429 | 0.20     | 6.39   | 2.34        | 2.47    |
| 3 | 5.26   | 5.04   | 5.60   | 1.0000 | 40050062  | 34219521  | 39397086  | 44619516   | 49766251   | 38627270  | 1.1513 | 1.07     | 34.04  | 16.04       | 16.96   |
| 4 | 5.67   | 5.60   | 5.80   | 1.0000 | 11485062  | 10641487  | 10912112  | 11174645   | 11423377   | 10872172  | 1.0254 | 0.15     | 4.73   | 1.40        | 1.48    |
| 5 | 5.96   | 5.80   | 6.12   | 1.0000 | 5000313   | 4731123   | 5017986   | 5318844    | 5614623    | 4973623   | 1.0606 | 0.07     | 2.14   | 1.09        | 1.15    |
| 6 | 6.60   | 6.12   | 6.93   | 1.0000 | 969039    | 978000    | 1177281   | 1461714    | 1802285    | 1141118   | 1.2038 | 0.28     | 8.81   | 5.96        | 6.30    |

# GPC trace of P15

2024/4/18 15:25

色谱图 D:\GPC-色谱图\2024\20240418\L-1135-7.ppm

第1页/共1页

## 白银图微新材料科技有限公司

### 色谱图信息:

文件名 : D:\GPC-色谱图\2024\20240418\L-1135-7.ppm 建立文件 : 2024/4/18 15:06:38  
 初始 : 采集, 采集启动2024/4/18 14:51:38 采集数据 : 2024/4/18 15:06:38  
 ...原始项目 : 仪器测试 通过 : Administrator

### 打印版本信息:

打印版本 : - #2; 2024/4/18 15:25:28, IA: 8.0 Rev.1 最近(链接的校准) 打印数据 : 2024/4/18 15:25:28  
 编辑格式 : D:\W5100\DataFiles\Common\模板.sty 通过 : Administrator  
 校准文件 : D:\校准曲线\2024\校准曲线2024.03.cal  
 项目 : 仪器测试

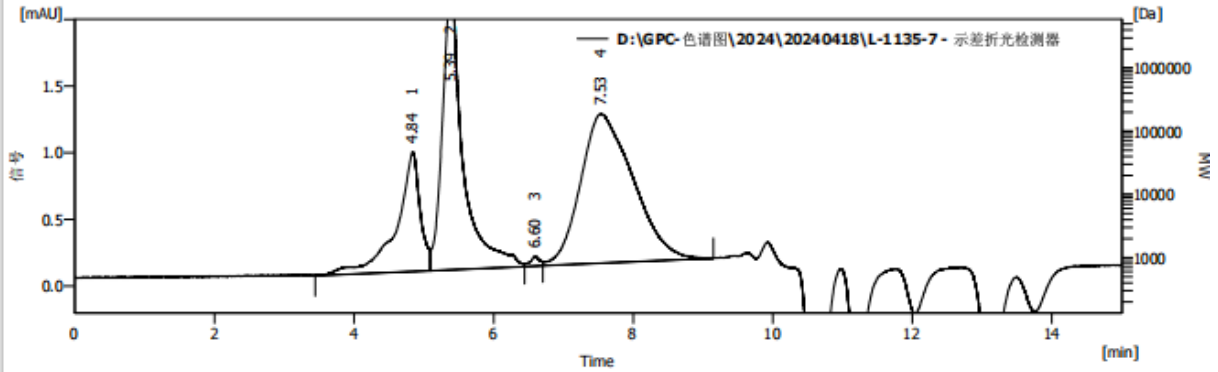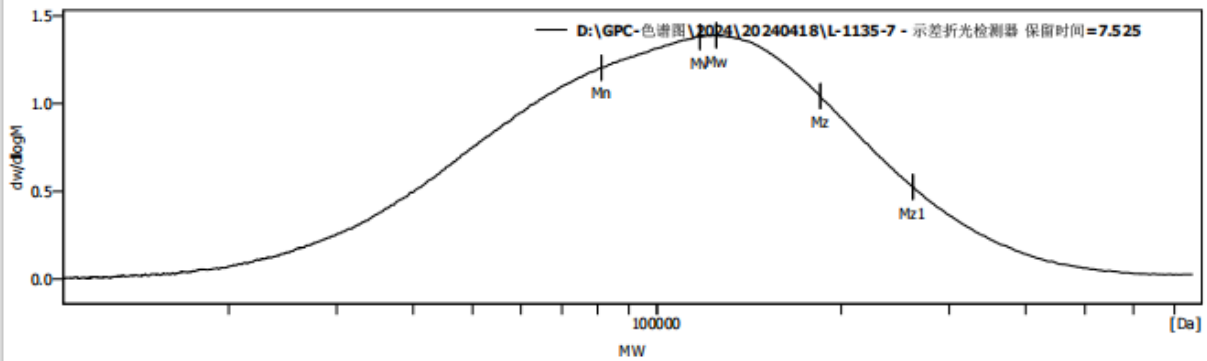

结果表(D:\校准曲线\2024\校准曲线2024.03 - 通用空峰流速修正 - D:\GPC-色谱图\2024\20240418\L-1135-7 - 示差折光检测器)  
 方程式:  $Y = -0.00999 \times X^3 + 0.32504 \times X^2 - 4.0111 \times X + 21.16817$   
 相关因子: 0.9996522

|   | 最大保留时间 | 起始保留时间 | 结束保留时间 | 流速修正   | Mp        | Mn        | Mw        | Mz         | Mz1        | Mv        | PD     | 峰高 (mAU) | 峰高 (%) | 峰面积 (mAU.s) | 峰面积 (%) |
|---|--------|--------|--------|--------|-----------|-----------|-----------|------------|------------|-----------|--------|----------|--------|-------------|---------|
| 1 | 4.84   | 3.44   | 5.09   | 1.0000 | 171903104 | 212698670 | 866813906 | 1009099117 | 2540704835 | 576161476 | 4.0753 | 0.90     | 21.09  | 21.28       | 17.15   |
| 2 | 5.39   | 5.09   | 6.44   | 1.0000 | 26853065  | 13719286  | 23983927  | 30841912   | 36130175   | 22834770  | 1.7482 | 2.17     | 50.89  | 43.44       | 35.00   |
| 3 | 6.60   | 6.44   | 6.71   | 1.0000 | 970949    | 981675    | 1004800   | 1029462    | 1055297    | 1001204   | 1.0236 | 0.08     | 1.76   | 0.69        | 0.56    |
| 4 | 7.53   | 6.71   | 9.15   | 1.0000 | 136585    | 81247     | 125062    | 184929     | 261912     | 117607    | 1.5393 | 1.12     | 26.27  | 58.70       | 47.29   |



# GPC trace of P16

2024/4/18 15:58

色谱图 D:\GPC-色谱图\2024\20240418\L-1135-8.ppm

第1页/共1页

白银图微新材料科技有限公司

## 色谱图信息:

文件名 : D:\GPC-色谱图\2024\20240418\L-1135-8.ppm 建立文件 : 2024/4/18 15:38:37  
 初始 : 采集, 采集启动2024/4/18 15:23:37 采集数据 : 2024/4/18 15:38:37  
 ...原始项目 : 仪器测试 通过 : Administrator

## 打印版本信息:

打印版本 : - #2; 2024/4/18 15:58:08, IA: 8.0 Rev.1 最近(链接的校准) 打印数据 : 2024/4/18 15:58:08  
 编辑格式 : D:\W5100\DataFiles\Common\模板.sty 通过 : Administrator  
 校准文件 : D:\校准曲线\2024\校准曲线2024.03.cal  
 项目 : 仪器测试

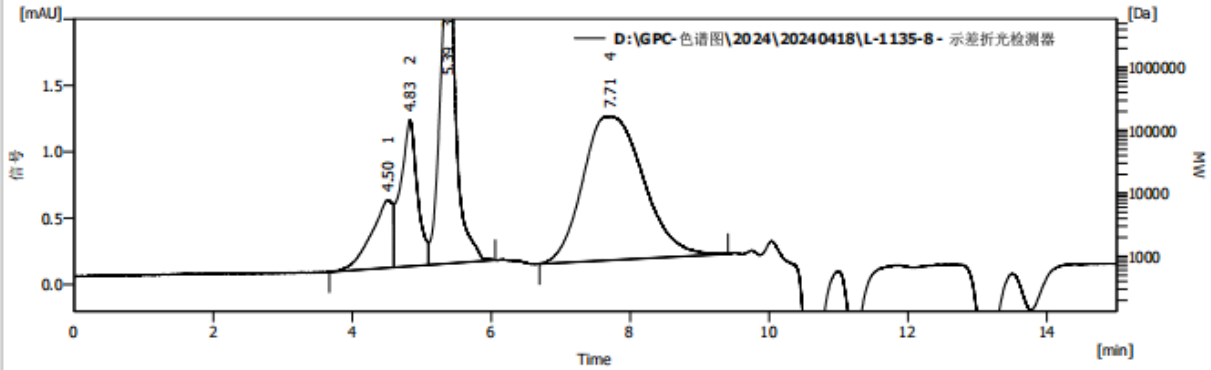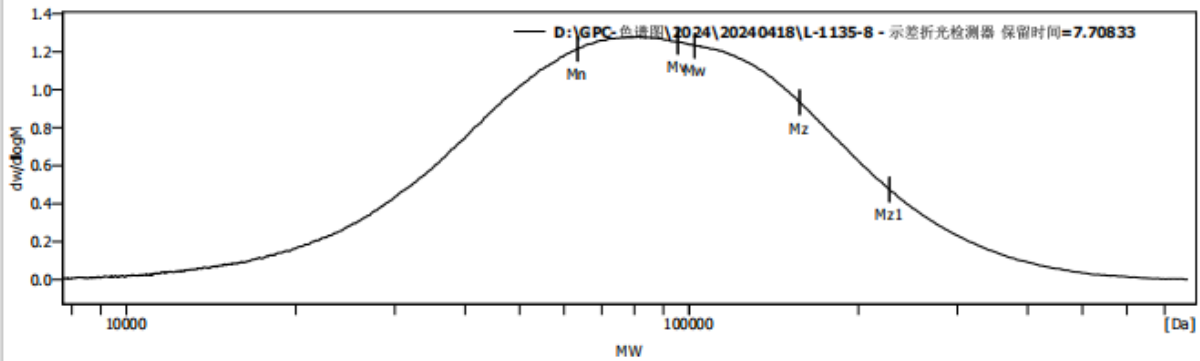

结果表(D:\校准曲线\2024\校准曲线2024.03 - 通用空峰流速修正. - D:\GPC-色谱图\2024\20240418\L-1135-8 - 示差折光检测器)  
 方程式:  $Y = -0.009999 \times X^3 + 0.32504 \times X^2 - 4.0111 \times X + 21.16817$   
 相关因子: 0.9996522

|   | 最大保留时间 | 起始保留时间 | 结束保留时间 | 流速修正   | Mp        | Mn        | Mw         | Mz         | Mz1        | Mv         | PD     | 峰高 (mAU) | 峰高 (%) | 峰面积 (mAU.s) | 峰面积 (%) |
|---|--------|--------|--------|--------|-----------|-----------|------------|------------|------------|------------|--------|----------|--------|-------------|---------|
| 1 | 4.50   | 3.67   | 4.60   | 1.0000 | 607211044 | 844274440 | 1332322882 | 2845359439 | 6269401235 | 1210708458 | 1.5781 | 0.51     | 9.59   | 10.99       | 8.16    |
| 2 | 4.83   | 4.60   | 5.10   | 1.0000 | 176620034 | 170628229 | 202479043  | 236899623  | 270145183  | 197504807  | 1.1867 | 1.10     | 20.62  | 18.68       | 13.87   |
| 3 | 5.39   | 5.10   | 6.06   | 1.0000 | 26711489  | 23936033  | 28274337   | 32227448   | 36162525   | 27681832   | 1.1812 | 2.65     | 49.51  | 39.06       | 29.01   |
| 4 | 7.71   | 6.69   | 9.41   | 1.0000 | 97537     | 63437     | 102305     | 157394     | 227239     | 95560      | 1.6127 | 1.09     | 20.28  | 65.93       | 48.96   |

# GPC trace of P17

2024/4/15 12:43

色谱图 D:\GPC-色谱图\2024\0240415\LN-1135-4

第1页/共1页

## 白银图微新材料科技有限公司

### 色谱图信息:

文件名 : D:\GPC-色谱图\2024\0240415\LN-1135-4.prm 建立文件 : 2024/4/15 12:23:33  
 初始 : 采集, 采集启动2024/4/15 12:08:33 采集数据 : 2024/4/15 12:23:33  
 ...原始项目 : 仪器测试 通过 : Administrator

### 打印版本信息:

打印版本 : - #2; 2024/4/15 12:43:25, IA: 8.0 Rev.1 最近(链接的校准) 打印数据 : 2024/4/15 12:43:25  
 编辑格式 : D:\W5100\DataFiles\Common\模板.sty 通过 : Administrator  
 校准文件 : D:\校准曲线\2024\校准曲线2024.03.cal  
 项目 : 仪器测试

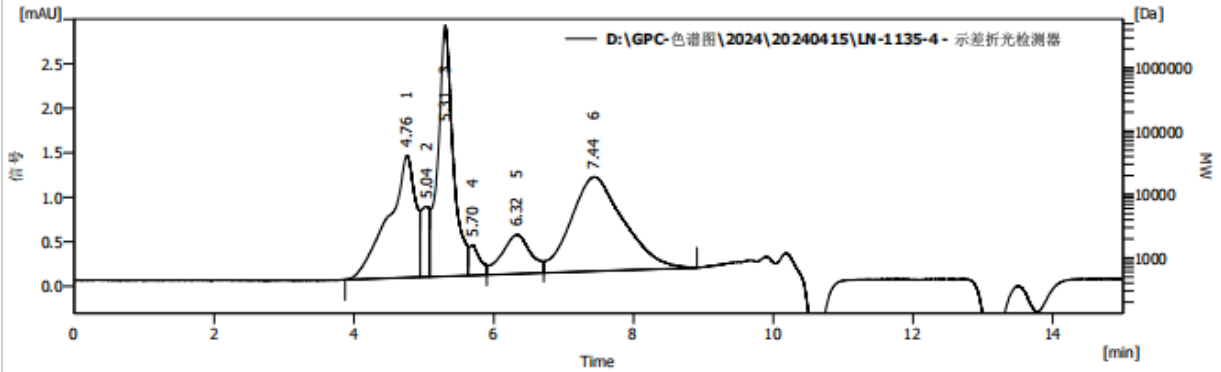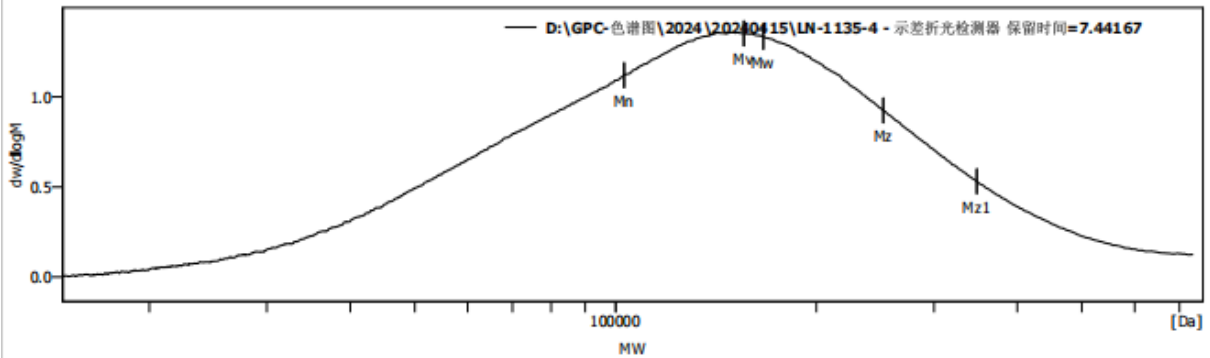

结果表(D:\校准曲线\2024\校准曲线2024.03 - 通用窄峰流速修正 - D:\GPC-色谱图\2024\0240415\LN-1135-4 - 示差折光检测器)  
 方程式:  $Y = -0.0099999 \times X^3 + 0.32504 \times X^2 - 4.0111 \times X + 21.16817$   
 相关因子: 0.9996522

|   | 最大保留时间 | 起始保留时间 | 结束保留时间 | 流速修正   | Mp        | Mn        | Mw        | Mz         | Mz1        | Mv        | PD     | 峰高 (mAU) | 峰高 (%) | 峰面积 (mAU.s) | 峰面积 (%) |
|---|--------|--------|--------|--------|-----------|-----------|-----------|------------|------------|-----------|--------|----------|--------|-------------|---------|
| 1 | 4.76   | 3.87   | 4.95   | 1.0000 | 232124985 | 294188908 | 569886499 | 1352827082 | 2557345184 | 500725330 | 1.9371 | 1.38     | 20.13  | 36.78       | 23.24   |
| 2 | 5.04   | 4.95   | 5.08   | 1.0000 | 85933298  | 92213044  | 93930514  | 95670437   | 97395034   | 93670623  | 1.0186 | 0.79     | 11.60  | 6.36        | 4.02    |
| 3 | 5.31   | 5.08   | 5.63   | 1.0000 | 35070863  | 30894236  | 35996392  | 40435937   | 45215345   | 34887905  | 1.1522 | 2.82     | 41.26  | 42.94       | 27.13   |
| 4 | 5.70   | 5.63   | 5.90   | 1.0000 | 10535494  | 9030246   | 9412794   | 9772025    | 10097000   | 9357337   | 1.0424 | 0.35     | 5.05   | 3.77        | 2.38    |
| 5 | 6.32   | 5.90   | 6.71   | 1.0000 | 1906577   | 1694974   | 2119102   | 2660777    | 3253126    | 2046729   | 1.2502 | 0.44     | 6.45   | 12.58       | 7.95    |
| 6 | 7.44   | 6.71   | 8.91   | 1.0000 | 159979    | 103019    | 166579    | 252008     | 347800     | 155717    | 1.6170 | 1.06     | 15.51  | 55.84       | 35.28   |

# GPC trace of P18

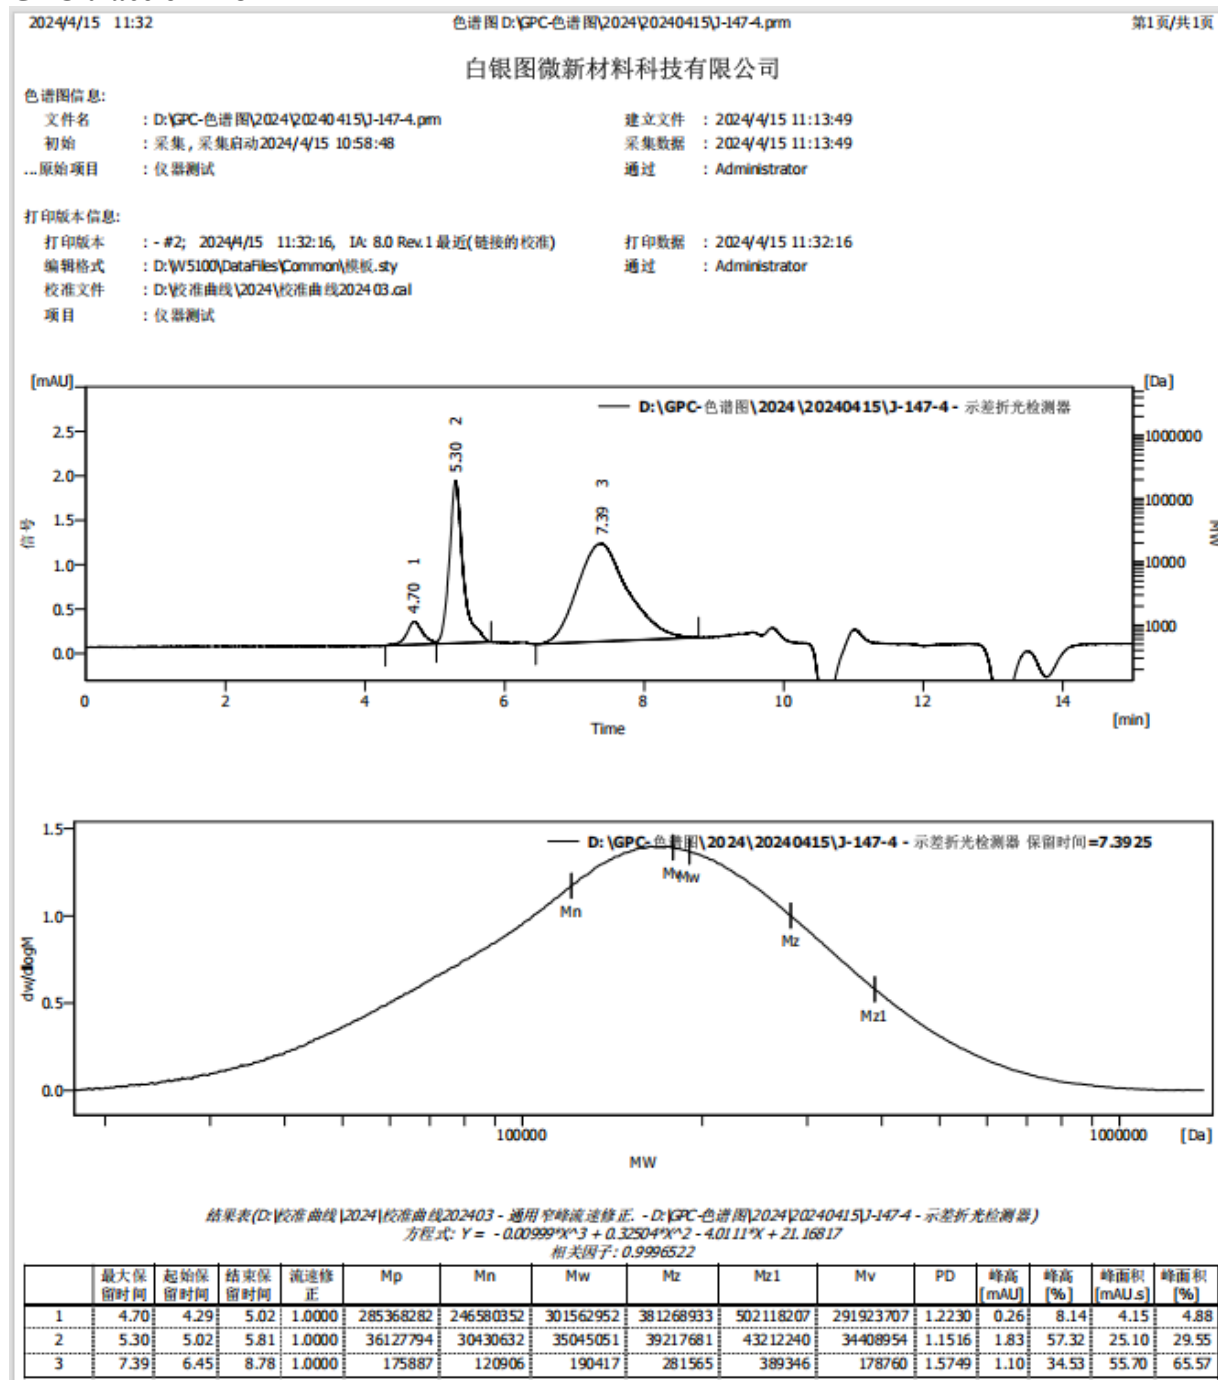

# GPC trace of P19

## 白银图微新材料科技有限公司

### 色谱图信息:

文件名 : D:\GPC-色谱图\2024\0240415\LN-1135-5.prm 建立文件 : 2024/4/15 12:55:49  
 初始 : 采集, 采集启动2024/4/15 12:40:48 采集数据 : 2024/4/15 12:55:49  
 ...原始项目 : 仪器测试 通过 : Administrator

### 打印版本信息:

打印版本 : - #2; 2024/4/15 13:15:51, IA: 8.0 Rev.1 最近(链接的校准) 打印数据 : 2024/4/15 13:15:52  
 编辑格式 : D:\W5100\DataFiles\Common\模板.sty 通过 : Administrator  
 校准文件 : D:\校准曲线\2024\校准曲线2024 03.cal  
 项目 : 仪器测试

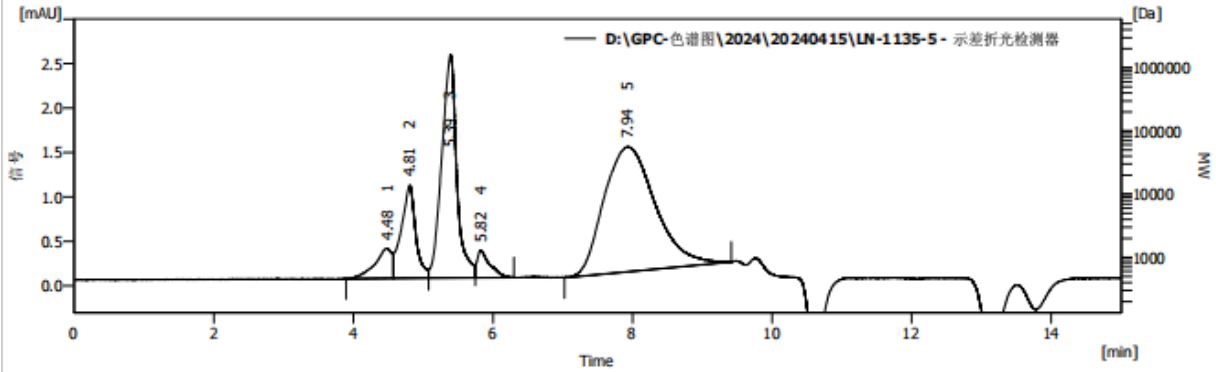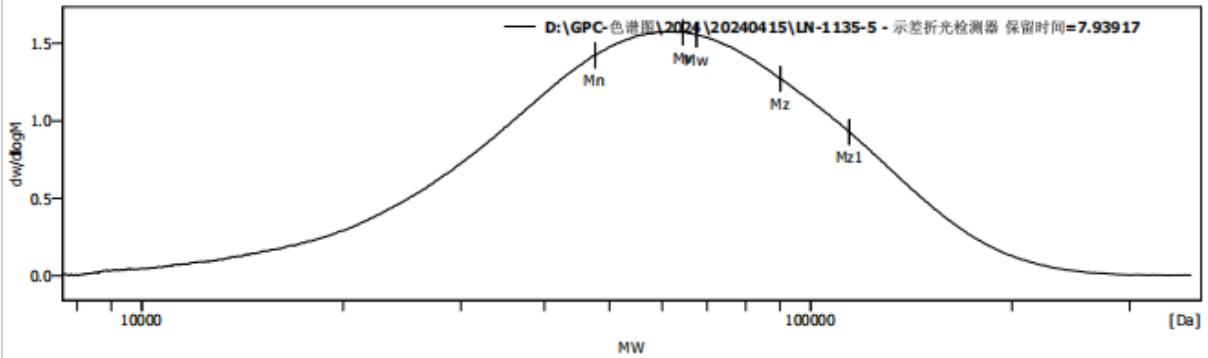

结果表(D:\校准曲线\2024\校准曲线2024 03 - 通用空峰流速修正 - D:\GPC-色谱图\2024\0240415\LN-1135-5 - 示差折光检测器)  
 方程式:  $Y = -0.00999 \times X^3 + 0.32504 \times X^2 - 4.0111 \times X + 21.16817$   
 相关因子: 0.9996522

|   | 最大保留时间 | 起始保留时间 | 结束保留时间 | 流速修正   | Mp        | Mn        | Mw         | Mz         | Mz1        | Mv         | PD     | 峰高 (mAU) | 峰高 (%) | 峰面积 (mAU.s) | 峰面积 (%) |
|---|--------|--------|--------|--------|-----------|-----------|------------|------------|------------|------------|--------|----------|--------|-------------|---------|
| 1 | 4.48   | 3.89   | 4.57   | 1.0000 | 676051169 | 840108035 | 1111467553 | 1678099673 | 2610391411 | 1052806062 | 1.3230 | 0.34     | 6.04   | 5.76        | 4.29    |
| 2 | 4.81   | 4.57   | 5.08   | 1.0000 | 193363299 | 192062455 | 221751349  | 253665274  | 285856486  | 217158943  | 1.1546 | 1.05     | 18.65  | 15.07       | 11.22   |
| 3 | 5.39   | 5.08   | 5.75   | 1.0000 | 26641002  | 25877848  | 29553586   | 33378147   | 37435037   | 29002754   | 1.1420 | 2.52     | 44.76  | 37.51       | 27.92   |
| 4 | 5.82   | 5.75   | 6.30   | 1.0000 | 7258572   | 5590945   | 6084254    | 6501125    | 6841322    | 6017303    | 1.0882 | 0.31     | 5.52   | 3.93        | 2.93    |
| 5 | 7.94   | 7.02   | 9.42   | 1.0000 | 65164     | 47648     | 67513      | 90101      | 114233     | 64411      | 1.4169 | 1.41     | 25.03  | 72.08       | 53.65   |

# GPC trace of P20

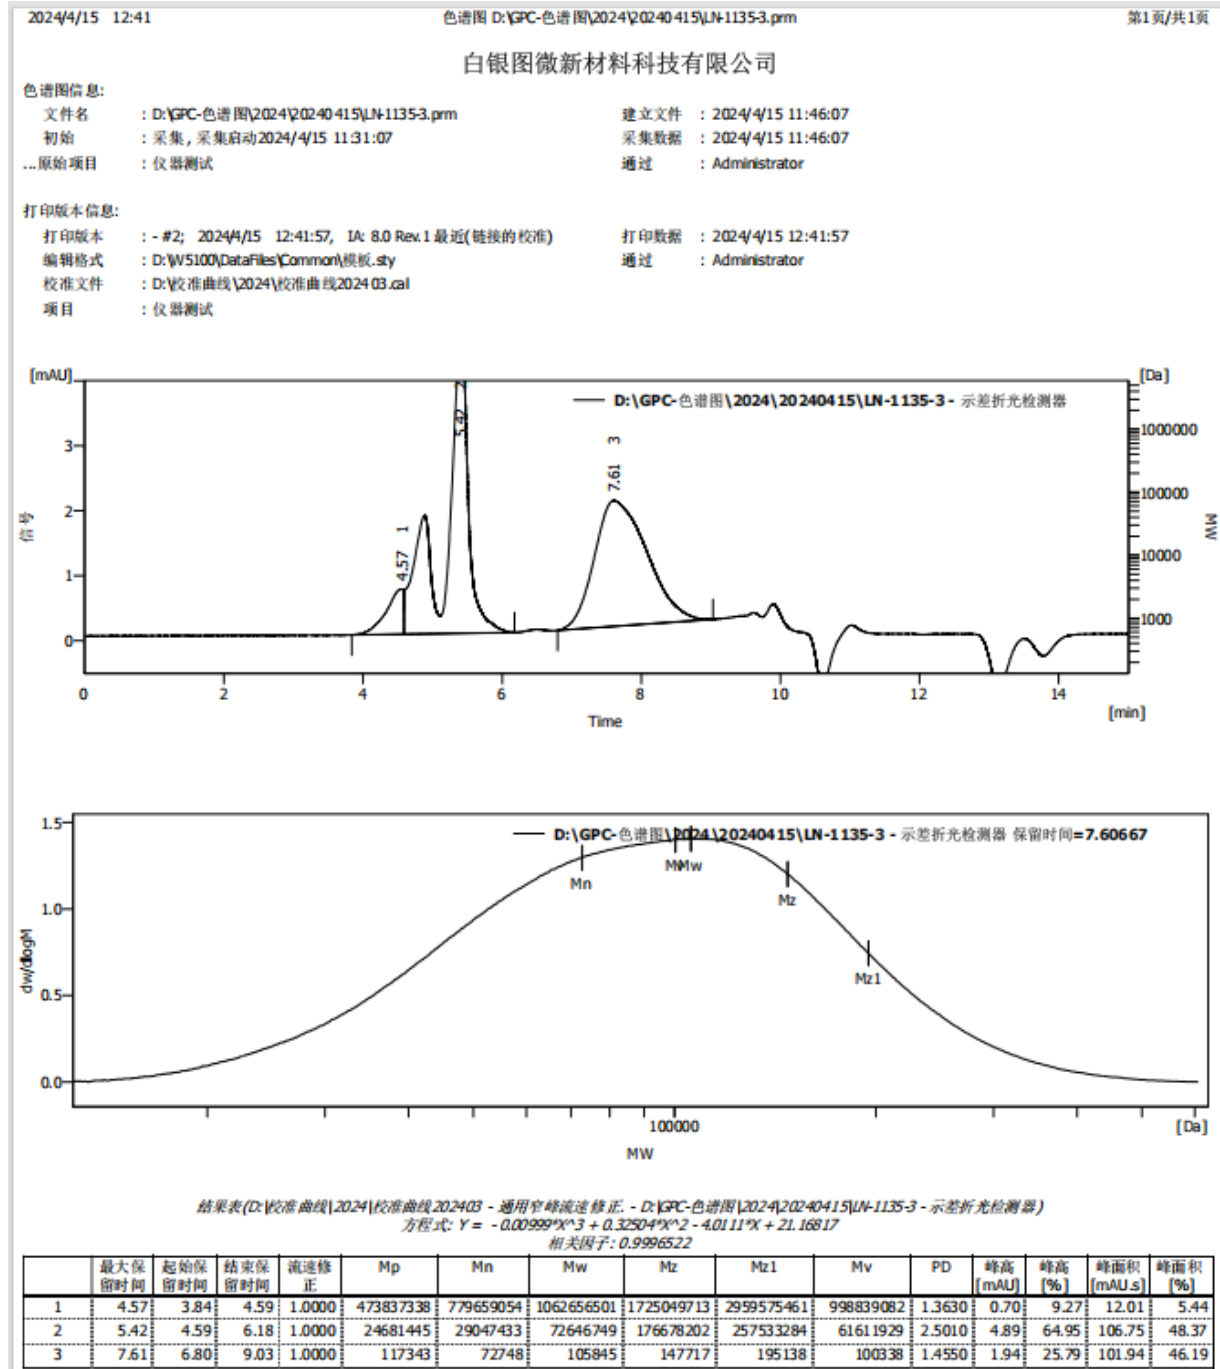

# GPC trace of P21

2024/4/15 18:48

色谱图 D:\GPC-色谱图\2024\20240415\Y-0266-1.prm

第1页/共1页

## 白银图微新材料科技有限公司

### 色谱图信息:

文件名 : D:\GPC-色谱图\2024\20240415\Y-0266-1.prm 建立文件 : 2024/4/15 18:26:58  
 初始 : 采集, 采集启动 2024/4/15 18:11:57 采集数据 : 2024/4/15 18:26:58  
 ...原始项目 : 仪器测试 通过 : Administrator

### 打印版本信息:

打印版本 : - #2; 2024/4/15 18:48:06, IA: 8.0 Rev.1 最近(链接的校准) 打印数据 : 2024/4/15 18:48:06  
 编辑格式 : D:\W5100\DataFiles\Common\模板.sty 通过 : Administrator  
 校准文件 : D:\校准曲线\2024\校准曲线2024.03.cal  
 项目 : 仪器测试

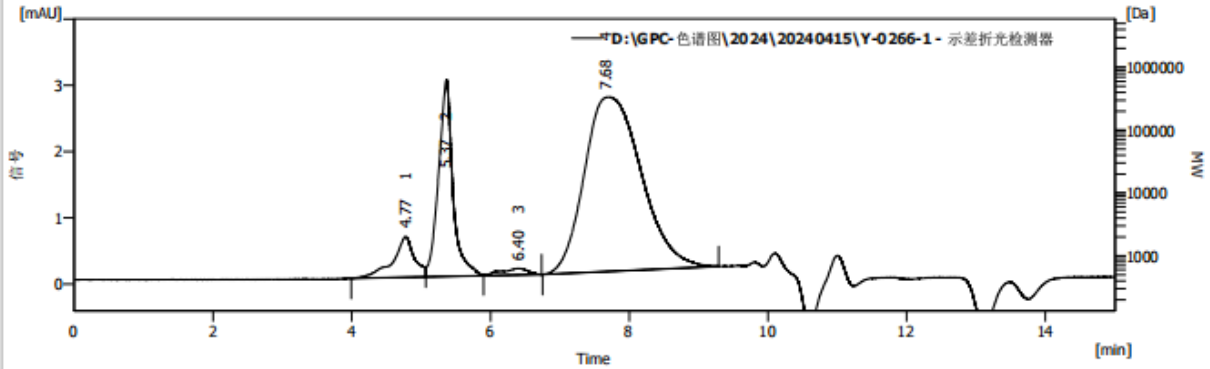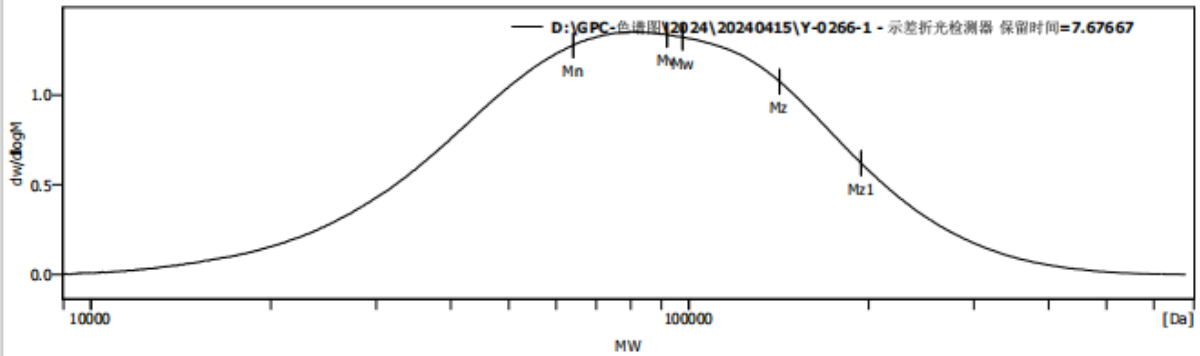

结果表(D:\校准曲线\2024\校准曲线2024.03 - 通用窄峰流速修正 - D:\GPC-色谱图\2024\20240415\Y-0266-1 - 示差折光检测器)  
 方程式:  $Y = -0.00999 \times X^3 + 0.32504 \times X^2 - 4.0111 \times X + 21.16817$   
 相关因子: 0.9996522

|   | 最大保留时间 | 起始保留时间 | 结束保留时间 | 流速修正   | Mp        | Mn        | Mw        | Mz        | Mz1        | Mv        | PD     | 峰高 [mAU] | 峰高 [%] | 峰面积 [mAU.s] | 峰面积 [%] |
|---|--------|--------|--------|--------|-----------|-----------|-----------|-----------|------------|-----------|--------|----------|--------|-------------|---------|
| 1 | 4.77   | 3.99   | 5.07   | 1.0000 | 219695958 | 219895151 | 374614475 | 828643342 | 1657702212 | 336476686 | 1.7036 | 0.61     | 9.71   | 13.22       | 6.32    |
| 2 | 5.37   | 5.07   | 5.90   | 1.0000 | 28922116  | 26373681  | 30939077  | 35245667  | 39626147   | 30300790  | 1.1731 | 2.97     | 47.02  | 42.67       | 20.39   |
| 3 | 6.40   | 5.90   | 6.74   | 1.0000 | 1547383   | 1731264   | 2121064   | 2620552   | 3148856    | 2053745   | 1.2252 | 0.10     | 1.56   | 2.68        | 1.28    |
| 4 | 7.68   | 6.75   | 9.29   | 1.0000 | 103268    | 64145     | 97692     | 141867    | 194364     | 92042     | 1.5230 | 2.63     | 41.71  | 150.68      | 72.01   |

# GPC trace of P22

2024/4/15 19:20

色谱图 D:\GPC-色谱图\2024\20240415\Y-0266-2.prm

第1页/共1页

白银图微新材料科技有限公司

## 色谱图信息:

文件名 : D:\GPC-色谱图\2024\20240415\Y-0266-2.prm 建立文件 : 2024/4/15 19:01:31  
 初始 : 采集, 采集自动2024/4/15 18:46:31 采集数据 : 2024/4/15 19:01:31  
 ...原始项目 : 仪器测试 通过 : Administrator

## 打印版本信息:

打印版本 : - #2; 2024/4/15 19:20:23, IA: 8.0 Rev.1 最近(链接的校准) 打印数据 : 2024/4/15 19:20:23  
 编辑格式 : D:\W5100\DataFiles\Common\模板.sty 通过 : Administrator  
 校准文件 : D:\校准曲线\2024\校准曲线2024.03.cal  
 项目 : 仪器测试

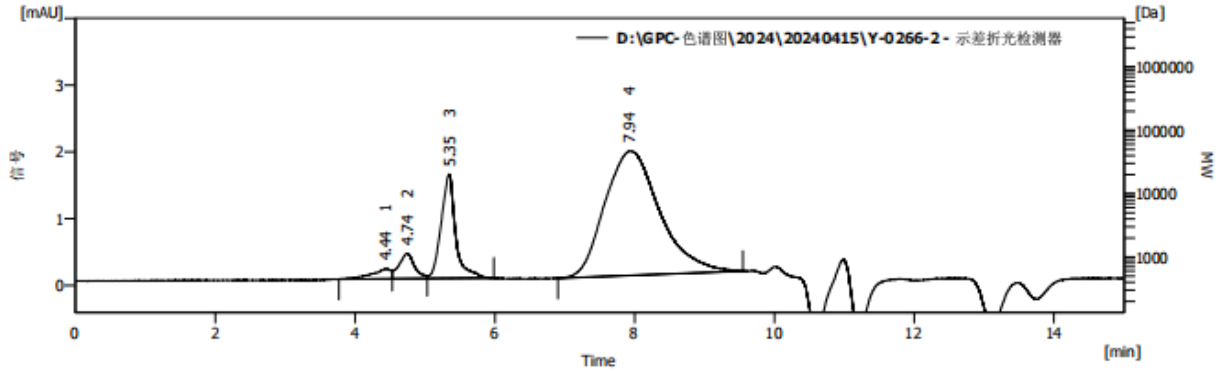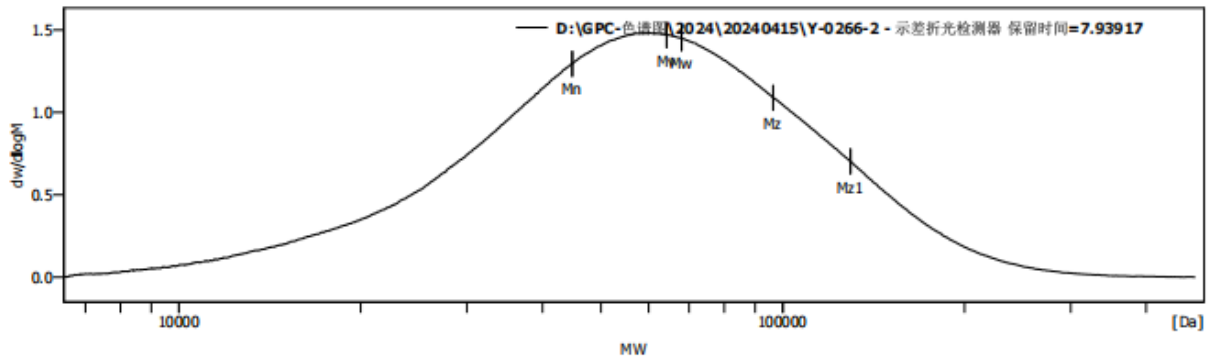

结果表(D:\校准曲线\2024\校准曲线2024.03 - 通用空峰流速修正 - D:\GPC-色谱图\2024\20240415\Y-0266-2 - 示差折光检测器)  
 方程式:  $Y = -0.009999X^3 + 0.32504X^2 - 4.0111X + 21.16817$   
 相关因子: 0.9996522

|   | 最大保留时间 | 起始保留时间 | 结束保留时间 | 流速修正   | Mp        | Mn         | Mw         | Mz         | Mz1        | Mv         | PD     | 峰高 (mAU) | 峰高 (%) | 峰面积 (mAU.s) | 峰面积 (%) |
|---|--------|--------|--------|--------|-----------|------------|------------|------------|------------|------------|--------|----------|--------|-------------|---------|
| 1 | 4.44   | 3.77   | 4.53   | 1.0000 | 791289298 | 1084400418 | 1694586240 | 3253369588 | 5685435294 | 1548619045 | 1.5627 | 0.15     | 3.81   | 2.92        | 2.19    |
| 2 | 4.74   | 4.53   | 5.03   | 1.0000 | 245303551 | 224653187  | 262668940  | 302461670  | 341233793  | 256867167  | 1.1692 | 0.38     | 9.61   | 5.88        | 4.42    |
| 3 | 5.35   | 5.03   | 5.98   | 1.0000 | 30832124  | 27563840   | 32681592   | 37174462   | 41602008   | 31999906   | 1.1857 | 1.56     | 39.46  | 22.33       | 16.77   |
| 4 | 7.94   | 6.90   | 9.55   | 1.0000 | 65164     | 44817      | 68008      | 96417      | 129542     | 64277      | 1.5175 | 1.87     | 47.12  | 102.04      | 76.63   |

# GPC trace of P23

2024/1/30 12:02

色谱图 D:\GPC-色谱图\2024\20240130\Y-0214-2.prm

第1页/共1页

## 白银图微新材料科技有限公司

### 色谱图信息:

文件名 : D:\GPC-色谱图\2024\20240130\Y-0214-2.prm 建立文件 : 2024/1/30 11:58:10  
 初始 : 采集, 采集自动2024/1/30 11:43:10 采集数据 : 2024/1/30 11:58:10  
 ...原始项目 : 仪器测试 通过 : Administrator

### 打印版本信息:

打印版本 : - #2; 2024/1/30 12:02:42, IA: 8.0 Rev.1 最近(链接的校准) 打印数据 : 2024/1/30 12:02:42  
 编辑格式 : D:\V5100\DataFiles\Common\模板.sty 通过 : Administrator  
 校准文件 : D:\校准曲线\2024\校准曲线2024.01.cal  
 项目 : 仪器测试

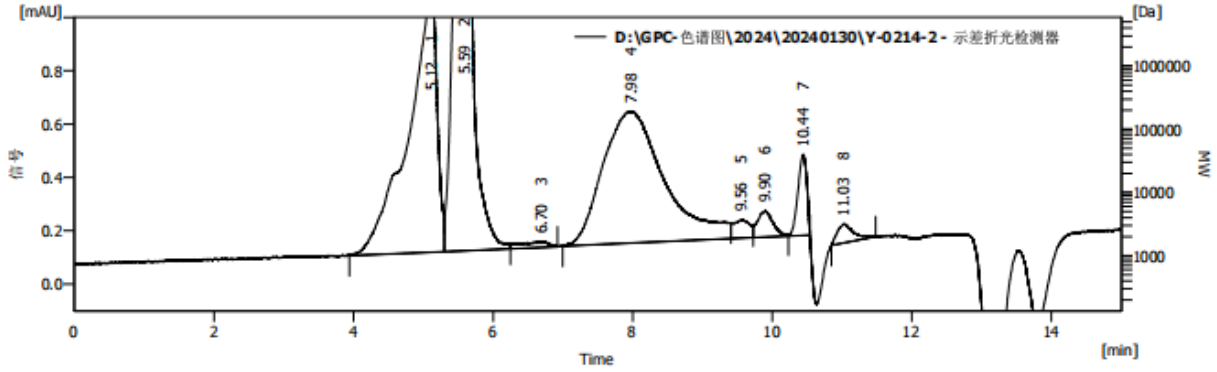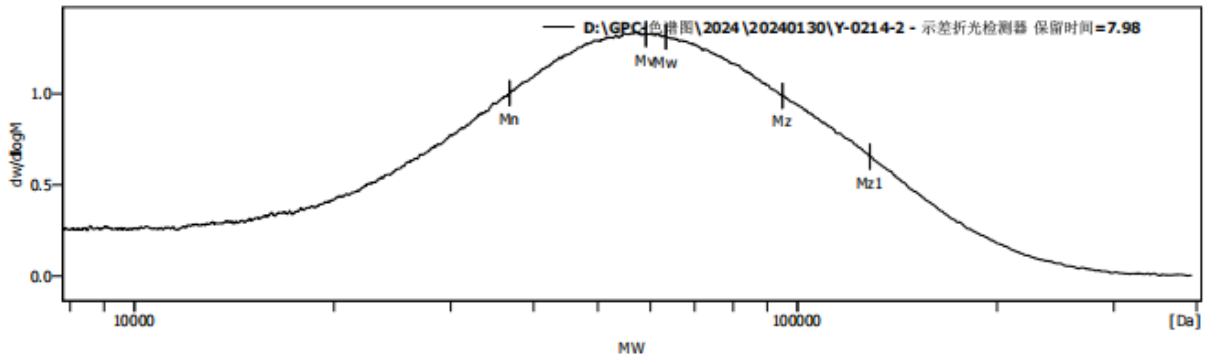

结果表(D:\校准曲线\2024\校准曲线2024.01 - 通用窄峰流速修正 - D:\GPC-色谱图\2024\20240130\Y-0214-2 - 示差折光检测器)  
 方程式:  $Y = -0.01045 * X^3 + 0.3349 * X^2 - 4.07592 * X + 21.30064$   
 相关因子: 0.9996367

|   | 最大保留时间 | 起始保留时间 | 结束保留时间 | 流速修正   | Mp       | Mn        | Mw        | Mz        | Mz1        | Mv        | PD     | 峰高 [mAU] | 峰高 (%) | 峰面积 [mAU.s] | 峰面积 (%) |
|---|--------|--------|--------|--------|----------|-----------|-----------|-----------|------------|-----------|--------|----------|--------|-------------|---------|
| 1 | 5.12   | 3.94   | 5.30   | 1.0000 | 65389773 | 100359395 | 233140172 | 807212707 | 1881712869 | 194044719 | 2.3231 | 0.97     | 21.84  | 27.83       | 26.67   |
| 2 | 5.59   | 5.30   | 6.25   | 1.0000 | 14228378 | 13274349  | 15504989  | 17447305  | 19295115   | 15208463  | 1.1680 | 2.42     | 54.29  | 39.07       | 37.45   |
| 3 | 6.70   | 6.25   | 6.92   | 1.0000 | 768946   | 980013    | 1157983   | 1359183   | 1548262    | 1129079   | 1.1816 | 0.02     | 0.52   | 0.64        | 0.62    |
| 4 | 7.98   | 7.00   | 9.41   | 1.0000 | 61576    | 36827     | 63337     | 95003     | 128658     | 59095     | 1.7199 | 0.50     | 11.15  | 30.29       | 29.03   |
| 5 | 9.56   | 9.41   | 9.73   | 1.0000 | 6408     | 6381      | 6458      | 6535      | 6612       | 6446      | 1.0121 | 0.07     | 1.55   | 1.13        | 1.09    |
| 6 | 9.90   | 9.73   | 10.23  | 1.0000 | 4261     | 4170      | 4235      | 4296      | 4355       | 4225      | 1.0154 | 0.10     | 2.22   | 1.53        | 1.47    |



# GPC trace of P24

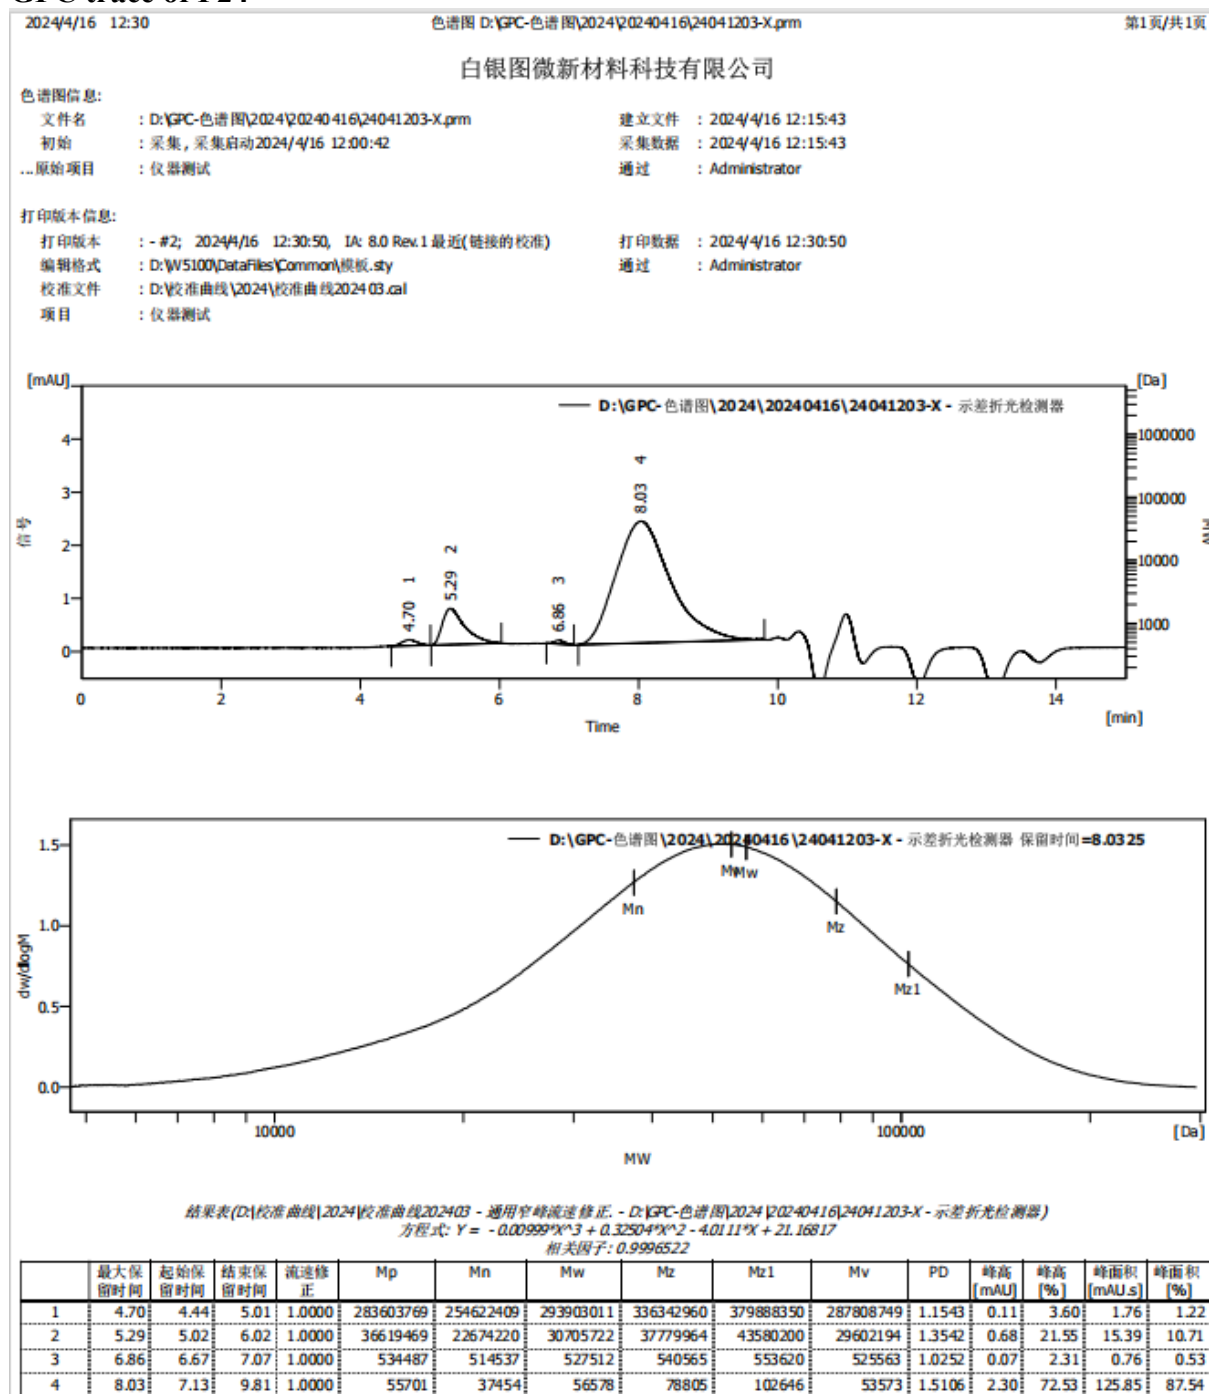

# GPC trace of P25

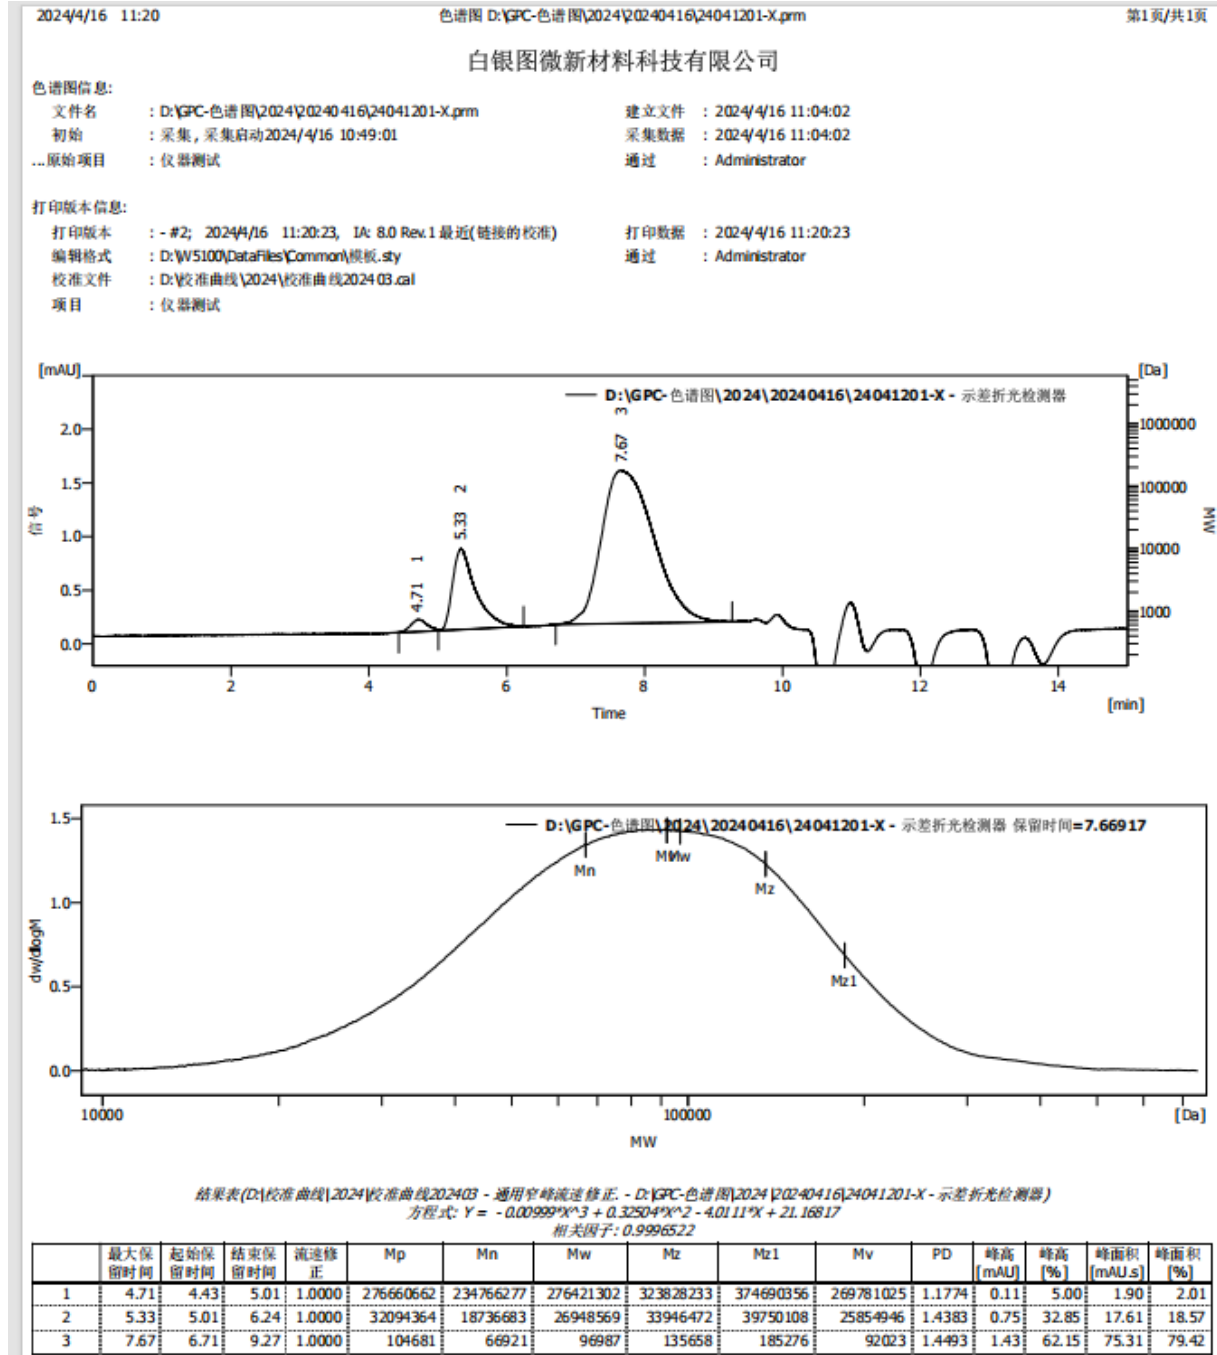

# GPC trace of P26

## 白银图微新材料科技有限公司

### 色谱图信息:

文件名 : D:\GPC-色谱图\2024\20240416\Y-0266-3.prm 建立文件 : 2024/4/16 10:31:17  
 初始 : 采集, 采集启动2024/4/16 10:16:17 采集数据 : 2024/4/16 10:31:17  
 ...原始项目 : 仪器测试 通过 : Administrator

### 打印版本信息:

打印版本 : - #2; 2024/4/16 10:52:37, IA: 8.0 Rev.1 最近(链接的校准) 打印数据 : 2024/4/16 10:52:37  
 编辑格式 : D:\W5100\DataFiles\Common\模板.sty 通过 : Administrator  
 校准文件 : D:\校准曲线\2024\校准曲线2024 03.cal  
 项目 : 仪器测试

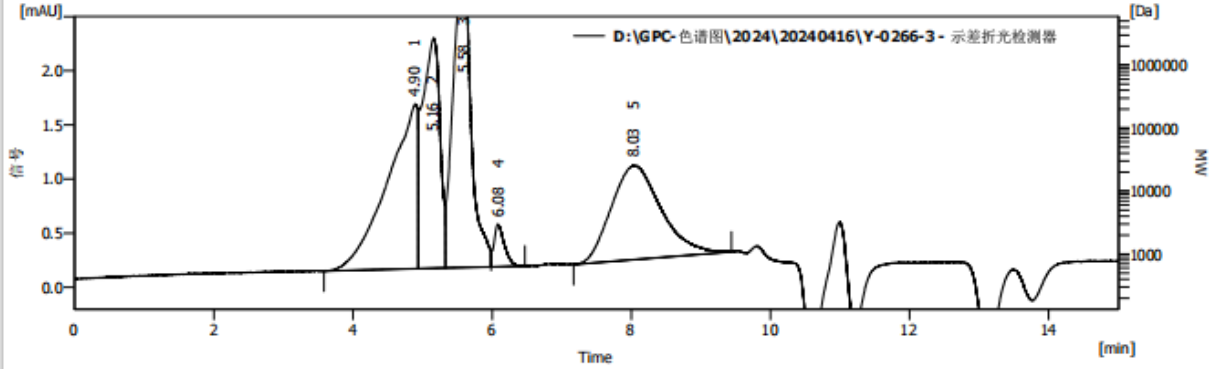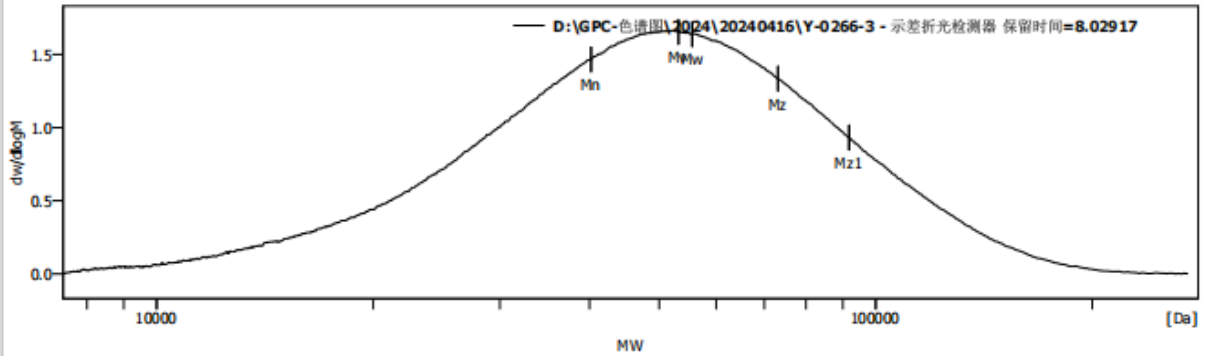

结果表(D:\校准曲线\2024\校准曲线202403 - 通用空峰流速修正 - D:\GPC-色谱图\2024\20240416\Y-0266-3 - 示差折光检测器)  
 方程式:  $Y = -0.009999 \times X^3 + 0.32504 \times X^2 - 4.0111 \times X + 21.16817$   
 相关因子: 0.9996522

|   | 最大保留时间 | 起始保留时间 | 结束保留时间 | 流速修正   | Mp        | Mn        | Mw        | Mz         | Mz1        | Mv        | PD     | 峰高 (mAU) | 峰高 (%) | 峰面积 (mAU.s) | 峰面积 (%) |
|---|--------|--------|--------|--------|-----------|-----------|-----------|------------|------------|-----------|--------|----------|--------|-------------|---------|
| 1 | 4.90   | 3.58   | 4.94   | 1.0000 | 141152461 | 291692951 | 758128126 | 3255000411 | 8876738052 | 613274927 | 2.5991 | 1.52     | 19.77  | 45.69       | 25.21   |
| 2 | 5.16   | 4.94   | 5.33   | 1.0000 | 57638271  | 61201893  | 68444019  | 76237554   | 83750657   | 67306742  | 1.1183 | 2.13     | 27.64  | 37.41       | 20.64   |
| 3 | 5.58   | 5.33   | 5.98   | 1.0000 | 14783328  | 13676061  | 15888380  | 18009592   | 19992162   | 15569220  | 1.1618 | 2.78     | 36.17  | 50.59       | 27.91   |
| 4 | 6.08   | 5.98   | 6.47   | 1.0000 | 3532752   | 3151472   | 3289786   | 3413334    | 3523865    | 3270457   | 1.0439 | 0.39     | 5.09   | 4.13        | 2.28    |
| 5 | 8.03   | 7.17   | 9.44   | 1.0000 | 56011     | 40217     | 55594     | 73139      | 91867      | 53182     | 1.3824 | 0.87     | 11.33  | 43.44       | 23.96   |

# GPC trace of P27

## 白银图微新材料科技有限公司

### 色谱图信息:

文件名 : D:\GPC-色谱图\2024\0240416\24041202-X.prm 建立文件 : 2024/4/16 11:33:36  
 初始 : 采集, 采集启动 2024/4/16 11:18:35 采集数据 : 2024/4/16 11:33:36  
 ...原始项目 : 仪器测试 通过 : Administrator

### 打印版本信息:

打印版本 : - #2; 2024/4/16 12:00:15, IA: 8.0 Rev.1 最近(链接的校准) 打印数据 : 2024/4/16 12:00:15  
 编辑格式 : D:\W5100\DataFiles\Common\模板.sty 通过 : Administrator  
 校准文件 : D:\校准曲线\2024\校准曲线2024.03.cal  
 项目 : 仪器测试

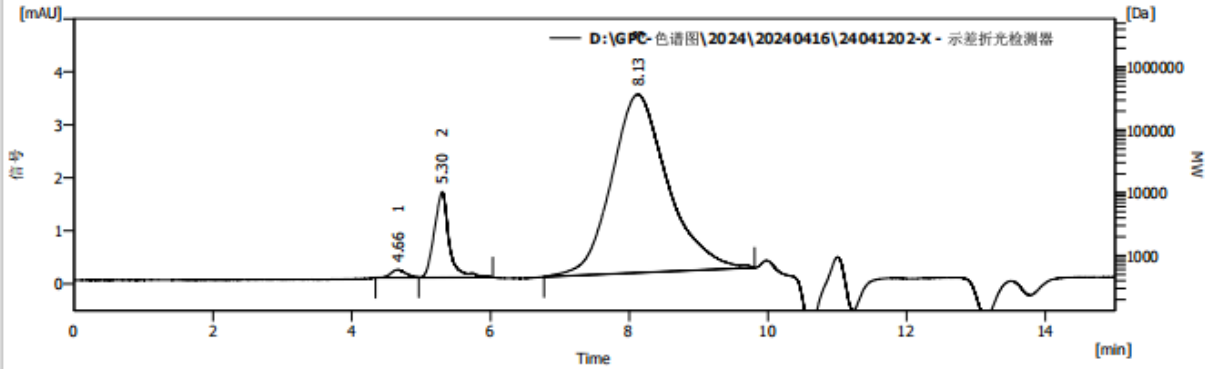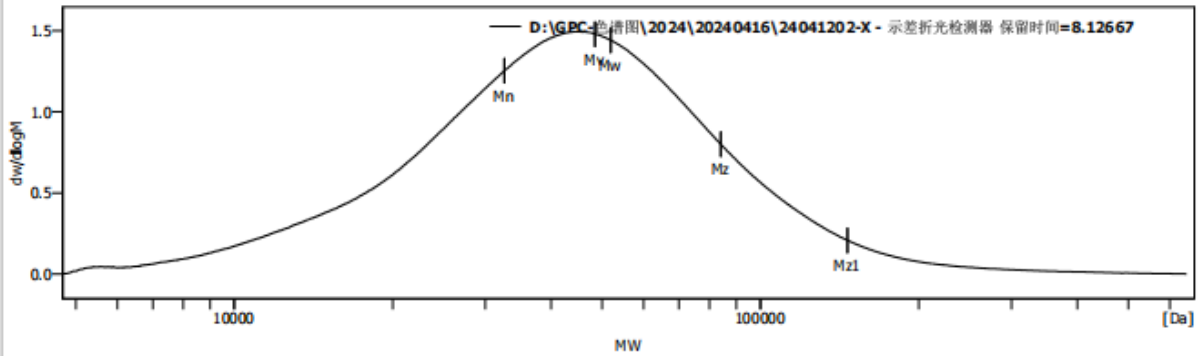

结果表(D:\校准曲线\2024\校准曲线2024.03 - 通用窄峰流速修正 - D:\GPC-色谱图\2024\0240416\24041202-X - 示差折光检测器)  
 方程式:  $Y = -0.00999 \times X^3 + 0.32504 \times X^2 - 4.0111 \times X + 21.16817$   
 相关因子: 0.9996522

|   | 最大保留时间 | 起始保留时间 | 结束保留时间 | 流速修正   | Mp        | Mn        | Mw        | Mz        | Mz1       | Mv        | PD     | 峰高 [mAU] | 峰高 [%] | 峰面积 [mAU.s] | 峰面积 [%] |
|---|--------|--------|--------|--------|-----------|-----------|-----------|-----------|-----------|-----------|--------|----------|--------|-------------|---------|
| 1 | 4.66   | 4.34   | 4.96   | 1.0000 | 333489014 | 287283024 | 335135624 | 391984538 | 461431218 | 327436239 | 1.1666 | 0.15     | 2.96   | 2.29        | 1.06    |
| 2 | 5.30   | 4.96   | 6.03   | 1.0000 | 35165963  | 28854559  | 36316776  | 41718853  | 46507221  | 35447315  | 1.2586 | 1.62     | 31.52  | 24.03       | 11.09   |
| 3 | 8.13   | 6.77   | 9.81   | 1.0000 | 47709     | 32642     | 51938     | 84051     | 146498    | 48498     | 1.5912 | 3.37     | 65.52  | 190.35      | 87.85   |

# GPC trace of P28

## 白银图微新材料科技有限公司

### 色谱图信息:

文件名 : D:\GPC-色谱图\2024\20240604\L-1140-C6.prm 建立文件 : 2024/6/4 11:45:22  
 初始 : 采集, 采集启动2024/6/4 11:30:21 采集数据 : 2024/6/4 11:45:22  
 ...原始项目 : 仪器测试 通过 : Administrator

### 打印版本信息:

打印版本 : - #2; 2024/6/4 12:04:07, IA: 8.0 Rev.1 最近(链接的校准) 打印数据 : 2024/6/4 12:04:07  
 编辑格式 : D:\W5100\DataFiles\Common\模板.sty 通过 : Administrator  
 校准文件 : D:\校准曲线\2024\校准曲线2024.05.cal  
 项目 : 仪器测试

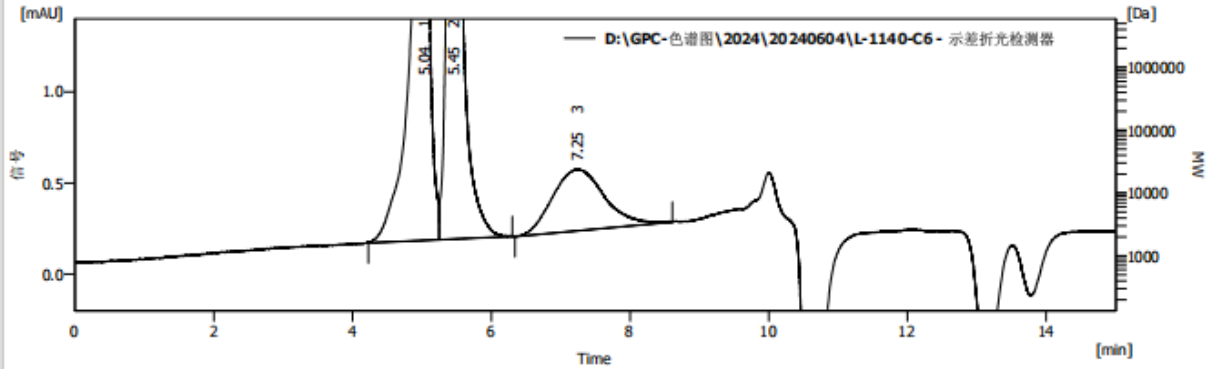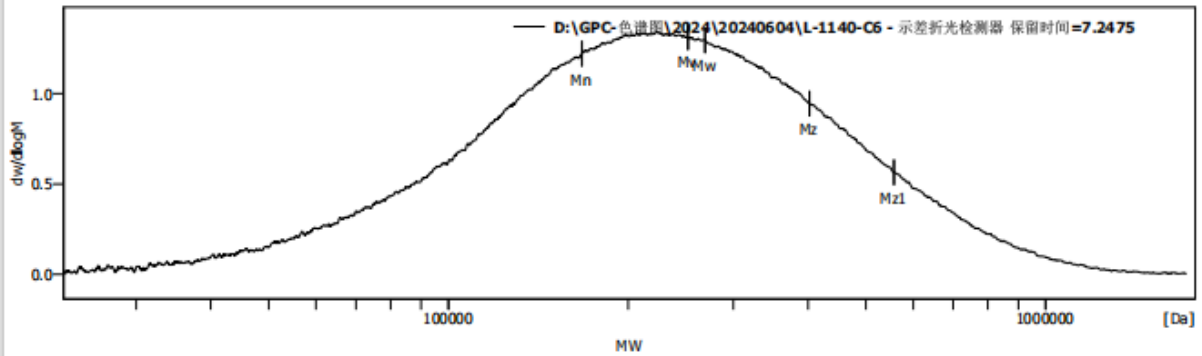

结果表(D:\校准曲线\2024\校准曲线2024.05 - 通用窄峰流修正 - D:\GPC-色谱图\2024\20240604\L-1140-C6 - 示差折光检测器)  
 方程式:  $Y = -0.00664 * X^3 + 0.23626 * X^2 - 3.24007 * X + 18.97824$   
 相关因子: 0.9996642

|   | 最大保留时间 | 起始保留时间 | 结束保留时间 | 流速修正   | Mp       | Mn       | Mw       | Mz        | Mz1       | Mv       | PD     | 峰高 (mAU) | 峰高 (%) | 峰面积 (mAU.s) | 峰面积 (%) |
|---|--------|--------|--------|--------|----------|----------|----------|-----------|-----------|----------|--------|----------|--------|-------------|---------|
| 1 | 5.04   | 4.23   | 5.25   | 1.0000 | 63814868 | 76169197 | 98334706 | 152969237 | 266967789 | 93287135 | 1.2910 | 3.26     | 39.48  | 50.17       | 40.31   |
| 2 | 5.45   | 5.25   | 6.30   | 1.0000 | 18107800 | 15086972 | 16978847 | 18375099  | 19543041  | 16750177 | 1.1254 | 4.66     | 56.43  | 56.77       | 45.61   |
| 3 | 7.25   | 6.34   | 8.61   | 1.0000 | 238202   | 167420   | 269036   | 402493    | 557409    | 252009   | 1.6070 | 0.34     | 4.09   | 17.53       | 14.09   |

# GPC trace of P1-1

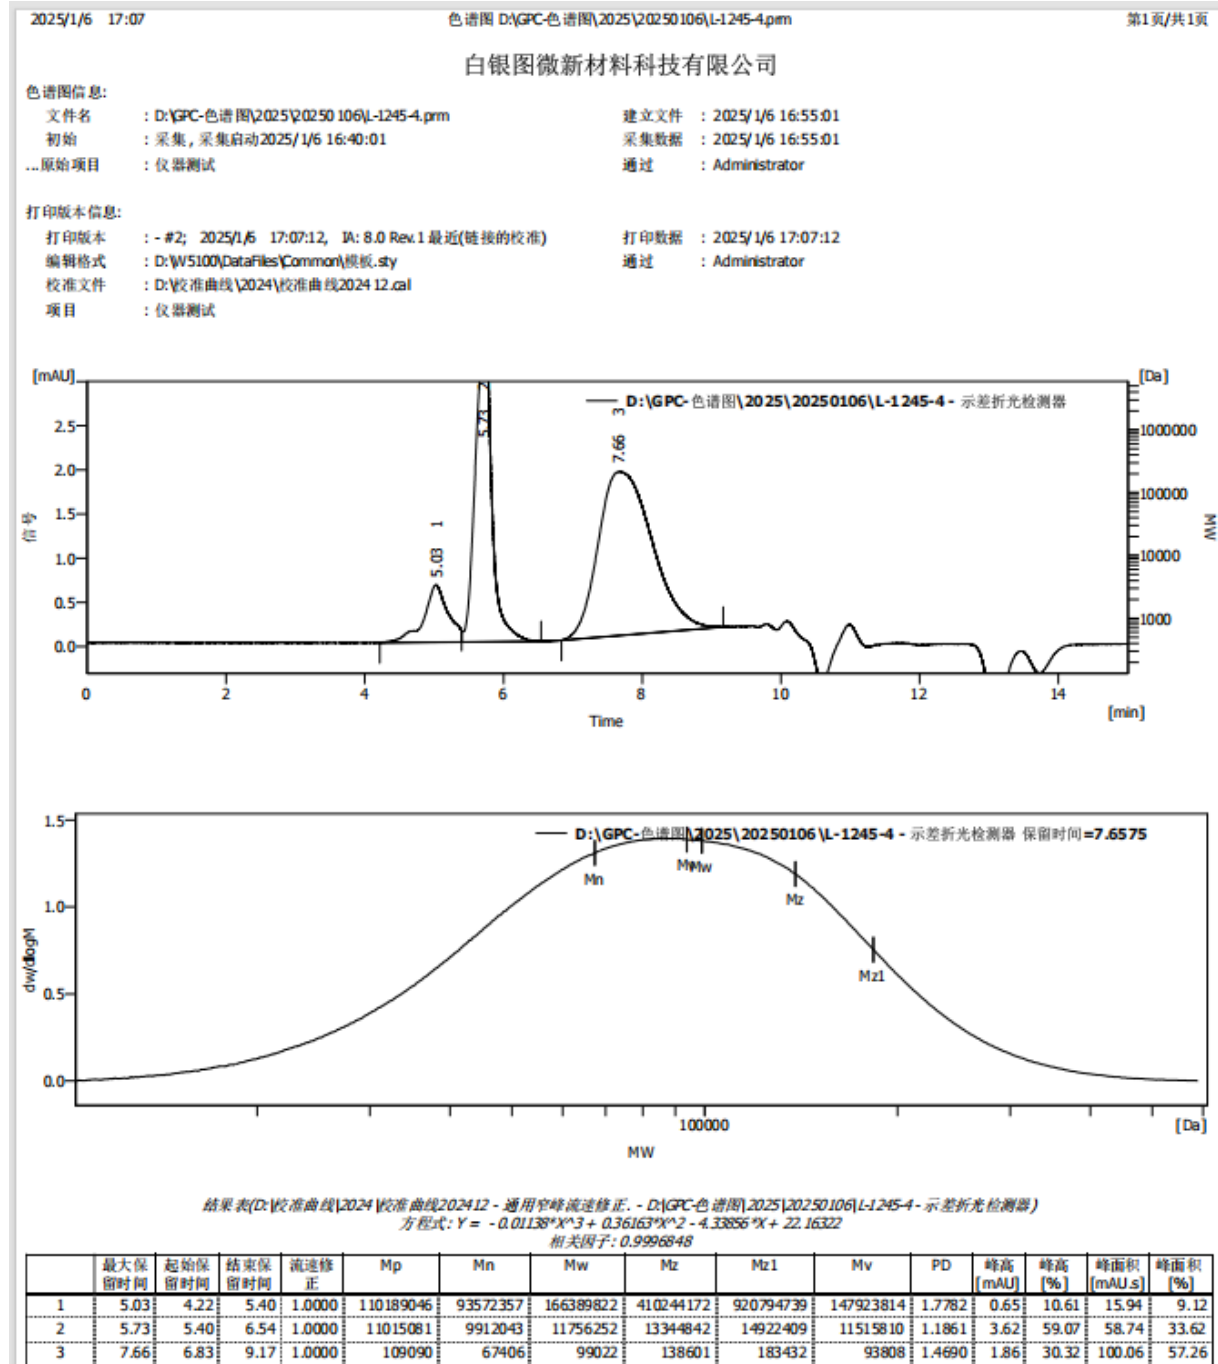

# GPC trace of P1-100kg

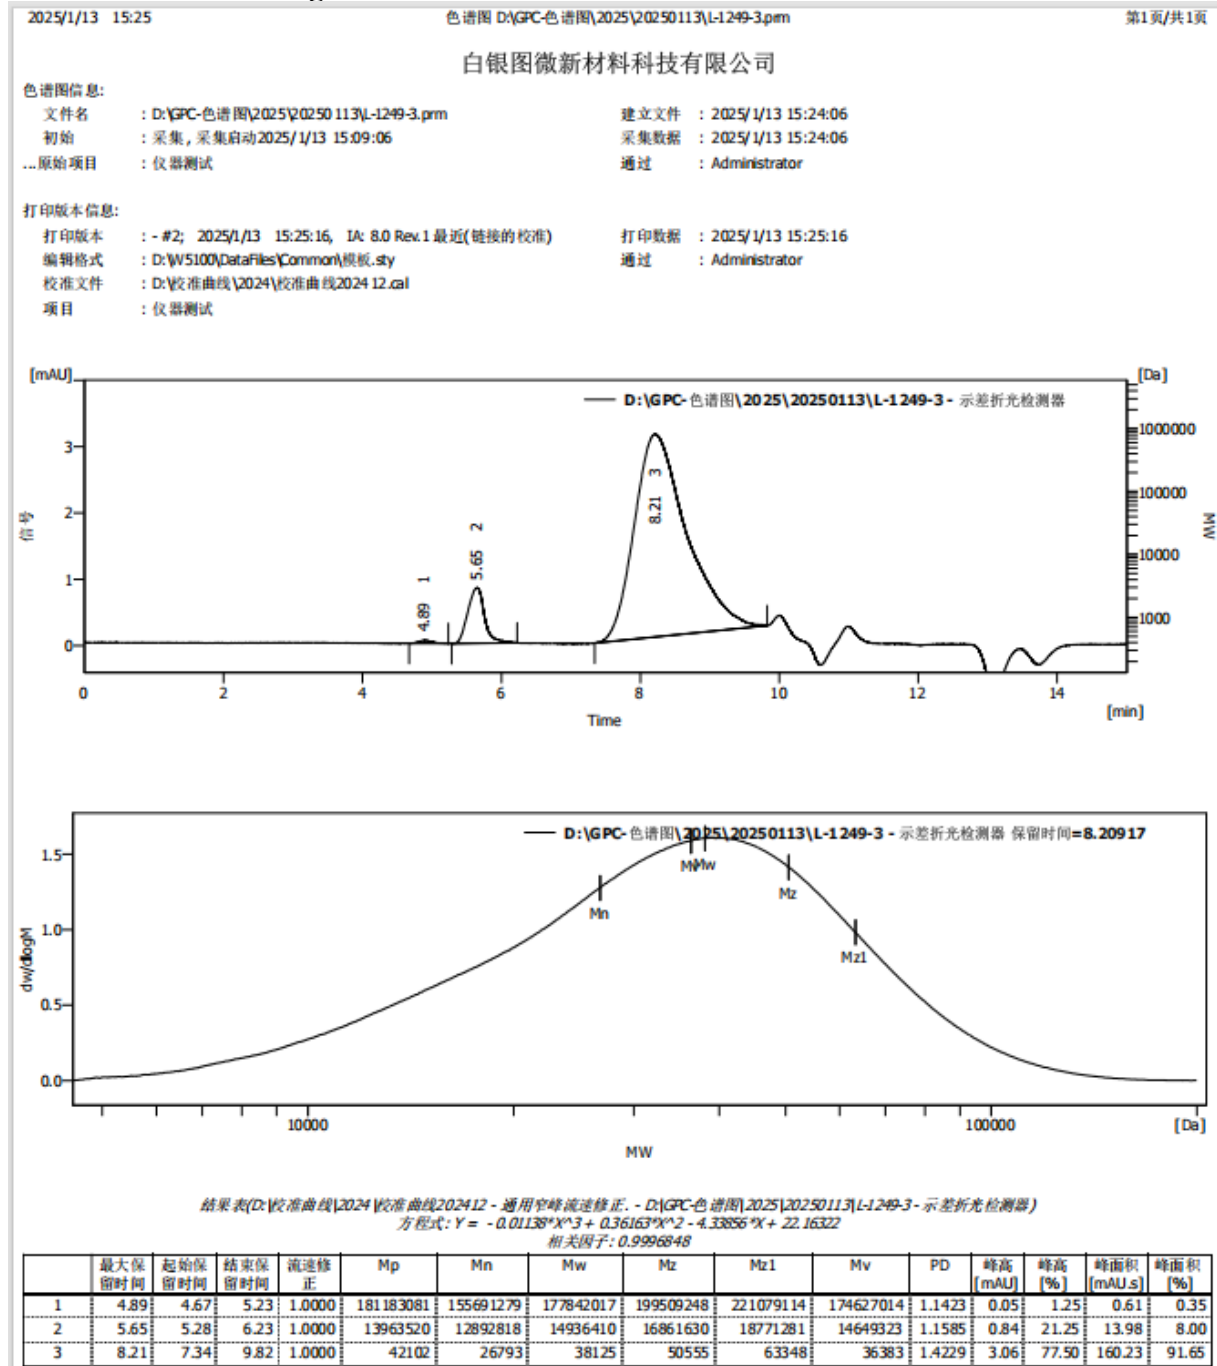

# GPC trace of P8-1

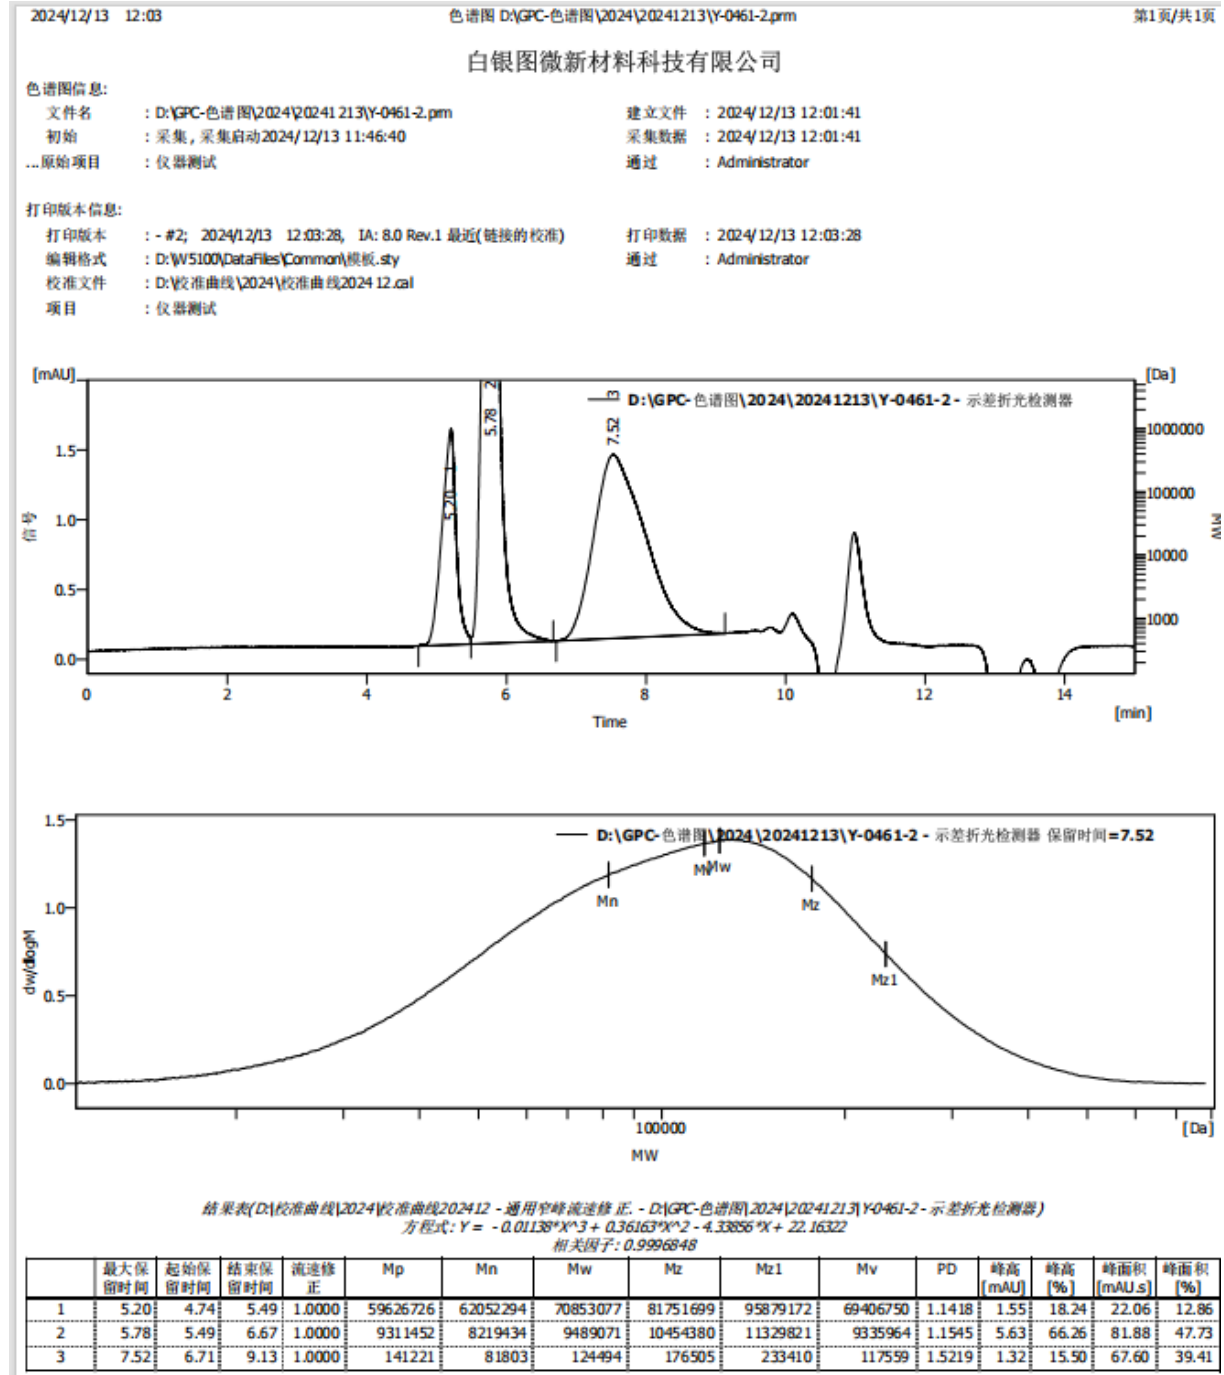



# GPC trace of P9-1

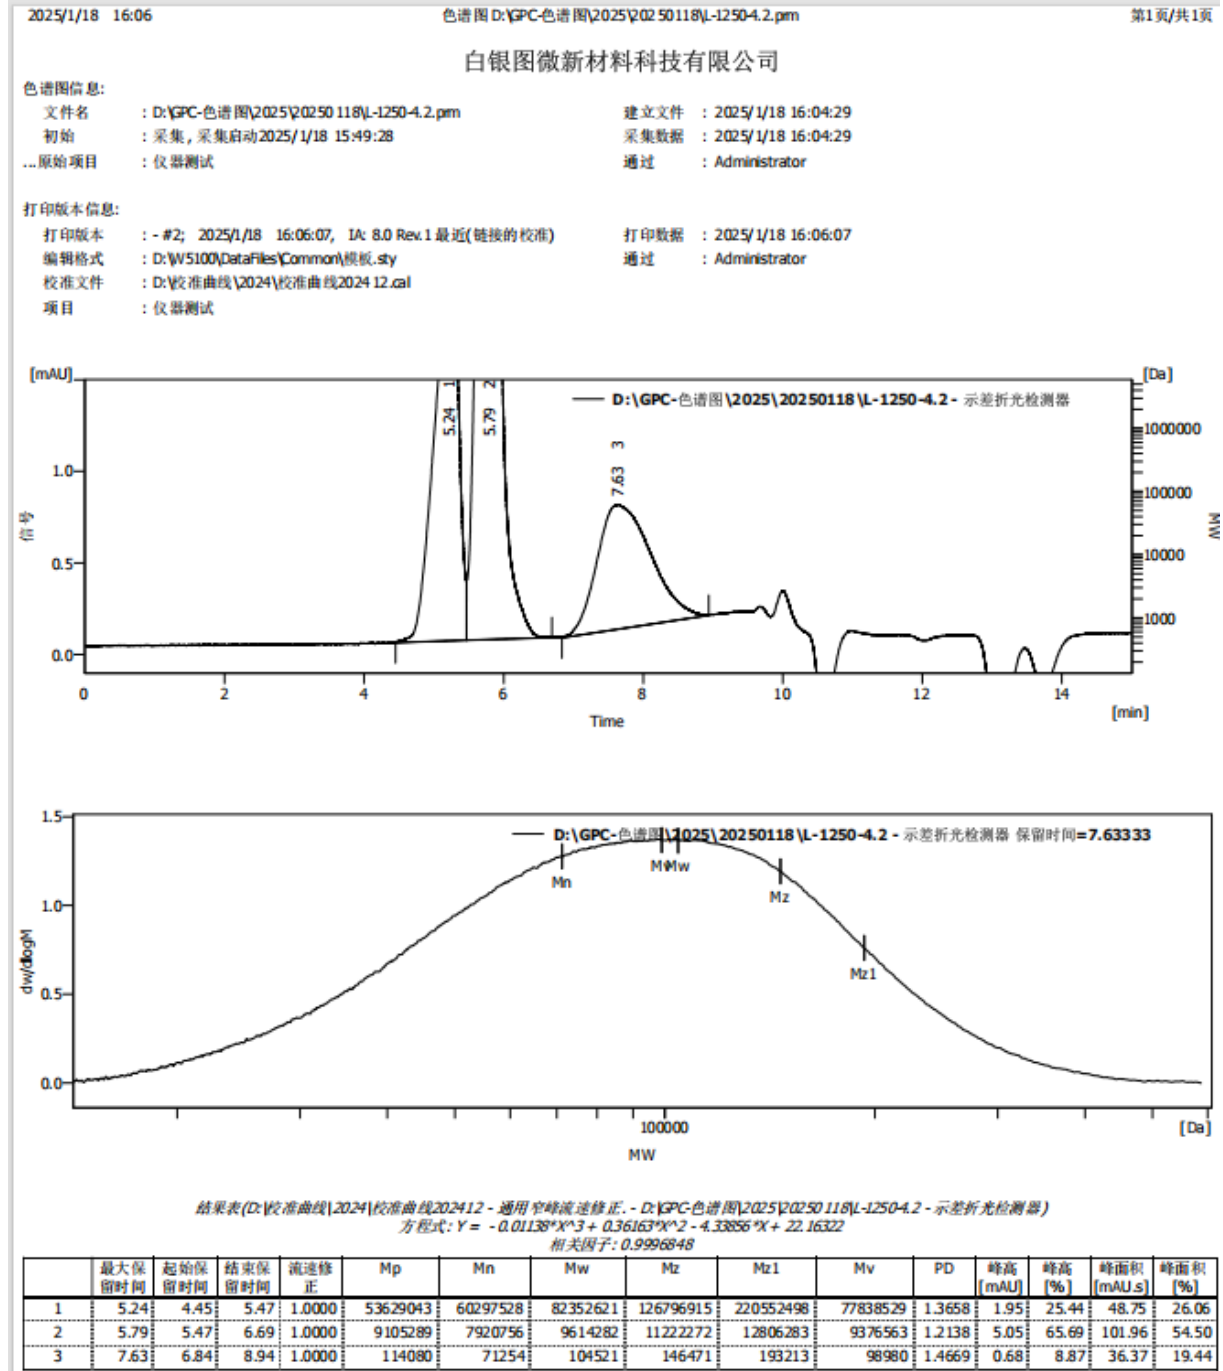

# GPC trace of P13-1

## 白银图微新材料科技有限公司

### 色谱图信息:

文件名 : D:\GPC-色谱图\2024\20241214\Y-0462-1.prm 建立文件 : 2024/12/14 14:00:28  
 初始 : 采集, 采集启动2024/12/14 13:45:27 采集数据 : 2024/12/14 14:00:27  
 ...原始项目 : 仪器测试 通过 : Administrator

### 打印版本信息:

打印版本 : - #2; 2024/12/14 14:01:21, IA: 8.0 Rev.1 最近(链接)的校准 打印数据 : 2024/12/14 14:01:21  
 编辑格式 : D:\W5100\DataFiles\Common\模板.sty 通过 : Administrator  
 校准文件 : D:\校准曲线\2024\校准曲线2024.12.cal  
 项目 : 仪器测试

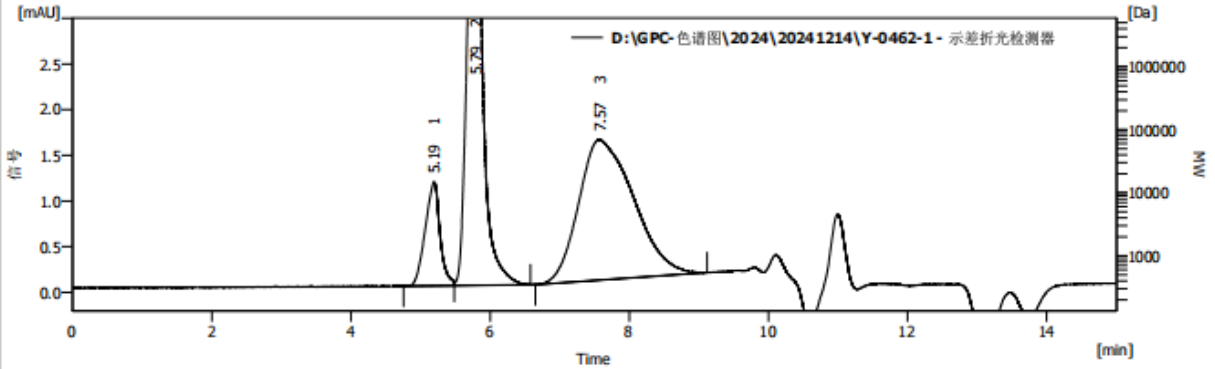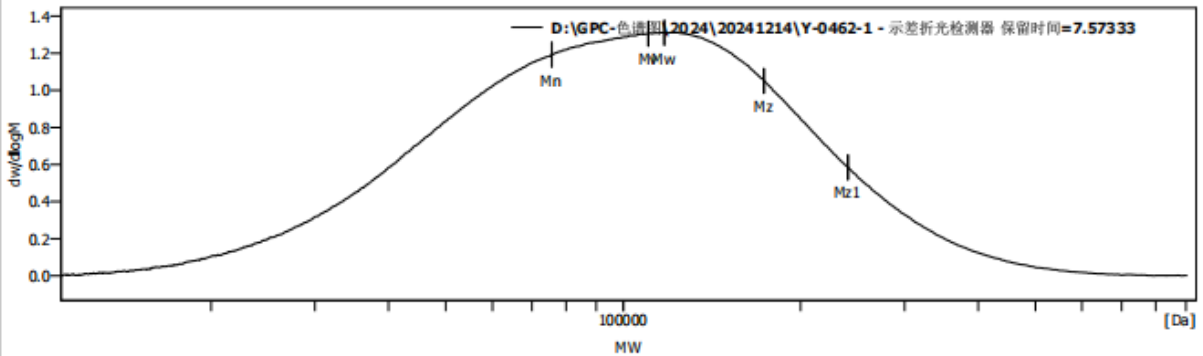

结果表(D:\校准曲线\2024\校准曲线2024.12 - 通用窄峰流速修正 - D:\GPC-色谱图\2024\20241214\Y-0462-1 - 示差折光检测器)  
 方程式:  $Y = -0.01138 * X^3 + 0.36163 * X^2 - 4.33856 * X + 22.16322$   
 相关因子: 0.9996848

|   | 最大保留时间 | 起始保留时间 | 结束保留时间 | 流速修正   | Mp       | Mn       | Mw       | Mz       | Mz1      | Mv       | PD     | 峰高 [mAU] | 峰高 [%] | 峰面积 [mAU.s] | 峰面积 [%] |
|---|--------|--------|--------|--------|----------|----------|----------|----------|----------|----------|--------|----------|--------|-------------|---------|
| 1 | 5.19   | 4.76   | 5.48   | 1.0000 | 62619860 | 62270554 | 71296995 | 82006943 | 94998027 | 69841895 | 1.1450 | 1.14     | 14.12  | 16.84       | 9.34    |
| 2 | 5.79   | 5.48   | 6.58   | 1.0000 | 9082689  | 8074227  | 9288747  | 10267760 | 11165334 | 9134951  | 1.1504 | 5.38     | 66.77  | 78.93       | 43.78   |
| 3 | 7.57   | 6.65   | 9.12   | 1.0000 | 127630   | 75685    | 117452   | 173362   | 240566   | 110347   | 1.5518 | 1.54     | 19.12  | 84.51       | 46.88   |

# GPC trace of P14-1

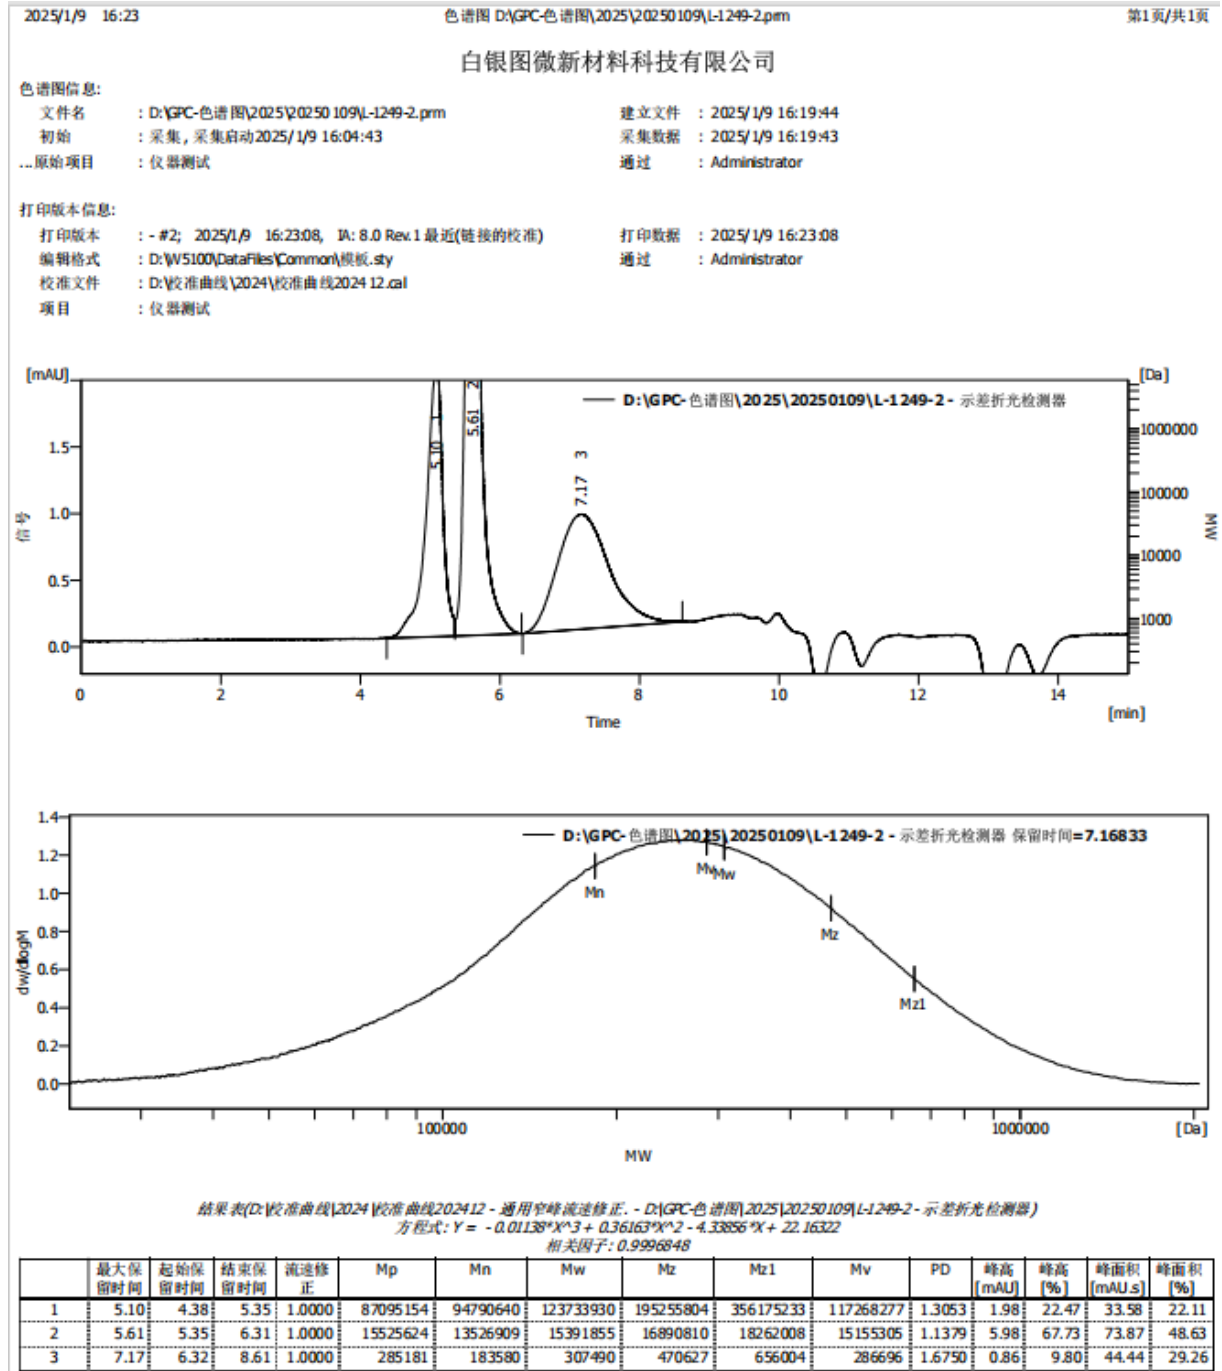

# GPC trace of P20-1

2024/12/13 13:29

色谱图 D:\GPC-色谱图\2024\20241213\Y-0461-2-1.pm

第1页/共1页

白银图微新材料科技有限公司

## 色谱图信息:

文件名 : D:\GPC-色谱图\2024\20241213\Y-0461-2-1.pm 建立文件 : 2024/12/13 13:17:22  
 初始 : 采集, 采集启动2024/12/13 13:02:21 采集数据 : 2024/12/13 13:17:22  
 ...原始项目 : 仪器测试 通过 : Administrator

## 打印版本信息:

打印版本 : - #2; 2024/12/13 13:29:23, IA: 8.0 Rev.1 最近(链接的校准) 打印数据 : 2024/12/13 13:29:23  
 编辑格式 : D:\W5100\DataFiles\Common\模板.sty 通过 : Administrator  
 校准文件 : D:\校准曲线\2024\校准曲线2024 12.cal  
 项目 : 仪器测试

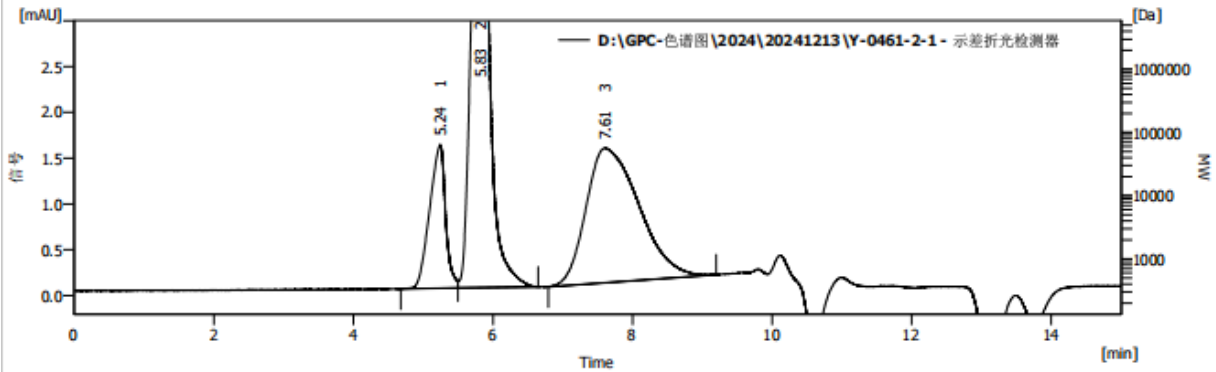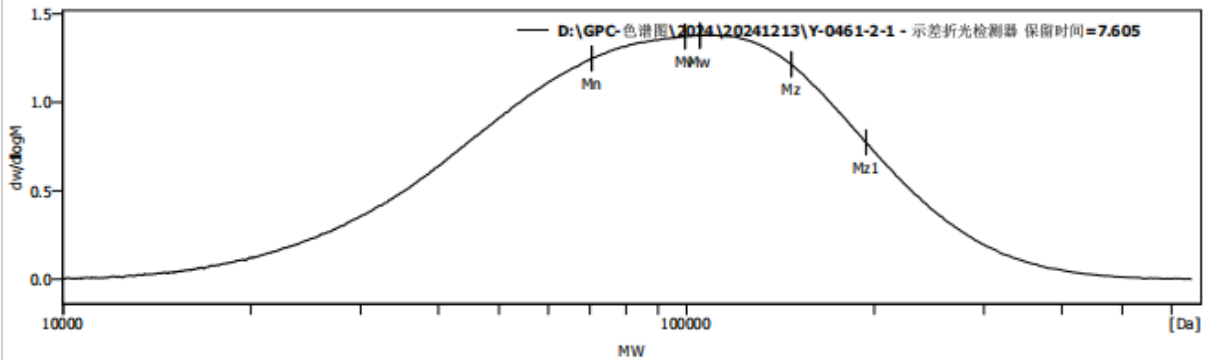

结果表(D:\校准曲线\2024\校准曲线2024 12 - 通用空峰流速修正 - D:\GPC-色谱图\2024\20241213\Y-0461-2-1 - 示差折光检测器)  
 方程式:  $Y = -0.01138 * X^3 + 0.36163 * X^2 - 4.33856 * X + 22.16322$   
 相关因子: 0.9996848

|   | 最大保留时间 | 起始保留时间 | 结束保留时间 | 流速修正   | Mp       | Mn       | Mw       | Mz       | Mz1      | Mv       | PD     | 峰高 [mAU] | 峰高 [%] | 峰面积 [mAU.s] | 峰面积 [%] |
|---|--------|--------|--------|--------|----------|----------|----------|----------|----------|----------|--------|----------|--------|-------------|---------|
| 1 | 5.24   | 4.68   | 5.50   | 1.0000 | 51973192 | 56618723 | 65668887 | 77843539 | 95523314 | 64121132 | 1.1598 | 1.57     | 17.53  | 24.86       | 12.31   |
| 2 | 5.83   | 5.50   | 6.64   | 1.0000 | 8066345  | 7127185  | 8382573  | 9446237  | 10456388 | 8219149  | 1.1761 | 5.90     | 65.99  | 99.73       | 49.37   |
| 3 | 7.61   | 6.79   | 9.20   | 1.0000 | 120264   | 70489    | 105112   | 147282   | 194136   | 99489    | 1.4912 | 1.47     | 16.48  | 77.42       | 38.32   |

# GPC trace of P21-1

2025/1/8 13:52

色谱图 D:\GPC-色谱图\2025\20250108\L-1249-1.ppm

第1页/共1页

白银图微新材料科技有限公司

## 色谱图信息:

文件名 : D:\GPC-色谱图\2025\20250108\L-1249-1.ppm 建立文件 : 2025/1/8 13:51:17  
 初始 : 采集, 采集启动2025/1/8 13:36:16 采集数据 : 2025/1/8 13:51:17  
 ...原始项目 : 仪器测试 通过 : Administrator

## 打印版本信息:

打印版本 : - #2; 2025/1/8 13:52:55, IA: 8.0 Rev.1最近(链接的校准) 打印数据 : 2025/1/8 13:52:55  
 编辑格式 : D:\W5100\DataFiles\Common\模板.sty 通过 : Administrator  
 校准文件 : D:\校准曲线\2024\校准曲线2024.12.cal  
 项目 : 仪器测试

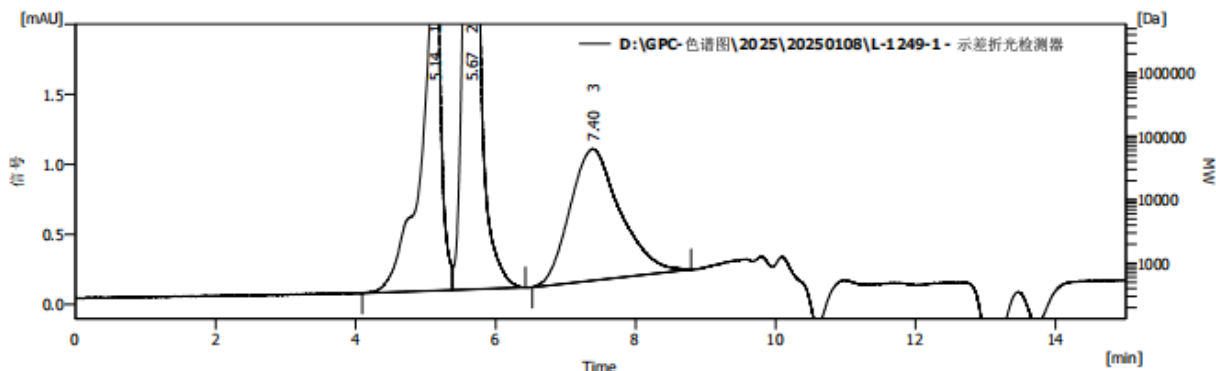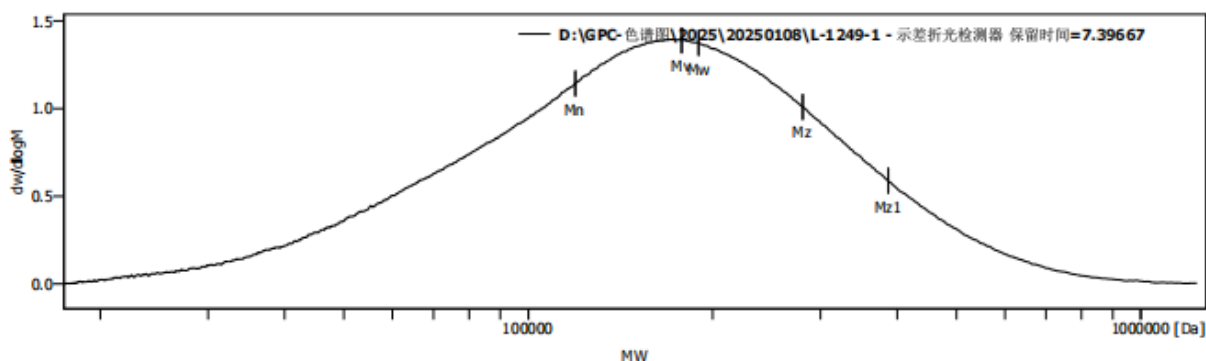

结果表(D:\校准曲线\2024\校准曲线2024.12 - 通用窄峰流速修正. - D:\GPC-色谱图\2025\20250108\L-1249-1 - 示差折光检测器)

方程式:  $Y = -0.01138 * X^3 + 0.36163 * X^2 - 4.33856 * X + 22.16322$

相关因子: 0.9996848

|   | 最大保留时间 | 起始保留时间 | 结束保留时间 | 流速修正   | Mp       | Mn       | Mw        | Mz        | Mz1        | Mv        | PD     | 峰高 (mAU) | 峰高 (%) | 峰面积 (mAU.s) | 峰面积 (%) |
|---|--------|--------|--------|--------|----------|----------|-----------|-----------|------------|-----------|--------|----------|--------|-------------|---------|
| 1 | 5.14   | 4.09   | 5.38   | 1.0000 | 74538373 | 91998565 | 152626643 | 394687859 | 1079206332 | 136041559 | 1.6590 | 2.92     | 30.37  | 49.60       | 28.17   |
| 2 | 5.67   | 5.38   | 6.42   | 1.0000 | 13028128 | 11765396 | 13561909  | 15061344  | 16490563   | 13330010  | 1.1527 | 5.76     | 59.85  | 79.65       | 45.25   |
| 3 | 7.40   | 6.52   | 8.79   | 1.0000 | 179406   | 119324   | 189650    | 280529    | 386883     | 177961    | 1.5894 | 0.94     | 9.78   | 46.79       | 26.58   |

# GPC trace of P27-1

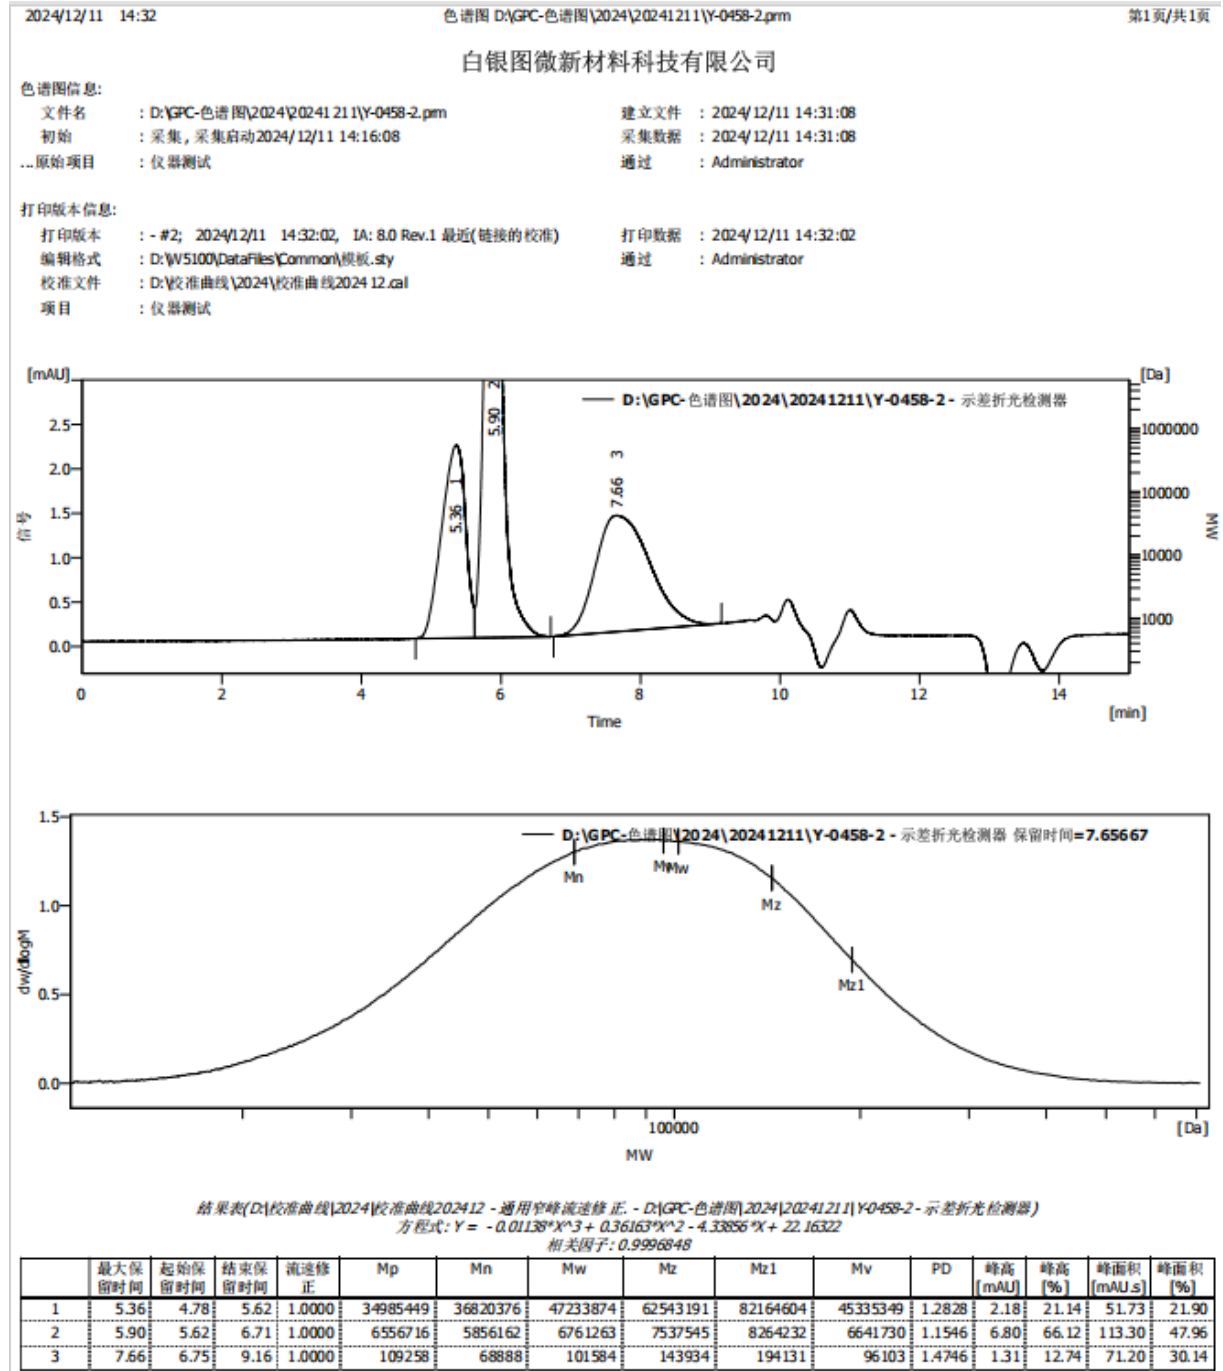

Supplement: d4py01383b1.pdf [file d4py01383b1.pdf]
